# Supplementary material for: Therapeutic targeting of SETD2-deficient cancer cells with the small-molecule compound RITA
Source: Research Square preprint supplement (doi:10.21203/rs.3.rs-8849233/v1), 2026-02-23
Supplement: Supplementary file 2 [file 68b33a6fc86c24ed79c5a02d.xlsx]

## Sheet: Top 100 Destabilised GO Terms
Category	Term	Count	%	PValue	Genes	List Total	Pop Hits	Pop Total	Fold Enrichment	Bonferroni	Benjamini	FDR
GOTERM_BP_DIRECT	GO:0006413~translational initiation	18	19.7802	2.20448e-19	P60228, P60866, P36578, P18124, P46776, Q13144, F8W727, P62753, P62899, P62888, P62424, P61247, F8W7C6, P18077, P62244, P62854, P26373, J3KQN4	86	137	16792	25.654	1.23892e-16	1.23892e-16	3.22668e-16
GOTERM_BP_DIRECT	GO:0006614~SRP-dependent cotranslational protein targeting to membrane	16	17.5824	6.6379e-19	P60866, P36578, P18124, P46776, F8W727, P62753, P62899, P62888, P62424, P61247, F8W7C6, P18077, P62244, P62854, P26373, J3KQN4	86	94	16792	33.235	3.7305e-16	1.86525e-16	9.71586e-16
GOTERM_BP_DIRECT	GO:0000184~nuclear-transcribed mRNA catabolic process, nonsense-mediated decay	17	18.6813	7.29229e-19	P60228, P60866, P36578, P18124, P46776, F8W727, P62753, P62899, P62888, P62424, P61247, F8W7C6, P18077, P62244, P62854, P26373, J3KQN4	86	119	16792	27.8937	4.09827e-16	1.36609e-16	1.06737e-15
GOTERM_BP_DIRECT	GO:0019083~viral transcription	16	17.5824	1.03933e-17	P60866, P36578, P18124, P46776, F8W727, P62753, P62899, P62888, P62424, P61247, F8W7C6, P18077, P62244, P62854, P26373, J3KQN4	86	112	16792	27.8937	5.84101e-15	1.46025e-15	1.52126e-14
GOTERM_BP_DIRECT	GO:0006364~rRNA processing	17	18.6813	9.9462e-15	P60866, Q9Y6V7, P36578, P18124, P46776, F8W727, P62753, P62899, P62888, P62424, P61247, F8W7C6, P18077, P62244, P62854, P26373, J3KQN4	86	214	16792	15.511	5.61551e-12	1.1231e-12	1.46216e-11
GOTERM_BP_DIRECT	GO:0006412~translation	17	18.6813	1.36731e-13	P60866, P36578, P18124, P46776, F8W727, P62753, P62899, P62888, P62424, P61247, F8W7C6, Q9Y450, P18077, P62244, P62854, P26373, J3KQN4	86	253	16792	13.12	7.68701e-11	1.28116e-11	2.00207e-10
GOTERM_BP_DIRECT	GO:0098609~cell-cell adhesion	12	13.1868	1.17194e-07	Q9NYL9, Q9H223, P60228, Q99961, Q15149, P50552, P42224, H3BQK9, P62424, P49327, A0A0D9SF53, P62854	86	271	16792	8.64601	6.5861e-05	9.40898e-06	0.000171537
GOTERM_BP_DIRECT	GO:0002181~cytoplasmic translation	4	4.3956	0.000265635	P18124, P62899, P18077, J3KQN4	86	25	16792	31.2409	0.138695	0.0184902	0.388105
GOTERM_BP_DIRECT	GO:0019886~antigen processing and presentation of exogenous peptide antigen via MHC class II	4	4.3956	0.0113737	Q15436, M0QYZ2, Q14204, P50570	86	92	16792	8.48938	0.998385	0.510462	15.4164
GOTERM_BP_DIRECT	GO:0000082~G1/S transition of mitotic cell cycle	4	4.3956	0.0150012	P33991, Q9UPP1, P62753, Q14566	86	102	16792	7.65709	0.999795	0.572352	19.8472
GOTERM_BP_DIRECT	GO:0010032~meiotic chromosome condensation	2	2.1978	0.0250577	Q15021, Q9NTJ3	86	5	16792	78.1023	0.999999	0.726522	31.0261
GOTERM_BP_DIRECT	GO:0017148~negative regulation of translation	3	3.2967	0.0348609	A5YKK6, A0A0D9SF53, P51114	86	58	16792	10.0994	1	0.810201	40.5101
GOTERM_BP_DIRECT	GO:0006268~DNA unwinding involved in DNA replication	2	2.1978	0.0494947	P33991, Q14566	86	10	16792	39.0512	1	0.888581	52.4313
GOTERM_BP_DIRECT	GO:0034063~stress granule assembly	2	2.1978	0.0494947	Q14204, A0A0D9SF53	86	10	16792	39.0512	1	0.888581	52.4313
GOTERM_BP_DIRECT	GO:0007420~brain development	4	4.3956	0.0718878	Q8NB90, Q9UPP1, F5GYQ1, Q96SZ6	86	190	16792	4.11065	1	0.949951	66.444
GOTERM_BP_DIRECT	GO:0007076~mitotic chromosome condensation	2	2.1978	0.0733262	Q15021, Q9NTJ3	86	15	16792	26.0341	1	0.942342	67.1973
GOTERM_BP_DIRECT	GO:0045948~positive regulation of translational initiation	2	2.1978	0.0733262	Q13144, A0A0D9SF53	86	15	16792	26.0341	1	0.942342	67.1973
GOTERM_BP_DIRECT	GO:0048821~erythrocyte development	2	2.1978	0.0733262	Q9NYL9, P62753	86	15	16792	26.0341	1	0.942342	67.1973
GOTERM_BP_DIRECT	GO:0043162~ubiquitin-dependent protein catabolic process via the multivesicular body sorting pathway	2	2.1978	0.0780212	O75351, Q9UK41	86	16	16792	24.407	1	0.942347	69.5476
GOTERM_BP_DIRECT	GO:0006893~Golgi to plasma membrane transport	2	2.1978	0.0826926	P50570, Q9Y6D5	86	17	16792	22.9713	1	0.942352	71.7296
GOTERM_BP_DIRECT	GO:0001649~osteoblast differentiation	3	3.2967	0.0974862	P41252, P49327, O00622	86	104	16792	5.63238	1	0.95934	77.7167

## Sheet: Top 100 Stabilized GO Terms
Category	Term	Count	%	PValue	Genes	List Total	Pop Hits	Pop Total	Fold Enrichment	Bonferroni	Benjamini	FDR
GOTERM_BP_DIRECT	GO:0098609~cell-cell adhesion	9	10.2273	6.82488e-05	Q9Y570, Q9UPN3, P31947, Q9UQB8, P31946, P43487, Q86W92, Q9Y266, Q15365	86	271	16792	6.48451	0.0380248	0.0380248	0.0999954
GOTERM_BP_DIRECT	GO:0000398~mRNA splicing, via spliceosome	6	6.81818	0.00537781	Q9UNP9, P84103, P11940, P52597, Q15366, Q15365	86	222	16792	5.27718	0.953245	0.783772	7.59999
GOTERM_BP_DIRECT	GO:1900740~positive regulation of protein insertion into mitochondrial membrane involved in apoptotic signaling pathway	3	3.40909	0.0100477	P27348, P31947, P31946	86	30	16792	19.5256	0.996772	0.852215	13.7594
GOTERM_BP_DIRECT	GO:0061024~membrane organization	3	3.40909	0.0113822	P27348, P31947, P31946	86	32	16792	18.3052	0.9985	0.803194	15.4478
GOTERM_BP_DIRECT	GO:0006457~protein folding	5	5.68182	0.0131887	Q9UNP9, Q02790, Q9Y266, Q13952, P38646	86	180	16792	5.42377	0.999469	0.778692	17.6845
GOTERM_BP_DIRECT	GO:0000082~G1/S transition of mitotic cell cycle	4	4.54545	0.0150012	P23443, P43487, P12004, P50613	86	102	16792	7.65709	0.999813	0.7609	19.8732
GOTERM_BP_DIRECT	GO:0006418~tRNA aminoacylation for protein translation	3	3.40909	0.0174386	P14868, Q15181, P49591	86	40	16792	14.6442	0.999954	0.760093	22.7311
GOTERM_BP_DIRECT	GO:0010467~gene expression	3	3.40909	0.0245718	P52597, Q15366, Q15365	86	48	16792	12.2035	0.999999	0.829051	30.5583
GOTERM_BP_DIRECT	GO:0043066~negative regulation of apoptotic process	7	7.95455	0.02781	Q86XL3, P09211, P23443, P52565, A0A0B4J2C3, E9PK25, P38646	86	455	16792	3.00394	1	0.83136	33.862
GOTERM_BP_DIRECT	GO:0045727~positive regulation of translation	3	3.40909	0.0295351	P11940, P23443, Q5STZ8	86	53	16792	11.0522	1	0.81784	35.5616
GOTERM_BP_DIRECT	GO:0075522~IRES-dependent viral translational initiation	2	2.27273	0.0349061	P05455, Q15366	86	7	16792	55.7874	1	0.840328	40.5962
GOTERM_BP_DIRECT	GO:0039694~viral RNA genome replication	2	2.27273	0.0446562	Q15366, Q15365	86	9	16792	43.3902	1	0.884949	48.8115
GOTERM_BP_DIRECT	GO:0007010~cytoskeleton organization	4	4.54545	0.0483165	Q9UPN3, E9PK25, Q9NZQ3, Q9BUF5	86	161	16792	4.85108	1	0.885108	51.6124
GOTERM_BP_DIRECT	GO:0030855~epithelial cell differentiation	3	3.40909	0.0489983	P00558, Q16762, P12004	86	70	16792	8.36811	1	0.869748	52.118
GOTERM_BP_DIRECT	GO:0007084~mitotic nuclear envelope reassembly	2	2.27273	0.0494947	Q86XL3, P30153	86	10	16792	39.0512	1	0.853711	52.4831
GOTERM_BP_DIRECT	GO:0006283~transcription-coupled nucleotide-excision repair	3	3.40909	0.0541011	Q9UNP9, P12004, P50613	86	74	16792	7.91578	1	0.861169	55.7492
GOTERM_BP_DIRECT	GO:0006271~DNA strand elongation involved in DNA replication	2	2.27273	0.0733262	Q9BRT9, P12004	86	15	16792	26.0341	1	0.921482	67.2509
GOTERM_BP_DIRECT	GO:0006275~regulation of DNA replication	2	2.27273	0.0780212	P30153, P12004	86	16	16792	24.407	1	0.922954	69.6006

## Sheet: RITA 2D TPP
Accession	Gene	Organism	Description	Combined Score	Stabilisation Score	Destabilisation Score	Mean FC	P Value	Effect	Temperature	0	10	50	100	500
P36639	NUDT1	Homo sapiens	7,8-dihydro-8-oxoguanine triphosphatase	0.483333	0.483333	0	1.11633	3.1e-23	Stabilized	42	1	0.969644	1.05324	0.941266	1.07832
P36639	NUDT1	Homo sapiens	7,8-dihydro-8-oxoguanine triphosphatase	0.483333	0.483333	0	1.11633	3.1e-23	Stabilized	44	1	1.01172	0.986949	1.01456	1.0213
P36639	NUDT1	Homo sapiens	7,8-dihydro-8-oxoguanine triphosphatase	0.483333	0.483333	0	1.11633	3.1e-23	Stabilized	46	1	1.04788	1.05552	0.980136	1.04822
P36639	NUDT1	Homo sapiens	7,8-dihydro-8-oxoguanine triphosphatase	0.483333	0.483333	0	1.11633	3.1e-23	Stabilized	48	1	1.02068	1.0506	0.950583	1.00461
P36639	NUDT1	Homo sapiens	7,8-dihydro-8-oxoguanine triphosphatase	0.483333	0.483333	0	1.11633	3.1e-23	Stabilized	50	1	1.11681	1.13402	1.19667	1.21762
P36639	NUDT1	Homo sapiens	7,8-dihydro-8-oxoguanine triphosphatase	0.483333	0.483333	0	1.11633	3.1e-23	Stabilized	52	1	1.01085	1.04383	1.13924	1.21993
P36639	NUDT1	Homo sapiens	7,8-dihydro-8-oxoguanine triphosphatase	0.483333	0.483333	0	1.11633	3.1e-23	Stabilized	54	1	1.02446	1.06379	1.26192	1.28382
P36639	NUDT1	Homo sapiens	7,8-dihydro-8-oxoguanine triphosphatase	0.483333	0.483333	0	1.11633	3.1e-23	Stabilized	56	1	1.12275	1.25036	1.65806	1.84284
P36639	NUDT1	Homo sapiens	7,8-dihydro-8-oxoguanine triphosphatase	0.483333	0.483333	0	1.11633	3.1e-23	Stabilized	58	1	1.01086	1.00539	1.37908	1.5213
P36639	NUDT1	Homo sapiens	7,8-dihydro-8-oxoguanine triphosphatase	0.483333	0.483333	0	1.11633	3.1e-23	Stabilized	60	1	0.982441	1.04846	1.23388	1.39363
P36639	NUDT1	Homo sapiens	7,8-dihydro-8-oxoguanine triphosphatase	0.483333	0.483333	0	1.11633	3.1e-23	Stabilized	62	1	1.13487	0.916724	1.50251	1.67538
P36639	NUDT1	Homo sapiens	7,8-dihydro-8-oxoguanine triphosphatase	0.483333	0.483333	0	1.11633	3.1e-23	Stabilized	64	1	0.976629	0.986099	1.23334	1.15676
P09960	LTA4H	Homo sapiens	Leukotriene A-4 hydrolase	0.416667	0.416667	0	1.11079	3.1e-23	Stabilized	42	1	1.16756	1.00322	0.983772	1.16564
P09960	LTA4H	Homo sapiens	Leukotriene A-4 hydrolase	0.416667	0.416667	0	1.11079	3.1e-23	Stabilized	44	1	1.202	1.00939	1.14533	1.15728
P09960	LTA4H	Homo sapiens	Leukotriene A-4 hydrolase	0.416667	0.416667	0	1.11079	3.1e-23	Stabilized	46	1	1.21321	0.993787	1.21678	1.13952
P09960	LTA4H	Homo sapiens	Leukotriene A-4 hydrolase	0.416667	0.416667	0	1.11079	3.1e-23	Stabilized	48	1	1.13555	1.05002	1.02653	1.04278
P09960	LTA4H	Homo sapiens	Leukotriene A-4 hydrolase	0.416667	0.416667	0	1.11079	3.1e-23	Stabilized	50	1	1.05166	1.05542	1.06991	1.1188
P09960	LTA4H	Homo sapiens	Leukotriene A-4 hydrolase	0.416667	0.416667	0	1.11079	3.1e-23	Stabilized	52	1	1.03477	1.06237	1.08783	1.12036
P09960	LTA4H	Homo sapiens	Leukotriene A-4 hydrolase	0.416667	0.416667	0	1.11079	3.1e-23	Stabilized	54	1	1.02255	1.0529	1.17285	1.24692
P09960	LTA4H	Homo sapiens	Leukotriene A-4 hydrolase	0.416667	0.416667	0	1.11079	3.1e-23	Stabilized	56	1	0.968212	1.24964	1.66778	1.71467
P09960	LTA4H	Homo sapiens	Leukotriene A-4 hydrolase	0.416667	0.416667	0	1.11079	3.1e-23	Stabilized	58	1	1.09889	1.07835	1.34453	1.40873
P09960	LTA4H	Homo sapiens	Leukotriene A-4 hydrolase	0.416667	0.416667	0	1.11079	3.1e-23	Stabilized	60	1	0.909661	0.916348	1.28495	1.38299
P09960	LTA4H	Homo sapiens	Leukotriene A-4 hydrolase	0.416667	0.416667	0	1.11079	3.1e-23	Stabilized	62	1	1.00681	0.958561	1.25847	1.31461
P09960	LTA4H	Homo sapiens	Leukotriene A-4 hydrolase	0.416667	0.416667	0	1.11079	3.1e-23	Stabilized	64	1	0.944236	0.980299	1.18957	1.2212
Q9H4G4	GLIPR2	Homo sapiens	Golgi-associated plant pathogenesis-related protein 1	0.366667	0.366667	0	1.10892	3.1e-23	Stabilized	42	1	0.968151	1.09388	1.18004	1.4257
Q9H4G4	GLIPR2	Homo sapiens	Golgi-associated plant pathogenesis-related protein 1	0.366667	0.366667	0	1.10892	3.1e-23	Stabilized	44	1	1.18968	1.20819	1.35197	1.41445
Q9H4G4	GLIPR2	Homo sapiens	Golgi-associated plant pathogenesis-related protein 1	0.366667	0.366667	0	1.10892	3.1e-23	Stabilized	46	1	0.946168	1.05541	1.22918	1.49962
Q9H4G4	GLIPR2	Homo sapiens	Golgi-associated plant pathogenesis-related protein 1	0.366667	0.366667	0	1.10892	3.1e-23	Stabilized	48	1	1.04254	1.29705	1.3386	1.65214
Q9H4G4	GLIPR2	Homo sapiens	Golgi-associated plant pathogenesis-related protein 1	0.366667	0.366667	0	1.10892	3.1e-23	Stabilized	50	1	1.03052	1.27794	1.2123	1.33303
Q9H4G4	GLIPR2	Homo sapiens	Golgi-associated plant pathogenesis-related protein 1	0.366667	0.366667	0	1.10892	3.1e-23	Stabilized	52	1	1.18676	1.06842	1.21452	1.30193
Q9H4G4	GLIPR2	Homo sapiens	Golgi-associated plant pathogenesis-related protein 1	0.366667	0.366667	0	1.10892	3.1e-23	Stabilized	54	1	0.844709	0.885622	0.940531	0.954634
Q9H4G4	GLIPR2	Homo sapiens	Golgi-associated plant pathogenesis-related protein 1	0.366667	0.366667	0	1.10892	3.1e-23	Stabilized	56	1	0.878158	0.792862	0.893627	1.13976
Q9H4G4	GLIPR2	Homo sapiens	Golgi-associated plant pathogenesis-related protein 1	0.366667	0.366667	0	1.10892	3.1e-23	Stabilized	58	1	0.996787	1.06075	0.918169	0.988938
Q9H4G4	GLIPR2	Homo sapiens	Golgi-associated plant pathogenesis-related protein 1	0.366667	0.366667	0	1.10892	3.1e-23	Stabilized	60	1	1.15904	1.45976	1.45203	1.19461
Q9H4G4	GLIPR2	Homo sapiens	Golgi-associated plant pathogenesis-related protein 1	0.366667	0.366667	0	1.10892	3.1e-23	Stabilized	62	1	1.22116	1.15663	0.962221	0.943211
Q9H4G4	GLIPR2	Homo sapiens	Golgi-associated plant pathogenesis-related protein 1	0.366667	0.366667	0	1.10892	3.1e-23	Stabilized	64	1	1.06131	1.11501	1.02479	0.972933
P62316	SNRPD2	Homo sapiens	Small nuclear ribonucleoprotein Sm D2	0.333333	0.333333	0	1.08535	2.22045e-16	Stabilized	42	1	1.16638	1.13609	1.19382	1.24429
P62316	SNRPD2	Homo sapiens	Small nuclear ribonucleoprotein Sm D2	0.333333	0.333333	0	1.08535	2.22045e-16	Stabilized	44	1	1.28037	0.975878	1.51503	1.30367
P62316	SNRPD2	Homo sapiens	Small nuclear ribonucleoprotein Sm D2	0.333333	0.333333	0	1.08535	2.22045e-16	Stabilized	46	1	1.51335	1.09207	1.67992	1.64776
P62316	SNRPD2	Homo sapiens	Small nuclear ribonucleoprotein Sm D2	0.333333	0.333333	0	1.08535	2.22045e-16	Stabilized	48	1	1.04597	1.1961	1.25494	1.31471
P62316	SNRPD2	Homo sapiens	Small nuclear ribonucleoprotein Sm D2	0.333333	0.333333	0	1.08535	2.22045e-16	Stabilized	50	1	1.00735	1.10028	1.15656	1.17072
P62316	SNRPD2	Homo sapiens	Small nuclear ribonucleoprotein Sm D2	0.333333	0.333333	0	1.08535	2.22045e-16	Stabilized	52	1	1.09693	1.12024	1.11408	1.11264
P62316	SNRPD2	Homo sapiens	Small nuclear ribonucleoprotein Sm D2	0.333333	0.333333	0	1.08535	2.22045e-16	Stabilized	54	1	0.9038	1.03239	1.00677	1.02342
P62316	SNRPD2	Homo sapiens	Small nuclear ribonucleoprotein Sm D2	0.333333	0.333333	0	1.08535	2.22045e-16	Stabilized	56	1	0.976987	0.972682	0.93782	1.06291
P62316	SNRPD2	Homo sapiens	Small nuclear ribonucleoprotein Sm D2	0.333333	0.333333	0	1.08535	2.22045e-16	Stabilized	58	1	1.03397	1.16545	0.973297	1.0337
P62316	SNRPD2	Homo sapiens	Small nuclear ribonucleoprotein Sm D2	0.333333	0.333333	0	1.08535	2.22045e-16	Stabilized	60	1	1.04261	1.02511	0.877272	1.03328
P62316	SNRPD2	Homo sapiens	Small nuclear ribonucleoprotein Sm D2	0.333333	0.333333	0	1.08535	2.22045e-16	Stabilized	62	1	1.12311	1.02067	0.896195	0.819242
P62316	SNRPD2	Homo sapiens	Small nuclear ribonucleoprotein Sm D2	0.333333	0.333333	0	1.08535	2.22045e-16	Stabilized	64	1	1.00825	1.08718	0.813146	0.812481
Q07666	KHDRBS1	Homo sapiens	KH domain-containing, RNA-binding, signal transduction-associated protein 1	0.316667	0.316667	0	1.18554	3.77476e-15	Stabilized	42	1	1.41004	1.2556	1.24654	1.26635
Q07666	KHDRBS1	Homo sapiens	KH domain-containing, RNA-binding, signal transduction-associated protein 1	0.316667	0.316667	0	1.18554	3.77476e-15	Stabilized	44	1	1.41883	0.890644	1.83564	1.4333
Q07666	KHDRBS1	Homo sapiens	KH domain-containing, RNA-binding, signal transduction-associated protein 1	0.316667	0.316667	0	1.18554	3.77476e-15	Stabilized	46	1	1.64238	1.73343	1.75875	1.93058
Q07666	KHDRBS1	Homo sapiens	KH domain-containing, RNA-binding, signal transduction-associated protein 1	0.316667	0.316667	0	1.18554	3.77476e-15	Stabilized	48	1	1.0892	1.19866	1.04345	1.19358
Q07666	KHDRBS1	Homo sapiens	KH domain-containing, RNA-binding, signal transduction-associated protein 1	0.316667	0.316667	0	1.18554	3.77476e-15	Stabilized	50	1	1.09078	1.24085	1.01123	1.16475
Q07666	KHDRBS1	Homo sapiens	KH domain-containing, RNA-binding, signal transduction-associated protein 1	0.316667	0.316667	0	1.18554	3.77476e-15	Stabilized	52	1	1.12239	1.25159	1.12181	1.15883
Q07666	KHDRBS1	Homo sapiens	KH domain-containing, RNA-binding, signal transduction-associated protein 1	0.316667	0.316667	0	1.18554	3.77476e-15	Stabilized	54	1	0.990541	1.05828	0.989783	1.12411
Q07666	KHDRBS1	Homo sapiens	KH domain-containing, RNA-binding, signal transduction-associated protein 1	0.316667	0.316667	0	1.18554	3.77476e-15	Stabilized	56	1	1.09786	1.19408	1.08189	1.19623
Q07666	KHDRBS1	Homo sapiens	KH domain-containing, RNA-binding, signal transduction-associated protein 1	0.316667	0.316667	0	1.18554	3.77476e-15	Stabilized	58	1	1.13116	0.955502	1.37088	1.43389
Q07666	KHDRBS1	Homo sapiens	KH domain-containing, RNA-binding, signal transduction-associated protein 1	0.316667	0.316667	0	1.18554	3.77476e-15	Stabilized	60	1	0.957356	0.950809	1.1973	1.28934
Q07666	KHDRBS1	Homo sapiens	KH domain-containing, RNA-binding, signal transduction-associated protein 1	0.316667	0.316667	0	1.18554	3.77476e-15	Stabilized	62	1	1.0438	1.02533	1.40628	1.52793
Q07666	KHDRBS1	Homo sapiens	KH domain-containing, RNA-binding, signal transduction-associated protein 1	0.316667	0.316667	0	1.18554	3.77476e-15	Stabilized	64	1	1.03794	0.907115	1.22495	1.43111
E9PNQ8	THY1	Homo sapiens	Thy-1 membrane glycoprotein (Fragment)	0.316667	0.316667	0	1.1072	3.77476e-15	Stabilized	42	1	0.948207	1.07773	1.08492	1.42197
E9PNQ8	THY1	Homo sapiens	Thy-1 membrane glycoprotein (Fragment)	0.316667	0.316667	0	1.1072	3.77476e-15	Stabilized	44	1	1.24412	1.11001	1.25737	1.68525
E9PNQ8	THY1	Homo sapiens	Thy-1 membrane glycoprotein (Fragment)	0.316667	0.316667	0	1.1072	3.77476e-15	Stabilized	46	1	1.03603	1.02048	1.21658	1.60847
E9PNQ8	THY1	Homo sapiens	Thy-1 membrane glycoprotein (Fragment)	0.316667	0.316667	0	1.1072	3.77476e-15	Stabilized	48	1	1.12597	1.24329	1.2855	1.51021
E9PNQ8	THY1	Homo sapiens	Thy-1 membrane glycoprotein (Fragment)	0.316667	0.316667	0	1.1072	3.77476e-15	Stabilized	50	1	1.07679	1.21483	1.12048	1.45731
E9PNQ8	THY1	Homo sapiens	Thy-1 membrane glycoprotein (Fragment)	0.316667	0.316667	0	1.1072	3.77476e-15	Stabilized	52	1	1.13359	1.16842	1.36248	1.49926
E9PNQ8	THY1	Homo sapiens	Thy-1 membrane glycoprotein (Fragment)	0.316667	0.316667	0	1.1072	3.77476e-15	Stabilized	54	1	0.723728	0.898281	0.936822	1.14618
E9PNQ8	THY1	Homo sapiens	Thy-1 membrane glycoprotein (Fragment)	0.316667	0.316667	0	1.1072	3.77476e-15	Stabilized	56	1	0.979157	0.956337	1.08487	1.29022
E9PNQ8	THY1	Homo sapiens	Thy-1 membrane glycoprotein (Fragment)	0.316667	0.316667	0	1.1072	3.77476e-15	Stabilized	58	1	0.901112	1.24729	1.06434	1.26717
E9PNQ8	THY1	Homo sapiens	Thy-1 membrane glycoprotein (Fragment)	0.316667	0.316667	0	1.1072	3.77476e-15	Stabilized	60	1	1.0713	1.01731	1.02994	1.23472
E9PNQ8	THY1	Homo sapiens	Thy-1 membrane glycoprotein (Fragment)	0.316667	0.316667	0	1.1072	3.77476e-15	Stabilized	62	1	0.982699	1.01946	0.871103	0.933517
E9PNQ8	THY1	Homo sapiens	Thy-1 membrane glycoprotein (Fragment)	0.316667	0.316667	0	1.1072	3.77476e-15	Stabilized	64	1	1.00349	1.11336	0.914154	0.835925
P04843	RPN1	Homo sapiens	Dolichyl-diphosphooligosaccharide--protein glycosyltransferase subunit 1	0.316667	0.316667	0	1.09336	3.77476e-15	Stabilized	42	1	1.35889	0.967079	1.0806	1.09734
P04843	RPN1	Homo sapiens	Dolichyl-diphosphooligosaccharide--protein glycosyltransferase subunit 1	0.316667	0.316667	0	1.09336	3.77476e-15	Stabilized	44	1	1.51908	1.0051	0.967438	1.34308
P04843	RPN1	Homo sapiens	Dolichyl-diphosphooligosaccharide--protein glycosyltransferase subunit 1	0.316667	0.316667	0	1.09336	3.77476e-15	Stabilized	46	1	1.65153	1.06805	1.05209	1.37973
P04843	RPN1	Homo sapiens	Dolichyl-diphosphooligosaccharide--protein glycosyltransferase subunit 1	0.316667	0.316667	0	1.09336	3.77476e-15	Stabilized	48	1	1.18773	1.07028	1.12843	1.10214
P04843	RPN1	Homo sapiens	Dolichyl-diphosphooligosaccharide--protein glycosyltransferase subunit 1	0.316667	0.316667	0	1.09336	3.77476e-15	Stabilized	50	1	1.12268	1.10901	1.10083	1.20511
P04843	RPN1	Homo sapiens	Dolichyl-diphosphooligosaccharide--protein glycosyltransferase subunit 1	0.316667	0.316667	0	1.09336	3.77476e-15	Stabilized	52	1	1.03294	1.04343	1.01685	0.987137
P04843	RPN1	Homo sapiens	Dolichyl-diphosphooligosaccharide--protein glycosyltransferase subunit 1	0.316667	0.316667	0	1.09336	3.77476e-15	Stabilized	54	1	1.00482	0.991246	0.966917	1.03793
P04843	RPN1	Homo sapiens	Dolichyl-diphosphooligosaccharide--protein glycosyltransferase subunit 1	0.316667	0.316667	0	1.09336	3.77476e-15	Stabilized	56	1	0.966002	1.10004	1.05621	1.14592
P04843	RPN1	Homo sapiens	Dolichyl-diphosphooligosaccharide--protein glycosyltransferase subunit 1	0.316667	0.316667	0	1.09336	3.77476e-15	Stabilized	58	1	1.08454	0.978894	1.07006	1.23499
P04843	RPN1	Homo sapiens	Dolichyl-diphosphooligosaccharide--protein glycosyltransferase subunit 1	0.316667	0.316667	0	1.09336	3.77476e-15	Stabilized	60	1	0.806368	0.819975	1.03707	1.1224
P04843	RPN1	Homo sapiens	Dolichyl-diphosphooligosaccharide--protein glycosyltransferase subunit 1	0.316667	0.316667	0	1.09336	3.77476e-15	Stabilized	62	1	1.13071	0.968092	1.40178	1.41071
P04843	RPN1	Homo sapiens	Dolichyl-diphosphooligosaccharide--protein glycosyltransferase subunit 1	0.316667	0.316667	0	1.09336	3.77476e-15	Stabilized	64	1	1.11625	1.05597	1.24603	1.25184
Q15369	ELOC	Homo sapiens	Elongin-C	0.3	0.3	0	1.11607	9.30367e-14	Stabilized	42	1	1.13991	1.03837	1.03813	1.1428
Q15369	ELOC	Homo sapiens	Elongin-C	0.3	0.3	0	1.11607	9.30367e-14	Stabilized	44	1	1.04564	1.01617	1.01357	0.989776
Q15369	ELOC	Homo sapiens	Elongin-C	0.3	0.3	0	1.11607	9.30367e-14	Stabilized	46	1	1.05744	1.00997	1.01772	1.00533
Q15369	ELOC	Homo sapiens	Elongin-C	0.3	0.3	0	1.11607	9.30367e-14	Stabilized	48	1	1.08134	0.97783	1.02416	0.98209
Q15369	ELOC	Homo sapiens	Elongin-C	0.3	0.3	0	1.11607	9.30367e-14	Stabilized	50	1	1.09818	1.03026	1.08016	1.0385
Q15369	ELOC	Homo sapiens	Elongin-C	0.3	0.3	0	1.11607	9.30367e-14	Stabilized	52	1	1.03786	0.992176	0.999089	0.94472
Q15369	ELOC	Homo sapiens	Elongin-C	0.3	0.3	0	1.11607	9.30367e-14	Stabilized	54	1	1.07664	1.0146	0.939568	0.944838
Q15369	ELOC	Homo sapiens	Elongin-C	0.3	0.3	0	1.11607	9.30367e-14	Stabilized	56	1	1.03521	1.03611	1.0344	1.0064
Q15369	ELOC	Homo sapiens	Elongin-C	0.3	0.3	0	1.11607	9.30367e-14	Stabilized	58	1	1.10007	1.10023	1.12861	1.25058
Q15369	ELOC	Homo sapiens	Elongin-C	0.3	0.3	0	1.11607	9.30367e-14	Stabilized	60	1	0.927991	0.905433	1.61627	1.81444
Q15369	ELOC	Homo sapiens	Elongin-C	0.3	0.3	0	1.11607	9.30367e-14	Stabilized	62	1	1.11449	1.03886	1.76868	2.16216
Q15369	ELOC	Homo sapiens	Elongin-C	0.3	0.3	0	1.11607	9.30367e-14	Stabilized	64	1	1.01866	1.03109	1.93085	2.1665
Q00839-2	HNRNPU	Homo sapiens	Isoform 2 of Heterogeneous nuclear ribonucleoprotein U	0.283333	0.283333	0	1.40392	1.96887e-12	Solubility/Expression	42	1	4.79556	4.28543	4.1017	4.60853
Q00839-2	HNRNPU	Homo sapiens	Isoform 2 of Heterogeneous nuclear ribonucleoprotein U	0.283333	0.283333	0	1.40392	1.96887e-12	Solubility/Expression	44	1	2.27837	1.38056	3.12952	1.70064
Q00839-2	HNRNPU	Homo sapiens	Isoform 2 of Heterogeneous nuclear ribonucleoprotein U	0.283333	0.283333	0	1.40392	1.96887e-12	Solubility/Expression	46	1	1.14973	1.2036	1.07539	1.07309
Q00839-2	HNRNPU	Homo sapiens	Isoform 2 of Heterogeneous nuclear ribonucleoprotein U	0.283333	0.283333	0	1.40392	1.96887e-12	Solubility/Expression	48	1	1.12659	1.67179	1.44117	1.9696
Q00839-2	HNRNPU	Homo sapiens	Isoform 2 of Heterogeneous nuclear ribonucleoprotein U	0.283333	0.283333	0	1.40392	1.96887e-12	Solubility/Expression	50	1	0.961421	1.10486	0.882832	0.760066
Q00839-2	HNRNPU	Homo sapiens	Isoform 2 of Heterogeneous nuclear ribonucleoprotein U	0.283333	0.283333	0	1.40392	1.96887e-12	Solubility/Expression	52	1	1.06968	1.06977	1.0699	1.05137
Q00839-2	HNRNPU	Homo sapiens	Isoform 2 of Heterogeneous nuclear ribonucleoprotein U	0.283333	0.283333	0	1.40392	1.96887e-12	Solubility/Expression	54	1	0.980549	1.07375	0.831187	0.703189
Q00839-2	HNRNPU	Homo sapiens	Isoform 2 of Heterogeneous nuclear ribonucleoprotein U	0.283333	0.283333	0	1.40392	1.96887e-12	Solubility/Expression	56	1	1.08232	1.09743	0.809854	0.722
Q00839-2	HNRNPU	Homo sapiens	Isoform 2 of Heterogeneous nuclear ribonucleoprotein U	0.283333	0.283333	0	1.40392	1.96887e-12	Solubility/Expression	58	1	1.11448	1.13667	1.11554	0.85413
Q00839-2	HNRNPU	Homo sapiens	Isoform 2 of Heterogeneous nuclear ribonucleoprotein U	0.283333	0.283333	0	1.40392	1.96887e-12	Solubility/Expression	60	1	1.38879	1.39252	0.916908	1.03613
Q00839-2	HNRNPU	Homo sapiens	Isoform 2 of Heterogeneous nuclear ribonucleoprotein U	0.283333	0.283333	0	1.40392	1.96887e-12	Solubility/Expression	62	1	1.72293	1.56986	1.12104	1.94963
Q00839-2	HNRNPU	Homo sapiens	Isoform 2 of Heterogeneous nuclear ribonucleoprotein U	0.283333	0.283333	0	1.40392	1.96887e-12	Solubility/Expression	64	1	1.1526	1.17356	0.918043	1.41075
P30043	BLVRB	Homo sapiens	Flavin reductase (NADPH)	0.283333	0.283333	0	1.37155	1.96887e-12	Solubility/Expression	42	1	2.03509	0.930683	0.94241	1.56825
P30043	BLVRB	Homo sapiens	Flavin reductase (NADPH)	0.283333	0.283333	0	1.37155	1.96887e-12	Solubility/Expression	44	1	2.26399	0.956118	0.967176	1.56783
P30043	BLVRB	Homo sapiens	Flavin reductase (NADPH)	0.283333	0.283333	0	1.37155	1.96887e-12	Solubility/Expression	46	1	1.05511	1.00427	1.04341	1.03821
P30043	BLVRB	Homo sapiens	Flavin reductase (NADPH)	0.283333	0.283333	0	1.37155	1.96887e-12	Solubility/Expression	48	1	2.87706	0.962818	1.0449	2.05783
P30043	BLVRB	Homo sapiens	Flavin reductase (NADPH)	0.283333	0.283333	0	1.37155	1.96887e-12	Solubility/Expression	50	1	1.49281	1.26889	1.636	1.70906
P30043	BLVRB	Homo sapiens	Flavin reductase (NADPH)	0.283333	0.283333	0	1.37155	1.96887e-12	Solubility/Expression	52	1	0.887679	0.856791	1.39487	1.37061
P30043	BLVRB	Homo sapiens	Flavin reductase (NADPH)	0.283333	0.283333	0	1.37155	1.96887e-12	Solubility/Expression	54	1	1.07047	1.33249	1.76965	1.77204
P30043	BLVRB	Homo sapiens	Flavin reductase (NADPH)	0.283333	0.283333	0	1.37155	1.96887e-12	Solubility/Expression	56	1	1.17875	1.37556	2.27102	2.0151
P30043	BLVRB	Homo sapiens	Flavin reductase (NADPH)	0.283333	0.283333	0	1.37155	1.96887e-12	Solubility/Expression	58	1	1.07684	1.26819	1.77058	1.74669
P30043	BLVRB	Homo sapiens	Flavin reductase (NADPH)	0.283333	0.283333	0	1.37155	1.96887e-12	Solubility/Expression	60	1	1.0544	1.28639	1.73814	1.69614
P30043	BLVRB	Homo sapiens	Flavin reductase (NADPH)	0.283333	0.283333	0	1.37155	1.96887e-12	Solubility/Expression	62	1	1.25164	1.31116	2.1826	2.29778
P30043	BLVRB	Homo sapiens	Flavin reductase (NADPH)	0.283333	0.283333	0	1.37155	1.96887e-12	Solubility/Expression	64	1	0.98109	1.11668	1.8404	1.9573
P31947	SFN	Homo sapiens	14-3-3 protein sigma	0.283333	0.283333	0	1.1552	1.96887e-12	Solubility/Expression	42	1	1.72979	0.979755	1.07399	1.49356
P31947	SFN	Homo sapiens	14-3-3 protein sigma	0.283333	0.283333	0	1.1552	1.96887e-12	Solubility/Expression	44	1	2.1667	1.17357	1.13816	1.84205
P31947	SFN	Homo sapiens	14-3-3 protein sigma	0.283333	0.283333	0	1.1552	1.96887e-12	Solubility/Expression	46	1	1.62218	1.19421	1.15252	1.62424
P31947	SFN	Homo sapiens	14-3-3 protein sigma	0.283333	0.283333	0	1.1552	1.96887e-12	Solubility/Expression	48	1	1.76201	1.07538	1.27839	1.59824
P31947	SFN	Homo sapiens	14-3-3 protein sigma	0.283333	0.283333	0	1.1552	1.96887e-12	Solubility/Expression	50	1	1.08399	1.16021	1.25558	1.2862
P31947	SFN	Homo sapiens	14-3-3 protein sigma	0.283333	0.283333	0	1.1552	1.96887e-12	Solubility/Expression	52	1	1.05826	1.12459	1.19446	1.24268
P31947	SFN	Homo sapiens	14-3-3 protein sigma	0.283333	0.283333	0	1.1552	1.96887e-12	Solubility/Expression	54	1	0.988697	1.02447	0.948078	0.973152
P31947	SFN	Homo sapiens	14-3-3 protein sigma	0.283333	0.283333	0	1.1552	1.96887e-12	Solubility/Expression	56	1	1.00698	1.06697	0.976276	0.967732
P31947	SFN	Homo sapiens	14-3-3 protein sigma	0.283333	0.283333	0	1.1552	1.96887e-12	Solubility/Expression	58	1	1.038	1.03221	0.902583	0.934909
P31947	SFN	Homo sapiens	14-3-3 protein sigma	0.283333	0.283333	0	1.1552	1.96887e-12	Solubility/Expression	60	1	0.891978	0.946218	0.933614	1.00881
P31947	SFN	Homo sapiens	14-3-3 protein sigma	0.283333	0.283333	0	1.1552	1.96887e-12	Solubility/Expression	62	1	1.15279	1.01375	1.32526	1.37631
P31947	SFN	Homo sapiens	14-3-3 protein sigma	0.283333	0.283333	0	1.1552	1.96887e-12	Solubility/Expression	64	1	1.04591	1.02222	1.18978	1.23478
P12004	PCNA	Homo sapiens	Proliferating cell nuclear antigen	0.283333	0.283333	0	1.11311	1.96887e-12	Solubility/Expression	42	1	1.81356	0.881457	0.968132	1.49427
P12004	PCNA	Homo sapiens	Proliferating cell nuclear antigen	0.283333	0.283333	0	1.11311	1.96887e-12	Solubility/Expression	44	1	2.06861	1.09873	1.09646	1.82907
P12004	PCNA	Homo sapiens	Proliferating cell nuclear antigen	0.283333	0.283333	0	1.11311	1.96887e-12	Solubility/Expression	46	1	1.46012	1.02274	1.0063	1.5109
P12004	PCNA	Homo sapiens	Proliferating cell nuclear antigen	0.283333	0.283333	0	1.11311	1.96887e-12	Solubility/Expression	48	1	1.36001	1.03535	0.97034	1.17746
P12004	PCNA	Homo sapiens	Proliferating cell nuclear antigen	0.283333	0.283333	0	1.11311	1.96887e-12	Solubility/Expression	50	1	1.21591	1.17619	1.14296	1.27177
P12004	PCNA	Homo sapiens	Proliferating cell nuclear antigen	0.283333	0.283333	0	1.11311	1.96887e-12	Solubility/Expression	52	1	1.03943	1.04373	0.991177	1.069
P12004	PCNA	Homo sapiens	Proliferating cell nuclear antigen	0.283333	0.283333	0	1.11311	1.96887e-12	Solubility/Expression	54	1	0.987128	1.0568	0.884914	1.01769
P12004	PCNA	Homo sapiens	Proliferating cell nuclear antigen	0.283333	0.283333	0	1.11311	1.96887e-12	Solubility/Expression	56	1	1.02269	1.07055	0.992406	1.06437
P12004	PCNA	Homo sapiens	Proliferating cell nuclear antigen	0.283333	0.283333	0	1.11311	1.96887e-12	Solubility/Expression	58	1	1.00546	1.06651	0.879347	0.997464
P12004	PCNA	Homo sapiens	Proliferating cell nuclear antigen	0.283333	0.283333	0	1.11311	1.96887e-12	Solubility/Expression	60	1	0.98208	1.04641	0.863483	1.00309
P12004	PCNA	Homo sapiens	Proliferating cell nuclear antigen	0.283333	0.283333	0	1.11311	1.96887e-12	Solubility/Expression	62	1	1.24409	1.18018	1.10017	1.18937
P12004	PCNA	Homo sapiens	Proliferating cell nuclear antigen	0.283333	0.283333	0	1.11311	1.96887e-12	Solubility/Expression	64	1	1.05997	1.1023	1.07451	1.15201
P35270	SPR	Homo sapiens	Sepiapterin reductase	0.283333	0.283333	0	1.11289	1.96887e-12	Stabilized	42	1	0.974187	0.994937	0.976519	0.943473
P35270	SPR	Homo sapiens	Sepiapterin reductase	0.283333	0.283333	0	1.11289	1.96887e-12	Stabilized	44	1	1.01969	0.990228	0.982701	0.995422
P35270	SPR	Homo sapiens	Sepiapterin reductase	0.283333	0.283333	0	1.11289	1.96887e-12	Stabilized	46	1	1.04061	1.0206	1.04871	0.98954
P35270	SPR	Homo sapiens	Sepiapterin reductase	0.283333	0.283333	0	1.11289	1.96887e-12	Stabilized	48	1	1.00303	0.98349	0.969477	0.971225
P35270	SPR	Homo sapiens	Sepiapterin reductase	0.283333	0.283333	0	1.11289	1.96887e-12	Stabilized	50	1	1.03254	1.07087	1.12538	1.1157
P35270	SPR	Homo sapiens	Sepiapterin reductase	0.283333	0.283333	0	1.11289	1.96887e-12	Stabilized	52	1	1.0479	1.02758	1.1212	1.14183
P35270	SPR	Homo sapiens	Sepiapterin reductase	0.283333	0.283333	0	1.11289	1.96887e-12	Stabilized	54	1	1.01397	1.04688	1.21889	1.30269
P35270	SPR	Homo sapiens	Sepiapterin reductase	0.283333	0.283333	0	1.11289	1.96887e-12	Stabilized	56	1	1.0132	1.12775	1.45059	1.55866
P35270	SPR	Homo sapiens	Sepiapterin reductase	0.283333	0.283333	0	1.11289	1.96887e-12	Stabilized	58	1	1.06847	1.08513	1.51723	1.70591
P35270	SPR	Homo sapiens	Sepiapterin reductase	0.283333	0.283333	0	1.11289	1.96887e-12	Stabilized	60	1	1.00703	1.07021	1.42678	1.44836
P35270	SPR	Homo sapiens	Sepiapterin reductase	0.283333	0.283333	0	1.11289	1.96887e-12	Stabilized	62	1	1.12266	1.1007	1.57187	1.72749
P35270	SPR	Homo sapiens	Sepiapterin reductase	0.283333	0.283333	0	1.11289	1.96887e-12	Stabilized	64	1	0.961722	0.971199	1.30197	1.36731
P23443	RPS6KB1	Homo sapiens	Ribosomal protein S6 kinase beta-1	0.283333	0.283333	0	1.10159	1.96887e-12	Stabilized	42	1	0.942874	0.946287	0.925263	0.955768
P23443	RPS6KB1	Homo sapiens	Ribosomal protein S6 kinase beta-1	0.283333	0.283333	0	1.10159	1.96887e-12	Stabilized	44	1	0.985898	1.03188	0.997926	1.11588
P23443	RPS6KB1	Homo sapiens	Ribosomal protein S6 kinase beta-1	0.283333	0.283333	0	1.10159	1.96887e-12	Stabilized	46	1	0.936568	0.970344	0.933341	0.927488
P23443	RPS6KB1	Homo sapiens	Ribosomal protein S6 kinase beta-1	0.283333	0.283333	0	1.10159	1.96887e-12	Stabilized	48	1	0.961272	1.14303	1.17695	1.24005
P23443	RPS6KB1	Homo sapiens	Ribosomal protein S6 kinase beta-1	0.283333	0.283333	0	1.10159	1.96887e-12	Stabilized	50	1	0.886711	0.874642	0.837031	0.848796
P23443	RPS6KB1	Homo sapiens	Ribosomal protein S6 kinase beta-1	0.283333	0.283333	0	1.10159	1.96887e-12	Stabilized	52	NaN	NaN	NaN	NaN	NaN
P23443	RPS6KB1	Homo sapiens	Ribosomal protein S6 kinase beta-1	0.283333	0.283333	0	1.10159	1.96887e-12	Stabilized	54	1	1.06626	0.99952	1.22996	1.17341
P23443	RPS6KB1	Homo sapiens	Ribosomal protein S6 kinase beta-1	0.283333	0.283333	0	1.10159	1.96887e-12	Stabilized	56	NaN	NaN	NaN	NaN	NaN
P23443	RPS6KB1	Homo sapiens	Ribosomal protein S6 kinase beta-1	0.283333	0.283333	0	1.10159	1.96887e-12	Stabilized	58	1	1.00693	0.873776	1.05625	1.25249
P23443	RPS6KB1	Homo sapiens	Ribosomal protein S6 kinase beta-1	0.283333	0.283333	0	1.10159	1.96887e-12	Stabilized	60	1	1.33906	1.77528	2.17804	2.83576
P23443	RPS6KB1	Homo sapiens	Ribosomal protein S6 kinase beta-1	0.283333	0.283333	0	1.10159	1.96887e-12	Stabilized	62	1	1.10807	1.02138	1.52084	1.60866
P23443	RPS6KB1	Homo sapiens	Ribosomal protein S6 kinase beta-1	0.283333	0.283333	0	1.10159	1.96887e-12	Stabilized	64	1	0.938544	1.02755	1.16654	1.27902
Q9BT22	ALG1	Homo sapiens	Chitobiosyldiphosphodolichol beta-mannosyltransferase	0.283333	0.283333	0	1.08392	1.96887e-12	Stabilized	42	1	0.922427	0.918195	0.938638	0.884569
Q9BT22	ALG1	Homo sapiens	Chitobiosyldiphosphodolichol beta-mannosyltransferase	0.283333	0.283333	0	1.08392	1.96887e-12	Stabilized	44	1	1.03433	1.0708	1.03526	1.08068
Q9BT22	ALG1	Homo sapiens	Chitobiosyldiphosphodolichol beta-mannosyltransferase	0.283333	0.283333	0	1.08392	1.96887e-12	Stabilized	46	1	1.02729	1.01057	1.02635	0.995967
Q9BT22	ALG1	Homo sapiens	Chitobiosyldiphosphodolichol beta-mannosyltransferase	0.283333	0.283333	0	1.08392	1.96887e-12	Stabilized	48	1	1.01455	0.99403	0.956927	1.01559
Q9BT22	ALG1	Homo sapiens	Chitobiosyldiphosphodolichol beta-mannosyltransferase	0.283333	0.283333	0	1.08392	1.96887e-12	Stabilized	50	1	1.06555	1.0568	1.08996	1.09397
Q9BT22	ALG1	Homo sapiens	Chitobiosyldiphosphodolichol beta-mannosyltransferase	0.283333	0.283333	0	1.08392	1.96887e-12	Stabilized	52	1	0.983488	0.980116	0.957427	0.963245
Q9BT22	ALG1	Homo sapiens	Chitobiosyldiphosphodolichol beta-mannosyltransferase	0.283333	0.283333	0	1.08392	1.96887e-12	Stabilized	54	1	0.995114	0.966556	1.03432	1.09882
Q9BT22	ALG1	Homo sapiens	Chitobiosyldiphosphodolichol beta-mannosyltransferase	0.283333	0.283333	0	1.08392	1.96887e-12	Stabilized	56	1	1.05494	1.14527	1.15851	1.27678
Q9BT22	ALG1	Homo sapiens	Chitobiosyldiphosphodolichol beta-mannosyltransferase	0.283333	0.283333	0	1.08392	1.96887e-12	Stabilized	58	1	1.03929	1.05137	1.22734	1.47094
Q9BT22	ALG1	Homo sapiens	Chitobiosyldiphosphodolichol beta-mannosyltransferase	0.283333	0.283333	0	1.08392	1.96887e-12	Stabilized	60	1	0.986992	1.05247	1.54997	1.78631
Q9BT22	ALG1	Homo sapiens	Chitobiosyldiphosphodolichol beta-mannosyltransferase	0.283333	0.283333	0	1.08392	1.96887e-12	Stabilized	62	1	1.02163	0.906542	1.55004	1.61941
Q9BT22	ALG1	Homo sapiens	Chitobiosyldiphosphodolichol beta-mannosyltransferase	0.283333	0.283333	0	1.08392	1.96887e-12	Stabilized	64	1	0.962263	0.75244	1.53903	1.67213
P62253	UBE2G1	Homo sapiens	Ubiquitin-conjugating enzyme E2 G1	0.283333	0.283333	0	1.01637	1.96887e-12	Stabilized	42	1	0.925168	0.980504	0.976356	0.992848
P62253	UBE2G1	Homo sapiens	Ubiquitin-conjugating enzyme E2 G1	0.283333	0.283333	0	1.01637	1.96887e-12	Stabilized	44	1	0.950697	0.997162	0.971935	1.0602
P62253	UBE2G1	Homo sapiens	Ubiquitin-conjugating enzyme E2 G1	0.283333	0.283333	0	1.01637	1.96887e-12	Stabilized	46	1	1.08224	1.18222	0.930216	0.871392
P62253	UBE2G1	Homo sapiens	Ubiquitin-conjugating enzyme E2 G1	0.283333	0.283333	0	1.01637	1.96887e-12	Stabilized	48	1	1.00587	1.01893	0.90778	0.911001
P62253	UBE2G1	Homo sapiens	Ubiquitin-conjugating enzyme E2 G1	0.283333	0.283333	0	1.01637	1.96887e-12	Stabilized	50	1	0.934465	1.06723	1.03404	0.953201
P62253	UBE2G1	Homo sapiens	Ubiquitin-conjugating enzyme E2 G1	0.283333	0.283333	0	1.01637	1.96887e-12	Stabilized	52	1	0.936664	0.954954	0.946397	0.966202
P62253	UBE2G1	Homo sapiens	Ubiquitin-conjugating enzyme E2 G1	0.283333	0.283333	0	1.01637	1.96887e-12	Stabilized	54	1	1.05028	1.05181	0.878447	0.872034
P62253	UBE2G1	Homo sapiens	Ubiquitin-conjugating enzyme E2 G1	0.283333	0.283333	0	1.01637	1.96887e-12	Stabilized	56	1	1.06508	1.11753	0.95864	1.15926
P62253	UBE2G1	Homo sapiens	Ubiquitin-conjugating enzyme E2 G1	0.283333	0.283333	0	1.01637	1.96887e-12	Stabilized	58	1	1.1521	1.16936	1.04409	1.13181
P62253	UBE2G1	Homo sapiens	Ubiquitin-conjugating enzyme E2 G1	0.283333	0.283333	0	1.01637	1.96887e-12	Stabilized	60	1	1.18228	1.21491	1.30907	1.67984
P62253	UBE2G1	Homo sapiens	Ubiquitin-conjugating enzyme E2 G1	0.283333	0.283333	0	1.01637	1.96887e-12	Stabilized	62	1	0.866663	0.82916	0.997486	1.05162
P62253	UBE2G1	Homo sapiens	Ubiquitin-conjugating enzyme E2 G1	0.283333	0.283333	0	1.01637	1.96887e-12	Stabilized	64	1	0.957925	0.860653	0.956573	0.868181
Q9Y266	NUDC	Homo sapiens	Nuclear migration protein nudC	0.266667	0.266667	0	1.17384	3.52289e-11	Stabilized	42	1	1.35866	1.10505	1.35813	1.30041
Q9Y266	NUDC	Homo sapiens	Nuclear migration protein nudC	0.266667	0.266667	0	1.17384	3.52289e-11	Stabilized	44	1	1.39214	0.885682	1.07114	1.41844
Q9Y266	NUDC	Homo sapiens	Nuclear migration protein nudC	0.266667	0.266667	0	1.17384	3.52289e-11	Stabilized	46	1	2.07208	1.11652	1.39408	1.74461
Q9Y266	NUDC	Homo sapiens	Nuclear migration protein nudC	0.266667	0.266667	0	1.17384	3.52289e-11	Stabilized	48	1	1.50909	0.997134	1.12611	1.24666
Q9Y266	NUDC	Homo sapiens	Nuclear migration protein nudC	0.266667	0.266667	0	1.17384	3.52289e-11	Stabilized	50	1	1.06411	1.00833	1.08568	1.07511
Q9Y266	NUDC	Homo sapiens	Nuclear migration protein nudC	0.266667	0.266667	0	1.17384	3.52289e-11	Stabilized	52	1	1.03378	0.972828	1.06171	1.0556
Q9Y266	NUDC	Homo sapiens	Nuclear migration protein nudC	0.266667	0.266667	0	1.17384	3.52289e-11	Stabilized	54	1	1.00515	0.955088	0.997827	1.05698
Q9Y266	NUDC	Homo sapiens	Nuclear migration protein nudC	0.266667	0.266667	0	1.17384	3.52289e-11	Stabilized	56	1	0.994744	1.06319	1.14376	1.25694
Q9Y266	NUDC	Homo sapiens	Nuclear migration protein nudC	0.266667	0.266667	0	1.17384	3.52289e-11	Stabilized	58	1	1.14771	0.900964	1.49645	1.69261
Q9Y266	NUDC	Homo sapiens	Nuclear migration protein nudC	0.266667	0.266667	0	1.17384	3.52289e-11	Stabilized	60	1	0.840314	0.817405	1.54351	1.73596
Q9Y266	NUDC	Homo sapiens	Nuclear migration protein nudC	0.266667	0.266667	0	1.17384	3.52289e-11	Stabilized	62	1	1.09543	0.899913	1.3979	1.50273
Q9Y266	NUDC	Homo sapiens	Nuclear migration protein nudC	0.266667	0.266667	0	1.17384	3.52289e-11	Stabilized	64	1	1.07374	0.87177	1.68994	1.7975
Q9Y2Q3	GSTK1	Homo sapiens	Glutathione S-transferase kappa 1	0.266667	0.266667	0	1.09851	3.52289e-11	Stabilized	42	1	1.13812	1.1535	1.11858	1.1406
Q9Y2Q3	GSTK1	Homo sapiens	Glutathione S-transferase kappa 1	0.266667	0.266667	0	1.09851	3.52289e-11	Stabilized	44	1	0.963854	1.02739	1.00411	0.93622
Q9Y2Q3	GSTK1	Homo sapiens	Glutathione S-transferase kappa 1	0.266667	0.266667	0	1.09851	3.52289e-11	Stabilized	46	1	1.05201	1.16173	1.03804	0.935375
Q9Y2Q3	GSTK1	Homo sapiens	Glutathione S-transferase kappa 1	0.266667	0.266667	0	1.09851	3.52289e-11	Stabilized	48	1	0.980538	0.989389	0.99612	0.975719
Q9Y2Q3	GSTK1	Homo sapiens	Glutathione S-transferase kappa 1	0.266667	0.266667	0	1.09851	3.52289e-11	Stabilized	50	1	0.978441	1.03675	1.02493	0.939769
Q9Y2Q3	GSTK1	Homo sapiens	Glutathione S-transferase kappa 1	0.266667	0.266667	0	1.09851	3.52289e-11	Stabilized	52	1	0.971297	0.891343	1.02778	1.05766
Q9Y2Q3	GSTK1	Homo sapiens	Glutathione S-transferase kappa 1	0.266667	0.266667	0	1.09851	3.52289e-11	Stabilized	54	1	0.931969	0.746739	1.11358	1.11914
Q9Y2Q3	GSTK1	Homo sapiens	Glutathione S-transferase kappa 1	0.266667	0.266667	0	1.09851	3.52289e-11	Stabilized	56	1	0.939856	0.891349	1.27813	1.24698
Q9Y2Q3	GSTK1	Homo sapiens	Glutathione S-transferase kappa 1	0.266667	0.266667	0	1.09851	3.52289e-11	Stabilized	58	1	1.23209	1.00136	1.69266	1.75193
Q9Y2Q3	GSTK1	Homo sapiens	Glutathione S-transferase kappa 1	0.266667	0.266667	0	1.09851	3.52289e-11	Stabilized	60	1	0.902368	0.892542	1.54895	1.79989
Q9Y2Q3	GSTK1	Homo sapiens	Glutathione S-transferase kappa 1	0.266667	0.266667	0	1.09851	3.52289e-11	Stabilized	62	1	1.22652	1.0371	1.69417	1.85215
Q9Y2Q3	GSTK1	Homo sapiens	Glutathione S-transferase kappa 1	0.266667	0.266667	0	1.09851	3.52289e-11	Stabilized	64	1	1.02139	0.990327	1.24434	1.21584
P45983-4	MAPK8	Homo sapiens	Isoform 4 of Mitogen-activated protein kinase 8	0.266667	0.266667	0	1.09745	3.52289e-11	Stabilized	42	1	1.08934	1.04646	1.08323	1.0779
P45983-4	MAPK8	Homo sapiens	Isoform 4 of Mitogen-activated protein kinase 8	0.266667	0.266667	0	1.09745	3.52289e-11	Stabilized	44	1	0.991847	1.00859	1.0864	0.996363
P45983-4	MAPK8	Homo sapiens	Isoform 4 of Mitogen-activated protein kinase 8	0.266667	0.266667	0	1.09745	3.52289e-11	Stabilized	46	1	0.952768	0.962309	1.0187	0.992012
P45983-4	MAPK8	Homo sapiens	Isoform 4 of Mitogen-activated protein kinase 8	0.266667	0.266667	0	1.09745	3.52289e-11	Stabilized	48	1	0.966203	1.00966	1.23992	1.19509
P45983-4	MAPK8	Homo sapiens	Isoform 4 of Mitogen-activated protein kinase 8	0.266667	0.266667	0	1.09745	3.52289e-11	Stabilized	50	1	0.909623	0.868355	1.24593	1.06381
P45983-4	MAPK8	Homo sapiens	Isoform 4 of Mitogen-activated protein kinase 8	0.266667	0.266667	0	1.09745	3.52289e-11	Stabilized	52	1	1.15868	0.828505	1.5261	1.60938
P45983-4	MAPK8	Homo sapiens	Isoform 4 of Mitogen-activated protein kinase 8	0.266667	0.266667	0	1.09745	3.52289e-11	Stabilized	54	1	0.987573	0.946052	1.70409	1.66002
P45983-4	MAPK8	Homo sapiens	Isoform 4 of Mitogen-activated protein kinase 8	0.266667	0.266667	0	1.09745	3.52289e-11	Stabilized	56	1	0.89451	0.936701	1.88835	1.56255
P45983-4	MAPK8	Homo sapiens	Isoform 4 of Mitogen-activated protein kinase 8	0.266667	0.266667	0	1.09745	3.52289e-11	Stabilized	58	1	0.949786	0.964171	1.45258	1.51888
P45983-4	MAPK8	Homo sapiens	Isoform 4 of Mitogen-activated protein kinase 8	0.266667	0.266667	0	1.09745	3.52289e-11	Stabilized	60	1	0.952463	0.742036	1.13544	1.16702
P45983-4	MAPK8	Homo sapiens	Isoform 4 of Mitogen-activated protein kinase 8	0.266667	0.266667	0	1.09745	3.52289e-11	Stabilized	62	1	0.95322	0.875858	1.18619	1.2066
P45983-4	MAPK8	Homo sapiens	Isoform 4 of Mitogen-activated protein kinase 8	0.266667	0.266667	0	1.09745	3.52289e-11	Stabilized	64	1	0.911138	0.853967	1.32529	1.14522
P36507	MAP2K2	Homo sapiens	Dual specificity mitogen-activated protein kinase kinase 2	0.266667	0.266667	0	1.08685	3.52289e-11	Stabilized	42	1	1.04855	1.00639	1.04742	1.02886
P36507	MAP2K2	Homo sapiens	Dual specificity mitogen-activated protein kinase kinase 2	0.266667	0.266667	0	1.08685	3.52289e-11	Stabilized	44	1	1.01267	0.977178	1.01499	1.01683
P36507	MAP2K2	Homo sapiens	Dual specificity mitogen-activated protein kinase kinase 2	0.266667	0.266667	0	1.08685	3.52289e-11	Stabilized	46	1	1.16441	0.949616	1.30256	1.19481
P36507	MAP2K2	Homo sapiens	Dual specificity mitogen-activated protein kinase kinase 2	0.266667	0.266667	0	1.08685	3.52289e-11	Stabilized	48	1	0.977749	0.935911	0.989668	1.00115
P36507	MAP2K2	Homo sapiens	Dual specificity mitogen-activated protein kinase kinase 2	0.266667	0.266667	0	1.08685	3.52289e-11	Stabilized	50	1	1.00211	0.957025	1.03081	1.00182
P36507	MAP2K2	Homo sapiens	Dual specificity mitogen-activated protein kinase kinase 2	0.266667	0.266667	0	1.08685	3.52289e-11	Stabilized	52	1	0.974471	0.897575	1.05148	1.11424
P36507	MAP2K2	Homo sapiens	Dual specificity mitogen-activated protein kinase kinase 2	0.266667	0.266667	0	1.08685	3.52289e-11	Stabilized	54	1	0.963435	0.811036	1.14441	1.18637
P36507	MAP2K2	Homo sapiens	Dual specificity mitogen-activated protein kinase kinase 2	0.266667	0.266667	0	1.08685	3.52289e-11	Stabilized	56	1	0.949418	0.967055	1.25737	1.30713
P36507	MAP2K2	Homo sapiens	Dual specificity mitogen-activated protein kinase kinase 2	0.266667	0.266667	0	1.08685	3.52289e-11	Stabilized	58	1	1.06804	0.874886	1.46451	1.62443
P36507	MAP2K2	Homo sapiens	Dual specificity mitogen-activated protein kinase kinase 2	0.266667	0.266667	0	1.08685	3.52289e-11	Stabilized	60	1	0.829851	0.823883	1.82358	1.85357
P36507	MAP2K2	Homo sapiens	Dual specificity mitogen-activated protein kinase kinase 2	0.266667	0.266667	0	1.08685	3.52289e-11	Stabilized	62	1	1.00536	0.85858	1.52111	1.76054
P36507	MAP2K2	Homo sapiens	Dual specificity mitogen-activated protein kinase kinase 2	0.266667	0.266667	0	1.08685	3.52289e-11	Stabilized	64	1	0.942344	0.955413	1.22954	1.29086
P29034	S100A2	Homo sapiens	Protein S100-A2	0.25	0.25	0	1.63874	5.33018e-10	Solubility/Expression	42	1	8.89125	1.03297	1.19843	5.61758
P29034	S100A2	Homo sapiens	Protein S100-A2	0.25	0.25	0	1.63874	5.33018e-10	Solubility/Expression	44	1	6.53746	0.910826	0.973654	4.30721
P29034	S100A2	Homo sapiens	Protein S100-A2	0.25	0.25	0	1.63874	5.33018e-10	Solubility/Expression	46	1	5.38731	1.09329	1.81257	3.71616
P29034	S100A2	Homo sapiens	Protein S100-A2	0.25	0.25	0	1.63874	5.33018e-10	Solubility/Expression	48	1	2.11518	1.15721	1.92609	1.74256
P29034	S100A2	Homo sapiens	Protein S100-A2	0.25	0.25	0	1.63874	5.33018e-10	Solubility/Expression	50	1	1.57107	1.69751	1.9286	2.55396
P29034	S100A2	Homo sapiens	Protein S100-A2	0.25	0.25	0	1.63874	5.33018e-10	Solubility/Expression	52	1	1.01066	0.965418	1.12813	1.50771
P29034	S100A2	Homo sapiens	Protein S100-A2	0.25	0.25	0	1.63874	5.33018e-10	Solubility/Expression	54	1	1.01435	1.03322	0.948406	1.0447
P29034	S100A2	Homo sapiens	Protein S100-A2	0.25	0.25	0	1.63874	5.33018e-10	Solubility/Expression	56	1	1.01208	1.05528	0.951977	0.999647
P29034	S100A2	Homo sapiens	Protein S100-A2	0.25	0.25	0	1.63874	5.33018e-10	Solubility/Expression	58	1	1.05194	1.05917	0.910118	1.01222
P29034	S100A2	Homo sapiens	Protein S100-A2	0.25	0.25	0	1.63874	5.33018e-10	Solubility/Expression	60	1	0.947201	0.970943	0.99875	1.06305
P29034	S100A2	Homo sapiens	Protein S100-A2	0.25	0.25	0	1.63874	5.33018e-10	Solubility/Expression	62	1	1.20599	1.15564	1.23691	1.28756
P29034	S100A2	Homo sapiens	Protein S100-A2	0.25	0.25	0	1.63874	5.33018e-10	Solubility/Expression	64	1	1.04896	1.19378	1.15023	1.18933
O14579	COPE	Homo sapiens	Coatomer subunit epsilon	0.25	0.25	0	1.18738	5.33018e-10	Stabilized	42	1	1.22941	1.21142	1.24044	1.27161
O14579	COPE	Homo sapiens	Coatomer subunit epsilon	0.25	0.25	0	1.18738	5.33018e-10	Stabilized	44	1	1.00981	1.06463	1.09074	0.978363
O14579	COPE	Homo sapiens	Coatomer subunit epsilon	0.25	0.25	0	1.18738	5.33018e-10	Stabilized	46	1	1.02819	1.08551	0.967147	0.889758
O14579	COPE	Homo sapiens	Coatomer subunit epsilon	0.25	0.25	0	1.18738	5.33018e-10	Stabilized	48	1	0.98467	0.983594	0.981737	0.943548
O14579	COPE	Homo sapiens	Coatomer subunit epsilon	0.25	0.25	0	1.18738	5.33018e-10	Stabilized	50	1	0.951334	0.948771	0.947341	0.940657
O14579	COPE	Homo sapiens	Coatomer subunit epsilon	0.25	0.25	0	1.18738	5.33018e-10	Stabilized	52	1	0.937404	0.906599	1.02221	0.944935
O14579	COPE	Homo sapiens	Coatomer subunit epsilon	0.25	0.25	0	1.18738	5.33018e-10	Stabilized	54	1	0.961535	0.908599	1.09023	1.1185
O14579	COPE	Homo sapiens	Coatomer subunit epsilon	0.25	0.25	0	1.18738	5.33018e-10	Stabilized	56	1	1.00685	1.0477	1.22593	1.32697
O14579	COPE	Homo sapiens	Coatomer subunit epsilon	0.25	0.25	0	1.18738	5.33018e-10	Stabilized	58	1	1.10241	0.840946	2.26396	2.88659
O14579	COPE	Homo sapiens	Coatomer subunit epsilon	0.25	0.25	0	1.18738	5.33018e-10	Stabilized	60	1	1.0717	0.903117	2.93109	3.26605
O14579	COPE	Homo sapiens	Coatomer subunit epsilon	0.25	0.25	0	1.18738	5.33018e-10	Stabilized	62	1	0.970448	0.966097	1.63197	2.04405
O14579	COPE	Homo sapiens	Coatomer subunit epsilon	0.25	0.25	0	1.18738	5.33018e-10	Stabilized	64	1	0.901498	1.00008	1.62759	1.58877
P07355-2	ANXA2	Homo sapiens	Isoform 2 of Annexin A2	0.25	0.25	0	1.1743	5.33018e-10	Stabilized	42	1	1.54656	0.88958	1.11481	1.4264
P07355-2	ANXA2	Homo sapiens	Isoform 2 of Annexin A2	0.25	0.25	0	1.1743	5.33018e-10	Stabilized	44	1	1.64157	1.17291	1.00835	1.59064
P07355-2	ANXA2	Homo sapiens	Isoform 2 of Annexin A2	0.25	0.25	0	1.1743	5.33018e-10	Stabilized	46	1	1.6786	1.03587	1.11132	1.50799
P07355-2	ANXA2	Homo sapiens	Isoform 2 of Annexin A2	0.25	0.25	0	1.1743	5.33018e-10	Stabilized	48	1	1.99674	1.15513	1.18403	1.60149
P07355-2	ANXA2	Homo sapiens	Isoform 2 of Annexin A2	0.25	0.25	0	1.1743	5.33018e-10	Stabilized	50	1	1.15386	1.25075	1.27503	1.43453
P07355-2	ANXA2	Homo sapiens	Isoform 2 of Annexin A2	0.25	0.25	0	1.1743	5.33018e-10	Stabilized	52	1	1.14196	1.06603	1.15578	1.24097
P07355-2	ANXA2	Homo sapiens	Isoform 2 of Annexin A2	0.25	0.25	0	1.1743	5.33018e-10	Stabilized	54	1	0.998801	1.02369	0.957069	1.0399
P07355-2	ANXA2	Homo sapiens	Isoform 2 of Annexin A2	0.25	0.25	0	1.1743	5.33018e-10	Stabilized	56	1	0.925934	1.09293	0.985588	1.09984
P07355-2	ANXA2	Homo sapiens	Isoform 2 of Annexin A2	0.25	0.25	0	1.1743	5.33018e-10	Stabilized	58	1	0.989536	0.948777	1.2037	1.31923
P07355-2	ANXA2	Homo sapiens	Isoform 2 of Annexin A2	0.25	0.25	0	1.1743	5.33018e-10	Stabilized	60	1	0.854594	0.885728	1.40069	1.53389
P07355-2	ANXA2	Homo sapiens	Isoform 2 of Annexin A2	0.25	0.25	0	1.1743	5.33018e-10	Stabilized	62	1	1.15613	0.938454	1.53401	1.55146
P07355-2	ANXA2	Homo sapiens	Isoform 2 of Annexin A2	0.25	0.25	0	1.1743	5.33018e-10	Stabilized	64	1	0.894955	0.869496	1.39649	1.4759
Q5U5X0	LYRM7	Homo sapiens	Complex III assembly factor LYRM7	0.25	0.25	0	1.14641	5.33018e-10	Solubility/Expression	42	1	2.17115	2.3072	2.20336	2.18598
Q5U5X0	LYRM7	Homo sapiens	Complex III assembly factor LYRM7	0.25	0.25	0	1.14641	5.33018e-10	Solubility/Expression	44	1	1.04403	1.13893	1.01191	0.814849
Q5U5X0	LYRM7	Homo sapiens	Complex III assembly factor LYRM7	0.25	0.25	0	1.14641	5.33018e-10	Solubility/Expression	46	1	1.14836	1.46716	0.960543	0.741086
Q5U5X0	LYRM7	Homo sapiens	Complex III assembly factor LYRM7	0.25	0.25	0	1.14641	5.33018e-10	Solubility/Expression	48	1	1.06004	1.07786	0.928098	0.826015
Q5U5X0	LYRM7	Homo sapiens	Complex III assembly factor LYRM7	0.25	0.25	0	1.14641	5.33018e-10	Solubility/Expression	50	1	0.957824	1.01492	0.994356	0.783184
Q5U5X0	LYRM7	Homo sapiens	Complex III assembly factor LYRM7	0.25	0.25	0	1.14641	5.33018e-10	Solubility/Expression	52	1	1.01082	1.22857	1.17409	1.13521
Q5U5X0	LYRM7	Homo sapiens	Complex III assembly factor LYRM7	0.25	0.25	0	1.14641	5.33018e-10	Solubility/Expression	54	1	0.961565	1.09684	0.832222	0.655529
Q5U5X0	LYRM7	Homo sapiens	Complex III assembly factor LYRM7	0.25	0.25	0	1.14641	5.33018e-10	Solubility/Expression	56	1	0.998486	1.14522	1.08157	0.853323
Q5U5X0	LYRM7	Homo sapiens	Complex III assembly factor LYRM7	0.25	0.25	0	1.14641	5.33018e-10	Solubility/Expression	58	1	1.13344	1.1469	0.959467	0.913963
Q5U5X0	LYRM7	Homo sapiens	Complex III assembly factor LYRM7	0.25	0.25	0	1.14641	5.33018e-10	Solubility/Expression	60	1	1.27565	1.27237	1.13283	1.079
Q5U5X0	LYRM7	Homo sapiens	Complex III assembly factor LYRM7	0.25	0.25	0	1.14641	5.33018e-10	Solubility/Expression	62	1	1.97763	2.13748	0.991615	1.60255
Q5U5X0	LYRM7	Homo sapiens	Complex III assembly factor LYRM7	0.25	0.25	0	1.14641	5.33018e-10	Solubility/Expression	64	1	1.12137	1.36851	0.761472	0.899762
P26639	TARS	Homo sapiens	Threonine--tRNA ligase, cytoplasmic	0.25	0.25	0	1.1095	5.33018e-10	Stabilized	42	1	1.13754	1.02667	1.05725	1.08838
P26639	TARS	Homo sapiens	Threonine--tRNA ligase, cytoplasmic	0.25	0.25	0	1.1095	5.33018e-10	Stabilized	44	1	1.19021	0.955302	1.11211	1.11467
P26639	TARS	Homo sapiens	Threonine--tRNA ligase, cytoplasmic	0.25	0.25	0	1.1095	5.33018e-10	Stabilized	46	1	1.40921	0.997282	1.25237	1.3211
P26639	TARS	Homo sapiens	Threonine--tRNA ligase, cytoplasmic	0.25	0.25	0	1.1095	5.33018e-10	Stabilized	48	1	1.10368	1.04294	1.07584	1.02098
P26639	TARS	Homo sapiens	Threonine--tRNA ligase, cytoplasmic	0.25	0.25	0	1.1095	5.33018e-10	Stabilized	50	1	1.12259	1.06226	1.1293	1.07277
P26639	TARS	Homo sapiens	Threonine--tRNA ligase, cytoplasmic	0.25	0.25	0	1.1095	5.33018e-10	Stabilized	52	1	0.990123	0.957475	1.04374	0.95765
P26639	TARS	Homo sapiens	Threonine--tRNA ligase, cytoplasmic	0.25	0.25	0	1.1095	5.33018e-10	Stabilized	54	1	1.01548	1.00445	1.01297	1.06897
P26639	TARS	Homo sapiens	Threonine--tRNA ligase, cytoplasmic	0.25	0.25	0	1.1095	5.33018e-10	Stabilized	56	1	0.95579	1.00802	1.06728	1.15243
P26639	TARS	Homo sapiens	Threonine--tRNA ligase, cytoplasmic	0.25	0.25	0	1.1095	5.33018e-10	Stabilized	58	1	1.12918	1.03836	1.23788	1.34923
P26639	TARS	Homo sapiens	Threonine--tRNA ligase, cytoplasmic	0.25	0.25	0	1.1095	5.33018e-10	Stabilized	60	1	0.943025	0.957819	1.37398	1.49252
P26639	TARS	Homo sapiens	Threonine--tRNA ligase, cytoplasmic	0.25	0.25	0	1.1095	5.33018e-10	Stabilized	62	1	1.07998	0.987948	1.54863	1.67566
P26639	TARS	Homo sapiens	Threonine--tRNA ligase, cytoplasmic	0.25	0.25	0	1.1095	5.33018e-10	Stabilized	64	1	1.03226	1.00894	1.55698	1.63083
Q15084-2	PDIA6	Homo sapiens	Isoform 2 of Protein disulfide-isomerase A6	0.25	0.25	0	1.09077	5.33018e-10	Solubility/Expression	42	1	1.66048	0.957272	0.944791	1.48125
Q15084-2	PDIA6	Homo sapiens	Isoform 2 of Protein disulfide-isomerase A6	0.25	0.25	0	1.09077	5.33018e-10	Solubility/Expression	44	1	1.68594	1.00889	1.18199	1.3142
Q15084-2	PDIA6	Homo sapiens	Isoform 2 of Protein disulfide-isomerase A6	0.25	0.25	0	1.09077	5.33018e-10	Solubility/Expression	46	1	1.84207	1.32768	0.999824	1.31194
Q15084-2	PDIA6	Homo sapiens	Isoform 2 of Protein disulfide-isomerase A6	0.25	0.25	0	1.09077	5.33018e-10	Solubility/Expression	48	1	1.79036	1.04033	1.08529	1.33847
Q15084-2	PDIA6	Homo sapiens	Isoform 2 of Protein disulfide-isomerase A6	0.25	0.25	0	1.09077	5.33018e-10	Solubility/Expression	50	1	1.13202	1.14461	1.16769	1.05675
Q15084-2	PDIA6	Homo sapiens	Isoform 2 of Protein disulfide-isomerase A6	0.25	0.25	0	1.09077	5.33018e-10	Solubility/Expression	52	1	1.04117	1.11158	1.07947	1.15446
Q15084-2	PDIA6	Homo sapiens	Isoform 2 of Protein disulfide-isomerase A6	0.25	0.25	0	1.09077	5.33018e-10	Solubility/Expression	54	1	0.972405	1.13152	0.959429	0.853758
Q15084-2	PDIA6	Homo sapiens	Isoform 2 of Protein disulfide-isomerase A6	0.25	0.25	0	1.09077	5.33018e-10	Solubility/Expression	56	1	0.949713	1.10362	0.918449	0.898539
Q15084-2	PDIA6	Homo sapiens	Isoform 2 of Protein disulfide-isomerase A6	0.25	0.25	0	1.09077	5.33018e-10	Solubility/Expression	58	1	1.05137	1.08122	0.844448	0.798935
Q15084-2	PDIA6	Homo sapiens	Isoform 2 of Protein disulfide-isomerase A6	0.25	0.25	0	1.09077	5.33018e-10	Solubility/Expression	60	1	0.9909	1.17828	0.789722	0.826883
Q15084-2	PDIA6	Homo sapiens	Isoform 2 of Protein disulfide-isomerase A6	0.25	0.25	0	1.09077	5.33018e-10	Solubility/Expression	62	1	1.06605	1.25977	0.730018	0.834269
Q15084-2	PDIA6	Homo sapiens	Isoform 2 of Protein disulfide-isomerase A6	0.25	0.25	0	1.09077	5.33018e-10	Solubility/Expression	64	1	1.15008	1.4562	0.85113	0.890997
Q86TS9	MRPL52	Homo sapiens	39S ribosomal protein L52, mitochondrial	0.25	0.25	0	1.0789	5.33018e-10	Stabilized	42	1	1.17482	1.19154	1.2909	1.07601
Q86TS9	MRPL52	Homo sapiens	39S ribosomal protein L52, mitochondrial	0.25	0.25	0	1.0789	5.33018e-10	Stabilized	44	1	1.04463	1.02167	0.931054	1.07148
Q86TS9	MRPL52	Homo sapiens	39S ribosomal protein L52, mitochondrial	0.25	0.25	0	1.0789	5.33018e-10	Stabilized	46	1	1.11812	1.1258	1.11156	1.15263
Q86TS9	MRPL52	Homo sapiens	39S ribosomal protein L52, mitochondrial	0.25	0.25	0	1.0789	5.33018e-10	Stabilized	48	1	0.848706	0.914319	1.06087	0.936832
Q86TS9	MRPL52	Homo sapiens	39S ribosomal protein L52, mitochondrial	0.25	0.25	0	1.0789	5.33018e-10	Stabilized	50	1	1.02242	1.01275	1.02883	1.02515
Q86TS9	MRPL52	Homo sapiens	39S ribosomal protein L52, mitochondrial	0.25	0.25	0	1.0789	5.33018e-10	Stabilized	52	1	1.01849	1.03343	1.13207	1.10217
Q86TS9	MRPL52	Homo sapiens	39S ribosomal protein L52, mitochondrial	0.25	0.25	0	1.0789	5.33018e-10	Stabilized	54	1	1.0573	1.07141	1.18394	1.21785
Q86TS9	MRPL52	Homo sapiens	39S ribosomal protein L52, mitochondrial	0.25	0.25	0	1.0789	5.33018e-10	Stabilized	56	1	1.0657	0.911009	1.38691	1.04133
Q86TS9	MRPL52	Homo sapiens	39S ribosomal protein L52, mitochondrial	0.25	0.25	0	1.0789	5.33018e-10	Stabilized	58	1	0.903411	0.657902	1.73209	1.62703
Q86TS9	MRPL52	Homo sapiens	39S ribosomal protein L52, mitochondrial	0.25	0.25	0	1.0789	5.33018e-10	Stabilized	60	1	0.967948	0.998102	1.07865	1.11796
Q86TS9	MRPL52	Homo sapiens	39S ribosomal protein L52, mitochondrial	0.25	0.25	0	1.0789	5.33018e-10	Stabilized	62	1	1.01177	0.695543	1.17638	2.38521
Q86TS9	MRPL52	Homo sapiens	39S ribosomal protein L52, mitochondrial	0.25	0.25	0	1.0789	5.33018e-10	Stabilized	64	NaN	NaN	NaN	NaN	NaN
Q9UGV2	NDRG3	Homo sapiens	Protein NDRG3	0.25	0.25	0	1.04406	5.33018e-10	Stabilized	42	1	0.97449	0.964164	0.963653	0.989955
Q9UGV2	NDRG3	Homo sapiens	Protein NDRG3	0.25	0.25	0	1.04406	5.33018e-10	Stabilized	44	1	0.989831	0.974176	0.989323	0.983247
Q9UGV2	NDRG3	Homo sapiens	Protein NDRG3	0.25	0.25	0	1.04406	5.33018e-10	Stabilized	46	1	1.01805	1.03247	1.07057	0.992591
Q9UGV2	NDRG3	Homo sapiens	Protein NDRG3	0.25	0.25	0	1.04406	5.33018e-10	Stabilized	48	1	0.978488	0.953053	1.00925	0.957806
Q9UGV2	NDRG3	Homo sapiens	Protein NDRG3	0.25	0.25	0	1.04406	5.33018e-10	Stabilized	50	1	1.03324	1.02816	1.02272	0.989636
Q9UGV2	NDRG3	Homo sapiens	Protein NDRG3	0.25	0.25	0	1.04406	5.33018e-10	Stabilized	52	1	0.98764	0.93642	1.01873	0.921553
Q9UGV2	NDRG3	Homo sapiens	Protein NDRG3	0.25	0.25	0	1.04406	5.33018e-10	Stabilized	54	1	0.959026	0.886277	0.997124	0.937876
Q9UGV2	NDRG3	Homo sapiens	Protein NDRG3	0.25	0.25	0	1.04406	5.33018e-10	Stabilized	56	1	0.908454	0.83543	1.05215	0.93773
Q9UGV2	NDRG3	Homo sapiens	Protein NDRG3	0.25	0.25	0	1.04406	5.33018e-10	Stabilized	58	1	1.05874	0.98643	1.1268	1.06239
Q9UGV2	NDRG3	Homo sapiens	Protein NDRG3	0.25	0.25	0	1.04406	5.33018e-10	Stabilized	60	1	0.963097	0.890466	1.49692	1.4591
Q9UGV2	NDRG3	Homo sapiens	Protein NDRG3	0.25	0.25	0	1.04406	5.33018e-10	Stabilized	62	1	1.00145	1.01728	1.76099	1.91052
Q9UGV2	NDRG3	Homo sapiens	Protein NDRG3	0.25	0.25	0	1.04406	5.33018e-10	Stabilized	64	1	1.02987	1.04735	1.24062	1.2985
Q7Z3F1	GPR155	Homo sapiens	Integral membrane protein GPR155	0.233333	0.233333	0	1.28336	6.8218e-09	Stabilized	42	1	1.5627	1.11412	1.57432	1.58456
Q7Z3F1	GPR155	Homo sapiens	Integral membrane protein GPR155	0.233333	0.233333	0	1.28336	6.8218e-09	Stabilized	44	1	0.986776	1.05517	1.28987	0.871244
Q7Z3F1	GPR155	Homo sapiens	Integral membrane protein GPR155	0.233333	0.233333	0	1.28336	6.8218e-09	Stabilized	46	1	1.08232	1.09511	1.23143	0.987918
Q7Z3F1	GPR155	Homo sapiens	Integral membrane protein GPR155	0.233333	0.233333	0	1.28336	6.8218e-09	Stabilized	48	1	0.962111	0.78407	1.49647	1.08925
Q7Z3F1	GPR155	Homo sapiens	Integral membrane protein GPR155	0.233333	0.233333	0	1.28336	6.8218e-09	Stabilized	50	1	1.06333	1.07719	1.47259	0.817727
Q7Z3F1	GPR155	Homo sapiens	Integral membrane protein GPR155	0.233333	0.233333	0	1.28336	6.8218e-09	Stabilized	52	NaN	NaN	NaN	NaN	NaN
Q7Z3F1	GPR155	Homo sapiens	Integral membrane protein GPR155	0.233333	0.233333	0	1.28336	6.8218e-09	Stabilized	54	1	1.13326	1.09887	1.5687	0.879771
Q7Z3F1	GPR155	Homo sapiens	Integral membrane protein GPR155	0.233333	0.233333	0	1.28336	6.8218e-09	Stabilized	56	NaN	NaN	NaN	NaN	NaN
Q7Z3F1	GPR155	Homo sapiens	Integral membrane protein GPR155	0.233333	0.233333	0	1.28336	6.8218e-09	Stabilized	58	1	0.910376	0.896511	1.32977	0.964211
Q7Z3F1	GPR155	Homo sapiens	Integral membrane protein GPR155	0.233333	0.233333	0	1.28336	6.8218e-09	Stabilized	60	1	0.976475	1.13985	1.34811	1.08109
Q7Z3F1	GPR155	Homo sapiens	Integral membrane protein GPR155	0.233333	0.233333	0	1.28336	6.8218e-09	Stabilized	62	1	1.19696	1.46561	1.50891	1.99532
Q7Z3F1	GPR155	Homo sapiens	Integral membrane protein GPR155	0.233333	0.233333	0	1.28336	6.8218e-09	Stabilized	64	1	1.98047	2.43651	4.61157	5.28099
P27348	YWHAQ	Homo sapiens	14-3-3 protein theta	0.233333	0.233333	0	1.25234	6.8218e-09	Solubility/Expression	42	1	1.68342	1.02531	1.24796	1.40968
P27348	YWHAQ	Homo sapiens	14-3-3 protein theta	0.233333	0.233333	0	1.25234	6.8218e-09	Solubility/Expression	44	1	2.032	0.800697	1.16318	1.60972
P27348	YWHAQ	Homo sapiens	14-3-3 protein theta	0.233333	0.233333	0	1.25234	6.8218e-09	Solubility/Expression	46	1	2.1602	0.929254	1.14361	1.6567
P27348	YWHAQ	Homo sapiens	14-3-3 protein theta	0.233333	0.233333	0	1.25234	6.8218e-09	Solubility/Expression	48	1	1.90634	1.03351	1.29798	1.4927
P27348	YWHAQ	Homo sapiens	14-3-3 protein theta	0.233333	0.233333	0	1.25234	6.8218e-09	Solubility/Expression	50	1	1.0636	1.03846	1.0904	1.27903
P27348	YWHAQ	Homo sapiens	14-3-3 protein theta	0.233333	0.233333	0	1.25234	6.8218e-09	Solubility/Expression	52	1	1.05489	0.879485	1.05603	1.03441
P27348	YWHAQ	Homo sapiens	14-3-3 protein theta	0.233333	0.233333	0	1.25234	6.8218e-09	Solubility/Expression	54	1	0.995583	0.897082	0.971217	0.973927
P27348	YWHAQ	Homo sapiens	14-3-3 protein theta	0.233333	0.233333	0	1.25234	6.8218e-09	Solubility/Expression	56	1	0.965912	1.05616	1.14659	1.16043
P27348	YWHAQ	Homo sapiens	14-3-3 protein theta	0.233333	0.233333	0	1.25234	6.8218e-09	Solubility/Expression	58	1	1.11783	1.02806	1.49716	1.66225
P27348	YWHAQ	Homo sapiens	14-3-3 protein theta	0.233333	0.233333	0	1.25234	6.8218e-09	Solubility/Expression	60	1	0.911912	0.90915	1.60274	1.72419
P27348	YWHAQ	Homo sapiens	14-3-3 protein theta	0.233333	0.233333	0	1.25234	6.8218e-09	Solubility/Expression	62	1	1.17337	1.00808	2.00692	2.33204
P27348	YWHAQ	Homo sapiens	14-3-3 protein theta	0.233333	0.233333	0	1.25234	6.8218e-09	Solubility/Expression	64	1	1.0617	0.964215	2.34691	2.53816
Q01518-2	CAP1	Homo sapiens	Isoform 2 of Adenylyl cyclase-associated protein 1	0.233333	0.233333	0	1.17211	6.8218e-09	Stabilized	42	1	1.21637	0.854431	1.12192	1.13741
Q01518-2	CAP1	Homo sapiens	Isoform 2 of Adenylyl cyclase-associated protein 1	0.233333	0.233333	0	1.17211	6.8218e-09	Stabilized	44	1	1.53605	0.932825	0.950939	1.67396
Q01518-2	CAP1	Homo sapiens	Isoform 2 of Adenylyl cyclase-associated protein 1	0.233333	0.233333	0	1.17211	6.8218e-09	Stabilized	46	1	2.50045	1.02844	1.15794	2.02049
Q01518-2	CAP1	Homo sapiens	Isoform 2 of Adenylyl cyclase-associated protein 1	0.233333	0.233333	0	1.17211	6.8218e-09	Stabilized	48	1	1.37065	1.0656	1.3299	1.22044
Q01518-2	CAP1	Homo sapiens	Isoform 2 of Adenylyl cyclase-associated protein 1	0.233333	0.233333	0	1.17211	6.8218e-09	Stabilized	50	1	1.05641	1.27154	1.31733	1.34591
Q01518-2	CAP1	Homo sapiens	Isoform 2 of Adenylyl cyclase-associated protein 1	0.233333	0.233333	0	1.17211	6.8218e-09	Stabilized	52	1	1.03762	0.974282	1.03567	1.02899
Q01518-2	CAP1	Homo sapiens	Isoform 2 of Adenylyl cyclase-associated protein 1	0.233333	0.233333	0	1.17211	6.8218e-09	Stabilized	54	1	0.998955	1.00366	0.92742	0.995215
Q01518-2	CAP1	Homo sapiens	Isoform 2 of Adenylyl cyclase-associated protein 1	0.233333	0.233333	0	1.17211	6.8218e-09	Stabilized	56	1	0.891089	1.0613	0.973856	1.12024
Q01518-2	CAP1	Homo sapiens	Isoform 2 of Adenylyl cyclase-associated protein 1	0.233333	0.233333	0	1.17211	6.8218e-09	Stabilized	58	1	1.10612	0.96485	1.41774	1.57759
Q01518-2	CAP1	Homo sapiens	Isoform 2 of Adenylyl cyclase-associated protein 1	0.233333	0.233333	0	1.17211	6.8218e-09	Stabilized	60	1	0.785046	0.77424	1.28574	1.42845
Q01518-2	CAP1	Homo sapiens	Isoform 2 of Adenylyl cyclase-associated protein 1	0.233333	0.233333	0	1.17211	6.8218e-09	Stabilized	62	1	1.10536	0.912227	1.6468	1.67918
Q01518-2	CAP1	Homo sapiens	Isoform 2 of Adenylyl cyclase-associated protein 1	0.233333	0.233333	0	1.17211	6.8218e-09	Stabilized	64	1	1.0033	0.928164	1.73514	1.81951
Q96E39	RBMXL1	Homo sapiens	RNA binding motif protein, X-linked-like-1	0.233333	0.233333	0	1.16105	6.8218e-09	Solubility/Expression	42	1	1.61634	1.48768	1.2683	1.65442
Q96E39	RBMXL1	Homo sapiens	RNA binding motif protein, X-linked-like-1	0.233333	0.233333	0	1.16105	6.8218e-09	Solubility/Expression	44	1	1.74355	1.76435	2.15987	1.68431
Q96E39	RBMXL1	Homo sapiens	RNA binding motif protein, X-linked-like-1	0.233333	0.233333	0	1.16105	6.8218e-09	Solubility/Expression	46	1	1.24777	1.03011	1.25813	1.44143
Q96E39	RBMXL1	Homo sapiens	RNA binding motif protein, X-linked-like-1	0.233333	0.233333	0	1.16105	6.8218e-09	Solubility/Expression	48	1	1.11771	1.67325	1.17567	1.88782
Q96E39	RBMXL1	Homo sapiens	RNA binding motif protein, X-linked-like-1	0.233333	0.233333	0	1.16105	6.8218e-09	Solubility/Expression	50	NaN	NaN	NaN	NaN	NaN
Q96E39	RBMXL1	Homo sapiens	RNA binding motif protein, X-linked-like-1	0.233333	0.233333	0	1.16105	6.8218e-09	Solubility/Expression	52	NaN	NaN	NaN	NaN	NaN
Q96E39	RBMXL1	Homo sapiens	RNA binding motif protein, X-linked-like-1	0.233333	0.233333	0	1.16105	6.8218e-09	Solubility/Expression	54	NaN	NaN	NaN	NaN	NaN
Q96E39	RBMXL1	Homo sapiens	RNA binding motif protein, X-linked-like-1	0.233333	0.233333	0	1.16105	6.8218e-09	Solubility/Expression	56	NaN	NaN	NaN	NaN	NaN
Q96E39	RBMXL1	Homo sapiens	RNA binding motif protein, X-linked-like-1	0.233333	0.233333	0	1.16105	6.8218e-09	Solubility/Expression	58	1	1.07656	0.933399	1.00364	1.09543
Q96E39	RBMXL1	Homo sapiens	RNA binding motif protein, X-linked-like-1	0.233333	0.233333	0	1.16105	6.8218e-09	Solubility/Expression	60	1	1.05212	1.26422	1.01522	1.47216
Q96E39	RBMXL1	Homo sapiens	RNA binding motif protein, X-linked-like-1	0.233333	0.233333	0	1.16105	6.8218e-09	Solubility/Expression	62	1	1.32795	0.929498	0.976145	1.30728
Q96E39	RBMXL1	Homo sapiens	RNA binding motif protein, X-linked-like-1	0.233333	0.233333	0	1.16105	6.8218e-09	Solubility/Expression	64	1	1.03094	0.823695	0.828551	1.31522
Q9NZ01	TECR	Homo sapiens	Very-long-chain enoyl-CoA reductase	0.233333	0.233333	0	1.15717	6.8218e-09	Solubility/Expression	42	1	2.91976	0.961387	0.972699	1.78359
Q9NZ01	TECR	Homo sapiens	Very-long-chain enoyl-CoA reductase	0.233333	0.233333	0	1.15717	6.8218e-09	Solubility/Expression	44	1	0.970391	1.02021	0.970638	0.993078
Q9NZ01	TECR	Homo sapiens	Very-long-chain enoyl-CoA reductase	0.233333	0.233333	0	1.15717	6.8218e-09	Solubility/Expression	46	1	1.12794	1.13013	1.10924	1.06808
Q9NZ01	TECR	Homo sapiens	Very-long-chain enoyl-CoA reductase	0.233333	0.233333	0	1.15717	6.8218e-09	Solubility/Expression	48	1	1.09287	1.06333	1.05821	1.03277
Q9NZ01	TECR	Homo sapiens	Very-long-chain enoyl-CoA reductase	0.233333	0.233333	0	1.15717	6.8218e-09	Solubility/Expression	50	1	1.34577	1.19532	1.22746	1.19954
Q9NZ01	TECR	Homo sapiens	Very-long-chain enoyl-CoA reductase	0.233333	0.233333	0	1.15717	6.8218e-09	Solubility/Expression	52	1	0.988039	1.0114	1.0271	0.926234
Q9NZ01	TECR	Homo sapiens	Very-long-chain enoyl-CoA reductase	0.233333	0.233333	0	1.15717	6.8218e-09	Solubility/Expression	54	1	1.02983	1.03411	0.992037	1.00329
Q9NZ01	TECR	Homo sapiens	Very-long-chain enoyl-CoA reductase	0.233333	0.233333	0	1.15717	6.8218e-09	Solubility/Expression	56	1	0.974806	1.08992	1.07164	1.11357
Q9NZ01	TECR	Homo sapiens	Very-long-chain enoyl-CoA reductase	0.233333	0.233333	0	1.15717	6.8218e-09	Solubility/Expression	58	1	1.10758	1.0434	1.13195	1.23561
Q9NZ01	TECR	Homo sapiens	Very-long-chain enoyl-CoA reductase	0.233333	0.233333	0	1.15717	6.8218e-09	Solubility/Expression	60	1	0.869673	0.902544	1.11803	1.24759
Q9NZ01	TECR	Homo sapiens	Very-long-chain enoyl-CoA reductase	0.233333	0.233333	0	1.15717	6.8218e-09	Solubility/Expression	62	1	1.18655	1.07996	2.2052	2.45889
Q9NZ01	TECR	Homo sapiens	Very-long-chain enoyl-CoA reductase	0.233333	0.233333	0	1.15717	6.8218e-09	Solubility/Expression	64	1	1.15348	1.07288	1.58093	1.53129
Q02790	FKBP4	Homo sapiens	Peptidyl-prolyl cis-trans isomerase FKBP4	0.233333	0.233333	0	1.15256	6.8218e-09	Solubility/Expression	42	1	2.23694	1.03526	1.30147	1.72134
Q02790	FKBP4	Homo sapiens	Peptidyl-prolyl cis-trans isomerase FKBP4	0.233333	0.233333	0	1.15256	6.8218e-09	Solubility/Expression	44	1	1.78807	0.916681	1.36627	1.77785
Q02790	FKBP4	Homo sapiens	Peptidyl-prolyl cis-trans isomerase FKBP4	0.233333	0.233333	0	1.15256	6.8218e-09	Solubility/Expression	46	1	1.53299	1.05325	1.15772	1.2899
Q02790	FKBP4	Homo sapiens	Peptidyl-prolyl cis-trans isomerase FKBP4	0.233333	0.233333	0	1.15256	6.8218e-09	Solubility/Expression	48	1	1.52062	1.11765	1.2781	1.28475
Q02790	FKBP4	Homo sapiens	Peptidyl-prolyl cis-trans isomerase FKBP4	0.233333	0.233333	0	1.15256	6.8218e-09	Solubility/Expression	50	1	1.35628	1.08886	1.18503	1.38726
Q02790	FKBP4	Homo sapiens	Peptidyl-prolyl cis-trans isomerase FKBP4	0.233333	0.233333	0	1.15256	6.8218e-09	Solubility/Expression	52	1	0.849702	0.685877	0.829899	0.760271
Q02790	FKBP4	Homo sapiens	Peptidyl-prolyl cis-trans isomerase FKBP4	0.233333	0.233333	0	1.15256	6.8218e-09	Solubility/Expression	54	1	1.00337	0.972426	1.13189	1.19478
Q02790	FKBP4	Homo sapiens	Peptidyl-prolyl cis-trans isomerase FKBP4	0.233333	0.233333	0	1.15256	6.8218e-09	Solubility/Expression	56	1	0.866359	0.785097	0.899383	0.923065
Q02790	FKBP4	Homo sapiens	Peptidyl-prolyl cis-trans isomerase FKBP4	0.233333	0.233333	0	1.15256	6.8218e-09	Solubility/Expression	58	1	1.01585	1.01673	1.23419	1.30806
Q02790	FKBP4	Homo sapiens	Peptidyl-prolyl cis-trans isomerase FKBP4	0.233333	0.233333	0	1.15256	6.8218e-09	Solubility/Expression	60	1	0.913748	0.950316	1.36034	1.47752
Q02790	FKBP4	Homo sapiens	Peptidyl-prolyl cis-trans isomerase FKBP4	0.233333	0.233333	0	1.15256	6.8218e-09	Solubility/Expression	62	1	0.977134	0.952274	1.4568	1.55675
Q02790	FKBP4	Homo sapiens	Peptidyl-prolyl cis-trans isomerase FKBP4	0.233333	0.233333	0	1.15256	6.8218e-09	Solubility/Expression	64	1	0.958355	1.01987	1.3106	1.3465
Q9NR31	SAR1A	Homo sapiens	GTP-binding protein SAR1a	0.233333	0.233333	0	1.14058	6.8218e-09	Stabilized	42	1	1.43687	1.22718	1.43707	1.38156
Q9NR31	SAR1A	Homo sapiens	GTP-binding protein SAR1a	0.233333	0.233333	0	1.14058	6.8218e-09	Stabilized	44	1	1.34577	0.945304	1.31988	1.25192
Q9NR31	SAR1A	Homo sapiens	GTP-binding protein SAR1a	0.233333	0.233333	0	1.14058	6.8218e-09	Stabilized	46	1	1.13699	1.17137	1.13734	1.07461
Q9NR31	SAR1A	Homo sapiens	GTP-binding protein SAR1a	0.233333	0.233333	0	1.14058	6.8218e-09	Stabilized	48	1	1.02014	0.978976	1.03433	1.00184
Q9NR31	SAR1A	Homo sapiens	GTP-binding protein SAR1a	0.233333	0.233333	0	1.14058	6.8218e-09	Stabilized	50	1	1.01548	1.02106	1.08414	1.08728
Q9NR31	SAR1A	Homo sapiens	GTP-binding protein SAR1a	0.233333	0.233333	0	1.14058	6.8218e-09	Stabilized	52	1	0.975713	0.99154	1.09813	1.0851
Q9NR31	SAR1A	Homo sapiens	GTP-binding protein SAR1a	0.233333	0.233333	0	1.14058	6.8218e-09	Stabilized	54	1	0.972253	0.952955	1.04944	1.06575
Q9NR31	SAR1A	Homo sapiens	GTP-binding protein SAR1a	0.233333	0.233333	0	1.14058	6.8218e-09	Stabilized	56	1	0.979527	1.16931	1.13852	1.17831
Q9NR31	SAR1A	Homo sapiens	GTP-binding protein SAR1a	0.233333	0.233333	0	1.14058	6.8218e-09	Stabilized	58	1	1.16032	1.07312	1.32559	1.46822
Q9NR31	SAR1A	Homo sapiens	GTP-binding protein SAR1a	0.233333	0.233333	0	1.14058	6.8218e-09	Stabilized	60	1	0.863039	0.926863	1.45376	1.71321
Q9NR31	SAR1A	Homo sapiens	GTP-binding protein SAR1a	0.233333	0.233333	0	1.14058	6.8218e-09	Stabilized	62	1	1.25226	1.04728	1.60071	1.78153
Q9NR31	SAR1A	Homo sapiens	GTP-binding protein SAR1a	0.233333	0.233333	0	1.14058	6.8218e-09	Stabilized	64	1	0.944225	0.940647	1.50372	1.61462
P48739-3	PITPNB	Homo sapiens	Isoform 3 of Phosphatidylinositol transfer protein beta isoform	0.233333	0.233333	0	1.13813	6.8218e-09	Stabilized	42	1	1.04296	0.922945	1.05	1.0067
P48739-3	PITPNB	Homo sapiens	Isoform 3 of Phosphatidylinositol transfer protein beta isoform	0.233333	0.233333	0	1.13813	6.8218e-09	Stabilized	44	1	1.57552	0.993471	0.998039	1.36332
P48739-3	PITPNB	Homo sapiens	Isoform 3 of Phosphatidylinositol transfer protein beta isoform	0.233333	0.233333	0	1.13813	6.8218e-09	Stabilized	46	1	2.16816	1.0831	1.37668	1.64836
P48739-3	PITPNB	Homo sapiens	Isoform 3 of Phosphatidylinositol transfer protein beta isoform	0.233333	0.233333	0	1.13813	6.8218e-09	Stabilized	48	1	1.04548	1.01456	1.00008	1.00654
P48739-3	PITPNB	Homo sapiens	Isoform 3 of Phosphatidylinositol transfer protein beta isoform	0.233333	0.233333	0	1.13813	6.8218e-09	Stabilized	50	1	1.04431	1.02592	1.05577	1.06539
P48739-3	PITPNB	Homo sapiens	Isoform 3 of Phosphatidylinositol transfer protein beta isoform	0.233333	0.233333	0	1.13813	6.8218e-09	Stabilized	52	1	1.0264	1.0372	1.05271	1.06517
P48739-3	PITPNB	Homo sapiens	Isoform 3 of Phosphatidylinositol transfer protein beta isoform	0.233333	0.233333	0	1.13813	6.8218e-09	Stabilized	54	1	1.02768	1.028	0.960376	0.986575
P48739-3	PITPNB	Homo sapiens	Isoform 3 of Phosphatidylinositol transfer protein beta isoform	0.233333	0.233333	0	1.13813	6.8218e-09	Stabilized	56	1	1.01652	1.11375	1.03934	1.09715
P48739-3	PITPNB	Homo sapiens	Isoform 3 of Phosphatidylinositol transfer protein beta isoform	0.233333	0.233333	0	1.13813	6.8218e-09	Stabilized	58	1	1.23968	1.11008	1.30912	1.46522
P48739-3	PITPNB	Homo sapiens	Isoform 3 of Phosphatidylinositol transfer protein beta isoform	0.233333	0.233333	0	1.13813	6.8218e-09	Stabilized	60	1	0.870391	0.905354	1.29053	1.39903
P48739-3	PITPNB	Homo sapiens	Isoform 3 of Phosphatidylinositol transfer protein beta isoform	0.233333	0.233333	0	1.13813	6.8218e-09	Stabilized	62	1	1.12314	0.974857	1.72483	1.84216
P48739-3	PITPNB	Homo sapiens	Isoform 3 of Phosphatidylinositol transfer protein beta isoform	0.233333	0.233333	0	1.13813	6.8218e-09	Stabilized	64	1	1.01636	0.986623	1.51934	1.57275
P60981	DSTN	Homo sapiens	Destrin	0.233333	0.233333	0	1.13048	6.8218e-09	Solubility/Expression	42	1	1.75391	1.0124	1.01079	1.49724
P60981	DSTN	Homo sapiens	Destrin	0.233333	0.233333	0	1.13048	6.8218e-09	Solubility/Expression	44	1	1.64647	0.985538	1.08343	1.54181
P60981	DSTN	Homo sapiens	Destrin	0.233333	0.233333	0	1.13048	6.8218e-09	Solubility/Expression	46	1	1.61007	1.01758	1.06026	1.44852
P60981	DSTN	Homo sapiens	Destrin	0.233333	0.233333	0	1.13048	6.8218e-09	Solubility/Expression	48	1	1.28484	1.00131	1.30288	1.16955
P60981	DSTN	Homo sapiens	Destrin	0.233333	0.233333	0	1.13048	6.8218e-09	Solubility/Expression	50	1	1.06895	1.06724	1.12226	1.09357
P60981	DSTN	Homo sapiens	Destrin	0.233333	0.233333	0	1.13048	6.8218e-09	Solubility/Expression	52	1	1.03486	1.04108	1.05312	1.02184
P60981	DSTN	Homo sapiens	Destrin	0.233333	0.233333	0	1.13048	6.8218e-09	Solubility/Expression	54	1	0.987574	1.04341	0.945821	0.940833
P60981	DSTN	Homo sapiens	Destrin	0.233333	0.233333	0	1.13048	6.8218e-09	Solubility/Expression	56	1	1.00116	1.01996	0.946542	0.964877
P60981	DSTN	Homo sapiens	Destrin	0.233333	0.233333	0	1.13048	6.8218e-09	Solubility/Expression	58	1	1.11725	1.01513	0.942971	0.994482
P60981	DSTN	Homo sapiens	Destrin	0.233333	0.233333	0	1.13048	6.8218e-09	Solubility/Expression	60	1	0.911414	0.927963	1.10733	1.19995
P60981	DSTN	Homo sapiens	Destrin	0.233333	0.233333	0	1.13048	6.8218e-09	Solubility/Expression	62	1	1.10721	0.947004	1.5492	1.7216
P60981	DSTN	Homo sapiens	Destrin	0.233333	0.233333	0	1.13048	6.8218e-09	Solubility/Expression	64	1	1.22047	0.943503	1.68929	1.65433
P63167	DYNLL1	Homo sapiens	Dynein light chain 1, cytoplasmic	0.233333	0.233333	0	1.09088	6.8218e-09	Stabilized	42	1	1.34757	1.20788	1.24815	1.35154
P63167	DYNLL1	Homo sapiens	Dynein light chain 1, cytoplasmic	0.233333	0.233333	0	1.09088	6.8218e-09	Stabilized	44	1	1.00307	0.976881	1.05865	0.94314
P63167	DYNLL1	Homo sapiens	Dynein light chain 1, cytoplasmic	0.233333	0.233333	0	1.09088	6.8218e-09	Stabilized	46	1	0.996147	0.999103	1.08594	1.04109
P63167	DYNLL1	Homo sapiens	Dynein light chain 1, cytoplasmic	0.233333	0.233333	0	1.09088	6.8218e-09	Stabilized	48	1	1.02721	1.04381	1.18936	1.09992
P63167	DYNLL1	Homo sapiens	Dynein light chain 1, cytoplasmic	0.233333	0.233333	0	1.09088	6.8218e-09	Stabilized	50	1	1.08095	1.0124	1.06601	0.959785
P63167	DYNLL1	Homo sapiens	Dynein light chain 1, cytoplasmic	0.233333	0.233333	0	1.09088	6.8218e-09	Stabilized	52	1	0.933351	1.04572	1.12754	0.979176
P63167	DYNLL1	Homo sapiens	Dynein light chain 1, cytoplasmic	0.233333	0.233333	0	1.09088	6.8218e-09	Stabilized	54	1	1.03397	1.07107	1.0235	0.929341
P63167	DYNLL1	Homo sapiens	Dynein light chain 1, cytoplasmic	0.233333	0.233333	0	1.09088	6.8218e-09	Stabilized	56	1	0.871596	0.869279	0.882747	0.77209
P63167	DYNLL1	Homo sapiens	Dynein light chain 1, cytoplasmic	0.233333	0.233333	0	1.09088	6.8218e-09	Stabilized	58	1	1.0685	1.07503	1.15503	1.22619
P63167	DYNLL1	Homo sapiens	Dynein light chain 1, cytoplasmic	0.233333	0.233333	0	1.09088	6.8218e-09	Stabilized	60	1	1.032	1.13089	1.18963	1.29262
P63167	DYNLL1	Homo sapiens	Dynein light chain 1, cytoplasmic	0.233333	0.233333	0	1.09088	6.8218e-09	Stabilized	62	1	1.35679	1.1725	1.41867	1.90236
P63167	DYNLL1	Homo sapiens	Dynein light chain 1, cytoplasmic	0.233333	0.233333	0	1.09088	6.8218e-09	Stabilized	64	1	0.900789	1.15636	1.45575	1.64183
Q99426	TBCB	Homo sapiens	Tubulin-folding cofactor B	0.233333	0.233333	0	1.08783	6.8218e-09	Stabilized	42	1	1.04055	1.10313	1.06291	1.05919
Q99426	TBCB	Homo sapiens	Tubulin-folding cofactor B	0.233333	0.233333	0	1.08783	6.8218e-09	Stabilized	44	1	1.14275	1.077	1.08317	1.0926
Q99426	TBCB	Homo sapiens	Tubulin-folding cofactor B	0.233333	0.233333	0	1.08783	6.8218e-09	Stabilized	46	1	1.69934	1.09369	0.988223	1.31969
Q99426	TBCB	Homo sapiens	Tubulin-folding cofactor B	0.233333	0.233333	0	1.08783	6.8218e-09	Stabilized	48	1	1.27072	1.0116	1.12533	1.10836
Q99426	TBCB	Homo sapiens	Tubulin-folding cofactor B	0.233333	0.233333	0	1.08783	6.8218e-09	Stabilized	50	1	1.02964	1.01035	0.972977	0.986983
Q99426	TBCB	Homo sapiens	Tubulin-folding cofactor B	0.233333	0.233333	0	1.08783	6.8218e-09	Stabilized	52	1	0.925577	0.791448	0.828457	0.792154
Q99426	TBCB	Homo sapiens	Tubulin-folding cofactor B	0.233333	0.233333	0	1.08783	6.8218e-09	Stabilized	54	1	1.03492	0.941414	1.13337	1.12519
Q99426	TBCB	Homo sapiens	Tubulin-folding cofactor B	0.233333	0.233333	0	1.08783	6.8218e-09	Stabilized	56	1	1.0212	1.02732	1.00648	1.0632
Q99426	TBCB	Homo sapiens	Tubulin-folding cofactor B	0.233333	0.233333	0	1.08783	6.8218e-09	Stabilized	58	1	1.30397	0.93411	1.35905	1.55612
Q99426	TBCB	Homo sapiens	Tubulin-folding cofactor B	0.233333	0.233333	0	1.08783	6.8218e-09	Stabilized	60	1	0.888841	0.878342	1.46643	1.56663
Q99426	TBCB	Homo sapiens	Tubulin-folding cofactor B	0.233333	0.233333	0	1.08783	6.8218e-09	Stabilized	62	1	1.09653	0.894229	1.27521	1.459
Q99426	TBCB	Homo sapiens	Tubulin-folding cofactor B	0.233333	0.233333	0	1.08783	6.8218e-09	Stabilized	64	1	0.976812	0.985975	1.29119	1.36859
O96013	PAK4	Homo sapiens	Serine/threonine-protein kinase PAK 4	0.233333	0.233333	0	1.07419	6.8218e-09	Stabilized	42	1	1.00103	0.98397	0.991624	0.984594
O96013	PAK4	Homo sapiens	Serine/threonine-protein kinase PAK 4	0.233333	0.233333	0	1.07419	6.8218e-09	Stabilized	44	1	0.997476	0.956394	0.962313	0.980387
O96013	PAK4	Homo sapiens	Serine/threonine-protein kinase PAK 4	0.233333	0.233333	0	1.07419	6.8218e-09	Stabilized	46	1	1.03185	1.06775	1.04176	1.07703
O96013	PAK4	Homo sapiens	Serine/threonine-protein kinase PAK 4	0.233333	0.233333	0	1.07419	6.8218e-09	Stabilized	48	1	0.947802	0.919567	0.958722	0.965151
O96013	PAK4	Homo sapiens	Serine/threonine-protein kinase PAK 4	0.233333	0.233333	0	1.07419	6.8218e-09	Stabilized	50	1	1.12456	0.990525	1.06434	1.05107
O96013	PAK4	Homo sapiens	Serine/threonine-protein kinase PAK 4	0.233333	0.233333	0	1.07419	6.8218e-09	Stabilized	52	1	0.780887	0.757812	0.988609	1.04731
O96013	PAK4	Homo sapiens	Serine/threonine-protein kinase PAK 4	0.233333	0.233333	0	1.07419	6.8218e-09	Stabilized	54	1	1.35056	0.967416	1.03329	1.34511
O96013	PAK4	Homo sapiens	Serine/threonine-protein kinase PAK 4	0.233333	0.233333	0	1.07419	6.8218e-09	Stabilized	56	1	1.83455	1.94378	1.70819	1.57778
O96013	PAK4	Homo sapiens	Serine/threonine-protein kinase PAK 4	0.233333	0.233333	0	1.07419	6.8218e-09	Stabilized	58	1	1.00955	0.96779	1.1731	1.09986
O96013	PAK4	Homo sapiens	Serine/threonine-protein kinase PAK 4	0.233333	0.233333	0	1.07419	6.8218e-09	Stabilized	60	1	0.85137	0.97996	0.943512	1.02697
O96013	PAK4	Homo sapiens	Serine/threonine-protein kinase PAK 4	0.233333	0.233333	0	1.07419	6.8218e-09	Stabilized	62	1	1.07876	0.996497	1.17701	1.13376
O96013	PAK4	Homo sapiens	Serine/threonine-protein kinase PAK 4	0.233333	0.233333	0	1.07419	6.8218e-09	Stabilized	64	1	1.12178	1.14286	1.21556	1.09983
O60701	UGDH	Homo sapiens	UDP-glucose 6-dehydrogenase	0.233333	0.233333	0	1.07266	6.8218e-09	Stabilized	42	1	0.978803	0.981515	1.01801	1.00347
O60701	UGDH	Homo sapiens	UDP-glucose 6-dehydrogenase	0.233333	0.233333	0	1.07266	6.8218e-09	Stabilized	44	1	0.981329	0.989225	1.00825	1.0017
O60701	UGDH	Homo sapiens	UDP-glucose 6-dehydrogenase	0.233333	0.233333	0	1.07266	6.8218e-09	Stabilized	46	1	1.01109	1.00985	1.05291	1.00871
O60701	UGDH	Homo sapiens	UDP-glucose 6-dehydrogenase	0.233333	0.233333	0	1.07266	6.8218e-09	Stabilized	48	1	0.97013	0.965911	0.990519	0.962139
O60701	UGDH	Homo sapiens	UDP-glucose 6-dehydrogenase	0.233333	0.233333	0	1.07266	6.8218e-09	Stabilized	50	1	1.02649	1.0336	1.0725	1.06343
O60701	UGDH	Homo sapiens	UDP-glucose 6-dehydrogenase	0.233333	0.233333	0	1.07266	6.8218e-09	Stabilized	52	1	1.00113	0.995784	1.07756	1.03079
O60701	UGDH	Homo sapiens	UDP-glucose 6-dehydrogenase	0.233333	0.233333	0	1.07266	6.8218e-09	Stabilized	54	1	0.960244	1.03244	0.987851	1.028
O60701	UGDH	Homo sapiens	UDP-glucose 6-dehydrogenase	0.233333	0.233333	0	1.07266	6.8218e-09	Stabilized	56	1	0.913287	1.02998	1.11252	1.09217
O60701	UGDH	Homo sapiens	UDP-glucose 6-dehydrogenase	0.233333	0.233333	0	1.07266	6.8218e-09	Stabilized	58	1	0.941914	1.06394	1.24829	1.21749
O60701	UGDH	Homo sapiens	UDP-glucose 6-dehydrogenase	0.233333	0.233333	0	1.07266	6.8218e-09	Stabilized	60	1	0.899562	1.00392	1.41079	1.51486
O60701	UGDH	Homo sapiens	UDP-glucose 6-dehydrogenase	0.233333	0.233333	0	1.07266	6.8218e-09	Stabilized	62	1	1.14898	0.931471	1.51754	1.5916
O60701	UGDH	Homo sapiens	UDP-glucose 6-dehydrogenase	0.233333	0.233333	0	1.07266	6.8218e-09	Stabilized	64	1	1.13409	0.981486	1.66317	1.6992
Q15102	PAFAH1B3	Homo sapiens	Platelet-activating factor acetylhydrolase IB subunit gamma	0.233333	0.233333	0	1.0646	6.8218e-09	Stabilized	42	1	1.01628	1.10315	1.0466	1.07397
Q15102	PAFAH1B3	Homo sapiens	Platelet-activating factor acetylhydrolase IB subunit gamma	0.233333	0.233333	0	1.0646	6.8218e-09	Stabilized	44	1	1.03842	1.03686	0.991823	0.993296
Q15102	PAFAH1B3	Homo sapiens	Platelet-activating factor acetylhydrolase IB subunit gamma	0.233333	0.233333	0	1.0646	6.8218e-09	Stabilized	46	1	0.998916	1.02277	0.974541	0.968326
Q15102	PAFAH1B3	Homo sapiens	Platelet-activating factor acetylhydrolase IB subunit gamma	0.233333	0.233333	0	1.0646	6.8218e-09	Stabilized	48	1	1.01879	1.03214	0.990926	0.997825
Q15102	PAFAH1B3	Homo sapiens	Platelet-activating factor acetylhydrolase IB subunit gamma	0.233333	0.233333	0	1.0646	6.8218e-09	Stabilized	50	1	1.0068	1.02959	1.07095	1.08112
Q15102	PAFAH1B3	Homo sapiens	Platelet-activating factor acetylhydrolase IB subunit gamma	0.233333	0.233333	0	1.0646	6.8218e-09	Stabilized	52	1	0.935093	0.935016	1.00024	1.06793
Q15102	PAFAH1B3	Homo sapiens	Platelet-activating factor acetylhydrolase IB subunit gamma	0.233333	0.233333	0	1.0646	6.8218e-09	Stabilized	54	1	0.96331	0.999083	1.02534	1.07918
Q15102	PAFAH1B3	Homo sapiens	Platelet-activating factor acetylhydrolase IB subunit gamma	0.233333	0.233333	0	1.0646	6.8218e-09	Stabilized	56	1	1.04838	1.02767	1.09942	1.11856
Q15102	PAFAH1B3	Homo sapiens	Platelet-activating factor acetylhydrolase IB subunit gamma	0.233333	0.233333	0	1.0646	6.8218e-09	Stabilized	58	1	1.09777	1.06289	1.19128	1.26266
Q15102	PAFAH1B3	Homo sapiens	Platelet-activating factor acetylhydrolase IB subunit gamma	0.233333	0.233333	0	1.0646	6.8218e-09	Stabilized	60	1	1.04025	0.958793	1.23547	1.42335
Q15102	PAFAH1B3	Homo sapiens	Platelet-activating factor acetylhydrolase IB subunit gamma	0.233333	0.233333	0	1.0646	6.8218e-09	Stabilized	62	1	1.20346	0.932892	1.48114	1.69906
Q15102	PAFAH1B3	Homo sapiens	Platelet-activating factor acetylhydrolase IB subunit gamma	0.233333	0.233333	0	1.0646	6.8218e-09	Stabilized	64	1	1.04966	0.920787	1.23022	1.29404
Q8N0X7	SPART	Homo sapiens	Spartin	0.233333	0.233333	0	1.04703	6.8218e-09	Stabilized	42	1	0.957884	0.94356	0.979637	0.957701
Q8N0X7	SPART	Homo sapiens	Spartin	0.233333	0.233333	0	1.04703	6.8218e-09	Stabilized	44	1	1.0205	1.01624	1.03932	1.01028
Q8N0X7	SPART	Homo sapiens	Spartin	0.233333	0.233333	0	1.04703	6.8218e-09	Stabilized	46	1	0.971454	0.981213	1.01176	0.970748
Q8N0X7	SPART	Homo sapiens	Spartin	0.233333	0.233333	0	1.04703	6.8218e-09	Stabilized	48	1	0.968866	0.966131	1.00926	0.978249
Q8N0X7	SPART	Homo sapiens	Spartin	0.233333	0.233333	0	1.04703	6.8218e-09	Stabilized	50	1	1.01222	0.989638	0.967002	0.96285
Q8N0X7	SPART	Homo sapiens	Spartin	0.233333	0.233333	0	1.04703	6.8218e-09	Stabilized	52	1	1.05117	0.83804	1.27783	0.972622
Q8N0X7	SPART	Homo sapiens	Spartin	0.233333	0.233333	0	1.04703	6.8218e-09	Stabilized	54	1	1.11362	0.924923	1.02179	1.00362
Q8N0X7	SPART	Homo sapiens	Spartin	0.233333	0.233333	0	1.04703	6.8218e-09	Stabilized	56	1	1.13098	0.667828	0.903712	0.905781
Q8N0X7	SPART	Homo sapiens	Spartin	0.233333	0.233333	0	1.04703	6.8218e-09	Stabilized	58	1	1.03416	0.991026	1.10371	1.11675
Q8N0X7	SPART	Homo sapiens	Spartin	0.233333	0.233333	0	1.04703	6.8218e-09	Stabilized	60	1	1.07315	1.07473	1.10739	1.32694
Q8N0X7	SPART	Homo sapiens	Spartin	0.233333	0.233333	0	1.04703	6.8218e-09	Stabilized	62	1	1.09542	1.1008	1.64738	1.69038
Q8N0X7	SPART	Homo sapiens	Spartin	0.233333	0.233333	0	1.04703	6.8218e-09	Stabilized	64	1	1.09735	0.96166	1.42297	1.45141
Q9P000	COMMD9	Homo sapiens	COMM domain-containing protein 9	0.233333	0.233333	0	1.03107	6.8218e-09	Stabilized	42	1	0.985456	1.00199	1.0316	0.977153
Q9P000	COMMD9	Homo sapiens	COMM domain-containing protein 9	0.233333	0.233333	0	1.03107	6.8218e-09	Stabilized	44	1	0.95403	0.933401	0.971932	0.976181
Q9P000	COMMD9	Homo sapiens	COMM domain-containing protein 9	0.233333	0.233333	0	1.03107	6.8218e-09	Stabilized	46	1	0.918353	0.89785	0.979663	1.01939
Q9P000	COMMD9	Homo sapiens	COMM domain-containing protein 9	0.233333	0.233333	0	1.03107	6.8218e-09	Stabilized	48	1	1.04755	1.00981	1.0731	0.977249
Q9P000	COMMD9	Homo sapiens	COMM domain-containing protein 9	0.233333	0.233333	0	1.03107	6.8218e-09	Stabilized	50	1	0.977576	0.93642	0.924732	0.947388
Q9P000	COMMD9	Homo sapiens	COMM domain-containing protein 9	0.233333	0.233333	0	1.03107	6.8218e-09	Stabilized	52	1	1.052	1.01398	0.957318	1.02814
Q9P000	COMMD9	Homo sapiens	COMM domain-containing protein 9	0.233333	0.233333	0	1.03107	6.8218e-09	Stabilized	54	1	0.933795	1.01454	0.981795	0.98475
Q9P000	COMMD9	Homo sapiens	COMM domain-containing protein 9	0.233333	0.233333	0	1.03107	6.8218e-09	Stabilized	56	1	0.993588	0.974977	0.98601	1.09981
Q9P000	COMMD9	Homo sapiens	COMM domain-containing protein 9	0.233333	0.233333	0	1.03107	6.8218e-09	Stabilized	58	1	1.02628	0.940691	0.870985	1.02177
Q9P000	COMMD9	Homo sapiens	COMM domain-containing protein 9	0.233333	0.233333	0	1.03107	6.8218e-09	Stabilized	60	1	1.17379	1.37272	1.64168	1.73669
Q9P000	COMMD9	Homo sapiens	COMM domain-containing protein 9	0.233333	0.233333	0	1.03107	6.8218e-09	Stabilized	62	1	1.09189	1.05087	1.15384	0.938665
Q9P000	COMMD9	Homo sapiens	COMM domain-containing protein 9	0.233333	0.233333	0	1.03107	6.8218e-09	Stabilized	64	1	0.989894	1.12712	1.09097	1.07499
E7EQR4	EZR	Homo sapiens	Ezrin	0.216667	0.216667	0	1.25709	7.38901e-08	Solubility/Expression	42	1	2.80939	1.12811	1.33343	2.13357
E7EQR4	EZR	Homo sapiens	Ezrin	0.216667	0.216667	0	1.25709	7.38901e-08	Solubility/Expression	44	1	2.43648	0.938671	1.22691	1.89289
E7EQR4	EZR	Homo sapiens	Ezrin	0.216667	0.216667	0	1.25709	7.38901e-08	Solubility/Expression	46	1	1.98131	1.06907	1.37208	1.80427
E7EQR4	EZR	Homo sapiens	Ezrin	0.216667	0.216667	0	1.25709	7.38901e-08	Solubility/Expression	48	1	1.55615	1.21698	1.28782	1.30751
E7EQR4	EZR	Homo sapiens	Ezrin	0.216667	0.216667	0	1.25709	7.38901e-08	Solubility/Expression	50	1	1.17786	1.12004	1.15542	1.39419
E7EQR4	EZR	Homo sapiens	Ezrin	0.216667	0.216667	0	1.25709	7.38901e-08	Solubility/Expression	52	1	1.40232	1.24396	1.44014	1.37233
E7EQR4	EZR	Homo sapiens	Ezrin	0.216667	0.216667	0	1.25709	7.38901e-08	Solubility/Expression	54	1	0.959087	0.827764	0.829223	0.965665
E7EQR4	EZR	Homo sapiens	Ezrin	0.216667	0.216667	0	1.25709	7.38901e-08	Solubility/Expression	56	1	0.980459	0.927137	1.24218	1.39061
E7EQR4	EZR	Homo sapiens	Ezrin	0.216667	0.216667	0	1.25709	7.38901e-08	Solubility/Expression	58	1	1.01064	0.929706	1.22632	1.33028
E7EQR4	EZR	Homo sapiens	Ezrin	0.216667	0.216667	0	1.25709	7.38901e-08	Solubility/Expression	60	1	0.861107	0.883854	1.54918	1.72538
E7EQR4	EZR	Homo sapiens	Ezrin	0.216667	0.216667	0	1.25709	7.38901e-08	Solubility/Expression	62	1	1.08587	0.92241	1.62974	1.68107
E7EQR4	EZR	Homo sapiens	Ezrin	0.216667	0.216667	0	1.25709	7.38901e-08	Solubility/Expression	64	1	0.96042	0.896305	1.38325	1.4268
P84103	SRSF3	Homo sapiens	Serine/arginine-rich splicing factor 3	0.216667	0.216667	0	1.20418	7.38901e-08	Solubility/Expression	42	1	2.27197	1.35736	1.219	2.0699
P84103	SRSF3	Homo sapiens	Serine/arginine-rich splicing factor 3	0.216667	0.216667	0	1.20418	7.38901e-08	Solubility/Expression	44	1	2.67631	1.19484	1.47712	1.97638
P84103	SRSF3	Homo sapiens	Serine/arginine-rich splicing factor 3	0.216667	0.216667	0	1.20418	7.38901e-08	Solubility/Expression	46	1	2.25485	1.02754	1.21637	1.93237
P84103	SRSF3	Homo sapiens	Serine/arginine-rich splicing factor 3	0.216667	0.216667	0	1.20418	7.38901e-08	Solubility/Expression	48	1	1.05061	1.39779	1.24512	1.43396
P84103	SRSF3	Homo sapiens	Serine/arginine-rich splicing factor 3	0.216667	0.216667	0	1.20418	7.38901e-08	Solubility/Expression	50	1	1.10795	1.28799	1.29836	1.3459
P84103	SRSF3	Homo sapiens	Serine/arginine-rich splicing factor 3	0.216667	0.216667	0	1.20418	7.38901e-08	Solubility/Expression	52	1	1.25656	1.26678	1.08083	1.26695
P84103	SRSF3	Homo sapiens	Serine/arginine-rich splicing factor 3	0.216667	0.216667	0	1.20418	7.38901e-08	Solubility/Expression	54	1	0.840995	1.04286	0.974818	1.11239
P84103	SRSF3	Homo sapiens	Serine/arginine-rich splicing factor 3	0.216667	0.216667	0	1.20418	7.38901e-08	Solubility/Expression	56	1	1.0835	0.985668	0.925691	1.2157
P84103	SRSF3	Homo sapiens	Serine/arginine-rich splicing factor 3	0.216667	0.216667	0	1.20418	7.38901e-08	Solubility/Expression	58	1	1.09194	1.1908	1.06144	1.14519
P84103	SRSF3	Homo sapiens	Serine/arginine-rich splicing factor 3	0.216667	0.216667	0	1.20418	7.38901e-08	Solubility/Expression	60	1	1.05966	1.01714	0.891265	1.17169
P84103	SRSF3	Homo sapiens	Serine/arginine-rich splicing factor 3	0.216667	0.216667	0	1.20418	7.38901e-08	Solubility/Expression	62	1	1.26509	1.04902	0.964743	0.916198
P84103	SRSF3	Homo sapiens	Serine/arginine-rich splicing factor 3	0.216667	0.216667	0	1.20418	7.38901e-08	Solubility/Expression	64	1	0.930863	0.999897	0.763838	0.837535
P19338	NCL	Homo sapiens	Nucleolin	0.216667	0.216667	0	1.20354	7.38901e-08	Solubility/Expression	42	1	2.41782	1.11195	1.31246	1.87831
P19338	NCL	Homo sapiens	Nucleolin	0.216667	0.216667	0	1.20354	7.38901e-08	Solubility/Expression	44	1	2.6582	0.916726	1.31929	1.9854
P19338	NCL	Homo sapiens	Nucleolin	0.216667	0.216667	0	1.20354	7.38901e-08	Solubility/Expression	46	1	1.8589	0.958412	1.21711	1.60459
P19338	NCL	Homo sapiens	Nucleolin	0.216667	0.216667	0	1.20354	7.38901e-08	Solubility/Expression	48	1	1.54368	1.01207	1.4204	1.5843
P19338	NCL	Homo sapiens	Nucleolin	0.216667	0.216667	0	1.20354	7.38901e-08	Solubility/Expression	50	1	1.33801	1.2119	1.13534	1.27108
P19338	NCL	Homo sapiens	Nucleolin	0.216667	0.216667	0	1.20354	7.38901e-08	Solubility/Expression	52	1	0.994656	0.960289	0.911255	0.935229
P19338	NCL	Homo sapiens	Nucleolin	0.216667	0.216667	0	1.20354	7.38901e-08	Solubility/Expression	54	1	0.933257	0.964689	0.86472	0.945737
P19338	NCL	Homo sapiens	Nucleolin	0.216667	0.216667	0	1.20354	7.38901e-08	Solubility/Expression	56	1	0.969095	1.01627	0.830276	0.902664
P19338	NCL	Homo sapiens	Nucleolin	0.216667	0.216667	0	1.20354	7.38901e-08	Solubility/Expression	58	1	1.05116	1.05309	1.19933	1.30117
P19338	NCL	Homo sapiens	Nucleolin	0.216667	0.216667	0	1.20354	7.38901e-08	Solubility/Expression	60	1	0.889424	0.94954	1.10047	1.27167
P19338	NCL	Homo sapiens	Nucleolin	0.216667	0.216667	0	1.20354	7.38901e-08	Solubility/Expression	62	1	1.23636	1.10443	1.50497	1.61015
P19338	NCL	Homo sapiens	Nucleolin	0.216667	0.216667	0	1.20354	7.38901e-08	Solubility/Expression	64	1	0.981858	1.05478	1.39516	1.52467
P52565	ARHGDIA	Homo sapiens	Rho GDP-dissociation inhibitor 1	0.216667	0.216667	0	1.19134	7.38901e-08	Solubility/Expression	42	1	2.35211	0.883984	0.88685	1.80381
P52565	ARHGDIA	Homo sapiens	Rho GDP-dissociation inhibitor 1	0.216667	0.216667	0	1.19134	7.38901e-08	Solubility/Expression	44	1	1.0287	0.892908	1.07356	0.965216
P52565	ARHGDIA	Homo sapiens	Rho GDP-dissociation inhibitor 1	0.216667	0.216667	0	1.19134	7.38901e-08	Solubility/Expression	46	1	1.10839	0.954265	1.15207	1.04957
P52565	ARHGDIA	Homo sapiens	Rho GDP-dissociation inhibitor 1	0.216667	0.216667	0	1.19134	7.38901e-08	Solubility/Expression	48	1	1.17221	0.895605	1.30566	1.09946
P52565	ARHGDIA	Homo sapiens	Rho GDP-dissociation inhibitor 1	0.216667	0.216667	0	1.19134	7.38901e-08	Solubility/Expression	50	1	1.06312	1.09779	1.06846	1.34596
P52565	ARHGDIA	Homo sapiens	Rho GDP-dissociation inhibitor 1	0.216667	0.216667	0	1.19134	7.38901e-08	Solubility/Expression	52	1	1.00461	0.883648	0.96802	1.00153
P52565	ARHGDIA	Homo sapiens	Rho GDP-dissociation inhibitor 1	0.216667	0.216667	0	1.19134	7.38901e-08	Solubility/Expression	54	1	0.992844	0.907334	1.01623	1.03312
P52565	ARHGDIA	Homo sapiens	Rho GDP-dissociation inhibitor 1	0.216667	0.216667	0	1.19134	7.38901e-08	Solubility/Expression	56	1	0.98077	0.988121	1.22153	1.26139
P52565	ARHGDIA	Homo sapiens	Rho GDP-dissociation inhibitor 1	0.216667	0.216667	0	1.19134	7.38901e-08	Solubility/Expression	58	1	1.16778	0.995981	1.35613	1.4679
P52565	ARHGDIA	Homo sapiens	Rho GDP-dissociation inhibitor 1	0.216667	0.216667	0	1.19134	7.38901e-08	Solubility/Expression	60	1	0.905962	0.916275	1.57353	1.72114
P52565	ARHGDIA	Homo sapiens	Rho GDP-dissociation inhibitor 1	0.216667	0.216667	0	1.19134	7.38901e-08	Solubility/Expression	62	1	1.53463	1.0165	2.72423	3.00247
P52565	ARHGDIA	Homo sapiens	Rho GDP-dissociation inhibitor 1	0.216667	0.216667	0	1.19134	7.38901e-08	Solubility/Expression	64	1	1.11064	0.997045	1.67443	1.85673
P11413-2	G6PD	Homo sapiens	Isoform Long of Glucose-6-phosphate 1-dehydrogenase	0.216667	0.216667	0	1.17135	7.38901e-08	Stabilized	42	1	1.44357	1.14436	1.26103	1.47624
P11413-2	G6PD	Homo sapiens	Isoform Long of Glucose-6-phosphate 1-dehydrogenase	0.216667	0.216667	0	1.17135	7.38901e-08	Stabilized	44	1	1.45663	0.969877	0.989753	1.49792
P11413-2	G6PD	Homo sapiens	Isoform Long of Glucose-6-phosphate 1-dehydrogenase	0.216667	0.216667	0	1.17135	7.38901e-08	Stabilized	46	1	1.36494	1.16126	1.26294	1.45872
P11413-2	G6PD	Homo sapiens	Isoform Long of Glucose-6-phosphate 1-dehydrogenase	0.216667	0.216667	0	1.17135	7.38901e-08	Stabilized	48	1	1.37506	0.997819	1.2078	1.3486
P11413-2	G6PD	Homo sapiens	Isoform Long of Glucose-6-phosphate 1-dehydrogenase	0.216667	0.216667	0	1.17135	7.38901e-08	Stabilized	50	1	1.08734	1.13681	1.19258	1.22563
P11413-2	G6PD	Homo sapiens	Isoform Long of Glucose-6-phosphate 1-dehydrogenase	0.216667	0.216667	0	1.17135	7.38901e-08	Stabilized	52	1	1.07116	1.03521	1.09299	1.12208
P11413-2	G6PD	Homo sapiens	Isoform Long of Glucose-6-phosphate 1-dehydrogenase	0.216667	0.216667	0	1.17135	7.38901e-08	Stabilized	54	1	0.961472	1.03468	0.933687	0.995341
P11413-2	G6PD	Homo sapiens	Isoform Long of Glucose-6-phosphate 1-dehydrogenase	0.216667	0.216667	0	1.17135	7.38901e-08	Stabilized	56	1	0.97105	1.09702	1.10443	1.18034
P11413-2	G6PD	Homo sapiens	Isoform Long of Glucose-6-phosphate 1-dehydrogenase	0.216667	0.216667	0	1.17135	7.38901e-08	Stabilized	58	1	1.18036	1.07342	1.31761	1.6623
P11413-2	G6PD	Homo sapiens	Isoform Long of Glucose-6-phosphate 1-dehydrogenase	0.216667	0.216667	0	1.17135	7.38901e-08	Stabilized	60	1	0.806556	0.812312	1.73628	1.99246
P11413-2	G6PD	Homo sapiens	Isoform Long of Glucose-6-phosphate 1-dehydrogenase	0.216667	0.216667	0	1.17135	7.38901e-08	Stabilized	62	1	1.09271	0.911843	1.57101	1.65105
P11413-2	G6PD	Homo sapiens	Isoform Long of Glucose-6-phosphate 1-dehydrogenase	0.216667	0.216667	0	1.17135	7.38901e-08	Stabilized	64	1	0.997021	0.85307	1.44962	1.51479
P55209	NAP1L1	Homo sapiens	Nucleosome assembly protein 1-like 1	0.216667	0.216667	0	1.16814	7.38901e-08	Stabilized	42	1	1.00612	0.952876	0.989159	0.984227
P55209	NAP1L1	Homo sapiens	Nucleosome assembly protein 1-like 1	0.216667	0.216667	0	1.16814	7.38901e-08	Stabilized	44	1	1.00954	0.974367	1.02915	0.994255
P55209	NAP1L1	Homo sapiens	Nucleosome assembly protein 1-like 1	0.216667	0.216667	0	1.16814	7.38901e-08	Stabilized	46	1	1.05592	0.874425	1.11332	1.11152
P55209	NAP1L1	Homo sapiens	Nucleosome assembly protein 1-like 1	0.216667	0.216667	0	1.16814	7.38901e-08	Stabilized	48	1	0.975306	1.0135	1.00516	1.0027
P55209	NAP1L1	Homo sapiens	Nucleosome assembly protein 1-like 1	0.216667	0.216667	0	1.16814	7.38901e-08	Stabilized	50	1	0.985435	0.947463	0.928144	0.957573
P55209	NAP1L1	Homo sapiens	Nucleosome assembly protein 1-like 1	0.216667	0.216667	0	1.16814	7.38901e-08	Stabilized	52	1	0.942768	0.867269	0.88351	0.891882
P55209	NAP1L1	Homo sapiens	Nucleosome assembly protein 1-like 1	0.216667	0.216667	0	1.16814	7.38901e-08	Stabilized	54	1	0.993703	0.932702	1.08118	1.14408
P55209	NAP1L1	Homo sapiens	Nucleosome assembly protein 1-like 1	0.216667	0.216667	0	1.16814	7.38901e-08	Stabilized	56	1	0.86699	0.907678	1.00944	1.07452
P55209	NAP1L1	Homo sapiens	Nucleosome assembly protein 1-like 1	0.216667	0.216667	0	1.16814	7.38901e-08	Stabilized	58	1	1.01832	0.882546	1.38174	1.38619
P55209	NAP1L1	Homo sapiens	Nucleosome assembly protein 1-like 1	0.216667	0.216667	0	1.16814	7.38901e-08	Stabilized	60	1	1.08159	1.155	1.93061	2.06908
P55209	NAP1L1	Homo sapiens	Nucleosome assembly protein 1-like 1	0.216667	0.216667	0	1.16814	7.38901e-08	Stabilized	62	1	1.16792	1.06767	2.7253	3.13848
P55209	NAP1L1	Homo sapiens	Nucleosome assembly protein 1-like 1	0.216667	0.216667	0	1.16814	7.38901e-08	Stabilized	64	1	0.9903	1.04333	2.6023	2.94222
P43358	MAGEA4	Homo sapiens	Melanoma-associated antigen 4	0.216667	0.216667	0	1.15971	7.38901e-08	Stabilized	42	1	1.38246	0.986337	0.93086	1.42418
P43358	MAGEA4	Homo sapiens	Melanoma-associated antigen 4	0.216667	0.216667	0	1.15971	7.38901e-08	Stabilized	44	1	2.44629	1.15856	1.13698	1.89062
P43358	MAGEA4	Homo sapiens	Melanoma-associated antigen 4	0.216667	0.216667	0	1.15971	7.38901e-08	Stabilized	46	1	2.96547	1.25808	1.30696	2.13534
P43358	MAGEA4	Homo sapiens	Melanoma-associated antigen 4	0.216667	0.216667	0	1.15971	7.38901e-08	Stabilized	48	1	1.38101	1.29033	1.15113	1.26485
P43358	MAGEA4	Homo sapiens	Melanoma-associated antigen 4	0.216667	0.216667	0	1.15971	7.38901e-08	Stabilized	50	1	1.01701	0.968879	0.902281	1.04597
P43358	MAGEA4	Homo sapiens	Melanoma-associated antigen 4	0.216667	0.216667	0	1.15971	7.38901e-08	Stabilized	52	1	0.89975	0.780318	0.798774	0.819041
P43358	MAGEA4	Homo sapiens	Melanoma-associated antigen 4	0.216667	0.216667	0	1.15971	7.38901e-08	Stabilized	54	1	1.00354	1.02381	0.996953	1.15254
P43358	MAGEA4	Homo sapiens	Melanoma-associated antigen 4	0.216667	0.216667	0	1.15971	7.38901e-08	Stabilized	56	1	0.880394	0.897967	0.859852	0.909852
P43358	MAGEA4	Homo sapiens	Melanoma-associated antigen 4	0.216667	0.216667	0	1.15971	7.38901e-08	Stabilized	58	1	1.04924	1.01938	1.08008	1.23371
P43358	MAGEA4	Homo sapiens	Melanoma-associated antigen 4	0.216667	0.216667	0	1.15971	7.38901e-08	Stabilized	60	1	0.867379	0.96734	1.20822	1.39357
P43358	MAGEA4	Homo sapiens	Melanoma-associated antigen 4	0.216667	0.216667	0	1.15971	7.38901e-08	Stabilized	62	1	1.09404	0.960788	1.34671	1.45517
P43358	MAGEA4	Homo sapiens	Melanoma-associated antigen 4	0.216667	0.216667	0	1.15971	7.38901e-08	Stabilized	64	1	0.98207	1.0345	1.35044	1.47386
O95433	AHSA1	Homo sapiens	Activator of 90 kDa heat shock protein ATPase homolog 1	0.216667	0.216667	0	1.14887	7.38901e-08	Stabilized	42	1	1.52724	1.02628	1.12773	1.38025
O95433	AHSA1	Homo sapiens	Activator of 90 kDa heat shock protein ATPase homolog 1	0.216667	0.216667	0	1.14887	7.38901e-08	Stabilized	44	1	1.70166	0.959763	1.24874	1.38502
O95433	AHSA1	Homo sapiens	Activator of 90 kDa heat shock protein ATPase homolog 1	0.216667	0.216667	0	1.14887	7.38901e-08	Stabilized	46	1	1.67775	1.05563	1.04463	1.34242
O95433	AHSA1	Homo sapiens	Activator of 90 kDa heat shock protein ATPase homolog 1	0.216667	0.216667	0	1.14887	7.38901e-08	Stabilized	48	1	1.89878	1.15594	1.23664	1.41082
O95433	AHSA1	Homo sapiens	Activator of 90 kDa heat shock protein ATPase homolog 1	0.216667	0.216667	0	1.14887	7.38901e-08	Stabilized	50	1	1.62839	1.02889	1.04596	1.28993
O95433	AHSA1	Homo sapiens	Activator of 90 kDa heat shock protein ATPase homolog 1	0.216667	0.216667	0	1.14887	7.38901e-08	Stabilized	52	1	1.02719	0.903352	0.957349	0.929952
O95433	AHSA1	Homo sapiens	Activator of 90 kDa heat shock protein ATPase homolog 1	0.216667	0.216667	0	1.14887	7.38901e-08	Stabilized	54	1	1.00818	0.861382	1.02345	1.07438
O95433	AHSA1	Homo sapiens	Activator of 90 kDa heat shock protein ATPase homolog 1	0.216667	0.216667	0	1.14887	7.38901e-08	Stabilized	56	1	0.909922	0.879224	1.04896	1.04483
O95433	AHSA1	Homo sapiens	Activator of 90 kDa heat shock protein ATPase homolog 1	0.216667	0.216667	0	1.14887	7.38901e-08	Stabilized	58	1	1.06881	0.997995	1.31721	1.42082
O95433	AHSA1	Homo sapiens	Activator of 90 kDa heat shock protein ATPase homolog 1	0.216667	0.216667	0	1.14887	7.38901e-08	Stabilized	60	1	0.849847	0.895517	1.38334	1.51307
O95433	AHSA1	Homo sapiens	Activator of 90 kDa heat shock protein ATPase homolog 1	0.216667	0.216667	0	1.14887	7.38901e-08	Stabilized	62	1	1.02577	0.892522	1.26926	1.43825
O95433	AHSA1	Homo sapiens	Activator of 90 kDa heat shock protein ATPase homolog 1	0.216667	0.216667	0	1.14887	7.38901e-08	Stabilized	64	1	1.05977	0.968435	1.4912	1.49986
P49588	AARS	Homo sapiens	Alanine--tRNA ligase, cytoplasmic	0.216667	0.216667	0	1.13859	7.38901e-08	Solubility/Expression	42	1	1.69708	1.03	1.13961	1.52532
P49588	AARS	Homo sapiens	Alanine--tRNA ligase, cytoplasmic	0.216667	0.216667	0	1.13859	7.38901e-08	Solubility/Expression	44	1	1.41934	1.00047	1.12484	1.27748
P49588	AARS	Homo sapiens	Alanine--tRNA ligase, cytoplasmic	0.216667	0.216667	0	1.13859	7.38901e-08	Solubility/Expression	46	1	1.25861	1.00689	1.32244	1.18876
P49588	AARS	Homo sapiens	Alanine--tRNA ligase, cytoplasmic	0.216667	0.216667	0	1.13859	7.38901e-08	Solubility/Expression	48	1	1.1091	1.036	1.12193	1.05712
P49588	AARS	Homo sapiens	Alanine--tRNA ligase, cytoplasmic	0.216667	0.216667	0	1.13859	7.38901e-08	Solubility/Expression	50	1	0.994754	1.02661	1.06157	1.00104
P49588	AARS	Homo sapiens	Alanine--tRNA ligase, cytoplasmic	0.216667	0.216667	0	1.13859	7.38901e-08	Solubility/Expression	52	1	0.948623	0.973885	1.11188	1.12182
P49588	AARS	Homo sapiens	Alanine--tRNA ligase, cytoplasmic	0.216667	0.216667	0	1.13859	7.38901e-08	Solubility/Expression	54	1	0.969134	0.929971	1.22167	1.13881
P49588	AARS	Homo sapiens	Alanine--tRNA ligase, cytoplasmic	0.216667	0.216667	0	1.13859	7.38901e-08	Solubility/Expression	56	1	0.934741	1.07615	1.31762	1.24025
P49588	AARS	Homo sapiens	Alanine--tRNA ligase, cytoplasmic	0.216667	0.216667	0	1.13859	7.38901e-08	Solubility/Expression	58	1	1.13868	1.04814	1.5315	1.63822
P49588	AARS	Homo sapiens	Alanine--tRNA ligase, cytoplasmic	0.216667	0.216667	0	1.13859	7.38901e-08	Solubility/Expression	60	1	0.826555	0.853377	1.4252	1.59019
P49588	AARS	Homo sapiens	Alanine--tRNA ligase, cytoplasmic	0.216667	0.216667	0	1.13859	7.38901e-08	Solubility/Expression	62	1	1.15385	0.969804	1.49354	1.60801
P49588	AARS	Homo sapiens	Alanine--tRNA ligase, cytoplasmic	0.216667	0.216667	0	1.13859	7.38901e-08	Solubility/Expression	64	1	0.858657	0.896003	1.44617	1.45377
Q14019	COTL1	Homo sapiens	Coactosin-like protein	0.216667	0.216667	0	1.13566	7.38901e-08	Solubility/Expression	42	1	2.13514	1.12411	1.18009	1.83882
Q14019	COTL1	Homo sapiens	Coactosin-like protein	0.216667	0.216667	0	1.13566	7.38901e-08	Solubility/Expression	44	1	1.70387	0.803351	1.27112	1.4751
Q14019	COTL1	Homo sapiens	Coactosin-like protein	0.216667	0.216667	0	1.13566	7.38901e-08	Solubility/Expression	46	1	1.65364	1.10277	1.20492	1.44839
Q14019	COTL1	Homo sapiens	Coactosin-like protein	0.216667	0.216667	0	1.13566	7.38901e-08	Solubility/Expression	48	1	1.29623	1.11822	1.2852	1.15215
Q14019	COTL1	Homo sapiens	Coactosin-like protein	0.216667	0.216667	0	1.13566	7.38901e-08	Solubility/Expression	50	1	1.12502	1.07944	1.14398	1.05421
Q14019	COTL1	Homo sapiens	Coactosin-like protein	0.216667	0.216667	0	1.13566	7.38901e-08	Solubility/Expression	52	1	0.996534	1.10283	1.16257	0.991759
Q14019	COTL1	Homo sapiens	Coactosin-like protein	0.216667	0.216667	0	1.13566	7.38901e-08	Solubility/Expression	54	1	0.951056	0.991559	0.963193	0.928257
Q14019	COTL1	Homo sapiens	Coactosin-like protein	0.216667	0.216667	0	1.13566	7.38901e-08	Solubility/Expression	56	1	0.969328	1.03395	1.00252	0.866363
Q14019	COTL1	Homo sapiens	Coactosin-like protein	0.216667	0.216667	0	1.13566	7.38901e-08	Solubility/Expression	58	1	1.02682	0.94619	0.911735	0.956996
Q14019	COTL1	Homo sapiens	Coactosin-like protein	0.216667	0.216667	0	1.13566	7.38901e-08	Solubility/Expression	60	1	0.932938	0.97485	1.2202	1.2637
Q14019	COTL1	Homo sapiens	Coactosin-like protein	0.216667	0.216667	0	1.13566	7.38901e-08	Solubility/Expression	62	1	1.18955	0.978438	1.38664	1.54286
Q14019	COTL1	Homo sapiens	Coactosin-like protein	0.216667	0.216667	0	1.13566	7.38901e-08	Solubility/Expression	64	1	0.951702	1.00341	1.35918	1.33897
P26599-3	PTBP1	Homo sapiens	Isoform 3 of Polypyrimidine tract-binding protein 1	0.216667	0.216667	0	1.12861	7.38901e-08	Stabilized	42	1	1.28591	1.25516	1.1715	1.20884
P26599-3	PTBP1	Homo sapiens	Isoform 3 of Polypyrimidine tract-binding protein 1	0.216667	0.216667	0	1.12861	7.38901e-08	Stabilized	44	1	2.95291	1.13192	1.18798	2.15687
P26599-3	PTBP1	Homo sapiens	Isoform 3 of Polypyrimidine tract-binding protein 1	0.216667	0.216667	0	1.12861	7.38901e-08	Stabilized	46	1	1.75245	1.02575	0.992195	1.49097
P26599-3	PTBP1	Homo sapiens	Isoform 3 of Polypyrimidine tract-binding protein 1	0.216667	0.216667	0	1.12861	7.38901e-08	Stabilized	48	1	1.12476	1.09851	1.001	1.10827
P26599-3	PTBP1	Homo sapiens	Isoform 3 of Polypyrimidine tract-binding protein 1	0.216667	0.216667	0	1.12861	7.38901e-08	Stabilized	50	1	0.940882	0.977168	0.763913	0.771399
P26599-3	PTBP1	Homo sapiens	Isoform 3 of Polypyrimidine tract-binding protein 1	0.216667	0.216667	0	1.12861	7.38901e-08	Stabilized	52	1	0.989797	0.900867	0.881787	0.789307
P26599-3	PTBP1	Homo sapiens	Isoform 3 of Polypyrimidine tract-binding protein 1	0.216667	0.216667	0	1.12861	7.38901e-08	Stabilized	54	1	0.983674	0.8868	0.962519	1.0565
P26599-3	PTBP1	Homo sapiens	Isoform 3 of Polypyrimidine tract-binding protein 1	0.216667	0.216667	0	1.12861	7.38901e-08	Stabilized	56	1	0.999021	0.980987	0.904454	0.844998
P26599-3	PTBP1	Homo sapiens	Isoform 3 of Polypyrimidine tract-binding protein 1	0.216667	0.216667	0	1.12861	7.38901e-08	Stabilized	58	1	1.17318	0.953639	1.45788	1.57335
P26599-3	PTBP1	Homo sapiens	Isoform 3 of Polypyrimidine tract-binding protein 1	0.216667	0.216667	0	1.12861	7.38901e-08	Stabilized	60	1	0.892765	0.875543	1.14392	1.22441
P26599-3	PTBP1	Homo sapiens	Isoform 3 of Polypyrimidine tract-binding protein 1	0.216667	0.216667	0	1.12861	7.38901e-08	Stabilized	62	1	1.1423	1.01345	1.35689	1.59165
P26599-3	PTBP1	Homo sapiens	Isoform 3 of Polypyrimidine tract-binding protein 1	0.216667	0.216667	0	1.12861	7.38901e-08	Stabilized	64	1	1.08929	0.882407	1.29078	1.47596
P05455	SSB	Homo sapiens	Lupus La protein	0.216667	0.216667	0	1.12101	7.38901e-08	Stabilized	42	1	1.49819	1.09628	1.48898	1.41754
P05455	SSB	Homo sapiens	Lupus La protein	0.216667	0.216667	0	1.12101	7.38901e-08	Stabilized	44	1	1.22456	0.83927	0.978393	1.13709
P05455	SSB	Homo sapiens	Lupus La protein	0.216667	0.216667	0	1.12101	7.38901e-08	Stabilized	46	1	1.45335	1.05103	1.22452	1.31629
P05455	SSB	Homo sapiens	Lupus La protein	0.216667	0.216667	0	1.12101	7.38901e-08	Stabilized	48	1	1.01765	1.03751	1.0794	1.0271
P05455	SSB	Homo sapiens	Lupus La protein	0.216667	0.216667	0	1.12101	7.38901e-08	Stabilized	50	1	1.00396	1.01462	0.983338	0.9507
P05455	SSB	Homo sapiens	Lupus La protein	0.216667	0.216667	0	1.12101	7.38901e-08	Stabilized	52	1	0.996672	1.01505	0.976533	0.955896
P05455	SSB	Homo sapiens	Lupus La protein	0.216667	0.216667	0	1.12101	7.38901e-08	Stabilized	54	1	0.951013	0.958631	0.92669	0.879725
P05455	SSB	Homo sapiens	Lupus La protein	0.216667	0.216667	0	1.12101	7.38901e-08	Stabilized	56	1	0.960429	1.03396	0.860263	0.860959
P05455	SSB	Homo sapiens	Lupus La protein	0.216667	0.216667	0	1.12101	7.38901e-08	Stabilized	58	1	1.01642	1.04842	1.09751	1.23536
P05455	SSB	Homo sapiens	Lupus La protein	0.216667	0.216667	0	1.12101	7.38901e-08	Stabilized	60	1	0.9026	0.962843	1.20569	1.27337
P05455	SSB	Homo sapiens	Lupus La protein	0.216667	0.216667	0	1.12101	7.38901e-08	Stabilized	62	1	1.25078	1.08597	1.96538	2.19226
P05455	SSB	Homo sapiens	Lupus La protein	0.216667	0.216667	0	1.12101	7.38901e-08	Stabilized	64	1	0.963479	0.956116	1.83963	2.04891
Q9BPW8	NIPSNAP1	Homo sapiens	Protein NipSnap homolog 1	0.216667	0.216667	0	1.11806	7.38901e-08	Stabilized	42	1	1.03383	1.01081	1.02034	0.998419
Q9BPW8	NIPSNAP1	Homo sapiens	Protein NipSnap homolog 1	0.216667	0.216667	0	1.11806	7.38901e-08	Stabilized	44	1	1.00262	1.0205	1.01743	1.02174
Q9BPW8	NIPSNAP1	Homo sapiens	Protein NipSnap homolog 1	0.216667	0.216667	0	1.11806	7.38901e-08	Stabilized	46	1	0.985755	1.03017	1.05028	1.01586
Q9BPW8	NIPSNAP1	Homo sapiens	Protein NipSnap homolog 1	0.216667	0.216667	0	1.11806	7.38901e-08	Stabilized	48	1	0.992476	0.976122	1.06648	1.01422
Q9BPW8	NIPSNAP1	Homo sapiens	Protein NipSnap homolog 1	0.216667	0.216667	0	1.11806	7.38901e-08	Stabilized	50	1	1.07929	1.03757	1.12359	1.05222
Q9BPW8	NIPSNAP1	Homo sapiens	Protein NipSnap homolog 1	0.216667	0.216667	0	1.11806	7.38901e-08	Stabilized	52	1	1.01384	1.06498	1.21594	1.12541
Q9BPW8	NIPSNAP1	Homo sapiens	Protein NipSnap homolog 1	0.216667	0.216667	0	1.11806	7.38901e-08	Stabilized	54	1	0.970913	1.00237	1.11318	1.10497
Q9BPW8	NIPSNAP1	Homo sapiens	Protein NipSnap homolog 1	0.216667	0.216667	0	1.11806	7.38901e-08	Stabilized	56	1	0.959571	1.01217	1.10229	1.06353
Q9BPW8	NIPSNAP1	Homo sapiens	Protein NipSnap homolog 1	0.216667	0.216667	0	1.11806	7.38901e-08	Stabilized	58	1	1.07355	1.00266	1.25879	1.46302
Q9BPW8	NIPSNAP1	Homo sapiens	Protein NipSnap homolog 1	0.216667	0.216667	0	1.11806	7.38901e-08	Stabilized	60	1	1.09573	0.820625	1.45501	1.51301
Q9BPW8	NIPSNAP1	Homo sapiens	Protein NipSnap homolog 1	0.216667	0.216667	0	1.11806	7.38901e-08	Stabilized	62	1	1.24415	1.03235	1.99359	2.15115
Q9BPW8	NIPSNAP1	Homo sapiens	Protein NipSnap homolog 1	0.216667	0.216667	0	1.11806	7.38901e-08	Stabilized	64	1	1.13035	0.945347	1.76316	1.84196
P52597	HNRNPF	Homo sapiens	Heterogeneous nuclear ribonucleoprotein F	0.216667	0.216667	0	1.11245	7.38901e-08	Stabilized	42	1	1.36993	1.09523	1.05158	1.35039
P52597	HNRNPF	Homo sapiens	Heterogeneous nuclear ribonucleoprotein F	0.216667	0.216667	0	1.11245	7.38901e-08	Stabilized	44	1	1.69745	1.10327	1.18076	1.47291
P52597	HNRNPF	Homo sapiens	Heterogeneous nuclear ribonucleoprotein F	0.216667	0.216667	0	1.11245	7.38901e-08	Stabilized	46	1	1.98158	1.20247	1.29419	1.8196
P52597	HNRNPF	Homo sapiens	Heterogeneous nuclear ribonucleoprotein F	0.216667	0.216667	0	1.11245	7.38901e-08	Stabilized	48	1	1.21489	1.21938	1.22649	1.43856
P52597	HNRNPF	Homo sapiens	Heterogeneous nuclear ribonucleoprotein F	0.216667	0.216667	0	1.11245	7.38901e-08	Stabilized	50	1	1.03055	1.09711	0.934969	1.06061
P52597	HNRNPF	Homo sapiens	Heterogeneous nuclear ribonucleoprotein F	0.216667	0.216667	0	1.11245	7.38901e-08	Stabilized	52	1	0.992698	0.925746	0.844272	0.769192
P52597	HNRNPF	Homo sapiens	Heterogeneous nuclear ribonucleoprotein F	0.216667	0.216667	0	1.11245	7.38901e-08	Stabilized	54	1	0.848278	0.894179	0.827625	0.967414
P52597	HNRNPF	Homo sapiens	Heterogeneous nuclear ribonucleoprotein F	0.216667	0.216667	0	1.11245	7.38901e-08	Stabilized	56	1	0.86634	0.852312	0.776887	0.787499
P52597	HNRNPF	Homo sapiens	Heterogeneous nuclear ribonucleoprotein F	0.216667	0.216667	0	1.11245	7.38901e-08	Stabilized	58	1	0.986714	0.915015	1.19874	1.40781
P52597	HNRNPF	Homo sapiens	Heterogeneous nuclear ribonucleoprotein F	0.216667	0.216667	0	1.11245	7.38901e-08	Stabilized	60	1	0.989253	1.04572	1.11305	1.3185
P52597	HNRNPF	Homo sapiens	Heterogeneous nuclear ribonucleoprotein F	0.216667	0.216667	0	1.11245	7.38901e-08	Stabilized	62	1	1.03441	1.0723	1.33331	1.42688
P52597	HNRNPF	Homo sapiens	Heterogeneous nuclear ribonucleoprotein F	0.216667	0.216667	0	1.11245	7.38901e-08	Stabilized	64	1	0.955528	0.912505	1.33504	1.50765
Q13501	SQSTM1	Homo sapiens	Sequestosome-1	0.216667	0.216667	0	1.10699	7.38901e-08	Stabilized	42	1	1.05189	0.951596	0.959507	0.924013
Q13501	SQSTM1	Homo sapiens	Sequestosome-1	0.216667	0.216667	0	1.10699	7.38901e-08	Stabilized	44	1	1.01402	0.95967	0.965924	0.889189
Q13501	SQSTM1	Homo sapiens	Sequestosome-1	0.216667	0.216667	0	1.10699	7.38901e-08	Stabilized	46	1	0.995644	0.947159	0.94564	0.932275
Q13501	SQSTM1	Homo sapiens	Sequestosome-1	0.216667	0.216667	0	1.10699	7.38901e-08	Stabilized	48	1	0.96846	0.967158	0.979415	0.890891
Q13501	SQSTM1	Homo sapiens	Sequestosome-1	0.216667	0.216667	0	1.10699	7.38901e-08	Stabilized	50	1	0.854535	0.866829	0.853442	0.789696
Q13501	SQSTM1	Homo sapiens	Sequestosome-1	0.216667	0.216667	0	1.10699	7.38901e-08	Stabilized	52	1	0.879573	0.743168	0.833192	0.792961
Q13501	SQSTM1	Homo sapiens	Sequestosome-1	0.216667	0.216667	0	1.10699	7.38901e-08	Stabilized	54	1	0.970088	1.00881	1.14033	1.13807
Q13501	SQSTM1	Homo sapiens	Sequestosome-1	0.216667	0.216667	0	1.10699	7.38901e-08	Stabilized	56	1	1.22261	1.06392	1.20038	1.35159
Q13501	SQSTM1	Homo sapiens	Sequestosome-1	0.216667	0.216667	0	1.10699	7.38901e-08	Stabilized	58	1	1.35228	0.988658	1.38637	1.23723
Q13501	SQSTM1	Homo sapiens	Sequestosome-1	0.216667	0.216667	0	1.10699	7.38901e-08	Stabilized	60	1	1.23089	1.19066	1.95842	2.06935
Q13501	SQSTM1	Homo sapiens	Sequestosome-1	0.216667	0.216667	0	1.10699	7.38901e-08	Stabilized	62	1	1.17105	1.08259	2.04964	2.11561
Q13501	SQSTM1	Homo sapiens	Sequestosome-1	0.216667	0.216667	0	1.10699	7.38901e-08	Stabilized	64	1	1.12893	0.902522	1.66567	1.83793
P49419-2	ALDH7A1	Homo sapiens	Isoform 2 of Alpha-aminoadipic semialdehyde dehydrogenase	0.216667	0.216667	0	1.1005	7.38901e-08	Stabilized	42	1	1.08856	1.09436	1.12114	1.14024
P49419-2	ALDH7A1	Homo sapiens	Isoform 2 of Alpha-aminoadipic semialdehyde dehydrogenase	0.216667	0.216667	0	1.1005	7.38901e-08	Stabilized	44	1	0.987196	1.03267	1.04314	1.00467
P49419-2	ALDH7A1	Homo sapiens	Isoform 2 of Alpha-aminoadipic semialdehyde dehydrogenase	0.216667	0.216667	0	1.1005	7.38901e-08	Stabilized	46	1	1.01639	1.08462	1.06817	1.01135
P49419-2	ALDH7A1	Homo sapiens	Isoform 2 of Alpha-aminoadipic semialdehyde dehydrogenase	0.216667	0.216667	0	1.1005	7.38901e-08	Stabilized	48	1	0.976062	0.99594	1.03705	0.996648
P49419-2	ALDH7A1	Homo sapiens	Isoform 2 of Alpha-aminoadipic semialdehyde dehydrogenase	0.216667	0.216667	0	1.1005	7.38901e-08	Stabilized	50	1	1.01536	1.07374	1.09451	1.01419
P49419-2	ALDH7A1	Homo sapiens	Isoform 2 of Alpha-aminoadipic semialdehyde dehydrogenase	0.216667	0.216667	0	1.1005	7.38901e-08	Stabilized	52	1	0.996571	1.07392	1.1301	1.08813
P49419-2	ALDH7A1	Homo sapiens	Isoform 2 of Alpha-aminoadipic semialdehyde dehydrogenase	0.216667	0.216667	0	1.1005	7.38901e-08	Stabilized	54	1	0.997907	1.07397	1.03635	0.94568
P49419-2	ALDH7A1	Homo sapiens	Isoform 2 of Alpha-aminoadipic semialdehyde dehydrogenase	0.216667	0.216667	0	1.1005	7.38901e-08	Stabilized	56	1	0.976351	1.1137	1.09679	1.03437
P49419-2	ALDH7A1	Homo sapiens	Isoform 2 of Alpha-aminoadipic semialdehyde dehydrogenase	0.216667	0.216667	0	1.1005	7.38901e-08	Stabilized	58	1	1.13142	1.06428	1.24261	1.18779
P49419-2	ALDH7A1	Homo sapiens	Isoform 2 of Alpha-aminoadipic semialdehyde dehydrogenase	0.216667	0.216667	0	1.1005	7.38901e-08	Stabilized	60	1	0.975968	0.925095	1.24837	1.44444
P49419-2	ALDH7A1	Homo sapiens	Isoform 2 of Alpha-aminoadipic semialdehyde dehydrogenase	0.216667	0.216667	0	1.1005	7.38901e-08	Stabilized	62	1	1.43906	1.03321	1.74836	1.81169
P49419-2	ALDH7A1	Homo sapiens	Isoform 2 of Alpha-aminoadipic semialdehyde dehydrogenase	0.216667	0.216667	0	1.1005	7.38901e-08	Stabilized	64	1	1.20435	1.04499	1.53979	1.52857
P15848	ARSB	Homo sapiens	Arylsulfatase B	0.216667	0.216667	0	1.1002	7.38901e-08	Stabilized	42	1	1.37359	0.862062	1.42731	1.39976
P15848	ARSB	Homo sapiens	Arylsulfatase B	0.216667	0.216667	0	1.1002	7.38901e-08	Stabilized	44	1	0.97092	0.925256	1.54683	0.903594
P15848	ARSB	Homo sapiens	Arylsulfatase B	0.216667	0.216667	0	1.1002	7.38901e-08	Stabilized	46	1	0.996924	0.946418	1.38208	1.19925
P15848	ARSB	Homo sapiens	Arylsulfatase B	0.216667	0.216667	0	1.1002	7.38901e-08	Stabilized	48	1	1.27835	1.00521	0.824014	0.999024
P15848	ARSB	Homo sapiens	Arylsulfatase B	0.216667	0.216667	0	1.1002	7.38901e-08	Stabilized	50	1	1.02094	1.02884	1.48353	0.919489
P15848	ARSB	Homo sapiens	Arylsulfatase B	0.216667	0.216667	0	1.1002	7.38901e-08	Stabilized	52	1	0.960882	0.810912	0.915373	0.891296
P15848	ARSB	Homo sapiens	Arylsulfatase B	0.216667	0.216667	0	1.1002	7.38901e-08	Stabilized	54	1	1.0056	0.873571	1.15119	1.01569
P15848	ARSB	Homo sapiens	Arylsulfatase B	0.216667	0.216667	0	1.1002	7.38901e-08	Stabilized	56	1	1.05771	1.09589	1.11752	1.20393
P15848	ARSB	Homo sapiens	Arylsulfatase B	0.216667	0.216667	0	1.1002	7.38901e-08	Stabilized	58	1	0.899156	0.93292	1.72411	1.83711
P15848	ARSB	Homo sapiens	Arylsulfatase B	0.216667	0.216667	0	1.1002	7.38901e-08	Stabilized	60	1	1.77772	1.30935	1.71239	1.37285
P15848	ARSB	Homo sapiens	Arylsulfatase B	0.216667	0.216667	0	1.1002	7.38901e-08	Stabilized	62	1	0.951714	1.04381	0.882734	1.10317
P15848	ARSB	Homo sapiens	Arylsulfatase B	0.216667	0.216667	0	1.1002	7.38901e-08	Stabilized	64	1	0.862075	1.06399	0.964256	0.981778
O00629	KPNA4	Homo sapiens	Importin subunit alpha-3	0.216667	0.216667	0	1.09865	7.38901e-08	Stabilized	42	1	1.0414	0.967882	1.02322	0.988148
O00629	KPNA4	Homo sapiens	Importin subunit alpha-3	0.216667	0.216667	0	1.09865	7.38901e-08	Stabilized	44	1	1.03552	1.01106	1.04981	0.969312
O00629	KPNA4	Homo sapiens	Importin subunit alpha-3	0.216667	0.216667	0	1.09865	7.38901e-08	Stabilized	46	1	1.01264	1.00738	1.03742	0.995972
O00629	KPNA4	Homo sapiens	Importin subunit alpha-3	0.216667	0.216667	0	1.09865	7.38901e-08	Stabilized	48	1	0.969359	0.961627	1.02566	0.991292
O00629	KPNA4	Homo sapiens	Importin subunit alpha-3	0.216667	0.216667	0	1.09865	7.38901e-08	Stabilized	50	1	1.0283	1.00263	1.0275	0.97118
O00629	KPNA4	Homo sapiens	Importin subunit alpha-3	0.216667	0.216667	0	1.09865	7.38901e-08	Stabilized	52	1	1.04549	1.03077	1.02673	1.03086
O00629	KPNA4	Homo sapiens	Importin subunit alpha-3	0.216667	0.216667	0	1.09865	7.38901e-08	Stabilized	54	1	0.989028	0.917147	0.94184	0.896393
O00629	KPNA4	Homo sapiens	Importin subunit alpha-3	0.216667	0.216667	0	1.09865	7.38901e-08	Stabilized	56	1	1.01048	1.08674	1.00546	1.00878
O00629	KPNA4	Homo sapiens	Importin subunit alpha-3	0.216667	0.216667	0	1.09865	7.38901e-08	Stabilized	58	1	1.14282	1.09099	1.1909	1.19349
O00629	KPNA4	Homo sapiens	Importin subunit alpha-3	0.216667	0.216667	0	1.09865	7.38901e-08	Stabilized	60	1	0.848352	0.868019	1.2542	1.33442
O00629	KPNA4	Homo sapiens	Importin subunit alpha-3	0.216667	0.216667	0	1.09865	7.38901e-08	Stabilized	62	1	1.23426	0.986028	1.78346	2.30916
O00629	KPNA4	Homo sapiens	Importin subunit alpha-3	0.216667	0.216667	0	1.09865	7.38901e-08	Stabilized	64	1	1.13603	1.15942	2.04669	2.23373
P14868	DARS	Homo sapiens	Aspartate--tRNA ligase, cytoplasmic	0.216667	0.216667	0	1.08268	7.38901e-08	Stabilized	42	1	1.24502	1.05395	1.28687	1.14936
P14868	DARS	Homo sapiens	Aspartate--tRNA ligase, cytoplasmic	0.216667	0.216667	0	1.08268	7.38901e-08	Stabilized	44	1	1.10206	0.961154	0.938471	1.02992
P14868	DARS	Homo sapiens	Aspartate--tRNA ligase, cytoplasmic	0.216667	0.216667	0	1.08268	7.38901e-08	Stabilized	46	1	0.98105	0.984999	1.0086	0.990975
P14868	DARS	Homo sapiens	Aspartate--tRNA ligase, cytoplasmic	0.216667	0.216667	0	1.08268	7.38901e-08	Stabilized	48	1	0.968386	1.01204	1.01986	1.04822
P14868	DARS	Homo sapiens	Aspartate--tRNA ligase, cytoplasmic	0.216667	0.216667	0	1.08268	7.38901e-08	Stabilized	50	1	0.938316	0.90826	0.913776	0.949464
P14868	DARS	Homo sapiens	Aspartate--tRNA ligase, cytoplasmic	0.216667	0.216667	0	1.08268	7.38901e-08	Stabilized	52	1	0.929159	0.896711	0.960846	0.983019
P14868	DARS	Homo sapiens	Aspartate--tRNA ligase, cytoplasmic	0.216667	0.216667	0	1.08268	7.38901e-08	Stabilized	54	1	0.954746	0.97311	1.01667	1.02231
P14868	DARS	Homo sapiens	Aspartate--tRNA ligase, cytoplasmic	0.216667	0.216667	0	1.08268	7.38901e-08	Stabilized	56	1	0.94798	0.970344	1.08858	1.0814
P14868	DARS	Homo sapiens	Aspartate--tRNA ligase, cytoplasmic	0.216667	0.216667	0	1.08268	7.38901e-08	Stabilized	58	1	0.948632	0.99473	1.12823	1.14137
P14868	DARS	Homo sapiens	Aspartate--tRNA ligase, cytoplasmic	0.216667	0.216667	0	1.08268	7.38901e-08	Stabilized	60	1	1.08086	1.10302	1.052	1.20242
P14868	DARS	Homo sapiens	Aspartate--tRNA ligase, cytoplasmic	0.216667	0.216667	0	1.08268	7.38901e-08	Stabilized	62	1	1.50924	1.45034	1.4381	2.00883
P14868	DARS	Homo sapiens	Aspartate--tRNA ligase, cytoplasmic	0.216667	0.216667	0	1.08268	7.38901e-08	Stabilized	64	1	1.10208	1.02605	1.66155	1.79793
Q13200	PSMD2	Homo sapiens	26S proteasome non-ATPase regulatory subunit 2	0.216667	0.216667	0	1.07949	7.38901e-08	Stabilized	42	1	1.36918	1.0844	1.25835	1.24107
Q13200	PSMD2	Homo sapiens	26S proteasome non-ATPase regulatory subunit 2	0.216667	0.216667	0	1.07949	7.38901e-08	Stabilized	44	1	1.28519	0.969052	1.12788	1.17244
Q13200	PSMD2	Homo sapiens	26S proteasome non-ATPase regulatory subunit 2	0.216667	0.216667	0	1.07949	7.38901e-08	Stabilized	46	1	1.21242	0.958455	0.974737	1.12091
Q13200	PSMD2	Homo sapiens	26S proteasome non-ATPase regulatory subunit 2	0.216667	0.216667	0	1.07949	7.38901e-08	Stabilized	48	1	1.07021	1.00936	1.07236	1.05105
Q13200	PSMD2	Homo sapiens	26S proteasome non-ATPase regulatory subunit 2	0.216667	0.216667	0	1.07949	7.38901e-08	Stabilized	50	1	0.992445	0.92669	0.952237	0.975612
Q13200	PSMD2	Homo sapiens	26S proteasome non-ATPase regulatory subunit 2	0.216667	0.216667	0	1.07949	7.38901e-08	Stabilized	52	1	0.95616	0.903206	0.969659	1.01119
Q13200	PSMD2	Homo sapiens	26S proteasome non-ATPase regulatory subunit 2	0.216667	0.216667	0	1.07949	7.38901e-08	Stabilized	54	1	0.984476	0.975644	1.05086	1.05104
Q13200	PSMD2	Homo sapiens	26S proteasome non-ATPase regulatory subunit 2	0.216667	0.216667	0	1.07949	7.38901e-08	Stabilized	56	1	0.908862	0.945032	1.05713	1.07378
Q13200	PSMD2	Homo sapiens	26S proteasome non-ATPase regulatory subunit 2	0.216667	0.216667	0	1.07949	7.38901e-08	Stabilized	58	1	0.998223	0.976488	1.16075	1.19737
Q13200	PSMD2	Homo sapiens	26S proteasome non-ATPase regulatory subunit 2	0.216667	0.216667	0	1.07949	7.38901e-08	Stabilized	60	1	0.81834	0.904438	1.13607	1.36936
Q13200	PSMD2	Homo sapiens	26S proteasome non-ATPase regulatory subunit 2	0.216667	0.216667	0	1.07949	7.38901e-08	Stabilized	62	1	1.1005	0.979536	1.45817	1.63051
Q13200	PSMD2	Homo sapiens	26S proteasome non-ATPase regulatory subunit 2	0.216667	0.216667	0	1.07949	7.38901e-08	Stabilized	64	1	1.05002	0.984079	1.63265	1.6618
Q9NUL5	RYDEN	Homo sapiens	Repressor of yield of DENV protein	0.216667	0.216667	0	1.07888	7.38901e-08	Stabilized	42	1	0.89866	1.15543	1.09514	1.10527
Q9NUL5	RYDEN	Homo sapiens	Repressor of yield of DENV protein	0.216667	0.216667	0	1.07888	7.38901e-08	Stabilized	44	1	0.818053	0.783043	0.954495	0.85316
Q9NUL5	RYDEN	Homo sapiens	Repressor of yield of DENV protein	0.216667	0.216667	0	1.07888	7.38901e-08	Stabilized	46	1	0.757477	0.705274	0.904977	0.969975
Q9NUL5	RYDEN	Homo sapiens	Repressor of yield of DENV protein	0.216667	0.216667	0	1.07888	7.38901e-08	Stabilized	48	1	1.02434	1.19197	1.46521	1.31446
Q9NUL5	RYDEN	Homo sapiens	Repressor of yield of DENV protein	0.216667	0.216667	0	1.07888	7.38901e-08	Stabilized	50	1	1.17315	0.922308	0.870833	1.23984
Q9NUL5	RYDEN	Homo sapiens	Repressor of yield of DENV protein	0.216667	0.216667	0	1.07888	7.38901e-08	Stabilized	52	1	1.18354	1.10033	0.759122	0.915351
Q9NUL5	RYDEN	Homo sapiens	Repressor of yield of DENV protein	0.216667	0.216667	0	1.07888	7.38901e-08	Stabilized	54	1	1.08885	1.17904	0.815595	1.15036
Q9NUL5	RYDEN	Homo sapiens	Repressor of yield of DENV protein	0.216667	0.216667	0	1.07888	7.38901e-08	Stabilized	56	1	1.02612	1.04281	1.0942	1.06814
Q9NUL5	RYDEN	Homo sapiens	Repressor of yield of DENV protein	0.216667	0.216667	0	1.07888	7.38901e-08	Stabilized	58	1	1.19837	1.01191	0.986444	1.16414
Q9NUL5	RYDEN	Homo sapiens	Repressor of yield of DENV protein	0.216667	0.216667	0	1.07888	7.38901e-08	Stabilized	60	1	1.62201	1.76295	1.16162	1.48214
Q9NUL5	RYDEN	Homo sapiens	Repressor of yield of DENV protein	0.216667	0.216667	0	1.07888	7.38901e-08	Stabilized	62	1	1.59019	1.65703	1.21908	1.25062
Q9NUL5	RYDEN	Homo sapiens	Repressor of yield of DENV protein	0.216667	0.216667	0	1.07888	7.38901e-08	Stabilized	64	NaN	NaN	NaN	NaN	NaN
P11387	TOP1	Homo sapiens	DNA topoisomerase 1	0.216667	0.216667	0	1.06955	7.38901e-08	Stabilized	42	1	1.11447	1.08712	1.08012	1.05176
P11387	TOP1	Homo sapiens	DNA topoisomerase 1	0.216667	0.216667	0	1.06955	7.38901e-08	Stabilized	44	1	1.03944	1.02972	1.13073	1.00376
P11387	TOP1	Homo sapiens	DNA topoisomerase 1	0.216667	0.216667	0	1.06955	7.38901e-08	Stabilized	46	1	0.907807	0.90137	0.996777	1.00058
P11387	TOP1	Homo sapiens	DNA topoisomerase 1	0.216667	0.216667	0	1.06955	7.38901e-08	Stabilized	48	1	1.0388	1.03118	1.02765	1.12916
P11387	TOP1	Homo sapiens	DNA topoisomerase 1	0.216667	0.216667	0	1.06955	7.38901e-08	Stabilized	50	NaN	NaN	NaN	NaN	NaN
P11387	TOP1	Homo sapiens	DNA topoisomerase 1	0.216667	0.216667	0	1.06955	7.38901e-08	Stabilized	52	NaN	NaN	NaN	NaN	NaN
P11387	TOP1	Homo sapiens	DNA topoisomerase 1	0.216667	0.216667	0	1.06955	7.38901e-08	Stabilized	54	NaN	NaN	NaN	NaN	NaN
P11387	TOP1	Homo sapiens	DNA topoisomerase 1	0.216667	0.216667	0	1.06955	7.38901e-08	Stabilized	56	NaN	NaN	NaN	NaN	NaN
P11387	TOP1	Homo sapiens	DNA topoisomerase 1	0.216667	0.216667	0	1.06955	7.38901e-08	Stabilized	58	1	1.05811	1.06102	1.19171	1.23239
P11387	TOP1	Homo sapiens	DNA topoisomerase 1	0.216667	0.216667	0	1.06955	7.38901e-08	Stabilized	60	1	0.904775	1.00814	1.34527	1.48908
P11387	TOP1	Homo sapiens	DNA topoisomerase 1	0.216667	0.216667	0	1.06955	7.38901e-08	Stabilized	62	1	1.05451	1.033	1.41911	1.5657
P11387	TOP1	Homo sapiens	DNA topoisomerase 1	0.216667	0.216667	0	1.06955	7.38901e-08	Stabilized	64	1	1.01693	0.959179	1.59876	1.66513
Q13564-4	NAE1	Homo sapiens	Isoform 4 of NEDD8-activating enzyme E1 regulatory subunit	0.216667	0.216667	0	1.05494	7.38901e-08	Stabilized	42	1	1.05257	1.05539	1.04637	1.08521
Q13564-4	NAE1	Homo sapiens	Isoform 4 of NEDD8-activating enzyme E1 regulatory subunit	0.216667	0.216667	0	1.05494	7.38901e-08	Stabilized	44	1	0.98142	1.00198	1.01194	0.998206
Q13564-4	NAE1	Homo sapiens	Isoform 4 of NEDD8-activating enzyme E1 regulatory subunit	0.216667	0.216667	0	1.05494	7.38901e-08	Stabilized	46	1	1.04985	1.06238	1.03619	1.00294
Q13564-4	NAE1	Homo sapiens	Isoform 4 of NEDD8-activating enzyme E1 regulatory subunit	0.216667	0.216667	0	1.05494	7.38901e-08	Stabilized	48	1	0.997318	1.01004	1.01622	0.984111
Q13564-4	NAE1	Homo sapiens	Isoform 4 of NEDD8-activating enzyme E1 regulatory subunit	0.216667	0.216667	0	1.05494	7.38901e-08	Stabilized	50	1	1.01145	1.03444	1.0639	1.03423
Q13564-4	NAE1	Homo sapiens	Isoform 4 of NEDD8-activating enzyme E1 regulatory subunit	0.216667	0.216667	0	1.05494	7.38901e-08	Stabilized	52	1	0.945269	0.913639	1.07498	1.05421
Q13564-4	NAE1	Homo sapiens	Isoform 4 of NEDD8-activating enzyme E1 regulatory subunit	0.216667	0.216667	0	1.05494	7.38901e-08	Stabilized	54	1	0.949475	0.935884	1.13467	1.22797
Q13564-4	NAE1	Homo sapiens	Isoform 4 of NEDD8-activating enzyme E1 regulatory subunit	0.216667	0.216667	0	1.05494	7.38901e-08	Stabilized	56	1	0.985805	0.952851	1.29095	1.20316
Q13564-4	NAE1	Homo sapiens	Isoform 4 of NEDD8-activating enzyme E1 regulatory subunit	0.216667	0.216667	0	1.05494	7.38901e-08	Stabilized	58	1	0.925705	0.925516	1.3357	1.68634
Q13564-4	NAE1	Homo sapiens	Isoform 4 of NEDD8-activating enzyme E1 regulatory subunit	0.216667	0.216667	0	1.05494	7.38901e-08	Stabilized	60	1	0.822341	0.86398	1.17863	1.22345
Q13564-4	NAE1	Homo sapiens	Isoform 4 of NEDD8-activating enzyme E1 regulatory subunit	0.216667	0.216667	0	1.05494	7.38901e-08	Stabilized	62	1	1.05501	1.05956	1.44829	1.66724
Q13564-4	NAE1	Homo sapiens	Isoform 4 of NEDD8-activating enzyme E1 regulatory subunit	0.216667	0.216667	0	1.05494	7.38901e-08	Stabilized	64	1	0.824153	0.774154	1.10934	1.19214
Q8NBF2	NHLRC2	Homo sapiens	NHL repeat-containing protein 2	0.216667	0.216667	0	1.04722	7.38901e-08	Stabilized	42	1	1.03335	0.986087	1.03573	1.06358
Q8NBF2	NHLRC2	Homo sapiens	NHL repeat-containing protein 2	0.216667	0.216667	0	1.04722	7.38901e-08	Stabilized	44	1	0.985541	0.994144	0.99422	1.01037
Q8NBF2	NHLRC2	Homo sapiens	NHL repeat-containing protein 2	0.216667	0.216667	0	1.04722	7.38901e-08	Stabilized	46	1	1.02523	1.01775	1.02665	1.02275
Q8NBF2	NHLRC2	Homo sapiens	NHL repeat-containing protein 2	0.216667	0.216667	0	1.04722	7.38901e-08	Stabilized	48	1	0.980741	0.994606	0.945511	0.975989
Q8NBF2	NHLRC2	Homo sapiens	NHL repeat-containing protein 2	0.216667	0.216667	0	1.04722	7.38901e-08	Stabilized	50	1	1.04667	1.03285	1.06009	1.09542
Q8NBF2	NHLRC2	Homo sapiens	NHL repeat-containing protein 2	0.216667	0.216667	0	1.04722	7.38901e-08	Stabilized	52	1	0.987153	0.945365	1.02384	1.07206
Q8NBF2	NHLRC2	Homo sapiens	NHL repeat-containing protein 2	0.216667	0.216667	0	1.04722	7.38901e-08	Stabilized	54	1	1.02593	0.899699	1.05343	1.11878
Q8NBF2	NHLRC2	Homo sapiens	NHL repeat-containing protein 2	0.216667	0.216667	0	1.04722	7.38901e-08	Stabilized	56	1	1.04345	0.912534	1.1152	1.15911
Q8NBF2	NHLRC2	Homo sapiens	NHL repeat-containing protein 2	0.216667	0.216667	0	1.04722	7.38901e-08	Stabilized	58	1	0.979791	0.861101	1.14132	1.2828
Q8NBF2	NHLRC2	Homo sapiens	NHL repeat-containing protein 2	0.216667	0.216667	0	1.04722	7.38901e-08	Stabilized	60	1	0.90215	0.904159	1.7242	1.88784
Q8NBF2	NHLRC2	Homo sapiens	NHL repeat-containing protein 2	0.216667	0.216667	0	1.04722	7.38901e-08	Stabilized	62	1	0.818075	0.748608	1.27951	1.22932
Q8NBF2	NHLRC2	Homo sapiens	NHL repeat-containing protein 2	0.216667	0.216667	0	1.04722	7.38901e-08	Stabilized	64	1	0.904258	0.990787	1.21986	1.27583
Q13555-11	CAMK2G	Homo sapiens	Isoform 11 of Calcium/calmodulin-dependent protein kinase type II subunit gamma	0.216667	0.216667	0	1.03973	7.38901e-08	Stabilized	42	1	0.981687	0.972353	1.02564	0.945474
Q13555-11	CAMK2G	Homo sapiens	Isoform 11 of Calcium/calmodulin-dependent protein kinase type II subunit gamma	0.216667	0.216667	0	1.03973	7.38901e-08	Stabilized	44	1	0.982599	1.02173	1.0351	0.949198
Q13555-11	CAMK2G	Homo sapiens	Isoform 11 of Calcium/calmodulin-dependent protein kinase type II subunit gamma	0.216667	0.216667	0	1.03973	7.38901e-08	Stabilized	46	1	0.971711	0.988499	0.987478	0.953005
Q13555-11	CAMK2G	Homo sapiens	Isoform 11 of Calcium/calmodulin-dependent protein kinase type II subunit gamma	0.216667	0.216667	0	1.03973	7.38901e-08	Stabilized	48	1	0.964121	0.967891	0.997036	1.02342
Q13555-11	CAMK2G	Homo sapiens	Isoform 11 of Calcium/calmodulin-dependent protein kinase type II subunit gamma	0.216667	0.216667	0	1.03973	7.38901e-08	Stabilized	50	1	0.861363	0.814342	0.824652	0.794281
Q13555-11	CAMK2G	Homo sapiens	Isoform 11 of Calcium/calmodulin-dependent protein kinase type II subunit gamma	0.216667	0.216667	0	1.03973	7.38901e-08	Stabilized	52	1	0.841512	0.744845	0.832598	0.814543
Q13555-11	CAMK2G	Homo sapiens	Isoform 11 of Calcium/calmodulin-dependent protein kinase type II subunit gamma	0.216667	0.216667	0	1.03973	7.38901e-08	Stabilized	54	1	0.990878	0.798554	1.05495	1.03016
Q13555-11	CAMK2G	Homo sapiens	Isoform 11 of Calcium/calmodulin-dependent protein kinase type II subunit gamma	0.216667	0.216667	0	1.03973	7.38901e-08	Stabilized	56	1	0.989665	0.883587	1.13443	1.10345
Q13555-11	CAMK2G	Homo sapiens	Isoform 11 of Calcium/calmodulin-dependent protein kinase type II subunit gamma	0.216667	0.216667	0	1.03973	7.38901e-08	Stabilized	58	1	0.987552	0.904374	1.22932	1.25027
Q13555-11	CAMK2G	Homo sapiens	Isoform 11 of Calcium/calmodulin-dependent protein kinase type II subunit gamma	0.216667	0.216667	0	1.03973	7.38901e-08	Stabilized	60	1	0.908469	0.850589	1.3481	1.38364
Q13555-11	CAMK2G	Homo sapiens	Isoform 11 of Calcium/calmodulin-dependent protein kinase type II subunit gamma	0.216667	0.216667	0	1.03973	7.38901e-08	Stabilized	62	1	1.10726	0.952888	1.32863	1.4386
Q13555-11	CAMK2G	Homo sapiens	Isoform 11 of Calcium/calmodulin-dependent protein kinase type II subunit gamma	0.216667	0.216667	0	1.03973	7.38901e-08	Stabilized	64	1	1.16469	1.0405	2.08168	2.12678
Q96EM0	L3HYPDH	Homo sapiens	Trans-3-hydroxy-L-proline dehydratase	0.216667	0.216667	0	1.03953	7.38901e-08	Stabilized	42	1	1.00824	0.925962	0.972811	0.936947
Q96EM0	L3HYPDH	Homo sapiens	Trans-3-hydroxy-L-proline dehydratase	0.216667	0.216667	0	1.03953	7.38901e-08	Stabilized	44	1	0.949457	0.963214	1.00771	1.07766
Q96EM0	L3HYPDH	Homo sapiens	Trans-3-hydroxy-L-proline dehydratase	0.216667	0.216667	0	1.03953	7.38901e-08	Stabilized	46	1	0.939977	0.975157	1.03467	0.990532
Q96EM0	L3HYPDH	Homo sapiens	Trans-3-hydroxy-L-proline dehydratase	0.216667	0.216667	0	1.03953	7.38901e-08	Stabilized	48	1	0.980372	0.958309	1.09049	1.03179
Q96EM0	L3HYPDH	Homo sapiens	Trans-3-hydroxy-L-proline dehydratase	0.216667	0.216667	0	1.03953	7.38901e-08	Stabilized	50	1	1.03425	0.994954	1.0971	1.07313
Q96EM0	L3HYPDH	Homo sapiens	Trans-3-hydroxy-L-proline dehydratase	0.216667	0.216667	0	1.03953	7.38901e-08	Stabilized	52	1	1.0138	1.01406	1.05164	1.08649
Q96EM0	L3HYPDH	Homo sapiens	Trans-3-hydroxy-L-proline dehydratase	0.216667	0.216667	0	1.03953	7.38901e-08	Stabilized	54	1	0.979882	0.997031	1.0337	1.02235
Q96EM0	L3HYPDH	Homo sapiens	Trans-3-hydroxy-L-proline dehydratase	0.216667	0.216667	0	1.03953	7.38901e-08	Stabilized	56	1	0.998661	0.946678	1.04269	1.0905
Q96EM0	L3HYPDH	Homo sapiens	Trans-3-hydroxy-L-proline dehydratase	0.216667	0.216667	0	1.03953	7.38901e-08	Stabilized	58	1	1.00046	1.00336	0.968405	1.00129
Q96EM0	L3HYPDH	Homo sapiens	Trans-3-hydroxy-L-proline dehydratase	0.216667	0.216667	0	1.03953	7.38901e-08	Stabilized	60	1	1.03165	1.01101	1.15091	1.20695
Q96EM0	L3HYPDH	Homo sapiens	Trans-3-hydroxy-L-proline dehydratase	0.216667	0.216667	0	1.03953	7.38901e-08	Stabilized	62	1	1.02573	1.10985	1.42801	1.6592
Q96EM0	L3HYPDH	Homo sapiens	Trans-3-hydroxy-L-proline dehydratase	0.216667	0.216667	0	1.03953	7.38901e-08	Stabilized	64	1	0.982711	1.03368	1.1406	1.29772
Q96F10	SAT2	Homo sapiens	Diamine acetyltransferase 2	0.216667	0.216667	0	1.02561	7.38901e-08	Stabilized	42	NaN	NaN	NaN	NaN	NaN
Q96F10	SAT2	Homo sapiens	Diamine acetyltransferase 2	0.216667	0.216667	0	1.02561	7.38901e-08	Stabilized	44	NaN	NaN	NaN	NaN	NaN
Q96F10	SAT2	Homo sapiens	Diamine acetyltransferase 2	0.216667	0.216667	0	1.02561	7.38901e-08	Stabilized	46	1	0.96104	0.885383	0.919095	0.982759
Q96F10	SAT2	Homo sapiens	Diamine acetyltransferase 2	0.216667	0.216667	0	1.02561	7.38901e-08	Stabilized	48	1	0.74532	1.01316	0.889296	0.906007
Q96F10	SAT2	Homo sapiens	Diamine acetyltransferase 2	0.216667	0.216667	0	1.02561	7.38901e-08	Stabilized	50	1	0.954347	1.18782	0.930763	0.930615
Q96F10	SAT2	Homo sapiens	Diamine acetyltransferase 2	0.216667	0.216667	0	1.02561	7.38901e-08	Stabilized	52	1	1.0131	1.15666	1.1317	0.979489
Q96F10	SAT2	Homo sapiens	Diamine acetyltransferase 2	0.216667	0.216667	0	1.02561	7.38901e-08	Stabilized	54	1	1.19299	1.02355	1.232	1.11286
Q96F10	SAT2	Homo sapiens	Diamine acetyltransferase 2	0.216667	0.216667	0	1.02561	7.38901e-08	Stabilized	56	1	1.1532	1.23175	1.63949	1.16272
Q96F10	SAT2	Homo sapiens	Diamine acetyltransferase 2	0.216667	0.216667	0	1.02561	7.38901e-08	Stabilized	58	1	1.0247	0.662471	1.16013	1.12765
Q96F10	SAT2	Homo sapiens	Diamine acetyltransferase 2	0.216667	0.216667	0	1.02561	7.38901e-08	Stabilized	60	1	1.07603	0.862984	1.16822	1.11938
Q96F10	SAT2	Homo sapiens	Diamine acetyltransferase 2	0.216667	0.216667	0	1.02561	7.38901e-08	Stabilized	62	NaN	NaN	NaN	NaN	NaN
Q96F10	SAT2	Homo sapiens	Diamine acetyltransferase 2	0.216667	0.216667	0	1.02561	7.38901e-08	Stabilized	64	NaN	NaN	NaN	NaN	NaN
P16455	MGMT	Homo sapiens	Methylated-DNA--protein-cysteine methyltransferase	0.216667	0.266667	0.05	1.02402	7.38901e-08	Stabilized	42	1	1.0778	1.0115	1.10844	1.18633
P16455	MGMT	Homo sapiens	Methylated-DNA--protein-cysteine methyltransferase	0.216667	0.266667	0.05	1.02402	7.38901e-08	Stabilized	44	1	0.917389	0.963022	0.965786	0.98151
P16455	MGMT	Homo sapiens	Methylated-DNA--protein-cysteine methyltransferase	0.216667	0.266667	0.05	1.02402	7.38901e-08	Stabilized	46	1	1.02064	1.07534	0.96103	0.965172
P16455	MGMT	Homo sapiens	Methylated-DNA--protein-cysteine methyltransferase	0.216667	0.266667	0.05	1.02402	7.38901e-08	Stabilized	48	1	1.00988	1.0441	1.00055	1.02833
P16455	MGMT	Homo sapiens	Methylated-DNA--protein-cysteine methyltransferase	0.216667	0.266667	0.05	1.02402	7.38901e-08	Stabilized	50	1	0.969506	1.0659	0.885353	0.884619
P16455	MGMT	Homo sapiens	Methylated-DNA--protein-cysteine methyltransferase	0.216667	0.266667	0.05	1.02402	7.38901e-08	Stabilized	52	1	0.89896	0.874328	0.92685	1.15395
P16455	MGMT	Homo sapiens	Methylated-DNA--protein-cysteine methyltransferase	0.216667	0.266667	0.05	1.02402	7.38901e-08	Stabilized	54	1	0.995465	1.03836	1.01712	0.96784
P16455	MGMT	Homo sapiens	Methylated-DNA--protein-cysteine methyltransferase	0.216667	0.266667	0.05	1.02402	7.38901e-08	Stabilized	56	1	1.01527	0.837528	0.880422	0.95741
P16455	MGMT	Homo sapiens	Methylated-DNA--protein-cysteine methyltransferase	0.216667	0.266667	0.05	1.02402	7.38901e-08	Stabilized	58	1	1.03902	0.943659	1.21536	1.25012
P16455	MGMT	Homo sapiens	Methylated-DNA--protein-cysteine methyltransferase	0.216667	0.266667	0.05	1.02402	7.38901e-08	Stabilized	60	1	1.05816	1.38418	1.49209	1.72196
P16455	MGMT	Homo sapiens	Methylated-DNA--protein-cysteine methyltransferase	0.216667	0.266667	0.05	1.02402	7.38901e-08	Stabilized	62	1	1.10477	1.23883	1.47084	1.21766
P16455	MGMT	Homo sapiens	Methylated-DNA--protein-cysteine methyltransferase	0.216667	0.266667	0.05	1.02402	7.38901e-08	Stabilized	64	1	0.591438	0.792855	0.640872	0.593522
O43447	PPIH	Homo sapiens	Peptidyl-prolyl cis-trans isomerase H	0.216667	0.216667	0	1.01495	7.38901e-08	Stabilized	42	1	0.800274	0.896928	0.787511	0.83418
O43447	PPIH	Homo sapiens	Peptidyl-prolyl cis-trans isomerase H	0.216667	0.216667	0	1.01495	7.38901e-08	Stabilized	44	1	0.909826	0.903513	0.883564	0.977134
O43447	PPIH	Homo sapiens	Peptidyl-prolyl cis-trans isomerase H	0.216667	0.216667	0	1.01495	7.38901e-08	Stabilized	46	1	0.986926	0.950989	1.00054	1.04147
O43447	PPIH	Homo sapiens	Peptidyl-prolyl cis-trans isomerase H	0.216667	0.216667	0	1.01495	7.38901e-08	Stabilized	48	1	1.00064	0.986628	0.978912	0.979511
O43447	PPIH	Homo sapiens	Peptidyl-prolyl cis-trans isomerase H	0.216667	0.216667	0	1.01495	7.38901e-08	Stabilized	50	1	1.05298	1.0347	1.01101	1.14374
O43447	PPIH	Homo sapiens	Peptidyl-prolyl cis-trans isomerase H	0.216667	0.216667	0	1.01495	7.38901e-08	Stabilized	52	1	0.94755	0.855333	0.898833	0.94325
O43447	PPIH	Homo sapiens	Peptidyl-prolyl cis-trans isomerase H	0.216667	0.216667	0	1.01495	7.38901e-08	Stabilized	54	1	0.990618	0.808835	0.972905	1.09872
O43447	PPIH	Homo sapiens	Peptidyl-prolyl cis-trans isomerase H	0.216667	0.216667	0	1.01495	7.38901e-08	Stabilized	56	1	0.921517	0.858241	1.07227	1.09437
O43447	PPIH	Homo sapiens	Peptidyl-prolyl cis-trans isomerase H	0.216667	0.216667	0	1.01495	7.38901e-08	Stabilized	58	1	0.926999	0.872506	1.02498	1.15188
O43447	PPIH	Homo sapiens	Peptidyl-prolyl cis-trans isomerase H	0.216667	0.216667	0	1.01495	7.38901e-08	Stabilized	60	1	0.909293	0.926439	1.14831	1.16773
O43447	PPIH	Homo sapiens	Peptidyl-prolyl cis-trans isomerase H	0.216667	0.216667	0	1.01495	7.38901e-08	Stabilized	62	1	0.864042	0.83845	1.44323	1.45815
O43447	PPIH	Homo sapiens	Peptidyl-prolyl cis-trans isomerase H	0.216667	0.216667	0	1.01495	7.38901e-08	Stabilized	64	1	1.02859	1.08607	1.67405	1.7527
P49755	TMED10	Homo sapiens	Transmembrane emp24 domain-containing protein 10	0.2	0.2	0	1.31973	6.77736e-07	Stabilized	42	1	0.990187	0.932611	0.995249	0.875914
P49755	TMED10	Homo sapiens	Transmembrane emp24 domain-containing protein 10	0.2	0.2	0	1.31973	6.77736e-07	Stabilized	44	1	0.967283	1.01984	0.984249	1.02244
P49755	TMED10	Homo sapiens	Transmembrane emp24 domain-containing protein 10	0.2	0.2	0	1.31973	6.77736e-07	Stabilized	46	1	1.03847	1.04822	1.01744	0.979374
P49755	TMED10	Homo sapiens	Transmembrane emp24 domain-containing protein 10	0.2	0.2	0	1.31973	6.77736e-07	Stabilized	48	1	7.46694	1.86965	2.73804	4.57453
P49755	TMED10	Homo sapiens	Transmembrane emp24 domain-containing protein 10	0.2	0.2	0	1.31973	6.77736e-07	Stabilized	50	1	1.25433	1.87608	1.8827	1.85711
P49755	TMED10	Homo sapiens	Transmembrane emp24 domain-containing protein 10	0.2	0.2	0	1.31973	6.77736e-07	Stabilized	52	1	1.17874	1.7276	1.76428	1.64254
P49755	TMED10	Homo sapiens	Transmembrane emp24 domain-containing protein 10	0.2	0.2	0	1.31973	6.77736e-07	Stabilized	54	1	0.98377	1.09473	0.94288	0.977433
P49755	TMED10	Homo sapiens	Transmembrane emp24 domain-containing protein 10	0.2	0.2	0	1.31973	6.77736e-07	Stabilized	56	1	0.951435	1.08338	1.00861	1.05354
P49755	TMED10	Homo sapiens	Transmembrane emp24 domain-containing protein 10	0.2	0.2	0	1.31973	6.77736e-07	Stabilized	58	1	1.02108	1.12751	0.998495	1.07683
P49755	TMED10	Homo sapiens	Transmembrane emp24 domain-containing protein 10	0.2	0.2	0	1.31973	6.77736e-07	Stabilized	60	1	0.959779	1.09371	0.966209	1.09671
P49755	TMED10	Homo sapiens	Transmembrane emp24 domain-containing protein 10	0.2	0.2	0	1.31973	6.77736e-07	Stabilized	62	1	1.03326	1.05345	1.17761	1.2598
P49755	TMED10	Homo sapiens	Transmembrane emp24 domain-containing protein 10	0.2	0.2	0	1.31973	6.77736e-07	Stabilized	64	1	1.04306	1.2469	1.13675	1.0933
P09211	GSTP1	Homo sapiens	Glutathione S-transferase P	0.2	0.2	0	1.23818	6.77736e-07	Solubility/Expression	42	1	1.89702	0.901029	1.03712	1.4801
P09211	GSTP1	Homo sapiens	Glutathione S-transferase P	0.2	0.2	0	1.23818	6.77736e-07	Solubility/Expression	44	1	2.40849	0.899004	0.934599	1.871
P09211	GSTP1	Homo sapiens	Glutathione S-transferase P	0.2	0.2	0	1.23818	6.77736e-07	Solubility/Expression	46	1	1.69926	1.72067	1.04843	1.69226
P09211	GSTP1	Homo sapiens	Glutathione S-transferase P	0.2	0.2	0	1.23818	6.77736e-07	Solubility/Expression	48	1	1.4811	0.973091	1.02594	1.23053
P09211	GSTP1	Homo sapiens	Glutathione S-transferase P	0.2	0.2	0	1.23818	6.77736e-07	Solubility/Expression	50	1	1.04035	1.18311	1.24764	1.27337
P09211	GSTP1	Homo sapiens	Glutathione S-transferase P	0.2	0.2	0	1.23818	6.77736e-07	Solubility/Expression	52	1	1.09233	1.07145	1.13494	1.17008
P09211	GSTP1	Homo sapiens	Glutathione S-transferase P	0.2	0.2	0	1.23818	6.77736e-07	Solubility/Expression	54	1	0.96682	1.00193	0.959881	1.03424
P09211	GSTP1	Homo sapiens	Glutathione S-transferase P	0.2	0.2	0	1.23818	6.77736e-07	Solubility/Expression	56	1	0.99315	1.04619	1.05324	1.0984
P09211	GSTP1	Homo sapiens	Glutathione S-transferase P	0.2	0.2	0	1.23818	6.77736e-07	Solubility/Expression	58	1	1.23853	0.967748	1.30565	1.58737
P09211	GSTP1	Homo sapiens	Glutathione S-transferase P	0.2	0.2	0	1.23818	6.77736e-07	Solubility/Expression	60	1	0.841806	0.829041	1.6083	1.71734
P09211	GSTP1	Homo sapiens	Glutathione S-transferase P	0.2	0.2	0	1.23818	6.77736e-07	Solubility/Expression	62	1	1.21203	0.956794	1.83713	1.89515
P09211	GSTP1	Homo sapiens	Glutathione S-transferase P	0.2	0.2	0	1.23818	6.77736e-07	Solubility/Expression	64	1	1.15626	1.01832	2.15317	2.29926
O00299	CLIC1	Homo sapiens	Chloride intracellular channel protein 1	0.2	0.2	0	1.20378	6.77736e-07	Solubility/Expression	42	1	1.9398	1.04391	1.14296	1.62479
O00299	CLIC1	Homo sapiens	Chloride intracellular channel protein 1	0.2	0.2	0	1.20378	6.77736e-07	Solubility/Expression	44	1	1.59563	0.991797	1.00329	1.32224
O00299	CLIC1	Homo sapiens	Chloride intracellular channel protein 1	0.2	0.2	0	1.20378	6.77736e-07	Solubility/Expression	46	1	1.53003	1.01494	1.27694	1.44948
O00299	CLIC1	Homo sapiens	Chloride intracellular channel protein 1	0.2	0.2	0	1.20378	6.77736e-07	Solubility/Expression	48	1	1.25417	0.985949	1.30007	1.34921
O00299	CLIC1	Homo sapiens	Chloride intracellular channel protein 1	0.2	0.2	0	1.20378	6.77736e-07	Solubility/Expression	50	1	1.0465	1.05409	1.07057	1.20014
O00299	CLIC1	Homo sapiens	Chloride intracellular channel protein 1	0.2	0.2	0	1.20378	6.77736e-07	Solubility/Expression	52	1	1.07157	1.03231	1.052	1.0429
O00299	CLIC1	Homo sapiens	Chloride intracellular channel protein 1	0.2	0.2	0	1.20378	6.77736e-07	Solubility/Expression	54	1	1.01975	0.874319	0.938106	0.988959
O00299	CLIC1	Homo sapiens	Chloride intracellular channel protein 1	0.2	0.2	0	1.20378	6.77736e-07	Solubility/Expression	56	1	0.928802	1.0105	1.20449	1.30772
O00299	CLIC1	Homo sapiens	Chloride intracellular channel protein 1	0.2	0.2	0	1.20378	6.77736e-07	Solubility/Expression	58	1	1.11562	0.885356	1.44599	1.65217
O00299	CLIC1	Homo sapiens	Chloride intracellular channel protein 1	0.2	0.2	0	1.20378	6.77736e-07	Solubility/Expression	60	1	0.783588	0.856346	1.64634	1.74292
O00299	CLIC1	Homo sapiens	Chloride intracellular channel protein 1	0.2	0.2	0	1.20378	6.77736e-07	Solubility/Expression	62	1	1.20389	0.893618	1.91043	2.07432
O00299	CLIC1	Homo sapiens	Chloride intracellular channel protein 1	0.2	0.2	0	1.20378	6.77736e-07	Solubility/Expression	64	1	1.05764	0.954394	2.09087	2.24557
P63241-2	EIF5A	Homo sapiens	Isoform 2 of Eukaryotic translation initiation factor 5A-1	0.2	0.2	0	1.18565	6.77736e-07	Stabilized	42	1	1.49081	1.09665	1.09818	1.37566
P63241-2	EIF5A	Homo sapiens	Isoform 2 of Eukaryotic translation initiation factor 5A-1	0.2	0.2	0	1.18565	6.77736e-07	Stabilized	44	1	2.29395	0.737208	0.971721	2.01791
P63241-2	EIF5A	Homo sapiens	Isoform 2 of Eukaryotic translation initiation factor 5A-1	0.2	0.2	0	1.18565	6.77736e-07	Stabilized	46	1	3.41512	0.904232	1.01599	2.40401
P63241-2	EIF5A	Homo sapiens	Isoform 2 of Eukaryotic translation initiation factor 5A-1	0.2	0.2	0	1.18565	6.77736e-07	Stabilized	48	1	1.47464	1.06034	1.01078	1.40609
P63241-2	EIF5A	Homo sapiens	Isoform 2 of Eukaryotic translation initiation factor 5A-1	0.2	0.2	0	1.18565	6.77736e-07	Stabilized	50	1	1.0407	0.980127	0.975975	1.58434
P63241-2	EIF5A	Homo sapiens	Isoform 2 of Eukaryotic translation initiation factor 5A-1	0.2	0.2	0	1.18565	6.77736e-07	Stabilized	52	1	0.927014	0.836094	0.936471	0.926675
P63241-2	EIF5A	Homo sapiens	Isoform 2 of Eukaryotic translation initiation factor 5A-1	0.2	0.2	0	1.18565	6.77736e-07	Stabilized	54	1	1.0026	1.00774	1.0281	1.0571
P63241-2	EIF5A	Homo sapiens	Isoform 2 of Eukaryotic translation initiation factor 5A-1	0.2	0.2	0	1.18565	6.77736e-07	Stabilized	56	1	0.970244	0.91266	0.968606	0.993642
P63241-2	EIF5A	Homo sapiens	Isoform 2 of Eukaryotic translation initiation factor 5A-1	0.2	0.2	0	1.18565	6.77736e-07	Stabilized	58	1	1.07752	1.06317	1.26304	1.31765
P63241-2	EIF5A	Homo sapiens	Isoform 2 of Eukaryotic translation initiation factor 5A-1	0.2	0.2	0	1.18565	6.77736e-07	Stabilized	60	1	0.951185	1.05911	1.17987	1.18602
P63241-2	EIF5A	Homo sapiens	Isoform 2 of Eukaryotic translation initiation factor 5A-1	0.2	0.2	0	1.18565	6.77736e-07	Stabilized	62	1	1.04394	0.966637	1.5363	1.67463
P63241-2	EIF5A	Homo sapiens	Isoform 2 of Eukaryotic translation initiation factor 5A-1	0.2	0.2	0	1.18565	6.77736e-07	Stabilized	64	1	1.01027	1.05972	1.38654	1.44192
Q9NTG7	SIRT3	Homo sapiens	NAD-dependent protein deacetylase sirtuin-3, mitochondrial	0.2	0.216667	0.0166667	1.17859	6.77736e-07	Stabilized	42	1	1.02979	0.986799	0.965201	0.940749
Q9NTG7	SIRT3	Homo sapiens	NAD-dependent protein deacetylase sirtuin-3, mitochondrial	0.2	0.216667	0.0166667	1.17859	6.77736e-07	Stabilized	44	1	1.02244	1.15677	1.16682	1.07578
Q9NTG7	SIRT3	Homo sapiens	NAD-dependent protein deacetylase sirtuin-3, mitochondrial	0.2	0.216667	0.0166667	1.17859	6.77736e-07	Stabilized	46	1	0.866969	1.01952	0.982692	1.01949
Q9NTG7	SIRT3	Homo sapiens	NAD-dependent protein deacetylase sirtuin-3, mitochondrial	0.2	0.216667	0.0166667	1.17859	6.77736e-07	Stabilized	48	1	1.05477	1.18334	1.19709	1.16527
Q9NTG7	SIRT3	Homo sapiens	NAD-dependent protein deacetylase sirtuin-3, mitochondrial	0.2	0.216667	0.0166667	1.17859	6.77736e-07	Stabilized	50	1	0.854397	1.25556	1.21822	1.22343
Q9NTG7	SIRT3	Homo sapiens	NAD-dependent protein deacetylase sirtuin-3, mitochondrial	0.2	0.216667	0.0166667	1.17859	6.77736e-07	Stabilized	52	1	0.903334	0.993777	0.843006	0.907567
Q9NTG7	SIRT3	Homo sapiens	NAD-dependent protein deacetylase sirtuin-3, mitochondrial	0.2	0.216667	0.0166667	1.17859	6.77736e-07	Stabilized	54	1	0.904414	0.782161	0.898819	1.02209
Q9NTG7	SIRT3	Homo sapiens	NAD-dependent protein deacetylase sirtuin-3, mitochondrial	0.2	0.216667	0.0166667	1.17859	6.77736e-07	Stabilized	56	1	1.17427	1.27193	1.41274	1.26786
Q9NTG7	SIRT3	Homo sapiens	NAD-dependent protein deacetylase sirtuin-3, mitochondrial	0.2	0.216667	0.0166667	1.17859	6.77736e-07	Stabilized	58	1	1.0656	1.20938	2.05918	1.97812
Q9NTG7	SIRT3	Homo sapiens	NAD-dependent protein deacetylase sirtuin-3, mitochondrial	0.2	0.216667	0.0166667	1.17859	6.77736e-07	Stabilized	60	1	1.01705	1.26571	1.36491	1.05346
Q9NTG7	SIRT3	Homo sapiens	NAD-dependent protein deacetylase sirtuin-3, mitochondrial	0.2	0.216667	0.0166667	1.17859	6.77736e-07	Stabilized	62	1	3.41473	1.45116	2.02738	1.9703
Q9NTG7	SIRT3	Homo sapiens	NAD-dependent protein deacetylase sirtuin-3, mitochondrial	0.2	0.216667	0.0166667	1.17859	6.77736e-07	Stabilized	64	1	1.74305	0.542593	1.65062	1.13509
P04083	ANXA1	Homo sapiens	Annexin A1	0.2	0.2	0	1.163	6.77736e-07	Stabilized	42	1	1.26016	0.997895	1.08907	1.42693
P04083	ANXA1	Homo sapiens	Annexin A1	0.2	0.2	0	1.163	6.77736e-07	Stabilized	44	1	1.62087	0.986322	1.2271	1.37398
P04083	ANXA1	Homo sapiens	Annexin A1	0.2	0.2	0	1.163	6.77736e-07	Stabilized	46	1	1.98211	1.30262	1.12824	1.55211
P04083	ANXA1	Homo sapiens	Annexin A1	0.2	0.2	0	1.163	6.77736e-07	Stabilized	48	1	1.8862	1.12107	1.12008	1.48132
P04083	ANXA1	Homo sapiens	Annexin A1	0.2	0.2	0	1.163	6.77736e-07	Stabilized	50	1	1.30725	0.963485	0.952786	1.25225
P04083	ANXA1	Homo sapiens	Annexin A1	0.2	0.2	0	1.163	6.77736e-07	Stabilized	52	1	0.800044	0.650167	0.770436	0.691573
P04083	ANXA1	Homo sapiens	Annexin A1	0.2	0.2	0	1.163	6.77736e-07	Stabilized	54	1	0.961283	0.899442	1.18184	1.28375
P04083	ANXA1	Homo sapiens	Annexin A1	0.2	0.2	0	1.163	6.77736e-07	Stabilized	56	1	0.826789	0.699256	0.788267	0.713655
P04083	ANXA1	Homo sapiens	Annexin A1	0.2	0.2	0	1.163	6.77736e-07	Stabilized	58	1	0.971403	0.893614	1.44973	1.60683
P04083	ANXA1	Homo sapiens	Annexin A1	0.2	0.2	0	1.163	6.77736e-07	Stabilized	60	1	0.869549	0.832967	1.63182	1.79214
P04083	ANXA1	Homo sapiens	Annexin A1	0.2	0.2	0	1.163	6.77736e-07	Stabilized	62	1	1.10298	1.00867	1.87991	2.10318
P04083	ANXA1	Homo sapiens	Annexin A1	0.2	0.2	0	1.163	6.77736e-07	Stabilized	64	1	0.956168	0.962376	1.64844	1.77189
P30041	PRDX6	Homo sapiens	Peroxiredoxin-6	0.2	0.2	0	1.16125	6.77736e-07	Stabilized	42	1	1.49224	0.999195	1.2821	1.44758
P30041	PRDX6	Homo sapiens	Peroxiredoxin-6	0.2	0.2	0	1.16125	6.77736e-07	Stabilized	44	1	1.18034	0.963156	0.977656	1.13576
P30041	PRDX6	Homo sapiens	Peroxiredoxin-6	0.2	0.2	0	1.16125	6.77736e-07	Stabilized	46	1	1.60182	1.10386	1.21023	1.30152
P30041	PRDX6	Homo sapiens	Peroxiredoxin-6	0.2	0.2	0	1.16125	6.77736e-07	Stabilized	48	1	1.78387	1.14354	1.18564	1.40002
P30041	PRDX6	Homo sapiens	Peroxiredoxin-6	0.2	0.2	0	1.16125	6.77736e-07	Stabilized	50	1	1.23658	1.33391	1.31703	1.37991
P30041	PRDX6	Homo sapiens	Peroxiredoxin-6	0.2	0.2	0	1.16125	6.77736e-07	Stabilized	52	1	1.05522	1.11879	1.0528	1.28985
P30041	PRDX6	Homo sapiens	Peroxiredoxin-6	0.2	0.2	0	1.16125	6.77736e-07	Stabilized	54	1	0.987178	1.06001	0.883842	0.965796
P30041	PRDX6	Homo sapiens	Peroxiredoxin-6	0.2	0.2	0	1.16125	6.77736e-07	Stabilized	56	1	1.05809	1.11156	0.943764	1.01901
P30041	PRDX6	Homo sapiens	Peroxiredoxin-6	0.2	0.2	0	1.16125	6.77736e-07	Stabilized	58	1	1.15952	1.07003	1.06086	1.23506
P30041	PRDX6	Homo sapiens	Peroxiredoxin-6	0.2	0.2	0	1.16125	6.77736e-07	Stabilized	60	1	0.917938	0.972962	1.18027	1.25248
P30041	PRDX6	Homo sapiens	Peroxiredoxin-6	0.2	0.2	0	1.16125	6.77736e-07	Stabilized	62	1	1.21153	0.944404	1.5605	1.72439
P30041	PRDX6	Homo sapiens	Peroxiredoxin-6	0.2	0.2	0	1.16125	6.77736e-07	Stabilized	64	1	1.06246	0.941108	1.61775	1.74195
E9PR17		Homo sapiens	CD59 glycoprotein	0.2	0.2	0	1.16105	6.77736e-07	Solubility/Expression	42	1	1.44872	1.46246	1.56371	1.86693
E9PR17		Homo sapiens	CD59 glycoprotein	0.2	0.2	0	1.16105	6.77736e-07	Solubility/Expression	44	1	1.25721	1.18923	1.3737	1.42762
E9PR17		Homo sapiens	CD59 glycoprotein	0.2	0.2	0	1.16105	6.77736e-07	Solubility/Expression	46	1	1.10682	1.16834	1.21441	1.4013
E9PR17		Homo sapiens	CD59 glycoprotein	0.2	0.2	0	1.16105	6.77736e-07	Solubility/Expression	48	1	1.1632	1.32767	1.39179	1.46708
E9PR17		Homo sapiens	CD59 glycoprotein	0.2	0.2	0	1.16105	6.77736e-07	Solubility/Expression	50	1	1.03649	1.21368	1.24978	1.22462
E9PR17		Homo sapiens	CD59 glycoprotein	0.2	0.2	0	1.16105	6.77736e-07	Solubility/Expression	52	1	1.1086	1.39618	1.623	1.475
E9PR17		Homo sapiens	CD59 glycoprotein	0.2	0.2	0	1.16105	6.77736e-07	Solubility/Expression	54	1	0.718925	1.01107	1.00087	0.881387
E9PR17		Homo sapiens	CD59 glycoprotein	0.2	0.2	0	1.16105	6.77736e-07	Solubility/Expression	56	1	0.912745	1.05919	1.06628	1.01557
E9PR17		Homo sapiens	CD59 glycoprotein	0.2	0.2	0	1.16105	6.77736e-07	Solubility/Expression	58	1	0.896442	1.24333	1.00503	0.99415
E9PR17		Homo sapiens	CD59 glycoprotein	0.2	0.2	0	1.16105	6.77736e-07	Solubility/Expression	60	1	1.46978	1.43456	1.18718	1.2438
E9PR17		Homo sapiens	CD59 glycoprotein	0.2	0.2	0	1.16105	6.77736e-07	Solubility/Expression	62	1	1.39359	1.3108	0.870136	1.13827
E9PR17		Homo sapiens	CD59 glycoprotein	0.2	0.2	0	1.16105	6.77736e-07	Solubility/Expression	64	1	0.928158	1.17212	0.77597	0.776041
A0A087WYT3	PTGES3	Homo sapiens	Prostaglandin E synthase 3	0.2	0.2	0	1.14811	6.77736e-07	Stabilized	42	1	1.57876	0.894713	1.545	1.45604
A0A087WYT3	PTGES3	Homo sapiens	Prostaglandin E synthase 3	0.2	0.2	0	1.14811	6.77736e-07	Stabilized	44	1	1.74286	1.01154	1.08625	1.42649
A0A087WYT3	PTGES3	Homo sapiens	Prostaglandin E synthase 3	0.2	0.2	0	1.14811	6.77736e-07	Stabilized	46	1	2.217	1.01688	1.54493	1.72309
A0A087WYT3	PTGES3	Homo sapiens	Prostaglandin E synthase 3	0.2	0.2	0	1.14811	6.77736e-07	Stabilized	48	1	1.4178	0.922194	1.52146	1.32132
A0A087WYT3	PTGES3	Homo sapiens	Prostaglandin E synthase 3	0.2	0.2	0	1.14811	6.77736e-07	Stabilized	50	1	1.03267	0.947909	0.929017	0.891453
A0A087WYT3	PTGES3	Homo sapiens	Prostaglandin E synthase 3	0.2	0.2	0	1.14811	6.77736e-07	Stabilized	52	1	0.872676	0.774991	0.79528	0.718625
A0A087WYT3	PTGES3	Homo sapiens	Prostaglandin E synthase 3	0.2	0.2	0	1.14811	6.77736e-07	Stabilized	54	1	0.997923	0.923116	1.01931	1.01614
A0A087WYT3	PTGES3	Homo sapiens	Prostaglandin E synthase 3	0.2	0.2	0	1.14811	6.77736e-07	Stabilized	56	1	0.866147	0.787977	0.864998	0.829769
A0A087WYT3	PTGES3	Homo sapiens	Prostaglandin E synthase 3	0.2	0.2	0	1.14811	6.77736e-07	Stabilized	58	1	1.00525	0.905885	1.49616	1.81596
A0A087WYT3	PTGES3	Homo sapiens	Prostaglandin E synthase 3	0.2	0.2	0	1.14811	6.77736e-07	Stabilized	60	1	0.842627	0.90174	1.18871	1.16097
A0A087WYT3	PTGES3	Homo sapiens	Prostaglandin E synthase 3	0.2	0.2	0	1.14811	6.77736e-07	Stabilized	62	1	1.10274	0.859147	1.49917	1.56246
A0A087WYT3	PTGES3	Homo sapiens	Prostaglandin E synthase 3	0.2	0.2	0	1.14811	6.77736e-07	Stabilized	64	1	0.928348	0.995331	1.95224	1.97566
P32119	PRDX2	Homo sapiens	Peroxiredoxin-2	0.2	0.2	0	1.13998	6.77736e-07	Solubility/Expression	42	1	1.78495	1.00871	1.39634	1.58608
P32119	PRDX2	Homo sapiens	Peroxiredoxin-2	0.2	0.2	0	1.13998	6.77736e-07	Solubility/Expression	44	1	1.83006	0.975812	1.22093	1.53941
P32119	PRDX2	Homo sapiens	Peroxiredoxin-2	0.2	0.2	0	1.13998	6.77736e-07	Solubility/Expression	46	1	1.68891	1.22833	1.13312	1.40084
P32119	PRDX2	Homo sapiens	Peroxiredoxin-2	0.2	0.2	0	1.13998	6.77736e-07	Solubility/Expression	48	1	1.30902	0.952412	0.948622	1.21351
P32119	PRDX2	Homo sapiens	Peroxiredoxin-2	0.2	0.2	0	1.13998	6.77736e-07	Solubility/Expression	50	1	1.03546	1.25988	1.33703	1.29155
P32119	PRDX2	Homo sapiens	Peroxiredoxin-2	0.2	0.2	0	1.13998	6.77736e-07	Solubility/Expression	52	1	1.06314	1.05972	1.12092	1.11127
P32119	PRDX2	Homo sapiens	Peroxiredoxin-2	0.2	0.2	0	1.13998	6.77736e-07	Solubility/Expression	54	1	0.980522	1.05296	0.9112	0.942819
P32119	PRDX2	Homo sapiens	Peroxiredoxin-2	0.2	0.2	0	1.13998	6.77736e-07	Solubility/Expression	56	1	0.967112	1.10317	1.05684	1.07866
P32119	PRDX2	Homo sapiens	Peroxiredoxin-2	0.2	0.2	0	1.13998	6.77736e-07	Solubility/Expression	58	1	1.12069	1.15151	1.05035	1.11068
P32119	PRDX2	Homo sapiens	Peroxiredoxin-2	0.2	0.2	0	1.13998	6.77736e-07	Solubility/Expression	60	1	0.918583	1.00595	1.07419	1.13487
P32119	PRDX2	Homo sapiens	Peroxiredoxin-2	0.2	0.2	0	1.13998	6.77736e-07	Solubility/Expression	62	1	1.10007	1.01122	1.18118	1.28382
P32119	PRDX2	Homo sapiens	Peroxiredoxin-2	0.2	0.2	0	1.13998	6.77736e-07	Solubility/Expression	64	1	1.10844	1.19739	1.15815	1.20259
G8JLB6	HNRNPH1	Homo sapiens	Heterogeneous nuclear ribonucleoprotein H	0.2	0.2	0	1.13881	6.77736e-07	Solubility/Expression	42	1	1.8137	1.19482	1.15836	1.60301
G8JLB6	HNRNPH1	Homo sapiens	Heterogeneous nuclear ribonucleoprotein H	0.2	0.2	0	1.13881	6.77736e-07	Solubility/Expression	44	1	1.73821	1.10629	1.29917	1.5361
G8JLB6	HNRNPH1	Homo sapiens	Heterogeneous nuclear ribonucleoprotein H	0.2	0.2	0	1.13881	6.77736e-07	Solubility/Expression	46	1	1.2747	0.951606	1.39615	1.39831
G8JLB6	HNRNPH1	Homo sapiens	Heterogeneous nuclear ribonucleoprotein H	0.2	0.2	0	1.13881	6.77736e-07	Solubility/Expression	48	1	1.04886	1.2685	1.12981	1.30112
G8JLB6	HNRNPH1	Homo sapiens	Heterogeneous nuclear ribonucleoprotein H	0.2	0.2	0	1.13881	6.77736e-07	Solubility/Expression	50	1	1.00817	1.02527	0.933046	1.02709
G8JLB6	HNRNPH1	Homo sapiens	Heterogeneous nuclear ribonucleoprotein H	0.2	0.2	0	1.13881	6.77736e-07	Solubility/Expression	52	1	0.966325	0.8202	0.904288	0.798791
G8JLB6	HNRNPH1	Homo sapiens	Heterogeneous nuclear ribonucleoprotein H	0.2	0.2	0	1.13881	6.77736e-07	Solubility/Expression	54	1	0.863273	0.903764	0.957554	1.0963
G8JLB6	HNRNPH1	Homo sapiens	Heterogeneous nuclear ribonucleoprotein H	0.2	0.2	0	1.13881	6.77736e-07	Solubility/Expression	56	1	0.969327	0.853644	0.892727	0.974167
G8JLB6	HNRNPH1	Homo sapiens	Heterogeneous nuclear ribonucleoprotein H	0.2	0.2	0	1.13881	6.77736e-07	Solubility/Expression	58	1	1.09813	0.897882	1.25943	1.39707
G8JLB6	HNRNPH1	Homo sapiens	Heterogeneous nuclear ribonucleoprotein H	0.2	0.2	0	1.13881	6.77736e-07	Solubility/Expression	60	1	0.945644	0.941532	1.06139	1.23761
G8JLB6	HNRNPH1	Homo sapiens	Heterogeneous nuclear ribonucleoprotein H	0.2	0.2	0	1.13881	6.77736e-07	Solubility/Expression	62	1	1.06428	1.0455	1.63639	2.10096
G8JLB6	HNRNPH1	Homo sapiens	Heterogeneous nuclear ribonucleoprotein H	0.2	0.2	0	1.13881	6.77736e-07	Solubility/Expression	64	1	1.11623	0.914756	1.52252	1.87645
Q14376	GALE	Homo sapiens	UDP-glucose 4-epimerase	0.2	0.2	0	1.12807	6.77736e-07	Stabilized	42	1	1.31553	1.21953	1.32751	1.34022
Q14376	GALE	Homo sapiens	UDP-glucose 4-epimerase	0.2	0.2	0	1.12807	6.77736e-07	Stabilized	44	1	1.39647	1.1772	1.22878	1.18413
Q14376	GALE	Homo sapiens	UDP-glucose 4-epimerase	0.2	0.2	0	1.12807	6.77736e-07	Stabilized	46	1	1.20814	1.21824	1.24214	1.1679
Q14376	GALE	Homo sapiens	UDP-glucose 4-epimerase	0.2	0.2	0	1.12807	6.77736e-07	Stabilized	48	1	1.01227	1.03225	0.954262	0.931617
Q14376	GALE	Homo sapiens	UDP-glucose 4-epimerase	0.2	0.2	0	1.12807	6.77736e-07	Stabilized	50	1	1.08531	1.04778	1.05593	1.17307
Q14376	GALE	Homo sapiens	UDP-glucose 4-epimerase	0.2	0.2	0	1.12807	6.77736e-07	Stabilized	52	1	1.02569	0.93564	1.01546	1.00436
Q14376	GALE	Homo sapiens	UDP-glucose 4-epimerase	0.2	0.2	0	1.12807	6.77736e-07	Stabilized	54	1	0.981178	0.945955	0.864299	1.06902
Q14376	GALE	Homo sapiens	UDP-glucose 4-epimerase	0.2	0.2	0	1.12807	6.77736e-07	Stabilized	56	1	1.02581	0.92055	1.02204	1.08626
Q14376	GALE	Homo sapiens	UDP-glucose 4-epimerase	0.2	0.2	0	1.12807	6.77736e-07	Stabilized	58	1	1.12298	0.860417	1.19201	1.25691
Q14376	GALE	Homo sapiens	UDP-glucose 4-epimerase	0.2	0.2	0	1.12807	6.77736e-07	Stabilized	60	1	0.899617	0.855716	1.31348	1.29895
Q14376	GALE	Homo sapiens	UDP-glucose 4-epimerase	0.2	0.2	0	1.12807	6.77736e-07	Stabilized	62	1	1.29148	0.912853	1.59362	1.60035
Q14376	GALE	Homo sapiens	UDP-glucose 4-epimerase	0.2	0.2	0	1.12807	6.77736e-07	Stabilized	64	1	1.06108	1.04923	2.025	2.13569
O75663	TIPRL	Homo sapiens	TIP41-like protein	0.2	0.2	0	1.12792	6.77736e-07	Stabilized	42	1	1.39347	0.937186	1.4061	1.26535
O75663	TIPRL	Homo sapiens	TIP41-like protein	0.2	0.2	0	1.12792	6.77736e-07	Stabilized	44	1	1.28983	0.875155	1.34744	1.19689
O75663	TIPRL	Homo sapiens	TIP41-like protein	0.2	0.2	0	1.12792	6.77736e-07	Stabilized	46	1	1.06836	1.0211	1.08571	1.03186
O75663	TIPRL	Homo sapiens	TIP41-like protein	0.2	0.2	0	1.12792	6.77736e-07	Stabilized	48	1	1.00406	0.998797	1.00622	0.974757
O75663	TIPRL	Homo sapiens	TIP41-like protein	0.2	0.2	0	1.12792	6.77736e-07	Stabilized	50	1	1.0563	1.04014	1.06842	1.09814
O75663	TIPRL	Homo sapiens	TIP41-like protein	0.2	0.2	0	1.12792	6.77736e-07	Stabilized	52	1	0.976991	0.917508	0.973025	0.945447
O75663	TIPRL	Homo sapiens	TIP41-like protein	0.2	0.2	0	1.12792	6.77736e-07	Stabilized	54	1	1.03844	0.894705	1.03909	1.15841
O75663	TIPRL	Homo sapiens	TIP41-like protein	0.2	0.2	0	1.12792	6.77736e-07	Stabilized	56	1	0.960822	0.962246	1.13289	1.16082
O75663	TIPRL	Homo sapiens	TIP41-like protein	0.2	0.2	0	1.12792	6.77736e-07	Stabilized	58	1	1.03899	0.915313	1.30349	1.36624
O75663	TIPRL	Homo sapiens	TIP41-like protein	0.2	0.2	0	1.12792	6.77736e-07	Stabilized	60	1	0.943462	0.976707	1.26294	1.47075
O75663	TIPRL	Homo sapiens	TIP41-like protein	0.2	0.2	0	1.12792	6.77736e-07	Stabilized	62	1	1.14063	0.890172	1.6874	1.77451
O75663	TIPRL	Homo sapiens	TIP41-like protein	0.2	0.2	0	1.12792	6.77736e-07	Stabilized	64	1	1.16674	0.991826	2.12677	2.29375
O75390	CS	Homo sapiens	Citrate synthase, mitochondrial	0.2	0.2	0	1.11967	6.77736e-07	Stabilized	42	1	1.34498	0.988555	0.989813	1.16896
O75390	CS	Homo sapiens	Citrate synthase, mitochondrial	0.2	0.2	0	1.11967	6.77736e-07	Stabilized	44	1	1.57147	1.05962	1.0473	1.40215
O75390	CS	Homo sapiens	Citrate synthase, mitochondrial	0.2	0.2	0	1.11967	6.77736e-07	Stabilized	46	1	1.40771	1.09887	1.13857	1.266
O75390	CS	Homo sapiens	Citrate synthase, mitochondrial	0.2	0.2	0	1.11967	6.77736e-07	Stabilized	48	1	1.34183	1.07046	1.27299	1.20301
O75390	CS	Homo sapiens	Citrate synthase, mitochondrial	0.2	0.2	0	1.11967	6.77736e-07	Stabilized	50	1	1.06193	1.05938	1.05122	1.09697
O75390	CS	Homo sapiens	Citrate synthase, mitochondrial	0.2	0.2	0	1.11967	6.77736e-07	Stabilized	52	1	0.989016	0.978523	1.01248	0.980725
O75390	CS	Homo sapiens	Citrate synthase, mitochondrial	0.2	0.2	0	1.11967	6.77736e-07	Stabilized	54	1	0.988996	1.01808	0.949199	1.00957
O75390	CS	Homo sapiens	Citrate synthase, mitochondrial	0.2	0.2	0	1.11967	6.77736e-07	Stabilized	56	1	0.950292	1.02448	0.966612	0.955949
O75390	CS	Homo sapiens	Citrate synthase, mitochondrial	0.2	0.2	0	1.11967	6.77736e-07	Stabilized	58	1	1.10492	1.05404	1.13699	1.19594
O75390	CS	Homo sapiens	Citrate synthase, mitochondrial	0.2	0.2	0	1.11967	6.77736e-07	Stabilized	60	1	0.910008	0.939823	1.26753	1.26248
O75390	CS	Homo sapiens	Citrate synthase, mitochondrial	0.2	0.2	0	1.11967	6.77736e-07	Stabilized	62	1	1.1265	0.907935	1.58111	1.64266
O75390	CS	Homo sapiens	Citrate synthase, mitochondrial	0.2	0.2	0	1.11967	6.77736e-07	Stabilized	64	1	1.14799	1.00391	1.66021	1.77237
A9Z1X7	SRRM1	Homo sapiens	Serine/arginine repetitive matrix protein 1	0.2	0.2	0	1.09906	6.77736e-07	Stabilized	42	1	1.18885	1.15624	1.16197	1.12702
A9Z1X7	SRRM1	Homo sapiens	Serine/arginine repetitive matrix protein 1	0.2	0.2	0	1.09906	6.77736e-07	Stabilized	44	1	1.21206	1.19611	1.35868	1.18514
A9Z1X7	SRRM1	Homo sapiens	Serine/arginine repetitive matrix protein 1	0.2	0.2	0	1.09906	6.77736e-07	Stabilized	46	1	1.07255	0.954183	1.12474	1.22642
A9Z1X7	SRRM1	Homo sapiens	Serine/arginine repetitive matrix protein 1	0.2	0.2	0	1.09906	6.77736e-07	Stabilized	48	1	0.996418	1.16027	1.24329	1.26996
A9Z1X7	SRRM1	Homo sapiens	Serine/arginine repetitive matrix protein 1	0.2	0.2	0	1.09906	6.77736e-07	Stabilized	50	1	0.927163	0.987033	1.06291	1.00635
A9Z1X7	SRRM1	Homo sapiens	Serine/arginine repetitive matrix protein 1	0.2	0.2	0	1.09906	6.77736e-07	Stabilized	52	1	0.973736	0.803116	0.976489	0.876932
A9Z1X7	SRRM1	Homo sapiens	Serine/arginine repetitive matrix protein 1	0.2	0.2	0	1.09906	6.77736e-07	Stabilized	54	1	0.798968	0.777836	1.01964	0.996415
A9Z1X7	SRRM1	Homo sapiens	Serine/arginine repetitive matrix protein 1	0.2	0.2	0	1.09906	6.77736e-07	Stabilized	56	1	0.802704	0.759258	1.00791	1.02155
A9Z1X7	SRRM1	Homo sapiens	Serine/arginine repetitive matrix protein 1	0.2	0.2	0	1.09906	6.77736e-07	Stabilized	58	1	0.776834	0.707367	1.47854	1.79335
A9Z1X7	SRRM1	Homo sapiens	Serine/arginine repetitive matrix protein 1	0.2	0.2	0	1.09906	6.77736e-07	Stabilized	60	1	0.978146	0.900292	1.16738	1.23746
A9Z1X7	SRRM1	Homo sapiens	Serine/arginine repetitive matrix protein 1	0.2	0.2	0	1.09906	6.77736e-07	Stabilized	62	1	1.09733	1.10772	1.92451	2.55289
A9Z1X7	SRRM1	Homo sapiens	Serine/arginine repetitive matrix protein 1	0.2	0.2	0	1.09906	6.77736e-07	Stabilized	64	1	1.05313	1.02923	1.22987	1.47755
Q9UBQ5	EIF3K	Homo sapiens	Eukaryotic translation initiation factor 3 subunit K	0.2	0.2	0	1.09727	6.77736e-07	Stabilized	42	1	1.07156	0.984646	1.10052	1.07042
Q9UBQ5	EIF3K	Homo sapiens	Eukaryotic translation initiation factor 3 subunit K	0.2	0.2	0	1.09727	6.77736e-07	Stabilized	44	1	1.18705	0.960363	1.25391	1.18959
Q9UBQ5	EIF3K	Homo sapiens	Eukaryotic translation initiation factor 3 subunit K	0.2	0.2	0	1.09727	6.77736e-07	Stabilized	46	1	0.951106	0.928895	1.00093	0.996451
Q9UBQ5	EIF3K	Homo sapiens	Eukaryotic translation initiation factor 3 subunit K	0.2	0.2	0	1.09727	6.77736e-07	Stabilized	48	1	0.966061	0.997882	1.04656	1.0134
Q9UBQ5	EIF3K	Homo sapiens	Eukaryotic translation initiation factor 3 subunit K	0.2	0.2	0	1.09727	6.77736e-07	Stabilized	50	1	1.02564	1.01769	0.994079	0.952951
Q9UBQ5	EIF3K	Homo sapiens	Eukaryotic translation initiation factor 3 subunit K	0.2	0.2	0	1.09727	6.77736e-07	Stabilized	52	1	0.984054	0.997215	1.02019	0.982696
Q9UBQ5	EIF3K	Homo sapiens	Eukaryotic translation initiation factor 3 subunit K	0.2	0.2	0	1.09727	6.77736e-07	Stabilized	54	1	0.957983	0.911318	0.930651	0.994395
Q9UBQ5	EIF3K	Homo sapiens	Eukaryotic translation initiation factor 3 subunit K	0.2	0.2	0	1.09727	6.77736e-07	Stabilized	56	1	0.942828	0.977203	1.05557	1.12368
Q9UBQ5	EIF3K	Homo sapiens	Eukaryotic translation initiation factor 3 subunit K	0.2	0.2	0	1.09727	6.77736e-07	Stabilized	58	1	1.05583	0.922415	1.18782	1.13399
Q9UBQ5	EIF3K	Homo sapiens	Eukaryotic translation initiation factor 3 subunit K	0.2	0.2	0	1.09727	6.77736e-07	Stabilized	60	1	0.939436	0.878406	1.37774	1.41971
Q9UBQ5	EIF3K	Homo sapiens	Eukaryotic translation initiation factor 3 subunit K	0.2	0.2	0	1.09727	6.77736e-07	Stabilized	62	1	1.22144	1.08178	1.51896	1.70473
Q9UBQ5	EIF3K	Homo sapiens	Eukaryotic translation initiation factor 3 subunit K	0.2	0.2	0	1.09727	6.77736e-07	Stabilized	64	1	1.30747	1.21163	2.1284	2.15892
P49327	FASN	Homo sapiens	Fatty acid synthase	0.2	0.2	0	1.09272	6.77736e-07	Stabilized	42	1	1.34486	0.99504	1.22005	1.21519
P49327	FASN	Homo sapiens	Fatty acid synthase	0.2	0.2	0	1.09272	6.77736e-07	Stabilized	44	1	1.23858	0.945805	1.09049	1.11679
P49327	FASN	Homo sapiens	Fatty acid synthase	0.2	0.2	0	1.09272	6.77736e-07	Stabilized	46	1	1.32809	1.05646	1.17145	1.16753
P49327	FASN	Homo sapiens	Fatty acid synthase	0.2	0.2	0	1.09272	6.77736e-07	Stabilized	48	1	1.09444	0.957357	1.07093	1.01487
P49327	FASN	Homo sapiens	Fatty acid synthase	0.2	0.2	0	1.09272	6.77736e-07	Stabilized	50	1	1.13886	1.05317	1.15817	1.1228
P49327	FASN	Homo sapiens	Fatty acid synthase	0.2	0.2	0	1.09272	6.77736e-07	Stabilized	52	1	0.970021	0.845246	1.01712	0.948319
P49327	FASN	Homo sapiens	Fatty acid synthase	0.2	0.2	0	1.09272	6.77736e-07	Stabilized	54	1	0.941461	0.73571	1.00871	1.05108
P49327	FASN	Homo sapiens	Fatty acid synthase	0.2	0.2	0	1.09272	6.77736e-07	Stabilized	56	1	0.933578	0.815796	1.26024	1.27147
P49327	FASN	Homo sapiens	Fatty acid synthase	0.2	0.2	0	1.09272	6.77736e-07	Stabilized	58	1	1.00646	0.883329	1.28258	1.37111
P49327	FASN	Homo sapiens	Fatty acid synthase	0.2	0.2	0	1.09272	6.77736e-07	Stabilized	60	1	0.902378	0.886285	1.39189	1.4639
P49327	FASN	Homo sapiens	Fatty acid synthase	0.2	0.2	0	1.09272	6.77736e-07	Stabilized	62	1	1.09382	0.919858	1.57276	1.66888
P49327	FASN	Homo sapiens	Fatty acid synthase	0.2	0.2	0	1.09272	6.77736e-07	Stabilized	64	1	0.965455	0.940489	1.43263	1.48172
Q96GG9	DCUN1D1	Homo sapiens	DCN1-like protein 1	0.2	0.2	0	1.08578	6.77736e-07	Stabilized	42	1	0.9189	0.995676	0.939833	0.928353
Q96GG9	DCUN1D1	Homo sapiens	DCN1-like protein 1	0.2	0.2	0	1.08578	6.77736e-07	Stabilized	44	1	1.01525	1.03819	1.00995	1.06134
Q96GG9	DCUN1D1	Homo sapiens	DCN1-like protein 1	0.2	0.2	0	1.08578	6.77736e-07	Stabilized	46	1	1.01117	1.01167	1.05241	1.00333
Q96GG9	DCUN1D1	Homo sapiens	DCN1-like protein 1	0.2	0.2	0	1.08578	6.77736e-07	Stabilized	48	1	0.979544	0.976098	1.04314	0.996299
Q96GG9	DCUN1D1	Homo sapiens	DCN1-like protein 1	0.2	0.2	0	1.08578	6.77736e-07	Stabilized	50	1	0.977543	1.00601	0.938696	1.07797
Q96GG9	DCUN1D1	Homo sapiens	DCN1-like protein 1	0.2	0.2	0	1.08578	6.77736e-07	Stabilized	52	1	0.930897	0.823586	0.963966	0.879312
Q96GG9	DCUN1D1	Homo sapiens	DCN1-like protein 1	0.2	0.2	0	1.08578	6.77736e-07	Stabilized	54	1	0.962923	0.79935	0.937003	1.0554
Q96GG9	DCUN1D1	Homo sapiens	DCN1-like protein 1	0.2	0.2	0	1.08578	6.77736e-07	Stabilized	56	1	0.926386	0.881361	1.21904	1.25066
Q96GG9	DCUN1D1	Homo sapiens	DCN1-like protein 1	0.2	0.2	0	1.08578	6.77736e-07	Stabilized	58	1	1.05328	0.870209	1.24375	1.56447
Q96GG9	DCUN1D1	Homo sapiens	DCN1-like protein 1	0.2	0.2	0	1.08578	6.77736e-07	Stabilized	60	1	0.778396	0.824696	1.48036	1.60839
Q96GG9	DCUN1D1	Homo sapiens	DCN1-like protein 1	0.2	0.2	0	1.08578	6.77736e-07	Stabilized	62	1	1.1924	0.97364	2.03205	2.41196
Q96GG9	DCUN1D1	Homo sapiens	DCN1-like protein 1	0.2	0.2	0	1.08578	6.77736e-07	Stabilized	64	1	1.03278	1.11393	1.62714	1.72816
P53396-2	ACLY	Homo sapiens	Isoform 2 of ATP-citrate synthase	0.2	0.2	0	1.08559	6.77736e-07	Stabilized	42	1	1.08011	0.976268	1.0771	1.04979
P53396-2	ACLY	Homo sapiens	Isoform 2 of ATP-citrate synthase	0.2	0.2	0	1.08559	6.77736e-07	Stabilized	44	1	0.945546	0.939807	1.0319	0.930628
P53396-2	ACLY	Homo sapiens	Isoform 2 of ATP-citrate synthase	0.2	0.2	0	1.08559	6.77736e-07	Stabilized	46	1	0.998336	0.993848	1.03334	0.956728
P53396-2	ACLY	Homo sapiens	Isoform 2 of ATP-citrate synthase	0.2	0.2	0	1.08559	6.77736e-07	Stabilized	48	1	0.994142	0.978447	1.05411	0.977559
P53396-2	ACLY	Homo sapiens	Isoform 2 of ATP-citrate synthase	0.2	0.2	0	1.08559	6.77736e-07	Stabilized	50	NaN	NaN	NaN	NaN	NaN
P53396-2	ACLY	Homo sapiens	Isoform 2 of ATP-citrate synthase	0.2	0.2	0	1.08559	6.77736e-07	Stabilized	52	1	0.901184	0.8877	1.02059	0.922774
P53396-2	ACLY	Homo sapiens	Isoform 2 of ATP-citrate synthase	0.2	0.2	0	1.08559	6.77736e-07	Stabilized	54	NaN	NaN	NaN	NaN	NaN
P53396-2	ACLY	Homo sapiens	Isoform 2 of ATP-citrate synthase	0.2	0.2	0	1.08559	6.77736e-07	Stabilized	56	1	0.941897	0.945868	1.08925	0.983227
P53396-2	ACLY	Homo sapiens	Isoform 2 of ATP-citrate synthase	0.2	0.2	0	1.08559	6.77736e-07	Stabilized	58	1	0.967855	1.03339	1.11334	1.11728
P53396-2	ACLY	Homo sapiens	Isoform 2 of ATP-citrate synthase	0.2	0.2	0	1.08559	6.77736e-07	Stabilized	60	1	0.813902	0.9544	1.63148	1.74243
P53396-2	ACLY	Homo sapiens	Isoform 2 of ATP-citrate synthase	0.2	0.2	0	1.08559	6.77736e-07	Stabilized	62	1	1.11254	1.22825	1.42788	1.74685
P53396-2	ACLY	Homo sapiens	Isoform 2 of ATP-citrate synthase	0.2	0.2	0	1.08559	6.77736e-07	Stabilized	64	1	1.25315	1.00515	2.16257	2.11475
Q9NNW7	TXNRD2	Homo sapiens	Thioredoxin reductase 2, mitochondrial	0.2	0.2	0	1.06756	6.77736e-07	Stabilized	42	1	1.31882	1.34765	1.29146	1.33653
Q9NNW7	TXNRD2	Homo sapiens	Thioredoxin reductase 2, mitochondrial	0.2	0.2	0	1.06756	6.77736e-07	Stabilized	44	1	1.00751	1.07929	1.00933	0.923969
Q9NNW7	TXNRD2	Homo sapiens	Thioredoxin reductase 2, mitochondrial	0.2	0.2	0	1.06756	6.77736e-07	Stabilized	46	1	0.963223	1.0753	0.965022	0.915141
Q9NNW7	TXNRD2	Homo sapiens	Thioredoxin reductase 2, mitochondrial	0.2	0.2	0	1.06756	6.77736e-07	Stabilized	48	1	1.00349	1.01433	0.975946	0.932739
Q9NNW7	TXNRD2	Homo sapiens	Thioredoxin reductase 2, mitochondrial	0.2	0.2	0	1.06756	6.77736e-07	Stabilized	50	1	0.981785	1.02117	0.936711	0.853187
Q9NNW7	TXNRD2	Homo sapiens	Thioredoxin reductase 2, mitochondrial	0.2	0.2	0	1.06756	6.77736e-07	Stabilized	52	1	1.02577	1.16664	1.05539	1.06681
Q9NNW7	TXNRD2	Homo sapiens	Thioredoxin reductase 2, mitochondrial	0.2	0.2	0	1.06756	6.77736e-07	Stabilized	54	1	1.05247	1.15864	1.00888	0.88966
Q9NNW7	TXNRD2	Homo sapiens	Thioredoxin reductase 2, mitochondrial	0.2	0.2	0	1.06756	6.77736e-07	Stabilized	56	1	1.06931	1.2007	1.00053	0.84345
Q9NNW7	TXNRD2	Homo sapiens	Thioredoxin reductase 2, mitochondrial	0.2	0.2	0	1.06756	6.77736e-07	Stabilized	58	1	1.03186	1.143	0.974832	0.899676
Q9NNW7	TXNRD2	Homo sapiens	Thioredoxin reductase 2, mitochondrial	0.2	0.2	0	1.06756	6.77736e-07	Stabilized	60	1	1.20295	1.32354	0.949624	1.02328
Q9NNW7	TXNRD2	Homo sapiens	Thioredoxin reductase 2, mitochondrial	0.2	0.2	0	1.06756	6.77736e-07	Stabilized	62	1	1.65779	1.85539	0.992839	1.20729
Q9NNW7	TXNRD2	Homo sapiens	Thioredoxin reductase 2, mitochondrial	0.2	0.2	0	1.06756	6.77736e-07	Stabilized	64	1	1.1489	1.34181	0.854724	0.955504
P23284	PPIB	Homo sapiens	Peptidyl-prolyl cis-trans isomerase B	0.2	0.2	0	1.06722	6.77736e-07	Solubility/Expression	42	1	1.80845	1.07809	1.11416	1.58238
P23284	PPIB	Homo sapiens	Peptidyl-prolyl cis-trans isomerase B	0.2	0.2	0	1.06722	6.77736e-07	Solubility/Expression	44	1	1.67724	0.89928	1.08879	1.36419
P23284	PPIB	Homo sapiens	Peptidyl-prolyl cis-trans isomerase B	0.2	0.2	0	1.06722	6.77736e-07	Solubility/Expression	46	1	1.36804	1.03914	1.14312	1.39671
P23284	PPIB	Homo sapiens	Peptidyl-prolyl cis-trans isomerase B	0.2	0.2	0	1.06722	6.77736e-07	Solubility/Expression	48	1	1.25544	1.00181	1.26852	1.20651
P23284	PPIB	Homo sapiens	Peptidyl-prolyl cis-trans isomerase B	0.2	0.2	0	1.06722	6.77736e-07	Solubility/Expression	50	1	1.14713	1.15668	1.24302	1.19106
P23284	PPIB	Homo sapiens	Peptidyl-prolyl cis-trans isomerase B	0.2	0.2	0	1.06722	6.77736e-07	Solubility/Expression	52	1	1.02888	1.16052	1.17344	1.08008
P23284	PPIB	Homo sapiens	Peptidyl-prolyl cis-trans isomerase B	0.2	0.2	0	1.06722	6.77736e-07	Solubility/Expression	54	1	1.02601	1.09167	1.00479	0.870668
P23284	PPIB	Homo sapiens	Peptidyl-prolyl cis-trans isomerase B	0.2	0.2	0	1.06722	6.77736e-07	Solubility/Expression	56	1	0.802103	0.880374	0.764184	0.726892
P23284	PPIB	Homo sapiens	Peptidyl-prolyl cis-trans isomerase B	0.2	0.2	0	1.06722	6.77736e-07	Solubility/Expression	58	1	0.9708	1.03663	0.86511	0.821161
P23284	PPIB	Homo sapiens	Peptidyl-prolyl cis-trans isomerase B	0.2	0.2	0	1.06722	6.77736e-07	Solubility/Expression	60	1	0.933378	1.0806	0.874981	0.856188
P23284	PPIB	Homo sapiens	Peptidyl-prolyl cis-trans isomerase B	0.2	0.2	0	1.06722	6.77736e-07	Solubility/Expression	62	1	1.0213	1.14166	0.830458	0.811392
P23284	PPIB	Homo sapiens	Peptidyl-prolyl cis-trans isomerase B	0.2	0.2	0	1.06722	6.77736e-07	Solubility/Expression	64	1	1.06959	1.34867	0.859416	0.872605
Q8N8S7	ENAH	Homo sapiens	Protein enabled homolog	0.2	0.2	0	1.06386	6.77736e-07	Stabilized	42	1	1.03083	1.00009	1.05102	1.02055
Q8N8S7	ENAH	Homo sapiens	Protein enabled homolog	0.2	0.2	0	1.06386	6.77736e-07	Stabilized	44	1	1.00545	0.997584	1.0279	0.973709
Q8N8S7	ENAH	Homo sapiens	Protein enabled homolog	0.2	0.2	0	1.06386	6.77736e-07	Stabilized	46	1	1.01335	1.01077	1.05498	1.00924
Q8N8S7	ENAH	Homo sapiens	Protein enabled homolog	0.2	0.2	0	1.06386	6.77736e-07	Stabilized	48	1	0.978761	0.974666	1.01907	0.990322
Q8N8S7	ENAH	Homo sapiens	Protein enabled homolog	0.2	0.2	0	1.06386	6.77736e-07	Stabilized	50	1	1.0305	0.994761	1.01462	1.00731
Q8N8S7	ENAH	Homo sapiens	Protein enabled homolog	0.2	0.2	0	1.06386	6.77736e-07	Stabilized	52	1	0.979654	0.970305	1.00226	0.974189
Q8N8S7	ENAH	Homo sapiens	Protein enabled homolog	0.2	0.2	0	1.06386	6.77736e-07	Stabilized	54	1	1.02933	1.0569	1.01539	1.04114
Q8N8S7	ENAH	Homo sapiens	Protein enabled homolog	0.2	0.2	0	1.06386	6.77736e-07	Stabilized	56	1	1.00976	0.987659	0.912443	1.05234
Q8N8S7	ENAH	Homo sapiens	Protein enabled homolog	0.2	0.2	0	1.06386	6.77736e-07	Stabilized	58	1	1.14397	1.14326	1.08105	1.20693
Q8N8S7	ENAH	Homo sapiens	Protein enabled homolog	0.2	0.2	0	1.06386	6.77736e-07	Stabilized	60	1	0.962907	0.947303	1.12819	1.31643
Q8N8S7	ENAH	Homo sapiens	Protein enabled homolog	0.2	0.2	0	1.06386	6.77736e-07	Stabilized	62	1	1.15798	1.12181	1.41327	1.50187
Q8N8S7	ENAH	Homo sapiens	Protein enabled homolog	0.2	0.2	0	1.06386	6.77736e-07	Stabilized	64	1	1.0207	1.09431	1.54013	1.81473
Q8NHH9	ATL2	Homo sapiens	Atlastin-2	0.2	0.2	0	1.06057	6.77736e-07	Stabilized	42	1	0.985413	0.939149	0.960174	0.901266
Q8NHH9	ATL2	Homo sapiens	Atlastin-2	0.2	0.2	0	1.06057	6.77736e-07	Stabilized	44	1	1.00433	1.02226	0.985399	1.01843
Q8NHH9	ATL2	Homo sapiens	Atlastin-2	0.2	0.2	0	1.06057	6.77736e-07	Stabilized	46	1	1.01753	1.01335	1.01873	0.973087
Q8NHH9	ATL2	Homo sapiens	Atlastin-2	0.2	0.2	0	1.06057	6.77736e-07	Stabilized	48	1	0.98626	0.960799	0.989116	0.969261
Q8NHH9	ATL2	Homo sapiens	Atlastin-2	0.2	0.2	0	1.06057	6.77736e-07	Stabilized	50	1	0.983071	1.0113	1.03842	1.01949
Q8NHH9	ATL2	Homo sapiens	Atlastin-2	0.2	0.2	0	1.06057	6.77736e-07	Stabilized	52	1	0.980667	0.939827	1.06025	1.09192
Q8NHH9	ATL2	Homo sapiens	Atlastin-2	0.2	0.2	0	1.06057	6.77736e-07	Stabilized	54	1	0.982142	0.870428	1.14896	1.28181
Q8NHH9	ATL2	Homo sapiens	Atlastin-2	0.2	0.2	0	1.06057	6.77736e-07	Stabilized	56	1	0.924062	0.952654	1.15287	1.2072
Q8NHH9	ATL2	Homo sapiens	Atlastin-2	0.2	0.2	0	1.06057	6.77736e-07	Stabilized	58	1	1.08841	1.0002	1.31383	1.3296
Q8NHH9	ATL2	Homo sapiens	Atlastin-2	0.2	0.2	0	1.06057	6.77736e-07	Stabilized	60	1	0.827694	0.940539	1.23871	1.425
Q8NHH9	ATL2	Homo sapiens	Atlastin-2	0.2	0.2	0	1.06057	6.77736e-07	Stabilized	62	1	1.07669	1.0171	1.71478	1.8876
Q8NHH9	ATL2	Homo sapiens	Atlastin-2	0.2	0.2	0	1.06057	6.77736e-07	Stabilized	64	1	0.890034	0.958714	1.24166	1.29399
Q8WXA9-2	SREK1	Homo sapiens	Isoform 2 of Splicing regulatory glutamine/lysine-rich protein 1	0.2	0.2	0	1.05979	6.77736e-07	Stabilized	42	1	1.10346	1.17225	1.07069	1.15887
Q8WXA9-2	SREK1	Homo sapiens	Isoform 2 of Splicing regulatory glutamine/lysine-rich protein 1	0.2	0.2	0	1.05979	6.77736e-07	Stabilized	44	1	1.07362	1.03347	1.15181	1.12726
Q8WXA9-2	SREK1	Homo sapiens	Isoform 2 of Splicing regulatory glutamine/lysine-rich protein 1	0.2	0.2	0	1.05979	6.77736e-07	Stabilized	46	1	1.02869	1.03295	1.05813	1.11536
Q8WXA9-2	SREK1	Homo sapiens	Isoform 2 of Splicing regulatory glutamine/lysine-rich protein 1	0.2	0.2	0	1.05979	6.77736e-07	Stabilized	48	1	0.966879	1.03613	1.11632	1.07984
Q8WXA9-2	SREK1	Homo sapiens	Isoform 2 of Splicing regulatory glutamine/lysine-rich protein 1	0.2	0.2	0	1.05979	6.77736e-07	Stabilized	50	1	0.943485	0.982852	0.889639	0.950423
Q8WXA9-2	SREK1	Homo sapiens	Isoform 2 of Splicing regulatory glutamine/lysine-rich protein 1	0.2	0.2	0	1.05979	6.77736e-07	Stabilized	52	NaN	NaN	NaN	NaN	NaN
Q8WXA9-2	SREK1	Homo sapiens	Isoform 2 of Splicing regulatory glutamine/lysine-rich protein 1	0.2	0.2	0	1.05979	6.77736e-07	Stabilized	54	1	0.780055	0.71899	0.780503	0.686233
Q8WXA9-2	SREK1	Homo sapiens	Isoform 2 of Splicing regulatory glutamine/lysine-rich protein 1	0.2	0.2	0	1.05979	6.77736e-07	Stabilized	56	NaN	NaN	NaN	NaN	NaN
Q8WXA9-2	SREK1	Homo sapiens	Isoform 2 of Splicing regulatory glutamine/lysine-rich protein 1	0.2	0.2	0	1.05979	6.77736e-07	Stabilized	58	1	0.968126	1.0376	0.963001	1.03521
Q8WXA9-2	SREK1	Homo sapiens	Isoform 2 of Splicing regulatory glutamine/lysine-rich protein 1	0.2	0.2	0	1.05979	6.77736e-07	Stabilized	60	1	1.13375	1.77308	1.90892	1.61286
Q8WXA9-2	SREK1	Homo sapiens	Isoform 2 of Splicing regulatory glutamine/lysine-rich protein 1	0.2	0.2	0	1.05979	6.77736e-07	Stabilized	62	1	0.812414	0.798914	1.32452	1.56264
Q8WXA9-2	SREK1	Homo sapiens	Isoform 2 of Splicing regulatory glutamine/lysine-rich protein 1	0.2	0.2	0	1.05979	6.77736e-07	Stabilized	64	1	1.09549	1.00731	1.28241	1.21332
Q16539	MAPK14	Homo sapiens	Mitogen-activated protein kinase 14	0.2	0.2	0	1.04973	6.77736e-07	Stabilized	42	1	0.916283	1.0175	0.941606	0.933567
Q16539	MAPK14	Homo sapiens	Mitogen-activated protein kinase 14	0.2	0.2	0	1.04973	6.77736e-07	Stabilized	44	1	1.00306	0.997726	0.944604	0.999559
Q16539	MAPK14	Homo sapiens	Mitogen-activated protein kinase 14	0.2	0.2	0	1.04973	6.77736e-07	Stabilized	46	1	0.958969	0.948616	0.964232	0.95966
Q16539	MAPK14	Homo sapiens	Mitogen-activated protein kinase 14	0.2	0.2	0	1.04973	6.77736e-07	Stabilized	48	1	1.01426	1.05581	0.93651	1.01347
Q16539	MAPK14	Homo sapiens	Mitogen-activated protein kinase 14	0.2	0.2	0	1.04973	6.77736e-07	Stabilized	50	1	0.920561	0.868527	0.846771	0.99359
Q16539	MAPK14	Homo sapiens	Mitogen-activated protein kinase 14	0.2	0.2	0	1.04973	6.77736e-07	Stabilized	52	1	0.974758	1.0037	0.905968	1.08711
Q16539	MAPK14	Homo sapiens	Mitogen-activated protein kinase 14	0.2	0.2	0	1.04973	6.77736e-07	Stabilized	54	1	1.10583	0.976821	1.24211	1.23212
Q16539	MAPK14	Homo sapiens	Mitogen-activated protein kinase 14	0.2	0.2	0	1.04973	6.77736e-07	Stabilized	56	1	1.12574	0.711868	0.990348	1.879
Q16539	MAPK14	Homo sapiens	Mitogen-activated protein kinase 14	0.2	0.2	0	1.04973	6.77736e-07	Stabilized	58	1	1.05977	1.00014	1.32209	1.47648
Q16539	MAPK14	Homo sapiens	Mitogen-activated protein kinase 14	0.2	0.2	0	1.04973	6.77736e-07	Stabilized	60	1	1.10449	1.14626	1.32719	1.36813
Q16539	MAPK14	Homo sapiens	Mitogen-activated protein kinase 14	0.2	0.2	0	1.04973	6.77736e-07	Stabilized	62	1	1.14338	1.22271	0.917873	1.03325
Q16539	MAPK14	Homo sapiens	Mitogen-activated protein kinase 14	0.2	0.2	0	1.04973	6.77736e-07	Stabilized	64	1	0.962316	1.03992	1.18375	1.20571
Q9BTX1	NDC1	Homo sapiens	Nucleoporin NDC1	0.2	0.2	0	1.04698	6.77736e-07	Stabilized	42	1	0.871577	0.874816	0.878032	0.819239
Q9BTX1	NDC1	Homo sapiens	Nucleoporin NDC1	0.2	0.2	0	1.04698	6.77736e-07	Stabilized	44	1	1.03582	1.00781	0.924334	0.93277
Q9BTX1	NDC1	Homo sapiens	Nucleoporin NDC1	0.2	0.2	0	1.04698	6.77736e-07	Stabilized	46	1	1.01165	1.06583	1.02516	1.06297
Q9BTX1	NDC1	Homo sapiens	Nucleoporin NDC1	0.2	0.2	0	1.04698	6.77736e-07	Stabilized	48	1	0.883821	1.01658	1.0682	1.00714
Q9BTX1	NDC1	Homo sapiens	Nucleoporin NDC1	0.2	0.2	0	1.04698	6.77736e-07	Stabilized	50	1	0.974769	0.959158	0.859189	0.851172
Q9BTX1	NDC1	Homo sapiens	Nucleoporin NDC1	0.2	0.2	0	1.04698	6.77736e-07	Stabilized	52	1	1.03398	1.13524	0.982574	0.964484
Q9BTX1	NDC1	Homo sapiens	Nucleoporin NDC1	0.2	0.2	0	1.04698	6.77736e-07	Stabilized	54	1	1.02945	0.981207	0.93002	1.05722
Q9BTX1	NDC1	Homo sapiens	Nucleoporin NDC1	0.2	0.2	0	1.04698	6.77736e-07	Stabilized	56	1	1.06063	1.00821	1.04885	1.08944
Q9BTX1	NDC1	Homo sapiens	Nucleoporin NDC1	0.2	0.2	0	1.04698	6.77736e-07	Stabilized	58	1	1.14341	1.0945	1.03582	1.26116
Q9BTX1	NDC1	Homo sapiens	Nucleoporin NDC1	0.2	0.2	0	1.04698	6.77736e-07	Stabilized	60	1	0.879953	1.57803	2.61365	2.01489
Q9BTX1	NDC1	Homo sapiens	Nucleoporin NDC1	0.2	0.2	0	1.04698	6.77736e-07	Stabilized	62	1	0.972802	0.862554	1.19442	1.20968
Q9BTX1	NDC1	Homo sapiens	Nucleoporin NDC1	0.2	0.2	0	1.04698	6.77736e-07	Stabilized	64	1	0.971775	0.885489	0.819533	0.829678
P20936	RASA1	Homo sapiens	Ras GTPase-activating protein 1	0.2	0.216667	0.0166667	1.04653	6.77736e-07	Stabilized	42	1	0.919728	1.00445	0.982741	1.04298
P20936	RASA1	Homo sapiens	Ras GTPase-activating protein 1	0.2	0.216667	0.0166667	1.04653	6.77736e-07	Stabilized	44	1	0.966297	0.984026	0.986244	0.980788
P20936	RASA1	Homo sapiens	Ras GTPase-activating protein 1	0.2	0.216667	0.0166667	1.04653	6.77736e-07	Stabilized	46	1	0.955343	0.978674	0.998304	0.983784
P20936	RASA1	Homo sapiens	Ras GTPase-activating protein 1	0.2	0.216667	0.0166667	1.04653	6.77736e-07	Stabilized	48	1	0.983935	0.963223	0.988393	1.0249
P20936	RASA1	Homo sapiens	Ras GTPase-activating protein 1	0.2	0.216667	0.0166667	1.04653	6.77736e-07	Stabilized	50	1	1.02605	0.9385	0.930598	1.08914
P20936	RASA1	Homo sapiens	Ras GTPase-activating protein 1	0.2	0.216667	0.0166667	1.04653	6.77736e-07	Stabilized	52	NaN	NaN	NaN	NaN	NaN
P20936	RASA1	Homo sapiens	Ras GTPase-activating protein 1	0.2	0.216667	0.0166667	1.04653	6.77736e-07	Stabilized	54	1	1.12742	0.607325	1.28654	1.25609
P20936	RASA1	Homo sapiens	Ras GTPase-activating protein 1	0.2	0.216667	0.0166667	1.04653	6.77736e-07	Stabilized	56	NaN	NaN	NaN	NaN	NaN
P20936	RASA1	Homo sapiens	Ras GTPase-activating protein 1	0.2	0.216667	0.0166667	1.04653	6.77736e-07	Stabilized	58	1	0.951055	0.895947	1.10045	1.12436
P20936	RASA1	Homo sapiens	Ras GTPase-activating protein 1	0.2	0.216667	0.0166667	1.04653	6.77736e-07	Stabilized	60	1	1.06634	0.844458	1.36569	1.3245
P20936	RASA1	Homo sapiens	Ras GTPase-activating protein 1	0.2	0.216667	0.0166667	1.04653	6.77736e-07	Stabilized	62	1	1.15603	1.43782	1.75284	1.27718
P20936	RASA1	Homo sapiens	Ras GTPase-activating protein 1	0.2	0.216667	0.0166667	1.04653	6.77736e-07	Stabilized	64	1	0.953026	0.939889	1.30321	1.29331
E7ESZ7	NDUFA10	Homo sapiens	NADH dehydrogenase [ubiquinone] 1 alpha subcomplex subunit 10, mitochondrial	0.2	0.2	0	1.03843	6.77736e-07	Stabilized	42	1	0.966068	0.954407	1.02056	0.763788
E7ESZ7	NDUFA10	Homo sapiens	NADH dehydrogenase [ubiquinone] 1 alpha subcomplex subunit 10, mitochondrial	0.2	0.2	0	1.03843	6.77736e-07	Stabilized	44	1	0.930558	0.993834	0.932532	0.914461
E7ESZ7	NDUFA10	Homo sapiens	NADH dehydrogenase [ubiquinone] 1 alpha subcomplex subunit 10, mitochondrial	0.2	0.2	0	1.03843	6.77736e-07	Stabilized	46	1	0.998969	1.02611	1.00864	0.996502
E7ESZ7	NDUFA10	Homo sapiens	NADH dehydrogenase [ubiquinone] 1 alpha subcomplex subunit 10, mitochondrial	0.2	0.2	0	1.03843	6.77736e-07	Stabilized	48	1	0.990834	1.00466	1.02221	1.02866
E7ESZ7	NDUFA10	Homo sapiens	NADH dehydrogenase [ubiquinone] 1 alpha subcomplex subunit 10, mitochondrial	0.2	0.2	0	1.03843	6.77736e-07	Stabilized	50	1	0.925933	0.906676	0.973645	0.970708
E7ESZ7	NDUFA10	Homo sapiens	NADH dehydrogenase [ubiquinone] 1 alpha subcomplex subunit 10, mitochondrial	0.2	0.2	0	1.03843	6.77736e-07	Stabilized	52	1	0.935168	0.779895	1.04639	1.01712
E7ESZ7	NDUFA10	Homo sapiens	NADH dehydrogenase [ubiquinone] 1 alpha subcomplex subunit 10, mitochondrial	0.2	0.2	0	1.03843	6.77736e-07	Stabilized	54	1	0.990879	0.90967	1.12445	1.1127
E7ESZ7	NDUFA10	Homo sapiens	NADH dehydrogenase [ubiquinone] 1 alpha subcomplex subunit 10, mitochondrial	0.2	0.2	0	1.03843	6.77736e-07	Stabilized	56	1	0.949887	0.957483	1.08648	1.00966
E7ESZ7	NDUFA10	Homo sapiens	NADH dehydrogenase [ubiquinone] 1 alpha subcomplex subunit 10, mitochondrial	0.2	0.2	0	1.03843	6.77736e-07	Stabilized	58	1	1.03984	1.06606	1.10633	1.31688
E7ESZ7	NDUFA10	Homo sapiens	NADH dehydrogenase [ubiquinone] 1 alpha subcomplex subunit 10, mitochondrial	0.2	0.2	0	1.03843	6.77736e-07	Stabilized	60	1	0.907379	0.866721	1.2116	1.33295
E7ESZ7	NDUFA10	Homo sapiens	NADH dehydrogenase [ubiquinone] 1 alpha subcomplex subunit 10, mitochondrial	0.2	0.2	0	1.03843	6.77736e-07	Stabilized	62	1	0.925759	0.893681	1.6139	1.53248
E7ESZ7	NDUFA10	Homo sapiens	NADH dehydrogenase [ubiquinone] 1 alpha subcomplex subunit 10, mitochondrial	0.2	0.2	0	1.03843	6.77736e-07	Stabilized	64	1	1.02529	0.785396	1.68773	1.74454
P00395	MT-CO1	Homo sapiens	Cytochrome c oxidase subunit 1	0.2	0.2	0	1.03756	6.77736e-07	Stabilized	42	1	1.18091	1.2033	1.17705	1.01863
P00395	MT-CO1	Homo sapiens	Cytochrome c oxidase subunit 1	0.2	0.2	0	1.03756	6.77736e-07	Stabilized	44	1	0.941687	0.979839	0.869431	0.855551
P00395	MT-CO1	Homo sapiens	Cytochrome c oxidase subunit 1	0.2	0.2	0	1.03756	6.77736e-07	Stabilized	46	1	0.948564	1.03914	0.943829	0.896194
P00395	MT-CO1	Homo sapiens	Cytochrome c oxidase subunit 1	0.2	0.2	0	1.03756	6.77736e-07	Stabilized	48	1	1.05483	1.19904	1.05056	1.08064
P00395	MT-CO1	Homo sapiens	Cytochrome c oxidase subunit 1	0.2	0.2	0	1.03756	6.77736e-07	Stabilized	50	1	1.00828	1.02127	0.979178	0.973763
P00395	MT-CO1	Homo sapiens	Cytochrome c oxidase subunit 1	0.2	0.2	0	1.03756	6.77736e-07	Stabilized	52	1	0.952266	1.10757	1.02235	0.906589
P00395	MT-CO1	Homo sapiens	Cytochrome c oxidase subunit 1	0.2	0.2	0	1.03756	6.77736e-07	Stabilized	54	1	1.0748	1.26997	0.920673	0.937336
P00395	MT-CO1	Homo sapiens	Cytochrome c oxidase subunit 1	0.2	0.2	0	1.03756	6.77736e-07	Stabilized	56	1	1.10804	1.20664	0.918043	0.743969
P00395	MT-CO1	Homo sapiens	Cytochrome c oxidase subunit 1	0.2	0.2	0	1.03756	6.77736e-07	Stabilized	58	1	1.08191	1.25924	0.849525	0.799544
P00395	MT-CO1	Homo sapiens	Cytochrome c oxidase subunit 1	0.2	0.2	0	1.03756	6.77736e-07	Stabilized	60	1	1.30712	1.65364	0.985399	1.095
P00395	MT-CO1	Homo sapiens	Cytochrome c oxidase subunit 1	0.2	0.2	0	1.03756	6.77736e-07	Stabilized	62	1	1.06997	1.5659	0.670757	0.945008
P00395	MT-CO1	Homo sapiens	Cytochrome c oxidase subunit 1	0.2	0.2	0	1.03756	6.77736e-07	Stabilized	64	1	1.05328	1.51392	0.844308	0.969155
Q9UJX5-3	ANAPC4	Homo sapiens	Isoform 3 of Anaphase-promoting complex subunit 4	0.2	0.233333	0.0333333	1.01709	6.77736e-07	Stabilized	42	1	0.984151	0.939755	0.927627	0.848353
Q9UJX5-3	ANAPC4	Homo sapiens	Isoform 3 of Anaphase-promoting complex subunit 4	0.2	0.233333	0.0333333	1.01709	6.77736e-07	Stabilized	44	1	1.10909	1.18277	1.09635	1.09178
Q9UJX5-3	ANAPC4	Homo sapiens	Isoform 3 of Anaphase-promoting complex subunit 4	0.2	0.233333	0.0333333	1.01709	6.77736e-07	Stabilized	46	1	0.902704	0.777403	0.981904	0.987718
Q9UJX5-3	ANAPC4	Homo sapiens	Isoform 3 of Anaphase-promoting complex subunit 4	0.2	0.233333	0.0333333	1.01709	6.77736e-07	Stabilized	48	1	0.794752	0.801659	0.77027	0.770994
Q9UJX5-3	ANAPC4	Homo sapiens	Isoform 3 of Anaphase-promoting complex subunit 4	0.2	0.233333	0.0333333	1.01709	6.77736e-07	Stabilized	50	1	0.931287	0.972929	1.13308	1.0413
Q9UJX5-3	ANAPC4	Homo sapiens	Isoform 3 of Anaphase-promoting complex subunit 4	0.2	0.233333	0.0333333	1.01709	6.77736e-07	Stabilized	52	1	0.992876	0.997268	0.638916	0.861104
Q9UJX5-3	ANAPC4	Homo sapiens	Isoform 3 of Anaphase-promoting complex subunit 4	0.2	0.233333	0.0333333	1.01709	6.77736e-07	Stabilized	54	1	0.734252	0.898092	0.99732	1.00386
Q9UJX5-3	ANAPC4	Homo sapiens	Isoform 3 of Anaphase-promoting complex subunit 4	0.2	0.233333	0.0333333	1.01709	6.77736e-07	Stabilized	56	1	1.33376	1.01175	1.0133	1.41118
Q9UJX5-3	ANAPC4	Homo sapiens	Isoform 3 of Anaphase-promoting complex subunit 4	0.2	0.233333	0.0333333	1.01709	6.77736e-07	Stabilized	58	1	1.02068	0.790748	1.40709	1.51798
Q9UJX5-3	ANAPC4	Homo sapiens	Isoform 3 of Anaphase-promoting complex subunit 4	0.2	0.233333	0.0333333	1.01709	6.77736e-07	Stabilized	60	1	1.2567	1.35612	1.64563	1.75577
Q9UJX5-3	ANAPC4	Homo sapiens	Isoform 3 of Anaphase-promoting complex subunit 4	0.2	0.233333	0.0333333	1.01709	6.77736e-07	Stabilized	62	1	1.01438	0.861655	1.08922	0.546387
Q9UJX5-3	ANAPC4	Homo sapiens	Isoform 3 of Anaphase-promoting complex subunit 4	0.2	0.233333	0.0333333	1.01709	6.77736e-07	Stabilized	64	1	1.1041	0.86333	1.02458	0.831253
O60524	NEMF	Homo sapiens	Nuclear export mediator factor NEMF	0.2	0.2	0	1.01317	6.77736e-07	Stabilized	42	1	0.962292	0.931139	1.00504	0.974144
O60524	NEMF	Homo sapiens	Nuclear export mediator factor NEMF	0.2	0.2	0	1.01317	6.77736e-07	Stabilized	44	1	0.902001	0.914389	0.950733	0.898918
O60524	NEMF	Homo sapiens	Nuclear export mediator factor NEMF	0.2	0.2	0	1.01317	6.77736e-07	Stabilized	46	1	0.93205	0.928569	0.980604	0.930357
O60524	NEMF	Homo sapiens	Nuclear export mediator factor NEMF	0.2	0.2	0	1.01317	6.77736e-07	Stabilized	48	1	0.914434	0.919827	1.01551	0.993266
O60524	NEMF	Homo sapiens	Nuclear export mediator factor NEMF	0.2	0.2	0	1.01317	6.77736e-07	Stabilized	50	1	0.91105	0.845148	0.959994	0.931558
O60524	NEMF	Homo sapiens	Nuclear export mediator factor NEMF	0.2	0.2	0	1.01317	6.77736e-07	Stabilized	52	NaN	NaN	NaN	NaN	NaN
O60524	NEMF	Homo sapiens	Nuclear export mediator factor NEMF	0.2	0.2	0	1.01317	6.77736e-07	Stabilized	54	1	1.10729	0.976325	1.07155	0.995151
O60524	NEMF	Homo sapiens	Nuclear export mediator factor NEMF	0.2	0.2	0	1.01317	6.77736e-07	Stabilized	56	NaN	NaN	NaN	NaN	NaN
O60524	NEMF	Homo sapiens	Nuclear export mediator factor NEMF	0.2	0.2	0	1.01317	6.77736e-07	Stabilized	58	1	0.944067	1.05832	1.06184	1.07696
O60524	NEMF	Homo sapiens	Nuclear export mediator factor NEMF	0.2	0.2	0	1.01317	6.77736e-07	Stabilized	60	1	0.971997	0.958744	1.08217	1.05876
O60524	NEMF	Homo sapiens	Nuclear export mediator factor NEMF	0.2	0.2	0	1.01317	6.77736e-07	Stabilized	62	1	0.952177	1.0403	1.18706	1.20175
O60524	NEMF	Homo sapiens	Nuclear export mediator factor NEMF	0.2	0.2	0	1.01317	6.77736e-07	Stabilized	64	1	1.09899	1.10165	1.40884	1.63497
J3KRZ4	DCXR	Homo sapiens	L-xylulose reductase (Fragment)	0.183333	0.2	0.0166667	1.09852	5.26782e-06	Stabilized	42	NaN	NaN	NaN	NaN	NaN
J3KRZ4	DCXR	Homo sapiens	L-xylulose reductase (Fragment)	0.183333	0.2	0.0166667	1.09852	5.26782e-06	Stabilized	44	1	0.88011	0.892075	0.779795	0.708662
J3KRZ4	DCXR	Homo sapiens	L-xylulose reductase (Fragment)	0.183333	0.2	0.0166667	1.09852	5.26782e-06	Stabilized	46	1	1.67961	0.979429	1.23472	1.21646
J3KRZ4	DCXR	Homo sapiens	L-xylulose reductase (Fragment)	0.183333	0.2	0.0166667	1.09852	5.26782e-06	Stabilized	48	1	1.07917	1.14232	0.793934	0.831038
J3KRZ4	DCXR	Homo sapiens	L-xylulose reductase (Fragment)	0.183333	0.2	0.0166667	1.09852	5.26782e-06	Stabilized	50	1	1.05083	1.02053	1.03603	1.04622
J3KRZ4	DCXR	Homo sapiens	L-xylulose reductase (Fragment)	0.183333	0.2	0.0166667	1.09852	5.26782e-06	Stabilized	52	1	1.11787	0.742096	0.791244	1.17223
J3KRZ4	DCXR	Homo sapiens	L-xylulose reductase (Fragment)	0.183333	0.2	0.0166667	1.09852	5.26782e-06	Stabilized	54	1	1.29025	1.11243	1.23429	1.28504
J3KRZ4	DCXR	Homo sapiens	L-xylulose reductase (Fragment)	0.183333	0.2	0.0166667	1.09852	5.26782e-06	Stabilized	56	1	1.7298	1.38471	1.66742	1.56678
J3KRZ4	DCXR	Homo sapiens	L-xylulose reductase (Fragment)	0.183333	0.2	0.0166667	1.09852	5.26782e-06	Stabilized	58	1	1.07549	1.29498	1.6398	1.52724
J3KRZ4	DCXR	Homo sapiens	L-xylulose reductase (Fragment)	0.183333	0.2	0.0166667	1.09852	5.26782e-06	Stabilized	60	1	1.138	0.708502	1.56464	1.30671
J3KRZ4	DCXR	Homo sapiens	L-xylulose reductase (Fragment)	0.183333	0.2	0.0166667	1.09852	5.26782e-06	Stabilized	62	NaN	NaN	NaN	NaN	NaN
J3KRZ4	DCXR	Homo sapiens	L-xylulose reductase (Fragment)	0.183333	0.2	0.0166667	1.09852	5.26782e-06	Stabilized	64	1	1.40168	0.923394	1.28192	0.58376
P24534	EEF1B2	Homo sapiens	Elongation factor 1-beta	0.183333	0.183333	0	1.24657	5.26782e-06	Solubility/Expression	42	1	2.84361	1.18986	1.61193	2.04694
P24534	EEF1B2	Homo sapiens	Elongation factor 1-beta	0.183333	0.183333	0	1.24657	5.26782e-06	Solubility/Expression	44	1	2.54374	0.863078	1.09148	1.84635
P24534	EEF1B2	Homo sapiens	Elongation factor 1-beta	0.183333	0.183333	0	1.24657	5.26782e-06	Solubility/Expression	46	1	2.30201	0.98093	1.1962	1.76092
P24534	EEF1B2	Homo sapiens	Elongation factor 1-beta	0.183333	0.183333	0	1.24657	5.26782e-06	Solubility/Expression	48	1	1.98419	0.991149	0.974817	1.47274
P24534	EEF1B2	Homo sapiens	Elongation factor 1-beta	0.183333	0.183333	0	1.24657	5.26782e-06	Solubility/Expression	50	1	1.07831	0.91821	0.895429	1.0858
P24534	EEF1B2	Homo sapiens	Elongation factor 1-beta	0.183333	0.183333	0	1.24657	5.26782e-06	Solubility/Expression	52	1	0.881413	0.686177	0.823611	0.763988
P24534	EEF1B2	Homo sapiens	Elongation factor 1-beta	0.183333	0.183333	0	1.24657	5.26782e-06	Solubility/Expression	54	1	0.960295	0.910274	1.12347	1.18487
P24534	EEF1B2	Homo sapiens	Elongation factor 1-beta	0.183333	0.183333	0	1.24657	5.26782e-06	Solubility/Expression	56	1	0.779299	0.699205	0.947267	0.981604
P24534	EEF1B2	Homo sapiens	Elongation factor 1-beta	0.183333	0.183333	0	1.24657	5.26782e-06	Solubility/Expression	58	1	0.963705	0.950095	1.44294	1.56319
P24534	EEF1B2	Homo sapiens	Elongation factor 1-beta	0.183333	0.183333	0	1.24657	5.26782e-06	Solubility/Expression	60	1	0.909443	0.938649	2.06013	2.23824
P24534	EEF1B2	Homo sapiens	Elongation factor 1-beta	0.183333	0.183333	0	1.24657	5.26782e-06	Solubility/Expression	62	1	0.979614	0.934481	1.74429	2.05892
P24534	EEF1B2	Homo sapiens	Elongation factor 1-beta	0.183333	0.183333	0	1.24657	5.26782e-06	Solubility/Expression	64	1	0.950136	0.990172	1.81026	1.84062
P26038	MSN	Homo sapiens	Moesin	0.183333	0.183333	0	1.19889	5.26782e-06	Solubility/Expression	42	1	1.64299	1.06453	1.14094	1.52341
P26038	MSN	Homo sapiens	Moesin	0.183333	0.183333	0	1.19889	5.26782e-06	Solubility/Expression	44	1	1.66411	0.927968	1.11561	1.3801
P26038	MSN	Homo sapiens	Moesin	0.183333	0.183333	0	1.19889	5.26782e-06	Solubility/Expression	46	1	2.02817	1.13568	1.04832	1.5677
P26038	MSN	Homo sapiens	Moesin	0.183333	0.183333	0	1.19889	5.26782e-06	Solubility/Expression	48	1	1.40944	1.02997	1.24522	1.16555
P26038	MSN	Homo sapiens	Moesin	0.183333	0.183333	0	1.19889	5.26782e-06	Solubility/Expression	50	1	1.69946	1.11194	1.24131	1.54275
P26038	MSN	Homo sapiens	Moesin	0.183333	0.183333	0	1.19889	5.26782e-06	Solubility/Expression	52	1	1.98881	1.11171	1.2682	1.61662
P26038	MSN	Homo sapiens	Moesin	0.183333	0.183333	0	1.19889	5.26782e-06	Solubility/Expression	54	1	0.918571	0.778755	0.83278	0.971636
P26038	MSN	Homo sapiens	Moesin	0.183333	0.183333	0	1.19889	5.26782e-06	Solubility/Expression	56	1	0.985419	0.94209	1.15483	1.23823
P26038	MSN	Homo sapiens	Moesin	0.183333	0.183333	0	1.19889	5.26782e-06	Solubility/Expression	58	1	1.03056	0.996687	1.1699	1.24551
P26038	MSN	Homo sapiens	Moesin	0.183333	0.183333	0	1.19889	5.26782e-06	Solubility/Expression	60	1	0.901068	0.938234	1.18909	1.29473
P26038	MSN	Homo sapiens	Moesin	0.183333	0.183333	0	1.19889	5.26782e-06	Solubility/Expression	62	1	1.09586	0.913162	1.63065	1.67409
P26038	MSN	Homo sapiens	Moesin	0.183333	0.183333	0	1.19889	5.26782e-06	Solubility/Expression	64	1	0.947437	0.891423	1.74062	1.78157
P52209	PGD	Homo sapiens	6-phosphogluconate dehydrogenase, decarboxylating	0.183333	0.183333	0	1.19109	5.26782e-06	Solubility/Expression	42	1	1.7831	1.07818	1.47878	1.53344
P52209	PGD	Homo sapiens	6-phosphogluconate dehydrogenase, decarboxylating	0.183333	0.183333	0	1.19109	5.26782e-06	Solubility/Expression	44	1	1.20902	0.954147	1.0377	1.27282
P52209	PGD	Homo sapiens	6-phosphogluconate dehydrogenase, decarboxylating	0.183333	0.183333	0	1.19109	5.26782e-06	Solubility/Expression	46	1	1.8994	1.0034	1.03003	1.44333
P52209	PGD	Homo sapiens	6-phosphogluconate dehydrogenase, decarboxylating	0.183333	0.183333	0	1.19109	5.26782e-06	Solubility/Expression	48	1	1.53855	1.11156	1.0959	1.24468
P52209	PGD	Homo sapiens	6-phosphogluconate dehydrogenase, decarboxylating	0.183333	0.183333	0	1.19109	5.26782e-06	Solubility/Expression	50	1	1.05069	1.10619	1.05705	1.18678
P52209	PGD	Homo sapiens	6-phosphogluconate dehydrogenase, decarboxylating	0.183333	0.183333	0	1.19109	5.26782e-06	Solubility/Expression	52	1	1.20735	1.11111	1.10138	1.21863
P52209	PGD	Homo sapiens	6-phosphogluconate dehydrogenase, decarboxylating	0.183333	0.183333	0	1.19109	5.26782e-06	Solubility/Expression	54	1	0.815137	1.06338	0.822128	0.852235
P52209	PGD	Homo sapiens	6-phosphogluconate dehydrogenase, decarboxylating	0.183333	0.183333	0	1.19109	5.26782e-06	Solubility/Expression	56	1	0.943207	1.13634	1.07175	1.12942
P52209	PGD	Homo sapiens	6-phosphogluconate dehydrogenase, decarboxylating	0.183333	0.183333	0	1.19109	5.26782e-06	Solubility/Expression	58	1	1.2309	1.05489	1.45584	1.65857
P52209	PGD	Homo sapiens	6-phosphogluconate dehydrogenase, decarboxylating	0.183333	0.183333	0	1.19109	5.26782e-06	Solubility/Expression	60	1	0.868731	0.887669	1.48304	1.54012
P52209	PGD	Homo sapiens	6-phosphogluconate dehydrogenase, decarboxylating	0.183333	0.183333	0	1.19109	5.26782e-06	Solubility/Expression	62	1	1.25064	0.978948	1.97466	2.51761
P52209	PGD	Homo sapiens	6-phosphogluconate dehydrogenase, decarboxylating	0.183333	0.183333	0	1.19109	5.26782e-06	Solubility/Expression	64	1	0.962775	0.939982	1.49262	1.5814
P60842	EIF4A1	Homo sapiens	Eukaryotic initiation factor 4A-I	0.183333	0.183333	0	1.15898	5.26782e-06	Solubility/Expression	42	1	1.97941	1.07809	1.40034	1.70407
P60842	EIF4A1	Homo sapiens	Eukaryotic initiation factor 4A-I	0.183333	0.183333	0	1.15898	5.26782e-06	Solubility/Expression	44	1	1.39331	0.90229	1.22195	1.23232
P60842	EIF4A1	Homo sapiens	Eukaryotic initiation factor 4A-I	0.183333	0.183333	0	1.15898	5.26782e-06	Solubility/Expression	46	1	1.87654	0.917248	1.03925	1.68017
P60842	EIF4A1	Homo sapiens	Eukaryotic initiation factor 4A-I	0.183333	0.183333	0	1.15898	5.26782e-06	Solubility/Expression	48	1	1.21704	0.875059	1.38249	1.22403
P60842	EIF4A1	Homo sapiens	Eukaryotic initiation factor 4A-I	0.183333	0.183333	0	1.15898	5.26782e-06	Solubility/Expression	50	1	1.1567	1.04508	1.18054	1.16628
P60842	EIF4A1	Homo sapiens	Eukaryotic initiation factor 4A-I	0.183333	0.183333	0	1.15898	5.26782e-06	Solubility/Expression	52	1	0.920121	0.848697	0.94572	0.908831
P60842	EIF4A1	Homo sapiens	Eukaryotic initiation factor 4A-I	0.183333	0.183333	0	1.15898	5.26782e-06	Solubility/Expression	54	1	0.977361	0.963289	1.02025	1.08502
P60842	EIF4A1	Homo sapiens	Eukaryotic initiation factor 4A-I	0.183333	0.183333	0	1.15898	5.26782e-06	Solubility/Expression	56	1	0.951171	1.00027	1.01653	0.981522
P60842	EIF4A1	Homo sapiens	Eukaryotic initiation factor 4A-I	0.183333	0.183333	0	1.15898	5.26782e-06	Solubility/Expression	58	1	1.07595	1.00366	1.2392	1.29121
P60842	EIF4A1	Homo sapiens	Eukaryotic initiation factor 4A-I	0.183333	0.183333	0	1.15898	5.26782e-06	Solubility/Expression	60	1	0.924599	0.879435	1.2615	1.40826
P60842	EIF4A1	Homo sapiens	Eukaryotic initiation factor 4A-I	0.183333	0.183333	0	1.15898	5.26782e-06	Solubility/Expression	62	1	1.29359	0.994557	1.656	1.87556
P60842	EIF4A1	Homo sapiens	Eukaryotic initiation factor 4A-I	0.183333	0.183333	0	1.15898	5.26782e-06	Solubility/Expression	64	1	1.10665	0.934761	1.61287	1.69001
Q8NEM2	SHCBP1	Homo sapiens	SHC SH2 domain-binding protein 1	0.183333	0.183333	0	1.15367	5.26782e-06	Stabilized	42	1	0.989857	0.88586	0.940072	0.949733
Q8NEM2	SHCBP1	Homo sapiens	SHC SH2 domain-binding protein 1	0.183333	0.183333	0	1.15367	5.26782e-06	Stabilized	44	1	1.01858	0.97444	0.98293	1.02281
Q8NEM2	SHCBP1	Homo sapiens	SHC SH2 domain-binding protein 1	0.183333	0.183333	0	1.15367	5.26782e-06	Stabilized	46	1	0.957549	0.919861	0.986344	1.02351
Q8NEM2	SHCBP1	Homo sapiens	SHC SH2 domain-binding protein 1	0.183333	0.183333	0	1.15367	5.26782e-06	Stabilized	48	1	1.00492	0.86471	0.904163	0.96718
Q8NEM2	SHCBP1	Homo sapiens	SHC SH2 domain-binding protein 1	0.183333	0.183333	0	1.15367	5.26782e-06	Stabilized	50	1	0.924135	0.783241	0.678442	0.838153
Q8NEM2	SHCBP1	Homo sapiens	SHC SH2 domain-binding protein 1	0.183333	0.183333	0	1.15367	5.26782e-06	Stabilized	52	1	1.03885	0.828226	1.02948	1.01345
Q8NEM2	SHCBP1	Homo sapiens	SHC SH2 domain-binding protein 1	0.183333	0.183333	0	1.15367	5.26782e-06	Stabilized	54	1	0.838441	0.819041	1.42606	1.46406
Q8NEM2	SHCBP1	Homo sapiens	SHC SH2 domain-binding protein 1	0.183333	0.183333	0	1.15367	5.26782e-06	Stabilized	56	1	1.08822	1.10575	1.29205	1.67357
Q8NEM2	SHCBP1	Homo sapiens	SHC SH2 domain-binding protein 1	0.183333	0.183333	0	1.15367	5.26782e-06	Stabilized	58	1	1.57552	1.121	1.99601	2.0993
Q8NEM2	SHCBP1	Homo sapiens	SHC SH2 domain-binding protein 1	0.183333	0.183333	0	1.15367	5.26782e-06	Stabilized	60	1	0.923401	0.880034	1.33695	1.56098
Q8NEM2	SHCBP1	Homo sapiens	SHC SH2 domain-binding protein 1	0.183333	0.183333	0	1.15367	5.26782e-06	Stabilized	62	1	1.51667	1.35604	1.81147	2.30807
Q8NEM2	SHCBP1	Homo sapiens	SHC SH2 domain-binding protein 1	0.183333	0.183333	0	1.15367	5.26782e-06	Stabilized	64	1	1.37831	0.971684	1.98427	2.16676
P68402	PAFAH1B2	Homo sapiens	Platelet-activating factor acetylhydrolase IB subunit beta	0.183333	0.183333	0	1.14666	5.26782e-06	Stabilized	42	1	1.08141	1.13361	1.04525	1.0824
P68402	PAFAH1B2	Homo sapiens	Platelet-activating factor acetylhydrolase IB subunit beta	0.183333	0.183333	0	1.14666	5.26782e-06	Stabilized	44	1	4.63596	1.03541	1.01505	2.9233
P68402	PAFAH1B2	Homo sapiens	Platelet-activating factor acetylhydrolase IB subunit beta	0.183333	0.183333	0	1.14666	5.26782e-06	Stabilized	46	1	1.05144	1.09807	0.990765	0.929794
P68402	PAFAH1B2	Homo sapiens	Platelet-activating factor acetylhydrolase IB subunit beta	0.183333	0.183333	0	1.14666	5.26782e-06	Stabilized	48	1	1.04905	1.04901	1.00836	1.05056
P68402	PAFAH1B2	Homo sapiens	Platelet-activating factor acetylhydrolase IB subunit beta	0.183333	0.183333	0	1.14666	5.26782e-06	Stabilized	50	1	1.0131	0.998467	1.04001	1.15154
P68402	PAFAH1B2	Homo sapiens	Platelet-activating factor acetylhydrolase IB subunit beta	0.183333	0.183333	0	1.14666	5.26782e-06	Stabilized	52	1	0.928989	0.844458	0.897178	1.02792
P68402	PAFAH1B2	Homo sapiens	Platelet-activating factor acetylhydrolase IB subunit beta	0.183333	0.183333	0	1.14666	5.26782e-06	Stabilized	54	1	0.951282	0.955865	0.979801	1.22092
P68402	PAFAH1B2	Homo sapiens	Platelet-activating factor acetylhydrolase IB subunit beta	0.183333	0.183333	0	1.14666	5.26782e-06	Stabilized	56	1	0.931948	0.849619	0.900066	0.960902
P68402	PAFAH1B2	Homo sapiens	Platelet-activating factor acetylhydrolase IB subunit beta	0.183333	0.183333	0	1.14666	5.26782e-06	Stabilized	58	1	1.07332	1.09139	1.16174	1.24983
P68402	PAFAH1B2	Homo sapiens	Platelet-activating factor acetylhydrolase IB subunit beta	0.183333	0.183333	0	1.14666	5.26782e-06	Stabilized	60	1	0.796066	0.927228	1.07721	1.21002
P68402	PAFAH1B2	Homo sapiens	Platelet-activating factor acetylhydrolase IB subunit beta	0.183333	0.183333	0	1.14666	5.26782e-06	Stabilized	62	1	1.12002	0.963897	1.32253	1.37218
P68402	PAFAH1B2	Homo sapiens	Platelet-activating factor acetylhydrolase IB subunit beta	0.183333	0.183333	0	1.14666	5.26782e-06	Stabilized	64	1	1.1664	1.15114	1.57313	1.71181
P08758	ANXA5	Homo sapiens	Annexin A5	0.183333	0.183333	0	1.14595	5.26782e-06	Stabilized	42	1	1.48092	0.971747	1.02062	1.34848
P08758	ANXA5	Homo sapiens	Annexin A5	0.183333	0.183333	0	1.14595	5.26782e-06	Stabilized	44	1	1.27088	0.971206	1.04428	1.29054
P08758	ANXA5	Homo sapiens	Annexin A5	0.183333	0.183333	0	1.14595	5.26782e-06	Stabilized	46	1	1.79752	1.15374	1.12977	1.62992
P08758	ANXA5	Homo sapiens	Annexin A5	0.183333	0.183333	0	1.14595	5.26782e-06	Stabilized	48	1	1.6387	1.04463	1.1706	1.35429
P08758	ANXA5	Homo sapiens	Annexin A5	0.183333	0.183333	0	1.14595	5.26782e-06	Stabilized	50	1	1.57675	1.12198	0.998475	1.57089
P08758	ANXA5	Homo sapiens	Annexin A5	0.183333	0.183333	0	1.14595	5.26782e-06	Stabilized	52	1	0.841246	0.697715	0.798995	0.738514
P08758	ANXA5	Homo sapiens	Annexin A5	0.183333	0.183333	0	1.14595	5.26782e-06	Stabilized	54	1	0.985606	0.940065	1.07541	1.07762
P08758	ANXA5	Homo sapiens	Annexin A5	0.183333	0.183333	0	1.14595	5.26782e-06	Stabilized	56	1	0.855701	0.804648	0.817448	0.737151
P08758	ANXA5	Homo sapiens	Annexin A5	0.183333	0.183333	0	1.14595	5.26782e-06	Stabilized	58	1	1.00251	0.887138	1.40213	1.53057
P08758	ANXA5	Homo sapiens	Annexin A5	0.183333	0.183333	0	1.14595	5.26782e-06	Stabilized	60	1	0.901586	0.919811	1.34005	1.43778
P08758	ANXA5	Homo sapiens	Annexin A5	0.183333	0.183333	0	1.14595	5.26782e-06	Stabilized	62	1	1.14314	0.956819	1.89846	2.17845
P08758	ANXA5	Homo sapiens	Annexin A5	0.183333	0.183333	0	1.14595	5.26782e-06	Stabilized	64	1	0.920003	0.848553	1.66448	1.76922
Q13686	ALKBH1	Homo sapiens	Nucleic acid dioxygenase ALKBH1	0.183333	0.183333	0	1.1388	5.26782e-06	Stabilized	42	1	0.892231	1.24241	0.771224	1.32443
Q13686	ALKBH1	Homo sapiens	Nucleic acid dioxygenase ALKBH1	0.183333	0.183333	0	1.1388	5.26782e-06	Stabilized	44	1	1.05241	1.36153	1.01449	1.37917
Q13686	ALKBH1	Homo sapiens	Nucleic acid dioxygenase ALKBH1	0.183333	0.183333	0	1.1388	5.26782e-06	Stabilized	46	1	1.07306	1.43541	1.00264	1.3329
Q13686	ALKBH1	Homo sapiens	Nucleic acid dioxygenase ALKBH1	0.183333	0.183333	0	1.1388	5.26782e-06	Stabilized	48	1	0.967871	1.28868	0.760721	1.58481
Q13686	ALKBH1	Homo sapiens	Nucleic acid dioxygenase ALKBH1	0.183333	0.183333	0	1.1388	5.26782e-06	Stabilized	50	1	1.05819	1.25852	1.07579	1.23582
Q13686	ALKBH1	Homo sapiens	Nucleic acid dioxygenase ALKBH1	0.183333	0.183333	0	1.1388	5.26782e-06	Stabilized	52	NaN	NaN	NaN	NaN	NaN
Q13686	ALKBH1	Homo sapiens	Nucleic acid dioxygenase ALKBH1	0.183333	0.183333	0	1.1388	5.26782e-06	Stabilized	54	1	0.741377	0.772756	0.744421	0.863433
Q13686	ALKBH1	Homo sapiens	Nucleic acid dioxygenase ALKBH1	0.183333	0.183333	0	1.1388	5.26782e-06	Stabilized	56	NaN	NaN	NaN	NaN	NaN
Q13686	ALKBH1	Homo sapiens	Nucleic acid dioxygenase ALKBH1	0.183333	0.183333	0	1.1388	5.26782e-06	Stabilized	58	1	1.16959	0.917832	1.08689	0.868748
Q13686	ALKBH1	Homo sapiens	Nucleic acid dioxygenase ALKBH1	0.183333	0.183333	0	1.1388	5.26782e-06	Stabilized	60	1	1.51505	1.73583	1.96895	2.03578
Q13686	ALKBH1	Homo sapiens	Nucleic acid dioxygenase ALKBH1	0.183333	0.183333	0	1.1388	5.26782e-06	Stabilized	62	1	1.35766	0.972922	1.06661	1.53691
Q13686	ALKBH1	Homo sapiens	Nucleic acid dioxygenase ALKBH1	0.183333	0.183333	0	1.1388	5.26782e-06	Stabilized	64	1	1.3742	0.974926	1.34843	2.16335
P04792	HSPB1	Homo sapiens	Heat shock protein beta-1	0.183333	0.183333	0	1.13077	5.26782e-06	Solubility/Expression	42	1	1.78654	0.990876	1.06183	1.45111
P04792	HSPB1	Homo sapiens	Heat shock protein beta-1	0.183333	0.183333	0	1.13077	5.26782e-06	Solubility/Expression	44	1	1.71283	0.977739	0.949715	1.35197
P04792	HSPB1	Homo sapiens	Heat shock protein beta-1	0.183333	0.183333	0	1.13077	5.26782e-06	Solubility/Expression	46	1	1.33479	0.860296	1.04108	1.28189
P04792	HSPB1	Homo sapiens	Heat shock protein beta-1	0.183333	0.183333	0	1.13077	5.26782e-06	Solubility/Expression	48	1	1.8932	1.00635	1.15002	1.61031
P04792	HSPB1	Homo sapiens	Heat shock protein beta-1	0.183333	0.183333	0	1.13077	5.26782e-06	Solubility/Expression	50	1	1.44946	1.07424	1.12028	1.26078
P04792	HSPB1	Homo sapiens	Heat shock protein beta-1	0.183333	0.183333	0	1.13077	5.26782e-06	Solubility/Expression	52	1	1.3255	1.08163	1.10564	1.07825
P04792	HSPB1	Homo sapiens	Heat shock protein beta-1	0.183333	0.183333	0	1.13077	5.26782e-06	Solubility/Expression	54	1	0.915513	0.935168	0.954242	1.1104
P04792	HSPB1	Homo sapiens	Heat shock protein beta-1	0.183333	0.183333	0	1.13077	5.26782e-06	Solubility/Expression	56	1	0.962911	0.931358	0.89235	0.985672
P04792	HSPB1	Homo sapiens	Heat shock protein beta-1	0.183333	0.183333	0	1.13077	5.26782e-06	Solubility/Expression	58	1	1.02794	1.0167	1.28654	1.38697
P04792	HSPB1	Homo sapiens	Heat shock protein beta-1	0.183333	0.183333	0	1.13077	5.26782e-06	Solubility/Expression	60	1	0.948383	0.976649	1.07345	1.18817
P04792	HSPB1	Homo sapiens	Heat shock protein beta-1	0.183333	0.183333	0	1.13077	5.26782e-06	Solubility/Expression	62	1	1.05423	1.02651	1.43761	1.42903
P04792	HSPB1	Homo sapiens	Heat shock protein beta-1	0.183333	0.183333	0	1.13077	5.26782e-06	Solubility/Expression	64	1	0.896057	1.00633	1.20231	1.24567
Q12765-2	SCRN1	Homo sapiens	Isoform 2 of Secernin-1	0.183333	0.183333	0	1.12965	5.26782e-06	Stabilized	42	1	1.22085	0.957117	1.27469	1.22541
Q12765-2	SCRN1	Homo sapiens	Isoform 2 of Secernin-1	0.183333	0.183333	0	1.12965	5.26782e-06	Stabilized	44	1	1.32607	0.953044	1.19613	1.31987
Q12765-2	SCRN1	Homo sapiens	Isoform 2 of Secernin-1	0.183333	0.183333	0	1.12965	5.26782e-06	Stabilized	46	1	1.87663	1.08546	1.17988	1.47065
Q12765-2	SCRN1	Homo sapiens	Isoform 2 of Secernin-1	0.183333	0.183333	0	1.12965	5.26782e-06	Stabilized	48	1	1.19892	0.922494	1.19321	1.09809
Q12765-2	SCRN1	Homo sapiens	Isoform 2 of Secernin-1	0.183333	0.183333	0	1.12965	5.26782e-06	Stabilized	50	1	1.04372	1.00551	1.07512	1.05758
Q12765-2	SCRN1	Homo sapiens	Isoform 2 of Secernin-1	0.183333	0.183333	0	1.12965	5.26782e-06	Stabilized	52	1	0.931881	0.865757	0.986252	0.907228
Q12765-2	SCRN1	Homo sapiens	Isoform 2 of Secernin-1	0.183333	0.183333	0	1.12965	5.26782e-06	Stabilized	54	1	1.05452	0.856034	1.10444	1.13144
Q12765-2	SCRN1	Homo sapiens	Isoform 2 of Secernin-1	0.183333	0.183333	0	1.12965	5.26782e-06	Stabilized	56	1	0.951333	0.837492	1.14901	1.12387
Q12765-2	SCRN1	Homo sapiens	Isoform 2 of Secernin-1	0.183333	0.183333	0	1.12965	5.26782e-06	Stabilized	58	1	1.1406	0.995733	1.59441	1.78186
Q12765-2	SCRN1	Homo sapiens	Isoform 2 of Secernin-1	0.183333	0.183333	0	1.12965	5.26782e-06	Stabilized	60	1	0.895701	0.796727	1.55975	1.6513
Q12765-2	SCRN1	Homo sapiens	Isoform 2 of Secernin-1	0.183333	0.183333	0	1.12965	5.26782e-06	Stabilized	62	1	1.20869	0.99342	1.36431	1.42101
Q12765-2	SCRN1	Homo sapiens	Isoform 2 of Secernin-1	0.183333	0.183333	0	1.12965	5.26782e-06	Stabilized	64	1	0.954257	0.980178	1.37115	1.49001
P11940	PABPC1	Homo sapiens	Polyadenylate-binding protein 1	0.183333	0.183333	0	1.12963	5.26782e-06	Stabilized	42	1	1.26051	1.0127	1.24187	1.26661
P11940	PABPC1	Homo sapiens	Polyadenylate-binding protein 1	0.183333	0.183333	0	1.12963	5.26782e-06	Stabilized	44	1	1.52308	0.959389	1.27354	1.33862
P11940	PABPC1	Homo sapiens	Polyadenylate-binding protein 1	0.183333	0.183333	0	1.12963	5.26782e-06	Stabilized	46	1	1.14531	0.94025	1.19123	1.21419
P11940	PABPC1	Homo sapiens	Polyadenylate-binding protein 1	0.183333	0.183333	0	1.12963	5.26782e-06	Stabilized	48	1	1.07514	1.16331	1.1346	1.2016
P11940	PABPC1	Homo sapiens	Polyadenylate-binding protein 1	0.183333	0.183333	0	1.12963	5.26782e-06	Stabilized	50	1	0.980104	1.03626	0.993526	1.05239
P11940	PABPC1	Homo sapiens	Polyadenylate-binding protein 1	0.183333	0.183333	0	1.12963	5.26782e-06	Stabilized	52	1	1.14454	1.12552	1.01721	1.0438
P11940	PABPC1	Homo sapiens	Polyadenylate-binding protein 1	0.183333	0.183333	0	1.12963	5.26782e-06	Stabilized	54	1	0.925087	0.90915	0.908932	1.00477
P11940	PABPC1	Homo sapiens	Polyadenylate-binding protein 1	0.183333	0.183333	0	1.12963	5.26782e-06	Stabilized	56	1	0.90668	0.895715	0.932798	1.0792
P11940	PABPC1	Homo sapiens	Polyadenylate-binding protein 1	0.183333	0.183333	0	1.12963	5.26782e-06	Stabilized	58	1	0.976943	0.930914	1.37694	1.52212
P11940	PABPC1	Homo sapiens	Polyadenylate-binding protein 1	0.183333	0.183333	0	1.12963	5.26782e-06	Stabilized	60	1	0.896856	0.851856	1.46355	1.57043
P11940	PABPC1	Homo sapiens	Polyadenylate-binding protein 1	0.183333	0.183333	0	1.12963	5.26782e-06	Stabilized	62	1	1.30982	1.01209	1.44556	1.84515
P11940	PABPC1	Homo sapiens	Polyadenylate-binding protein 1	0.183333	0.183333	0	1.12963	5.26782e-06	Stabilized	64	1	1.14483	0.985683	1.55872	1.98854
P12956	XRCC6	Homo sapiens	X-ray repair cross-complementing protein 6	0.183333	0.183333	0	1.12961	5.26782e-06	Solubility/Expression	42	1	1.94968	1.21021	1.32745	1.69026
P12956	XRCC6	Homo sapiens	X-ray repair cross-complementing protein 6	0.183333	0.183333	0	1.12961	5.26782e-06	Solubility/Expression	44	1	1.75517	0.958991	1.1267	1.37062
P12956	XRCC6	Homo sapiens	X-ray repair cross-complementing protein 6	0.183333	0.183333	0	1.12961	5.26782e-06	Solubility/Expression	46	1	1.38888	0.998334	1.07296	1.24971
P12956	XRCC6	Homo sapiens	X-ray repair cross-complementing protein 6	0.183333	0.183333	0	1.12961	5.26782e-06	Solubility/Expression	48	1	1.06845	1.18836	1.08296	1.09479
P12956	XRCC6	Homo sapiens	X-ray repair cross-complementing protein 6	0.183333	0.183333	0	1.12961	5.26782e-06	Solubility/Expression	50	1	1.02137	1.04477	0.871061	0.863104
P12956	XRCC6	Homo sapiens	X-ray repair cross-complementing protein 6	0.183333	0.183333	0	1.12961	5.26782e-06	Solubility/Expression	52	1	0.896965	0.856144	0.800154	0.71752
P12956	XRCC6	Homo sapiens	X-ray repair cross-complementing protein 6	0.183333	0.183333	0	1.12961	5.26782e-06	Solubility/Expression	54	1	0.947855	0.977721	0.882548	0.930733
P12956	XRCC6	Homo sapiens	X-ray repair cross-complementing protein 6	0.183333	0.183333	0	1.12961	5.26782e-06	Solubility/Expression	56	1	0.861395	0.874564	0.762606	0.726248
P12956	XRCC6	Homo sapiens	X-ray repair cross-complementing protein 6	0.183333	0.183333	0	1.12961	5.26782e-06	Solubility/Expression	58	1	1.08281	0.93705	1.45079	1.56712
P12956	XRCC6	Homo sapiens	X-ray repair cross-complementing protein 6	0.183333	0.183333	0	1.12961	5.26782e-06	Solubility/Expression	60	1	0.7616	0.843095	1.00285	1.13666
P12956	XRCC6	Homo sapiens	X-ray repair cross-complementing protein 6	0.183333	0.183333	0	1.12961	5.26782e-06	Solubility/Expression	62	1	1.23081	1.04329	2.05364	2.49302
P12956	XRCC6	Homo sapiens	X-ray repair cross-complementing protein 6	0.183333	0.183333	0	1.12961	5.26782e-06	Solubility/Expression	64	1	1.0182	0.923686	1.75676	1.90676
H0YJP4	DHRS2	Homo sapiens	Dehydrogenase/reductase SDR family member 2, mitochondrial (Fragment)	0.183333	0.183333	0	1.12253	5.26782e-06	Stabilized	42	1	1.35042	1.20559	1.34078	1.40836
H0YJP4	DHRS2	Homo sapiens	Dehydrogenase/reductase SDR family member 2, mitochondrial (Fragment)	0.183333	0.183333	0	1.12253	5.26782e-06	Stabilized	44	1	1.02255	1.06615	1.11738	1.0071
H0YJP4	DHRS2	Homo sapiens	Dehydrogenase/reductase SDR family member 2, mitochondrial (Fragment)	0.183333	0.183333	0	1.12253	5.26782e-06	Stabilized	46	1	0.990219	1.00674	1.01857	0.968978
H0YJP4	DHRS2	Homo sapiens	Dehydrogenase/reductase SDR family member 2, mitochondrial (Fragment)	0.183333	0.183333	0	1.12253	5.26782e-06	Stabilized	48	1	1.03196	1.05468	1.12787	1.10574
H0YJP4	DHRS2	Homo sapiens	Dehydrogenase/reductase SDR family member 2, mitochondrial (Fragment)	0.183333	0.183333	0	1.12253	5.26782e-06	Stabilized	50	1	1.02668	0.985371	1.15088	0.879969
H0YJP4	DHRS2	Homo sapiens	Dehydrogenase/reductase SDR family member 2, mitochondrial (Fragment)	0.183333	0.183333	0	1.12253	5.26782e-06	Stabilized	52	1	0.973215	1.05041	1.23988	1.12779
H0YJP4	DHRS2	Homo sapiens	Dehydrogenase/reductase SDR family member 2, mitochondrial (Fragment)	0.183333	0.183333	0	1.12253	5.26782e-06	Stabilized	54	1	1.02255	1.08362	1.3217	0.968687
H0YJP4	DHRS2	Homo sapiens	Dehydrogenase/reductase SDR family member 2, mitochondrial (Fragment)	0.183333	0.183333	0	1.12253	5.26782e-06	Stabilized	56	1	0.934371	1.11583	1.09782	0.813367
H0YJP4	DHRS2	Homo sapiens	Dehydrogenase/reductase SDR family member 2, mitochondrial (Fragment)	0.183333	0.183333	0	1.12253	5.26782e-06	Stabilized	58	1	0.920294	0.946862	1.18936	0.940312
H0YJP4	DHRS2	Homo sapiens	Dehydrogenase/reductase SDR family member 2, mitochondrial (Fragment)	0.183333	0.183333	0	1.12253	5.26782e-06	Stabilized	60	1	0.975582	1.11187	1.57397	1.32807
H0YJP4	DHRS2	Homo sapiens	Dehydrogenase/reductase SDR family member 2, mitochondrial (Fragment)	0.183333	0.183333	0	1.12253	5.26782e-06	Stabilized	62	1	1.29569	1.31315	1.58657	1.87815
H0YJP4	DHRS2	Homo sapiens	Dehydrogenase/reductase SDR family member 2, mitochondrial (Fragment)	0.183333	0.183333	0	1.12253	5.26782e-06	Stabilized	64	1	0.990815	0.943239	1.79966	1.94307
Q9Y295	DRG1	Homo sapiens	Developmentally-regulated GTP-binding protein 1	0.183333	0.183333	0	1.11416	5.26782e-06	Stabilized	42	1	1.39347	1.29274	1.34315	1.3161
Q9Y295	DRG1	Homo sapiens	Developmentally-regulated GTP-binding protein 1	0.183333	0.183333	0	1.11416	5.26782e-06	Stabilized	44	1	1.07952	0.92223	1.21909	1.05131
Q9Y295	DRG1	Homo sapiens	Developmentally-regulated GTP-binding protein 1	0.183333	0.183333	0	1.11416	5.26782e-06	Stabilized	46	1	1.06088	1.0593	1.06687	1.02501
Q9Y295	DRG1	Homo sapiens	Developmentally-regulated GTP-binding protein 1	0.183333	0.183333	0	1.11416	5.26782e-06	Stabilized	48	1	1.00514	0.991165	1.01091	1.00536
Q9Y295	DRG1	Homo sapiens	Developmentally-regulated GTP-binding protein 1	0.183333	0.183333	0	1.11416	5.26782e-06	Stabilized	50	1	0.9948	1.00542	1.01317	0.993864
Q9Y295	DRG1	Homo sapiens	Developmentally-regulated GTP-binding protein 1	0.183333	0.183333	0	1.11416	5.26782e-06	Stabilized	52	1	1.05679	1.06932	1.10991	1.10089
Q9Y295	DRG1	Homo sapiens	Developmentally-regulated GTP-binding protein 1	0.183333	0.183333	0	1.11416	5.26782e-06	Stabilized	54	1	1.02067	1.05951	1.03179	1.00757
Q9Y295	DRG1	Homo sapiens	Developmentally-regulated GTP-binding protein 1	0.183333	0.183333	0	1.11416	5.26782e-06	Stabilized	56	1	0.9675	1.01378	0.968995	1.01218
Q9Y295	DRG1	Homo sapiens	Developmentally-regulated GTP-binding protein 1	0.183333	0.183333	0	1.11416	5.26782e-06	Stabilized	58	1	1.18434	1.07703	1.20066	1.18056
Q9Y295	DRG1	Homo sapiens	Developmentally-regulated GTP-binding protein 1	0.183333	0.183333	0	1.11416	5.26782e-06	Stabilized	60	1	0.920252	0.888167	1.4226	1.4608
Q9Y295	DRG1	Homo sapiens	Developmentally-regulated GTP-binding protein 1	0.183333	0.183333	0	1.11416	5.26782e-06	Stabilized	62	1	1.18981	0.988978	1.7492	2.01592
Q9Y295	DRG1	Homo sapiens	Developmentally-regulated GTP-binding protein 1	0.183333	0.183333	0	1.11416	5.26782e-06	Stabilized	64	1	1.13617	0.998425	1.54271	1.62544
P62937	PPIA	Homo sapiens	Peptidyl-prolyl cis-trans isomerase A	0.183333	0.183333	0	1.11266	5.26782e-06	Stabilized	42	1	1.54962	0.904205	0.969321	1.34736
P62937	PPIA	Homo sapiens	Peptidyl-prolyl cis-trans isomerase A	0.183333	0.183333	0	1.11266	5.26782e-06	Stabilized	44	1	1.54109	0.918002	1.10421	1.33012
P62937	PPIA	Homo sapiens	Peptidyl-prolyl cis-trans isomerase A	0.183333	0.183333	0	1.11266	5.26782e-06	Stabilized	46	1	1.67269	0.920517	1.11281	1.46107
P62937	PPIA	Homo sapiens	Peptidyl-prolyl cis-trans isomerase A	0.183333	0.183333	0	1.11266	5.26782e-06	Stabilized	48	1	1.67059	0.989739	1.14421	1.35782
P62937	PPIA	Homo sapiens	Peptidyl-prolyl cis-trans isomerase A	0.183333	0.183333	0	1.11266	5.26782e-06	Stabilized	50	1	1.32308	1.01855	1.07664	1.27106
P62937	PPIA	Homo sapiens	Peptidyl-prolyl cis-trans isomerase A	0.183333	0.183333	0	1.11266	5.26782e-06	Stabilized	52	1	1.06844	0.81444	1.06262	1.04176
P62937	PPIA	Homo sapiens	Peptidyl-prolyl cis-trans isomerase A	0.183333	0.183333	0	1.11266	5.26782e-06	Stabilized	54	1	0.95286	0.883826	1.03311	1.08564
P62937	PPIA	Homo sapiens	Peptidyl-prolyl cis-trans isomerase A	0.183333	0.183333	0	1.11266	5.26782e-06	Stabilized	56	1	0.9809	0.895288	1.06577	1.06399
P62937	PPIA	Homo sapiens	Peptidyl-prolyl cis-trans isomerase A	0.183333	0.183333	0	1.11266	5.26782e-06	Stabilized	58	1	1.02366	0.960073	1.21423	1.29351
P62937	PPIA	Homo sapiens	Peptidyl-prolyl cis-trans isomerase A	0.183333	0.183333	0	1.11266	5.26782e-06	Stabilized	60	1	0.935763	0.980062	1.21137	1.22533
P62937	PPIA	Homo sapiens	Peptidyl-prolyl cis-trans isomerase A	0.183333	0.183333	0	1.11266	5.26782e-06	Stabilized	62	1	1.1141	0.97962	1.43574	1.38418
P62937	PPIA	Homo sapiens	Peptidyl-prolyl cis-trans isomerase A	0.183333	0.183333	0	1.11266	5.26782e-06	Stabilized	64	1	0.99505	0.954763	1.22685	1.194
J3KTL2	SRSF1	Homo sapiens	Serine/arginine-rich-splicing factor 1	0.183333	0.183333	0	1.10979	5.26782e-06	Stabilized	42	1	1.19704	1.16042	1.13747	1.28561
J3KTL2	SRSF1	Homo sapiens	Serine/arginine-rich-splicing factor 1	0.183333	0.183333	0	1.10979	5.26782e-06	Stabilized	44	1	1.28448	1.1977	1.46767	1.35276
J3KTL2	SRSF1	Homo sapiens	Serine/arginine-rich-splicing factor 1	0.183333	0.183333	0	1.10979	5.26782e-06	Stabilized	46	1	1.07286	1.01397	1.26245	1.327
J3KTL2	SRSF1	Homo sapiens	Serine/arginine-rich-splicing factor 1	0.183333	0.183333	0	1.10979	5.26782e-06	Stabilized	48	1	1.13201	1.6107	1.67317	1.88202
J3KTL2	SRSF1	Homo sapiens	Serine/arginine-rich-splicing factor 1	0.183333	0.183333	0	1.10979	5.26782e-06	Stabilized	50	1	0.993315	1.18757	1.19568	1.22894
J3KTL2	SRSF1	Homo sapiens	Serine/arginine-rich-splicing factor 1	0.183333	0.183333	0	1.10979	5.26782e-06	Stabilized	52	1	1.29815	1.35931	1.26531	1.26765
J3KTL2	SRSF1	Homo sapiens	Serine/arginine-rich-splicing factor 1	0.183333	0.183333	0	1.10979	5.26782e-06	Stabilized	54	1	0.746133	0.888398	1.07109	1.16129
J3KTL2	SRSF1	Homo sapiens	Serine/arginine-rich-splicing factor 1	0.183333	0.183333	0	1.10979	5.26782e-06	Stabilized	56	1	1.09292	0.907243	0.925318	1.06842
J3KTL2	SRSF1	Homo sapiens	Serine/arginine-rich-splicing factor 1	0.183333	0.183333	0	1.10979	5.26782e-06	Stabilized	58	1	1.00693	1.06497	1.10987	1.26765
J3KTL2	SRSF1	Homo sapiens	Serine/arginine-rich-splicing factor 1	0.183333	0.183333	0	1.10979	5.26782e-06	Stabilized	60	1	0.951054	0.826061	0.981275	1.23109
J3KTL2	SRSF1	Homo sapiens	Serine/arginine-rich-splicing factor 1	0.183333	0.183333	0	1.10979	5.26782e-06	Stabilized	62	1	1.31419	1.04625	1.21531	1.10831
J3KTL2	SRSF1	Homo sapiens	Serine/arginine-rich-splicing factor 1	0.183333	0.183333	0	1.10979	5.26782e-06	Stabilized	64	1	0.673095	0.741721	0.642146	0.693708
Q9Y570	PPME1	Homo sapiens	Protein phosphatase methylesterase 1	0.183333	0.183333	0	1.10361	5.26782e-06	Stabilized	42	1	1.02346	1.04508	1.00669	1.03564
Q9Y570	PPME1	Homo sapiens	Protein phosphatase methylesterase 1	0.183333	0.183333	0	1.10361	5.26782e-06	Stabilized	44	1	0.995274	0.988915	0.968509	1.01401
Q9Y570	PPME1	Homo sapiens	Protein phosphatase methylesterase 1	0.183333	0.183333	0	1.10361	5.26782e-06	Stabilized	46	1	1.1467	1.03185	1.1441	1.06048
Q9Y570	PPME1	Homo sapiens	Protein phosphatase methylesterase 1	0.183333	0.183333	0	1.10361	5.26782e-06	Stabilized	48	1	0.982544	0.983035	0.958682	0.971157
Q9Y570	PPME1	Homo sapiens	Protein phosphatase methylesterase 1	0.183333	0.183333	0	1.10361	5.26782e-06	Stabilized	50	1	1.03425	1.07275	1.01271	1.06971
Q9Y570	PPME1	Homo sapiens	Protein phosphatase methylesterase 1	0.183333	0.183333	0	1.10361	5.26782e-06	Stabilized	52	1	1.01222	1.04233	0.98821	1.0238
Q9Y570	PPME1	Homo sapiens	Protein phosphatase methylesterase 1	0.183333	0.183333	0	1.10361	5.26782e-06	Stabilized	54	1	1.00804	0.933449	0.893403	0.956411
Q9Y570	PPME1	Homo sapiens	Protein phosphatase methylesterase 1	0.183333	0.183333	0	1.10361	5.26782e-06	Stabilized	56	1	0.939573	0.984107	1.01316	1.04714
Q9Y570	PPME1	Homo sapiens	Protein phosphatase methylesterase 1	0.183333	0.183333	0	1.10361	5.26782e-06	Stabilized	58	1	1.11859	1.02351	1.34371	1.3698
Q9Y570	PPME1	Homo sapiens	Protein phosphatase methylesterase 1	0.183333	0.183333	0	1.10361	5.26782e-06	Stabilized	60	1	0.853317	0.869517	1.39438	1.50393
Q9Y570	PPME1	Homo sapiens	Protein phosphatase methylesterase 1	0.183333	0.183333	0	1.10361	5.26782e-06	Stabilized	62	1	1.27752	0.950206	1.75275	2.11088
Q9Y570	PPME1	Homo sapiens	Protein phosphatase methylesterase 1	0.183333	0.183333	0	1.10361	5.26782e-06	Stabilized	64	1	1.08005	0.962648	1.98873	2.22981
Q9UHD1	CHORDC1	Homo sapiens	Cysteine and histidine-rich domain-containing protein 1	0.183333	0.183333	0	1.10277	5.26782e-06	Stabilized	42	1	1.24235	1.05749	1.22798	1.17896
Q9UHD1	CHORDC1	Homo sapiens	Cysteine and histidine-rich domain-containing protein 1	0.183333	0.183333	0	1.10277	5.26782e-06	Stabilized	44	1	1.01272	0.945168	1.03699	0.973971
Q9UHD1	CHORDC1	Homo sapiens	Cysteine and histidine-rich domain-containing protein 1	0.183333	0.183333	0	1.10277	5.26782e-06	Stabilized	46	1	1.5097	1.01944	1.17479	1.24961
Q9UHD1	CHORDC1	Homo sapiens	Cysteine and histidine-rich domain-containing protein 1	0.183333	0.183333	0	1.10277	5.26782e-06	Stabilized	48	1	1.02791	0.894198	1.09946	0.970033
Q9UHD1	CHORDC1	Homo sapiens	Cysteine and histidine-rich domain-containing protein 1	0.183333	0.183333	0	1.10277	5.26782e-06	Stabilized	50	1	1.07454	1.04079	1.09134	1.04445
Q9UHD1	CHORDC1	Homo sapiens	Cysteine and histidine-rich domain-containing protein 1	0.183333	0.183333	0	1.10277	5.26782e-06	Stabilized	52	1	0.954674	0.94147	1.04211	0.966295
Q9UHD1	CHORDC1	Homo sapiens	Cysteine and histidine-rich domain-containing protein 1	0.183333	0.183333	0	1.10277	5.26782e-06	Stabilized	54	1	0.974288	0.909221	1.02628	1.07137
Q9UHD1	CHORDC1	Homo sapiens	Cysteine and histidine-rich domain-containing protein 1	0.183333	0.183333	0	1.10277	5.26782e-06	Stabilized	56	1	0.930425	1.00239	1.14733	1.2145
Q9UHD1	CHORDC1	Homo sapiens	Cysteine and histidine-rich domain-containing protein 1	0.183333	0.183333	0	1.10277	5.26782e-06	Stabilized	58	1	0.995027	0.956187	1.35472	1.49761
Q9UHD1	CHORDC1	Homo sapiens	Cysteine and histidine-rich domain-containing protein 1	0.183333	0.183333	0	1.10277	5.26782e-06	Stabilized	60	1	1.05325	1.1359	1.33112	1.2636
Q9UHD1	CHORDC1	Homo sapiens	Cysteine and histidine-rich domain-containing protein 1	0.183333	0.183333	0	1.10277	5.26782e-06	Stabilized	62	1	1.00556	0.851902	1.53336	1.67456
Q9UHD1	CHORDC1	Homo sapiens	Cysteine and histidine-rich domain-containing protein 1	0.183333	0.183333	0	1.10277	5.26782e-06	Stabilized	64	1	0.992059	0.975599	1.73026	1.76307
P62495	ETF1	Homo sapiens	Eukaryotic peptide chain release factor subunit 1	0.183333	0.183333	0	1.09108	5.26782e-06	Stabilized	42	1	1.06889	1.04335	1.11987	1.07496
P62495	ETF1	Homo sapiens	Eukaryotic peptide chain release factor subunit 1	0.183333	0.183333	0	1.09108	5.26782e-06	Stabilized	44	1	0.991369	0.988719	1.01103	0.956544
P62495	ETF1	Homo sapiens	Eukaryotic peptide chain release factor subunit 1	0.183333	0.183333	0	1.09108	5.26782e-06	Stabilized	46	1	1.02584	1.01818	1.05547	0.979653
P62495	ETF1	Homo sapiens	Eukaryotic peptide chain release factor subunit 1	0.183333	0.183333	0	1.09108	5.26782e-06	Stabilized	48	1	1.0024	0.987966	1.04973	0.99756
P62495	ETF1	Homo sapiens	Eukaryotic peptide chain release factor subunit 1	0.183333	0.183333	0	1.09108	5.26782e-06	Stabilized	50	1	1.01259	1.02161	1.06509	1.01121
P62495	ETF1	Homo sapiens	Eukaryotic peptide chain release factor subunit 1	0.183333	0.183333	0	1.09108	5.26782e-06	Stabilized	52	1	0.96229	0.924602	1.0297	1.0138
P62495	ETF1	Homo sapiens	Eukaryotic peptide chain release factor subunit 1	0.183333	0.183333	0	1.09108	5.26782e-06	Stabilized	54	1	0.956044	0.794676	1.02742	1.10046
P62495	ETF1	Homo sapiens	Eukaryotic peptide chain release factor subunit 1	0.183333	0.183333	0	1.09108	5.26782e-06	Stabilized	56	1	0.991718	0.855122	1.38876	1.36646
P62495	ETF1	Homo sapiens	Eukaryotic peptide chain release factor subunit 1	0.183333	0.183333	0	1.09108	5.26782e-06	Stabilized	58	1	1.13472	0.916463	1.47002	1.53449
P62495	ETF1	Homo sapiens	Eukaryotic peptide chain release factor subunit 1	0.183333	0.183333	0	1.09108	5.26782e-06	Stabilized	60	1	0.902634	0.822738	1.79847	2.00179
P62495	ETF1	Homo sapiens	Eukaryotic peptide chain release factor subunit 1	0.183333	0.183333	0	1.09108	5.26782e-06	Stabilized	62	1	1.13532	0.791831	1.53856	1.47305
P62495	ETF1	Homo sapiens	Eukaryotic peptide chain release factor subunit 1	0.183333	0.183333	0	1.09108	5.26782e-06	Stabilized	64	1	1.06988	0.790605	1.63657	1.55437
E7ERK9	EIF2B4	Homo sapiens	Translation initiation factor eIF-2B subunit delta	0.183333	0.183333	0	1.0831	5.26782e-06	Stabilized	42	1	1.04785	0.958839	0.992947	0.950616
E7ERK9	EIF2B4	Homo sapiens	Translation initiation factor eIF-2B subunit delta	0.183333	0.183333	0	1.0831	5.26782e-06	Stabilized	44	1	0.929603	0.970065	0.837605	0.778087
E7ERK9	EIF2B4	Homo sapiens	Translation initiation factor eIF-2B subunit delta	0.183333	0.183333	0	1.0831	5.26782e-06	Stabilized	46	1	0.983224	0.945061	0.955782	0.992954
E7ERK9	EIF2B4	Homo sapiens	Translation initiation factor eIF-2B subunit delta	0.183333	0.183333	0	1.0831	5.26782e-06	Stabilized	48	1	0.952477	1.01129	1.16028	1.1697
E7ERK9	EIF2B4	Homo sapiens	Translation initiation factor eIF-2B subunit delta	0.183333	0.183333	0	1.0831	5.26782e-06	Stabilized	50	1	0.972557	0.906481	0.966888	0.880346
E7ERK9	EIF2B4	Homo sapiens	Translation initiation factor eIF-2B subunit delta	0.183333	0.183333	0	1.0831	5.26782e-06	Stabilized	52	1	0.869479	0.799667	1.03151	1.12405
E7ERK9	EIF2B4	Homo sapiens	Translation initiation factor eIF-2B subunit delta	0.183333	0.183333	0	1.0831	5.26782e-06	Stabilized	54	1	0.728637	0.95526	1.24323	1.68724
E7ERK9	EIF2B4	Homo sapiens	Translation initiation factor eIF-2B subunit delta	0.183333	0.183333	0	1.0831	5.26782e-06	Stabilized	56	1	0.766131	1.26529	1.32203	2.1131
E7ERK9	EIF2B4	Homo sapiens	Translation initiation factor eIF-2B subunit delta	0.183333	0.183333	0	1.0831	5.26782e-06	Stabilized	58	1	0.784211	0.913753	1.81363	2.17773
E7ERK9	EIF2B4	Homo sapiens	Translation initiation factor eIF-2B subunit delta	0.183333	0.183333	0	1.0831	5.26782e-06	Stabilized	60	1	1.84918	1.28215	1.05602	1.84076
E7ERK9	EIF2B4	Homo sapiens	Translation initiation factor eIF-2B subunit delta	0.183333	0.183333	0	1.0831	5.26782e-06	Stabilized	62	NaN	NaN	NaN	NaN	NaN
E7ERK9	EIF2B4	Homo sapiens	Translation initiation factor eIF-2B subunit delta	0.183333	0.183333	0	1.0831	5.26782e-06	Stabilized	64	NaN	NaN	NaN	NaN	NaN
P63279	UBE2I	Homo sapiens	SUMO-conjugating enzyme UBC9	0.183333	0.183333	0	1.0819	5.26782e-06	Stabilized	42	1	1.01579	0.989521	1.03089	1.06439
P63279	UBE2I	Homo sapiens	SUMO-conjugating enzyme UBC9	0.183333	0.183333	0	1.0819	5.26782e-06	Stabilized	44	1	1.01173	0.984585	1.04105	1.01702
P63279	UBE2I	Homo sapiens	SUMO-conjugating enzyme UBC9	0.183333	0.183333	0	1.0819	5.26782e-06	Stabilized	46	1	1.06621	1.06364	1.13779	1.11402
P63279	UBE2I	Homo sapiens	SUMO-conjugating enzyme UBC9	0.183333	0.183333	0	1.0819	5.26782e-06	Stabilized	48	1	1.00862	0.97948	1.04091	0.978471
P63279	UBE2I	Homo sapiens	SUMO-conjugating enzyme UBC9	0.183333	0.183333	0	1.0819	5.26782e-06	Stabilized	50	1	1.0676	1.07256	1.12385	1.07488
P63279	UBE2I	Homo sapiens	SUMO-conjugating enzyme UBC9	0.183333	0.183333	0	1.0819	5.26782e-06	Stabilized	52	1	1.00113	1.03402	1.07482	1.04241
P63279	UBE2I	Homo sapiens	SUMO-conjugating enzyme UBC9	0.183333	0.183333	0	1.0819	5.26782e-06	Stabilized	54	1	0.983257	0.975623	1.02665	1.04324
P63279	UBE2I	Homo sapiens	SUMO-conjugating enzyme UBC9	0.183333	0.183333	0	1.0819	5.26782e-06	Stabilized	56	1	0.970706	1.02326	1.1129	1.20352
P63279	UBE2I	Homo sapiens	SUMO-conjugating enzyme UBC9	0.183333	0.183333	0	1.0819	5.26782e-06	Stabilized	58	1	0.965532	0.866516	1.21848	1.27781
P63279	UBE2I	Homo sapiens	SUMO-conjugating enzyme UBC9	0.183333	0.183333	0	1.0819	5.26782e-06	Stabilized	60	1	0.996853	0.999847	1.61659	1.72995
P63279	UBE2I	Homo sapiens	SUMO-conjugating enzyme UBC9	0.183333	0.183333	0	1.0819	5.26782e-06	Stabilized	62	1	0.985205	0.848071	1.36448	1.40434
P63279	UBE2I	Homo sapiens	SUMO-conjugating enzyme UBC9	0.183333	0.183333	0	1.0819	5.26782e-06	Stabilized	64	1	1.00086	0.975542	1.61193	1.67768
B1AK88	CAPZB	Homo sapiens	Capping protein (Actin filament) muscle Z-line, beta, isoform CRA_d	0.183333	0.183333	0	1.07899	5.26782e-06	Stabilized	42	1	1.38189	1.0499	1.39681	1.34682
B1AK88	CAPZB	Homo sapiens	Capping protein (Actin filament) muscle Z-line, beta, isoform CRA_d	0.183333	0.183333	0	1.07899	5.26782e-06	Stabilized	44	1	2.1576	1.07192	1.11393	1.89565
B1AK88	CAPZB	Homo sapiens	Capping protein (Actin filament) muscle Z-line, beta, isoform CRA_d	0.183333	0.183333	0	1.07899	5.26782e-06	Stabilized	46	1	1.28188	1.22064	1.26688	1.24434
B1AK88	CAPZB	Homo sapiens	Capping protein (Actin filament) muscle Z-line, beta, isoform CRA_d	0.183333	0.183333	0	1.07899	5.26782e-06	Stabilized	48	1	1.01698	1.00467	1.07126	1.04932
B1AK88	CAPZB	Homo sapiens	Capping protein (Actin filament) muscle Z-line, beta, isoform CRA_d	0.183333	0.183333	0	1.07899	5.26782e-06	Stabilized	50	1	1.04637	1.02884	1.03971	0.99235
B1AK88	CAPZB	Homo sapiens	Capping protein (Actin filament) muscle Z-line, beta, isoform CRA_d	0.183333	0.183333	0	1.07899	5.26782e-06	Stabilized	52	1	1.06043	1.04358	1.07124	1.06832
B1AK88	CAPZB	Homo sapiens	Capping protein (Actin filament) muscle Z-line, beta, isoform CRA_d	0.183333	0.183333	0	1.07899	5.26782e-06	Stabilized	54	1	0.951769	1.00388	1.01262	1.02383
B1AK88	CAPZB	Homo sapiens	Capping protein (Actin filament) muscle Z-line, beta, isoform CRA_d	0.183333	0.183333	0	1.07899	5.26782e-06	Stabilized	56	1	1.0266	1.03336	1.02003	1.07877
B1AK88	CAPZB	Homo sapiens	Capping protein (Actin filament) muscle Z-line, beta, isoform CRA_d	0.183333	0.183333	0	1.07899	5.26782e-06	Stabilized	58	1	0.960627	1.05904	1.04642	1.02728
B1AK88	CAPZB	Homo sapiens	Capping protein (Actin filament) muscle Z-line, beta, isoform CRA_d	0.183333	0.183333	0	1.07899	5.26782e-06	Stabilized	60	1	1.07165	0.999671	1.03022	1.09436
B1AK88	CAPZB	Homo sapiens	Capping protein (Actin filament) muscle Z-line, beta, isoform CRA_d	0.183333	0.183333	0	1.07899	5.26782e-06	Stabilized	62	1	0.968596	1.06082	0.95007	0.905545
B1AK88	CAPZB	Homo sapiens	Capping protein (Actin filament) muscle Z-line, beta, isoform CRA_d	0.183333	0.183333	0	1.07899	5.26782e-06	Stabilized	64	1	0.812629	0.894222	0.845483	0.940621
Q9Y281	CFL2	Homo sapiens	Cofilin-2	0.183333	0.183333	0	1.07771	5.26782e-06	Stabilized	42	1	1.34859	1.11122	1.29757	1.22254
Q9Y281	CFL2	Homo sapiens	Cofilin-2	0.183333	0.183333	0	1.07771	5.26782e-06	Stabilized	44	1	1.9465	1.08006	1.18698	1.58096
Q9Y281	CFL2	Homo sapiens	Cofilin-2	0.183333	0.183333	0	1.07771	5.26782e-06	Stabilized	46	1	1.54096	1.39207	1.41047	1.4042
Q9Y281	CFL2	Homo sapiens	Cofilin-2	0.183333	0.183333	0	1.07771	5.26782e-06	Stabilized	48	1	1.01244	0.992177	0.972014	0.966496
Q9Y281	CFL2	Homo sapiens	Cofilin-2	0.183333	0.183333	0	1.07771	5.26782e-06	Stabilized	50	1	1.00507	1.02932	1.06746	1.03283
Q9Y281	CFL2	Homo sapiens	Cofilin-2	0.183333	0.183333	0	1.07771	5.26782e-06	Stabilized	52	1	1.04202	1.08558	1.07194	1.03998
Q9Y281	CFL2	Homo sapiens	Cofilin-2	0.183333	0.183333	0	1.07771	5.26782e-06	Stabilized	54	1	0.97999	1.0495	0.964624	0.925905
Q9Y281	CFL2	Homo sapiens	Cofilin-2	0.183333	0.183333	0	1.07771	5.26782e-06	Stabilized	56	1	0.998565	1.04128	0.940276	0.933561
Q9Y281	CFL2	Homo sapiens	Cofilin-2	0.183333	0.183333	0	1.07771	5.26782e-06	Stabilized	58	1	1.08553	1.01948	0.849515	0.850653
Q9Y281	CFL2	Homo sapiens	Cofilin-2	0.183333	0.183333	0	1.07771	5.26782e-06	Stabilized	60	1	0.904369	0.929943	0.971485	1.00965
Q9Y281	CFL2	Homo sapiens	Cofilin-2	0.183333	0.183333	0	1.07771	5.26782e-06	Stabilized	62	1	1.05766	1.00193	1.03863	1.13943
Q9Y281	CFL2	Homo sapiens	Cofilin-2	0.183333	0.183333	0	1.07771	5.26782e-06	Stabilized	64	1	1.01877	0.942217	1.08759	1.08237
Q86SQ9-2	DHDDS	Homo sapiens	Isoform 2 of Dehydrodolichyl diphosphate synthase complex subunit DHDDS	0.183333	0.183333	0	1.07505	5.26782e-06	Stabilized	42	1	1.11341	0.928019	0.969355	0.927108
Q86SQ9-2	DHDDS	Homo sapiens	Isoform 2 of Dehydrodolichyl diphosphate synthase complex subunit DHDDS	0.183333	0.183333	0	1.07505	5.26782e-06	Stabilized	44	1	1.10973	1.06712	1.15833	1.1178
Q86SQ9-2	DHDDS	Homo sapiens	Isoform 2 of Dehydrodolichyl diphosphate synthase complex subunit DHDDS	0.183333	0.183333	0	1.07505	5.26782e-06	Stabilized	46	1	0.917728	0.996295	0.924075	0.862491
Q86SQ9-2	DHDDS	Homo sapiens	Isoform 2 of Dehydrodolichyl diphosphate synthase complex subunit DHDDS	0.183333	0.183333	0	1.07505	5.26782e-06	Stabilized	48	1	0.896727	0.901345	0.949925	1.05211
Q86SQ9-2	DHDDS	Homo sapiens	Isoform 2 of Dehydrodolichyl diphosphate synthase complex subunit DHDDS	0.183333	0.183333	0	1.07505	5.26782e-06	Stabilized	50	1	1.02479	1.0322	1.17736	1.1488
Q86SQ9-2	DHDDS	Homo sapiens	Isoform 2 of Dehydrodolichyl diphosphate synthase complex subunit DHDDS	0.183333	0.183333	0	1.07505	5.26782e-06	Stabilized	52	1	0.880667	0.930675	0.861201	1.10277
Q86SQ9-2	DHDDS	Homo sapiens	Isoform 2 of Dehydrodolichyl diphosphate synthase complex subunit DHDDS	0.183333	0.183333	0	1.07505	5.26782e-06	Stabilized	54	1	1.09945	1.3051	1.14316	1.11951
Q86SQ9-2	DHDDS	Homo sapiens	Isoform 2 of Dehydrodolichyl diphosphate synthase complex subunit DHDDS	0.183333	0.183333	0	1.07505	5.26782e-06	Stabilized	56	1	1.19818	0.984918	0.944472	1.0306
Q86SQ9-2	DHDDS	Homo sapiens	Isoform 2 of Dehydrodolichyl diphosphate synthase complex subunit DHDDS	0.183333	0.183333	0	1.07505	5.26782e-06	Stabilized	58	1	0.97864	1.12801	0.878162	0.811311
Q86SQ9-2	DHDDS	Homo sapiens	Isoform 2 of Dehydrodolichyl diphosphate synthase complex subunit DHDDS	0.183333	0.183333	0	1.07505	5.26782e-06	Stabilized	60	1	1.3013	1.38943	1.76536	1.56255
Q86SQ9-2	DHDDS	Homo sapiens	Isoform 2 of Dehydrodolichyl diphosphate synthase complex subunit DHDDS	0.183333	0.183333	0	1.07505	5.26782e-06	Stabilized	62	1	1.28637	1.33773	1.71262	1.47599
Q86SQ9-2	DHDDS	Homo sapiens	Isoform 2 of Dehydrodolichyl diphosphate synthase complex subunit DHDDS	0.183333	0.183333	0	1.07505	5.26782e-06	Stabilized	64	NaN	NaN	NaN	NaN	NaN
Q9NRX4	PHPT1	Homo sapiens	14 kDa phosphohistidine phosphatase	0.183333	0.183333	0	1.07373	5.26782e-06	Solubility/Expression	42	1	1.80237	1.75379	1.62567	1.69634
Q9NRX4	PHPT1	Homo sapiens	14 kDa phosphohistidine phosphatase	0.183333	0.183333	0	1.07373	5.26782e-06	Solubility/Expression	44	1	1.55858	0.925026	1.36488	1.26562
Q9NRX4	PHPT1	Homo sapiens	14 kDa phosphohistidine phosphatase	0.183333	0.183333	0	1.07373	5.26782e-06	Solubility/Expression	46	1	1.08228	1.21134	0.932373	0.844225
Q9NRX4	PHPT1	Homo sapiens	14 kDa phosphohistidine phosphatase	0.183333	0.183333	0	1.07373	5.26782e-06	Solubility/Expression	48	1	1.00536	1.04369	0.918501	0.928426
Q9NRX4	PHPT1	Homo sapiens	14 kDa phosphohistidine phosphatase	0.183333	0.183333	0	1.07373	5.26782e-06	Solubility/Expression	50	1	0.936878	1.0229	1.03181	0.874529
Q9NRX4	PHPT1	Homo sapiens	14 kDa phosphohistidine phosphatase	0.183333	0.183333	0	1.07373	5.26782e-06	Solubility/Expression	52	1	0.99727	1.17046	1.15634	1.1029
Q9NRX4	PHPT1	Homo sapiens	14 kDa phosphohistidine phosphatase	0.183333	0.183333	0	1.07373	5.26782e-06	Solubility/Expression	54	1	0.973246	1.07091	0.905755	0.775692
Q9NRX4	PHPT1	Homo sapiens	14 kDa phosphohistidine phosphatase	0.183333	0.183333	0	1.07373	5.26782e-06	Solubility/Expression	56	1	1.00503	1.12069	0.970668	0.874063
Q9NRX4	PHPT1	Homo sapiens	14 kDa phosphohistidine phosphatase	0.183333	0.183333	0	1.07373	5.26782e-06	Solubility/Expression	58	1	1.12869	1.06955	0.960301	0.770441
Q9NRX4	PHPT1	Homo sapiens	14 kDa phosphohistidine phosphatase	0.183333	0.183333	0	1.07373	5.26782e-06	Solubility/Expression	60	1	1.0937	1.21489	0.936051	0.969973
Q9NRX4	PHPT1	Homo sapiens	14 kDa phosphohistidine phosphatase	0.183333	0.183333	0	1.07373	5.26782e-06	Solubility/Expression	62	1	1.09347	1.07002	0.966964	1.01622
Q9NRX4	PHPT1	Homo sapiens	14 kDa phosphohistidine phosphatase	0.183333	0.183333	0	1.07373	5.26782e-06	Solubility/Expression	64	1	1.09517	1.11711	0.963607	1.00975
P14625	HSP90B1	Homo sapiens	Endoplasmin	0.183333	0.183333	0	1.06473	5.26782e-06	Stabilized	42	1	1.49809	1.11728	1.18564	1.43195
P14625	HSP90B1	Homo sapiens	Endoplasmin	0.183333	0.183333	0	1.06473	5.26782e-06	Stabilized	44	1	1.35282	1.0342	1.10122	1.17935
P14625	HSP90B1	Homo sapiens	Endoplasmin	0.183333	0.183333	0	1.06473	5.26782e-06	Stabilized	46	1	1.82183	1.12269	1.07048	1.43532
P14625	HSP90B1	Homo sapiens	Endoplasmin	0.183333	0.183333	0	1.06473	5.26782e-06	Stabilized	48	1	1.40329	1.0582	0.993842	1.15289
P14625	HSP90B1	Homo sapiens	Endoplasmin	0.183333	0.183333	0	1.06473	5.26782e-06	Stabilized	50	1	1.07263	1.18398	1.13028	1.15145
P14625	HSP90B1	Homo sapiens	Endoplasmin	0.183333	0.183333	0	1.06473	5.26782e-06	Stabilized	52	1	1.01958	1.08491	1.02525	0.98537
P14625	HSP90B1	Homo sapiens	Endoplasmin	0.183333	0.183333	0	1.06473	5.26782e-06	Stabilized	54	1	1.04581	1.13034	0.966343	0.897014
P14625	HSP90B1	Homo sapiens	Endoplasmin	0.183333	0.183333	0	1.06473	5.26782e-06	Stabilized	56	1	0.876741	1.00767	0.841615	0.821415
P14625	HSP90B1	Homo sapiens	Endoplasmin	0.183333	0.183333	0	1.06473	5.26782e-06	Stabilized	58	1	0.994136	1.08806	0.85116	0.835517
P14625	HSP90B1	Homo sapiens	Endoplasmin	0.183333	0.183333	0	1.06473	5.26782e-06	Stabilized	60	1	0.986142	1.15177	0.79335	0.811229
P14625	HSP90B1	Homo sapiens	Endoplasmin	0.183333	0.183333	0	1.06473	5.26782e-06	Stabilized	62	1	1.1093	1.2928	0.775075	0.83766
P14625	HSP90B1	Homo sapiens	Endoplasmin	0.183333	0.183333	0	1.06473	5.26782e-06	Stabilized	64	1	1.06115	1.40762	0.84195	0.847258
Q9UPY8	MAPRE3	Homo sapiens	Microtubule-associated protein RP/EB family member 3	0.183333	0.183333	0	1.06442	5.26782e-06	Stabilized	42	1	0.925363	0.959079	0.962229	0.946725
Q9UPY8	MAPRE3	Homo sapiens	Microtubule-associated protein RP/EB family member 3	0.183333	0.183333	0	1.06442	5.26782e-06	Stabilized	44	1	0.962839	0.987473	0.968857	0.971415
Q9UPY8	MAPRE3	Homo sapiens	Microtubule-associated protein RP/EB family member 3	0.183333	0.183333	0	1.06442	5.26782e-06	Stabilized	46	1	1.02523	0.998125	1.00484	0.992666
Q9UPY8	MAPRE3	Homo sapiens	Microtubule-associated protein RP/EB family member 3	0.183333	0.183333	0	1.06442	5.26782e-06	Stabilized	48	1	0.969314	0.969948	0.920777	0.935592
Q9UPY8	MAPRE3	Homo sapiens	Microtubule-associated protein RP/EB family member 3	0.183333	0.183333	0	1.06442	5.26782e-06	Stabilized	50	1	0.9974	0.988423	0.953358	0.966911
Q9UPY8	MAPRE3	Homo sapiens	Microtubule-associated protein RP/EB family member 3	0.183333	0.183333	0	1.06442	5.26782e-06	Stabilized	52	1	0.997912	0.818689	0.933538	0.902334
Q9UPY8	MAPRE3	Homo sapiens	Microtubule-associated protein RP/EB family member 3	0.183333	0.183333	0	1.06442	5.26782e-06	Stabilized	54	1	0.977663	0.810671	1.17452	1.06945
Q9UPY8	MAPRE3	Homo sapiens	Microtubule-associated protein RP/EB family member 3	0.183333	0.183333	0	1.06442	5.26782e-06	Stabilized	56	1	0.900448	0.931099	1.1616	1.07818
Q9UPY8	MAPRE3	Homo sapiens	Microtubule-associated protein RP/EB family member 3	0.183333	0.183333	0	1.06442	5.26782e-06	Stabilized	58	1	0.983105	0.932376	1.18085	1.07103
Q9UPY8	MAPRE3	Homo sapiens	Microtubule-associated protein RP/EB family member 3	0.183333	0.183333	0	1.06442	5.26782e-06	Stabilized	60	1	0.90597	0.996376	1.32944	1.37385
Q9UPY8	MAPRE3	Homo sapiens	Microtubule-associated protein RP/EB family member 3	0.183333	0.183333	0	1.06442	5.26782e-06	Stabilized	62	1	0.956367	0.936768	1.83293	1.94096
Q9UPY8	MAPRE3	Homo sapiens	Microtubule-associated protein RP/EB family member 3	0.183333	0.183333	0	1.06442	5.26782e-06	Stabilized	64	1	1.14971	1.09425	2.00842	2.01003
P20700	LMNB1	Homo sapiens	Lamin-B1	0.183333	0.183333	0	1.06436	5.26782e-06	Solubility/Expression	42	1	1.72667	1.70222	1.25111	1.35925
P20700	LMNB1	Homo sapiens	Lamin-B1	0.183333	0.183333	0	1.06436	5.26782e-06	Solubility/Expression	44	1	1.51059	1.28069	1.2674	1.07497
P20700	LMNB1	Homo sapiens	Lamin-B1	0.183333	0.183333	0	1.06436	5.26782e-06	Solubility/Expression	46	1	1.21526	1.23973	1.03582	1.05726
P20700	LMNB1	Homo sapiens	Lamin-B1	0.183333	0.183333	0	1.06436	5.26782e-06	Solubility/Expression	48	1	1.12244	1.44581	0.995161	1.28769
P20700	LMNB1	Homo sapiens	Lamin-B1	0.183333	0.183333	0	1.06436	5.26782e-06	Solubility/Expression	50	1	1.02667	1.18176	0.853892	0.891248
P20700	LMNB1	Homo sapiens	Lamin-B1	0.183333	0.183333	0	1.06436	5.26782e-06	Solubility/Expression	52	1	1.07493	1.08293	0.887102	0.931123
P20700	LMNB1	Homo sapiens	Lamin-B1	0.183333	0.183333	0	1.06436	5.26782e-06	Solubility/Expression	54	1	0.976542	0.986848	0.869145	0.942005
P20700	LMNB1	Homo sapiens	Lamin-B1	0.183333	0.183333	0	1.06436	5.26782e-06	Solubility/Expression	56	1	0.99512	0.997439	0.931861	0.986153
P20700	LMNB1	Homo sapiens	Lamin-B1	0.183333	0.183333	0	1.06436	5.26782e-06	Solubility/Expression	58	1	0.982164	0.910227	0.853881	0.960461
P20700	LMNB1	Homo sapiens	Lamin-B1	0.183333	0.183333	0	1.06436	5.26782e-06	Solubility/Expression	60	1	0.970435	0.962881	0.958771	1.04323
P20700	LMNB1	Homo sapiens	Lamin-B1	0.183333	0.183333	0	1.06436	5.26782e-06	Solubility/Expression	62	1	1.17487	1.0861	0.940726	1.04586
P20700	LMNB1	Homo sapiens	Lamin-B1	0.183333	0.183333	0	1.06436	5.26782e-06	Solubility/Expression	64	1	1.03817	0.920252	0.887248	0.939209
Q9P0I2	EMC3	Homo sapiens	ER membrane protein complex subunit 3	0.183333	0.183333	0	1.0631	5.26782e-06	Stabilized	42	1	1.03319	1.01952	1.05867	0.935697
Q9P0I2	EMC3	Homo sapiens	ER membrane protein complex subunit 3	0.183333	0.183333	0	1.0631	5.26782e-06	Stabilized	44	1	0.962922	1.00954	0.944755	0.942581
Q9P0I2	EMC3	Homo sapiens	ER membrane protein complex subunit 3	0.183333	0.183333	0	1.0631	5.26782e-06	Stabilized	46	1	1.02517	1.03523	1.02763	0.991827
Q9P0I2	EMC3	Homo sapiens	ER membrane protein complex subunit 3	0.183333	0.183333	0	1.0631	5.26782e-06	Stabilized	48	1	0.990936	0.982741	0.997593	0.980515
Q9P0I2	EMC3	Homo sapiens	ER membrane protein complex subunit 3	0.183333	0.183333	0	1.0631	5.26782e-06	Stabilized	50	1	1.01831	1.04135	1.02965	0.969645
Q9P0I2	EMC3	Homo sapiens	ER membrane protein complex subunit 3	0.183333	0.183333	0	1.0631	5.26782e-06	Stabilized	52	1	0.98312	1.04878	1.03027	0.971302
Q9P0I2	EMC3	Homo sapiens	ER membrane protein complex subunit 3	0.183333	0.183333	0	1.0631	5.26782e-06	Stabilized	54	1	0.994436	1.00884	0.928947	0.896515
Q9P0I2	EMC3	Homo sapiens	ER membrane protein complex subunit 3	0.183333	0.183333	0	1.0631	5.26782e-06	Stabilized	56	1	0.888522	1.04903	1.01066	1.07092
Q9P0I2	EMC3	Homo sapiens	ER membrane protein complex subunit 3	0.183333	0.183333	0	1.0631	5.26782e-06	Stabilized	58	1	0.961678	0.893725	1.02227	1.12323
Q9P0I2	EMC3	Homo sapiens	ER membrane protein complex subunit 3	0.183333	0.183333	0	1.0631	5.26782e-06	Stabilized	60	1	0.941125	0.71293	1.60074	1.59124
Q9P0I2	EMC3	Homo sapiens	ER membrane protein complex subunit 3	0.183333	0.183333	0	1.0631	5.26782e-06	Stabilized	62	1	1.36692	1.11203	1.73746	1.90261
Q9P0I2	EMC3	Homo sapiens	ER membrane protein complex subunit 3	0.183333	0.183333	0	1.0631	5.26782e-06	Stabilized	64	1	1.06221	0.926534	1.45249	1.50022
H3BUC1	FBXO22	Homo sapiens	F-box only protein 22 (Fragment)	0.183333	0.183333	0	1.06121	5.26782e-06	Stabilized	42	1	0.902882	0.88782	0.938752	0.970758
H3BUC1	FBXO22	Homo sapiens	F-box only protein 22 (Fragment)	0.183333	0.183333	0	1.06121	5.26782e-06	Stabilized	44	1	0.893233	0.883579	0.881916	0.79222
H3BUC1	FBXO22	Homo sapiens	F-box only protein 22 (Fragment)	0.183333	0.183333	0	1.06121	5.26782e-06	Stabilized	46	1	0.943412	0.951418	0.984856	0.884569
H3BUC1	FBXO22	Homo sapiens	F-box only protein 22 (Fragment)	0.183333	0.183333	0	1.06121	5.26782e-06	Stabilized	48	1	1.07445	1.03973	1.05313	0.993627
H3BUC1	FBXO22	Homo sapiens	F-box only protein 22 (Fragment)	0.183333	0.183333	0	1.06121	5.26782e-06	Stabilized	50	1	0.96767	0.989231	1.09965	0.93419
H3BUC1	FBXO22	Homo sapiens	F-box only protein 22 (Fragment)	0.183333	0.183333	0	1.06121	5.26782e-06	Stabilized	52	1	1.08457	1.03381	0.972711	1.11747
H3BUC1	FBXO22	Homo sapiens	F-box only protein 22 (Fragment)	0.183333	0.183333	0	1.06121	5.26782e-06	Stabilized	54	1	0.997927	1.02674	0.960177	0.793328
H3BUC1	FBXO22	Homo sapiens	F-box only protein 22 (Fragment)	0.183333	0.183333	0	1.06121	5.26782e-06	Stabilized	56	1	0.891426	1.05744	0.963542	1.11067
H3BUC1	FBXO22	Homo sapiens	F-box only protein 22 (Fragment)	0.183333	0.183333	0	1.06121	5.26782e-06	Stabilized	58	1	0.921847	0.872727	1.14306	1.11121
H3BUC1	FBXO22	Homo sapiens	F-box only protein 22 (Fragment)	0.183333	0.183333	0	1.06121	5.26782e-06	Stabilized	60	1	1.07209	0.830837	1.00907	0.981938
H3BUC1	FBXO22	Homo sapiens	F-box only protein 22 (Fragment)	0.183333	0.183333	0	1.06121	5.26782e-06	Stabilized	62	1	1.51766	1.95621	2.44036	2.33935
H3BUC1	FBXO22	Homo sapiens	F-box only protein 22 (Fragment)	0.183333	0.183333	0	1.06121	5.26782e-06	Stabilized	64	1	0.907771	1.14638	1.08179	1.26358
O15145	ARPC3	Homo sapiens	Actin-related protein 2/3 complex subunit 3	0.183333	0.183333	0	1.06031	5.26782e-06	Stabilized	42	1	1.13053	1.14651	1.12994	1.10422
O15145	ARPC3	Homo sapiens	Actin-related protein 2/3 complex subunit 3	0.183333	0.183333	0	1.06031	5.26782e-06	Stabilized	44	1	1.80806	1.64318	1.65767	1.68807
O15145	ARPC3	Homo sapiens	Actin-related protein 2/3 complex subunit 3	0.183333	0.183333	0	1.06031	5.26782e-06	Stabilized	46	1	1.04786	1.3804	0.977337	1.56874
O15145	ARPC3	Homo sapiens	Actin-related protein 2/3 complex subunit 3	0.183333	0.183333	0	1.06031	5.26782e-06	Stabilized	48	1	1.03036	0.980609	0.968295	0.962394
O15145	ARPC3	Homo sapiens	Actin-related protein 2/3 complex subunit 3	0.183333	0.183333	0	1.06031	5.26782e-06	Stabilized	50	1	1.04537	1.0114	1.02287	1.04979
O15145	ARPC3	Homo sapiens	Actin-related protein 2/3 complex subunit 3	0.183333	0.183333	0	1.06031	5.26782e-06	Stabilized	52	1	1.03777	1.03474	1.04021	1.02206
O15145	ARPC3	Homo sapiens	Actin-related protein 2/3 complex subunit 3	0.183333	0.183333	0	1.06031	5.26782e-06	Stabilized	54	1	0.969037	1.06474	0.920785	0.955034
O15145	ARPC3	Homo sapiens	Actin-related protein 2/3 complex subunit 3	0.183333	0.183333	0	1.06031	5.26782e-06	Stabilized	56	1	0.996711	1.02955	0.993956	0.965908
O15145	ARPC3	Homo sapiens	Actin-related protein 2/3 complex subunit 3	0.183333	0.183333	0	1.06031	5.26782e-06	Stabilized	58	1	0.949202	1.06271	0.840215	0.848474
O15145	ARPC3	Homo sapiens	Actin-related protein 2/3 complex subunit 3	0.183333	0.183333	0	1.06031	5.26782e-06	Stabilized	60	1	1.00276	1.08482	0.906613	0.897152
O15145	ARPC3	Homo sapiens	Actin-related protein 2/3 complex subunit 3	0.183333	0.183333	0	1.06031	5.26782e-06	Stabilized	62	1	1.02931	1.13896	0.858487	0.905551
O15145	ARPC3	Homo sapiens	Actin-related protein 2/3 complex subunit 3	0.183333	0.183333	0	1.06031	5.26782e-06	Stabilized	64	1	0.922725	1.09203	0.83531	0.860412
Q01130	SRSF2	Homo sapiens	Serine/arginine-rich splicing factor 2	0.183333	0.183333	0	1.0544	5.26782e-06	Solubility/Expression	42	1	1.61913	1.72191	1.46832	1.59299
Q01130	SRSF2	Homo sapiens	Serine/arginine-rich splicing factor 2	0.183333	0.183333	0	1.0544	5.26782e-06	Solubility/Expression	44	1	1.312	1.29639	1.23574	1.00571
Q01130	SRSF2	Homo sapiens	Serine/arginine-rich splicing factor 2	0.183333	0.183333	0	1.0544	5.26782e-06	Solubility/Expression	46	1	1.09878	1.08924	0.992139	0.95725
Q01130	SRSF2	Homo sapiens	Serine/arginine-rich splicing factor 2	0.183333	0.183333	0	1.0544	5.26782e-06	Solubility/Expression	48	1	1.01245	1.26664	1.09857	1.22455
Q01130	SRSF2	Homo sapiens	Serine/arginine-rich splicing factor 2	0.183333	0.183333	0	1.0544	5.26782e-06	Solubility/Expression	50	1	0.909872	0.993334	0.957532	0.966727
Q01130	SRSF2	Homo sapiens	Serine/arginine-rich splicing factor 2	0.183333	0.183333	0	1.0544	5.26782e-06	Solubility/Expression	52	1	1.11687	1.11801	0.958502	0.946128
Q01130	SRSF2	Homo sapiens	Serine/arginine-rich splicing factor 2	0.183333	0.183333	0	1.0544	5.26782e-06	Solubility/Expression	54	1	0.786588	0.884493	0.832463	0.867187
Q01130	SRSF2	Homo sapiens	Serine/arginine-rich splicing factor 2	0.183333	0.183333	0	1.0544	5.26782e-06	Solubility/Expression	56	1	0.93487	0.758359	0.761593	0.904488
Q01130	SRSF2	Homo sapiens	Serine/arginine-rich splicing factor 2	0.183333	0.183333	0	1.0544	5.26782e-06	Solubility/Expression	58	1	1.0023	1.0851	0.948397	0.87369
Q01130	SRSF2	Homo sapiens	Serine/arginine-rich splicing factor 2	0.183333	0.183333	0	1.0544	5.26782e-06	Solubility/Expression	60	1	1.0817	0.843211	0.711595	1.1105
Q01130	SRSF2	Homo sapiens	Serine/arginine-rich splicing factor 2	0.183333	0.183333	0	1.0544	5.26782e-06	Solubility/Expression	62	1	1.88624	1.26226	1.01262	1.00416
Q01130	SRSF2	Homo sapiens	Serine/arginine-rich splicing factor 2	0.183333	0.183333	0	1.0544	5.26782e-06	Solubility/Expression	64	1	1.1206	0.992802	0.709878	0.930332
P49821	NDUFV1	Homo sapiens	NADH dehydrogenase [ubiquinone] flavoprotein 1, mitochondrial	0.183333	0.183333	0	1.04774	5.26782e-06	Stabilized	42	1	1.00908	0.997728	1.01289	0.822277
P49821	NDUFV1	Homo sapiens	NADH dehydrogenase [ubiquinone] flavoprotein 1, mitochondrial	0.183333	0.183333	0	1.04774	5.26782e-06	Stabilized	44	1	0.976295	1.02491	0.952163	0.889724
P49821	NDUFV1	Homo sapiens	NADH dehydrogenase [ubiquinone] flavoprotein 1, mitochondrial	0.183333	0.183333	0	1.04774	5.26782e-06	Stabilized	46	1	1.01046	1.04204	0.964334	0.970194
P49821	NDUFV1	Homo sapiens	NADH dehydrogenase [ubiquinone] flavoprotein 1, mitochondrial	0.183333	0.183333	0	1.04774	5.26782e-06	Stabilized	48	1	1.03234	1.04562	0.966219	0.977831
P49821	NDUFV1	Homo sapiens	NADH dehydrogenase [ubiquinone] flavoprotein 1, mitochondrial	0.183333	0.183333	0	1.04774	5.26782e-06	Stabilized	50	1	0.964857	1.00369	0.978313	0.999877
P49821	NDUFV1	Homo sapiens	NADH dehydrogenase [ubiquinone] flavoprotein 1, mitochondrial	0.183333	0.183333	0	1.04774	5.26782e-06	Stabilized	52	1	0.996321	1.03501	1.0206	1.01196
P49821	NDUFV1	Homo sapiens	NADH dehydrogenase [ubiquinone] flavoprotein 1, mitochondrial	0.183333	0.183333	0	1.04774	5.26782e-06	Stabilized	54	1	1.00616	0.987255	0.948155	0.967489
P49821	NDUFV1	Homo sapiens	NADH dehydrogenase [ubiquinone] flavoprotein 1, mitochondrial	0.183333	0.183333	0	1.04774	5.26782e-06	Stabilized	56	1	1.01211	1.02968	0.99615	1.05487
P49821	NDUFV1	Homo sapiens	NADH dehydrogenase [ubiquinone] flavoprotein 1, mitochondrial	0.183333	0.183333	0	1.04774	5.26782e-06	Stabilized	58	1	1.12886	0.98729	1.17254	1.17504
P49821	NDUFV1	Homo sapiens	NADH dehydrogenase [ubiquinone] flavoprotein 1, mitochondrial	0.183333	0.183333	0	1.04774	5.26782e-06	Stabilized	60	1	1.00007	0.935526	1.1278	1.22037
P49821	NDUFV1	Homo sapiens	NADH dehydrogenase [ubiquinone] flavoprotein 1, mitochondrial	0.183333	0.183333	0	1.04774	5.26782e-06	Stabilized	62	1	1.20157	1.06925	1.29592	1.33915
P49821	NDUFV1	Homo sapiens	NADH dehydrogenase [ubiquinone] flavoprotein 1, mitochondrial	0.183333	0.183333	0	1.04774	5.26782e-06	Stabilized	64	1	1.21285	1.0476	1.58918	1.65465
A0A0A0MTH3	ILK	Homo sapiens	Integrin-linked protein kinase	0.183333	0.183333	0	1.04462	5.26782e-06	Stabilized	42	1	1.12092	1.13294	1.13393	1.13627
A0A0A0MTH3	ILK	Homo sapiens	Integrin-linked protein kinase	0.183333	0.183333	0	1.04462	5.26782e-06	Stabilized	44	1	0.982594	0.977394	0.976633	0.94767
A0A0A0MTH3	ILK	Homo sapiens	Integrin-linked protein kinase	0.183333	0.183333	0	1.04462	5.26782e-06	Stabilized	46	1	0.983	1.01219	0.999378	0.966763
A0A0A0MTH3	ILK	Homo sapiens	Integrin-linked protein kinase	0.183333	0.183333	0	1.04462	5.26782e-06	Stabilized	48	1	0.974635	1.00552	0.986093	0.989211
A0A0A0MTH3	ILK	Homo sapiens	Integrin-linked protein kinase	0.183333	0.183333	0	1.04462	5.26782e-06	Stabilized	50	1	0.945584	0.959047	0.94033	0.927782
A0A0A0MTH3	ILK	Homo sapiens	Integrin-linked protein kinase	0.183333	0.183333	0	1.04462	5.26782e-06	Stabilized	52	1	0.875475	0.789655	0.980672	0.980077
A0A0A0MTH3	ILK	Homo sapiens	Integrin-linked protein kinase	0.183333	0.183333	0	1.04462	5.26782e-06	Stabilized	54	1	0.969508	0.784629	1.07873	1.0962
A0A0A0MTH3	ILK	Homo sapiens	Integrin-linked protein kinase	0.183333	0.183333	0	1.04462	5.26782e-06	Stabilized	56	1	0.982323	0.890079	1.10825	0.991622
A0A0A0MTH3	ILK	Homo sapiens	Integrin-linked protein kinase	0.183333	0.183333	0	1.04462	5.26782e-06	Stabilized	58	1	0.966166	0.763549	1.33408	1.43299
A0A0A0MTH3	ILK	Homo sapiens	Integrin-linked protein kinase	0.183333	0.183333	0	1.04462	5.26782e-06	Stabilized	60	1	1.07923	0.894328	1.64709	1.7892
A0A0A0MTH3	ILK	Homo sapiens	Integrin-linked protein kinase	0.183333	0.183333	0	1.04462	5.26782e-06	Stabilized	62	1	1.10275	1.01766	1.3172	1.36178
A0A0A0MTH3	ILK	Homo sapiens	Integrin-linked protein kinase	0.183333	0.183333	0	1.04462	5.26782e-06	Stabilized	64	1	1.06421	0.937149	1.16295	1.18184
Q13347	EIF3I	Homo sapiens	Eukaryotic translation initiation factor 3 subunit I	0.183333	0.183333	0	1.04269	5.26782e-06	Stabilized	42	1	1.24244	1.163	1.23766	1.18982
Q13347	EIF3I	Homo sapiens	Eukaryotic translation initiation factor 3 subunit I	0.183333	0.183333	0	1.04269	5.26782e-06	Stabilized	44	1	1.08848	1.01011	1.13757	1.06149
Q13347	EIF3I	Homo sapiens	Eukaryotic translation initiation factor 3 subunit I	0.183333	0.183333	0	1.04269	5.26782e-06	Stabilized	46	1	0.953691	0.93514	0.968396	0.977024
Q13347	EIF3I	Homo sapiens	Eukaryotic translation initiation factor 3 subunit I	0.183333	0.183333	0	1.04269	5.26782e-06	Stabilized	48	1	0.95187	1.00923	1.07874	1.08479
Q13347	EIF3I	Homo sapiens	Eukaryotic translation initiation factor 3 subunit I	0.183333	0.183333	0	1.04269	5.26782e-06	Stabilized	50	1	0.89943	0.834595	0.812484	0.836325
Q13347	EIF3I	Homo sapiens	Eukaryotic translation initiation factor 3 subunit I	0.183333	0.183333	0	1.04269	5.26782e-06	Stabilized	52	1	0.887165	0.751022	0.836405	0.809137
Q13347	EIF3I	Homo sapiens	Eukaryotic translation initiation factor 3 subunit I	0.183333	0.183333	0	1.04269	5.26782e-06	Stabilized	54	1	1.00568	0.915956	1.03535	1.02917
Q13347	EIF3I	Homo sapiens	Eukaryotic translation initiation factor 3 subunit I	0.183333	0.183333	0	1.04269	5.26782e-06	Stabilized	56	1	0.9386	0.727686	0.939474	1.03504
Q13347	EIF3I	Homo sapiens	Eukaryotic translation initiation factor 3 subunit I	0.183333	0.183333	0	1.04269	5.26782e-06	Stabilized	58	1	0.932406	0.892588	1.12355	1.14422
Q13347	EIF3I	Homo sapiens	Eukaryotic translation initiation factor 3 subunit I	0.183333	0.183333	0	1.04269	5.26782e-06	Stabilized	60	1	0.889328	0.940276	1.35027	1.36292
Q13347	EIF3I	Homo sapiens	Eukaryotic translation initiation factor 3 subunit I	0.183333	0.183333	0	1.04269	5.26782e-06	Stabilized	62	1	1.12487	1.05939	1.50987	1.75471
Q13347	EIF3I	Homo sapiens	Eukaryotic translation initiation factor 3 subunit I	0.183333	0.183333	0	1.04269	5.26782e-06	Stabilized	64	1	0.925119	1.01493	1.47696	1.67679
O75792	RNASEH2A	Homo sapiens	Ribonuclease H2 subunit A	0.183333	0.183333	0	1.03998	5.26782e-06	Stabilized	42	1	0.952388	0.97773	0.945012	0.982042
O75792	RNASEH2A	Homo sapiens	Ribonuclease H2 subunit A	0.183333	0.183333	0	1.03998	5.26782e-06	Stabilized	44	1	0.967932	1.00175	0.946974	1.02302
O75792	RNASEH2A	Homo sapiens	Ribonuclease H2 subunit A	0.183333	0.183333	0	1.03998	5.26782e-06	Stabilized	46	1	0.962408	0.919896	0.941284	0.915345
O75792	RNASEH2A	Homo sapiens	Ribonuclease H2 subunit A	0.183333	0.183333	0	1.03998	5.26782e-06	Stabilized	48	1	1.01284	0.981016	0.982556	1.0574
O75792	RNASEH2A	Homo sapiens	Ribonuclease H2 subunit A	0.183333	0.183333	0	1.03998	5.26782e-06	Stabilized	50	1	0.929664	1.01517	0.959595	1.06984
O75792	RNASEH2A	Homo sapiens	Ribonuclease H2 subunit A	0.183333	0.183333	0	1.03998	5.26782e-06	Stabilized	52	1	1.01643	0.969009	1.02485	1.0144
O75792	RNASEH2A	Homo sapiens	Ribonuclease H2 subunit A	0.183333	0.183333	0	1.03998	5.26782e-06	Stabilized	54	1	1.11559	1.00015	1.1285	1.12247
O75792	RNASEH2A	Homo sapiens	Ribonuclease H2 subunit A	0.183333	0.183333	0	1.03998	5.26782e-06	Stabilized	56	1	0.994981	0.970336	1.03701	1.05326
O75792	RNASEH2A	Homo sapiens	Ribonuclease H2 subunit A	0.183333	0.183333	0	1.03998	5.26782e-06	Stabilized	58	1	0.804299	0.883651	1.22405	1.51966
O75792	RNASEH2A	Homo sapiens	Ribonuclease H2 subunit A	0.183333	0.183333	0	1.03998	5.26782e-06	Stabilized	60	1	0.861648	0.804318	1.29431	1.69365
O75792	RNASEH2A	Homo sapiens	Ribonuclease H2 subunit A	0.183333	0.183333	0	1.03998	5.26782e-06	Stabilized	62	1	1.23697	1.01803	1.27056	1.45963
O75792	RNASEH2A	Homo sapiens	Ribonuclease H2 subunit A	0.183333	0.183333	0	1.03998	5.26782e-06	Stabilized	64	1	1.03622	1.13237	1.11176	1.05665
Q9UNM6	PSMD13	Homo sapiens	26S proteasome non-ATPase regulatory subunit 13	0.183333	0.183333	0	1.03525	5.26782e-06	Stabilized	42	1	1.0229	1.07078	1.0741	1.0445
Q9UNM6	PSMD13	Homo sapiens	26S proteasome non-ATPase regulatory subunit 13	0.183333	0.183333	0	1.03525	5.26782e-06	Stabilized	44	1	1.03476	1.04438	1.02297	1.02594
Q9UNM6	PSMD13	Homo sapiens	26S proteasome non-ATPase regulatory subunit 13	0.183333	0.183333	0	1.03525	5.26782e-06	Stabilized	46	1	1.01391	0.981908	1.00224	0.998082
Q9UNM6	PSMD13	Homo sapiens	26S proteasome non-ATPase regulatory subunit 13	0.183333	0.183333	0	1.03525	5.26782e-06	Stabilized	48	1	0.971589	1.03874	0.954667	0.978759
Q9UNM6	PSMD13	Homo sapiens	26S proteasome non-ATPase regulatory subunit 13	0.183333	0.183333	0	1.03525	5.26782e-06	Stabilized	50	1	0.989985	0.939543	0.931254	0.990886
Q9UNM6	PSMD13	Homo sapiens	26S proteasome non-ATPase regulatory subunit 13	0.183333	0.183333	0	1.03525	5.26782e-06	Stabilized	52	1	0.959131	0.936706	0.947607	1.00589
Q9UNM6	PSMD13	Homo sapiens	26S proteasome non-ATPase regulatory subunit 13	0.183333	0.183333	0	1.03525	5.26782e-06	Stabilized	54	1	0.985918	1.00199	1.05853	1.01584
Q9UNM6	PSMD13	Homo sapiens	26S proteasome non-ATPase regulatory subunit 13	0.183333	0.183333	0	1.03525	5.26782e-06	Stabilized	56	1	0.895713	0.962351	1.0441	1.09566
Q9UNM6	PSMD13	Homo sapiens	26S proteasome non-ATPase regulatory subunit 13	0.183333	0.183333	0	1.03525	5.26782e-06	Stabilized	58	1	1.03622	0.981742	1.22185	1.25528
Q9UNM6	PSMD13	Homo sapiens	26S proteasome non-ATPase regulatory subunit 13	0.183333	0.183333	0	1.03525	5.26782e-06	Stabilized	60	1	0.768139	0.797983	0.994701	1.29828
Q9UNM6	PSMD13	Homo sapiens	26S proteasome non-ATPase regulatory subunit 13	0.183333	0.183333	0	1.03525	5.26782e-06	Stabilized	62	1	1.12096	0.852004	1.34813	1.31744
Q9UNM6	PSMD13	Homo sapiens	26S proteasome non-ATPase regulatory subunit 13	0.183333	0.183333	0	1.03525	5.26782e-06	Stabilized	64	1	0.958423	0.890092	1.63839	1.59419
Q9Y2H6	FNDC3A	Homo sapiens	Fibronectin type-III domain-containing protein 3A	0.183333	0.183333	0	1.03458	5.26782e-06	Stabilized	42	1	0.995997	0.923389	0.959856	0.828447
Q9Y2H6	FNDC3A	Homo sapiens	Fibronectin type-III domain-containing protein 3A	0.183333	0.183333	0	1.03458	5.26782e-06	Stabilized	44	1	0.957897	0.936403	0.973795	0.971753
Q9Y2H6	FNDC3A	Homo sapiens	Fibronectin type-III domain-containing protein 3A	0.183333	0.183333	0	1.03458	5.26782e-06	Stabilized	46	1	0.919641	0.920551	1.00335	0.951293
Q9Y2H6	FNDC3A	Homo sapiens	Fibronectin type-III domain-containing protein 3A	0.183333	0.183333	0	1.03458	5.26782e-06	Stabilized	48	1	0.93506	0.91899	0.977162	1.12035
Q9Y2H6	FNDC3A	Homo sapiens	Fibronectin type-III domain-containing protein 3A	0.183333	0.183333	0	1.03458	5.26782e-06	Stabilized	50	NaN	NaN	NaN	NaN	NaN
Q9Y2H6	FNDC3A	Homo sapiens	Fibronectin type-III domain-containing protein 3A	0.183333	0.183333	0	1.03458	5.26782e-06	Stabilized	52	NaN	NaN	NaN	NaN	NaN
Q9Y2H6	FNDC3A	Homo sapiens	Fibronectin type-III domain-containing protein 3A	0.183333	0.183333	0	1.03458	5.26782e-06	Stabilized	54	NaN	NaN	NaN	NaN	NaN
Q9Y2H6	FNDC3A	Homo sapiens	Fibronectin type-III domain-containing protein 3A	0.183333	0.183333	0	1.03458	5.26782e-06	Stabilized	56	NaN	NaN	NaN	NaN	NaN
Q9Y2H6	FNDC3A	Homo sapiens	Fibronectin type-III domain-containing protein 3A	0.183333	0.183333	0	1.03458	5.26782e-06	Stabilized	58	1	0.844982	0.945687	1.02723	1.08018
Q9Y2H6	FNDC3A	Homo sapiens	Fibronectin type-III domain-containing protein 3A	0.183333	0.183333	0	1.03458	5.26782e-06	Stabilized	60	1	1.31515	0.730217	1.13928	0.726162
Q9Y2H6	FNDC3A	Homo sapiens	Fibronectin type-III domain-containing protein 3A	0.183333	0.183333	0	1.03458	5.26782e-06	Stabilized	62	1	1.29012	1.3821	2.10331	2.08036
Q9Y2H6	FNDC3A	Homo sapiens	Fibronectin type-III domain-containing protein 3A	0.183333	0.183333	0	1.03458	5.26782e-06	Stabilized	64	1	1.01605	0.930566	1.06356	1.10578
Q9H3P7	ACBD3	Homo sapiens	Golgi resident protein GCP60	0.183333	0.183333	0	1.02018	5.26782e-06	Stabilized	42	1	1.05813	0.985757	1.02394	1.02993
Q9H3P7	ACBD3	Homo sapiens	Golgi resident protein GCP60	0.183333	0.183333	0	1.02018	5.26782e-06	Stabilized	44	1	0.996561	0.999146	0.964495	0.955317
Q9H3P7	ACBD3	Homo sapiens	Golgi resident protein GCP60	0.183333	0.183333	0	1.02018	5.26782e-06	Stabilized	46	1	1.02629	1.01965	1.02651	0.98181
Q9H3P7	ACBD3	Homo sapiens	Golgi resident protein GCP60	0.183333	0.183333	0	1.02018	5.26782e-06	Stabilized	48	1	1.00249	0.985326	1.01961	0.99142
Q9H3P7	ACBD3	Homo sapiens	Golgi resident protein GCP60	0.183333	0.183333	0	1.02018	5.26782e-06	Stabilized	50	1	0.989629	0.971258	1.03987	1.00861
Q9H3P7	ACBD3	Homo sapiens	Golgi resident protein GCP60	0.183333	0.183333	0	1.02018	5.26782e-06	Stabilized	52	1	0.813923	0.724027	0.913435	0.937819
Q9H3P7	ACBD3	Homo sapiens	Golgi resident protein GCP60	0.183333	0.183333	0	1.02018	5.26782e-06	Stabilized	54	1	0.840456	0.811815	1.02232	1.01372
Q9H3P7	ACBD3	Homo sapiens	Golgi resident protein GCP60	0.183333	0.183333	0	1.02018	5.26782e-06	Stabilized	56	1	0.828429	0.733457	0.805776	0.806071
Q9H3P7	ACBD3	Homo sapiens	Golgi resident protein GCP60	0.183333	0.183333	0	1.02018	5.26782e-06	Stabilized	58	1	0.906136	0.805276	1.21844	1.26001
Q9H3P7	ACBD3	Homo sapiens	Golgi resident protein GCP60	0.183333	0.183333	0	1.02018	5.26782e-06	Stabilized	60	1	1.02547	1.05933	1.20647	1.25139
Q9H3P7	ACBD3	Homo sapiens	Golgi resident protein GCP60	0.183333	0.183333	0	1.02018	5.26782e-06	Stabilized	62	1	1.05801	1.01789	1.22778	1.32898
Q9H3P7	ACBD3	Homo sapiens	Golgi resident protein GCP60	0.183333	0.183333	0	1.02018	5.26782e-06	Stabilized	64	1	1.20552	1.0776	1.54999	1.68527
Q6PD74	AAGAB	Homo sapiens	Alpha- and gamma-adaptin-binding protein p34	0.183333	0.183333	0	1.00778	5.26782e-06	Stabilized	42	1	0.92402	0.940651	0.917202	0.936143
Q6PD74	AAGAB	Homo sapiens	Alpha- and gamma-adaptin-binding protein p34	0.183333	0.183333	0	1.00778	5.26782e-06	Stabilized	44	1	0.994606	0.989445	0.940765	0.984893
Q6PD74	AAGAB	Homo sapiens	Alpha- and gamma-adaptin-binding protein p34	0.183333	0.183333	0	1.00778	5.26782e-06	Stabilized	46	1	0.970205	0.972822	0.984598	0.983142
Q6PD74	AAGAB	Homo sapiens	Alpha- and gamma-adaptin-binding protein p34	0.183333	0.183333	0	1.00778	5.26782e-06	Stabilized	48	1	0.953033	0.957897	0.981767	0.971735
Q6PD74	AAGAB	Homo sapiens	Alpha- and gamma-adaptin-binding protein p34	0.183333	0.183333	0	1.00778	5.26782e-06	Stabilized	50	1	0.931266	0.825034	0.918614	0.908744
Q6PD74	AAGAB	Homo sapiens	Alpha- and gamma-adaptin-binding protein p34	0.183333	0.183333	0	1.00778	5.26782e-06	Stabilized	52	1	0.792982	0.685749	0.836601	0.790029
Q6PD74	AAGAB	Homo sapiens	Alpha- and gamma-adaptin-binding protein p34	0.183333	0.183333	0	1.00778	5.26782e-06	Stabilized	54	1	0.996489	0.894065	1.2673	1.31159
Q6PD74	AAGAB	Homo sapiens	Alpha- and gamma-adaptin-binding protein p34	0.183333	0.183333	0	1.00778	5.26782e-06	Stabilized	56	1	0.997819	0.776428	0.797309	0.685795
Q6PD74	AAGAB	Homo sapiens	Alpha- and gamma-adaptin-binding protein p34	0.183333	0.183333	0	1.00778	5.26782e-06	Stabilized	58	1	0.977294	0.807977	1.15143	1.14709
Q6PD74	AAGAB	Homo sapiens	Alpha- and gamma-adaptin-binding protein p34	0.183333	0.183333	0	1.00778	5.26782e-06	Stabilized	60	1	1.04574	1.01087	1.22195	1.34272
Q6PD74	AAGAB	Homo sapiens	Alpha- and gamma-adaptin-binding protein p34	0.183333	0.183333	0	1.00778	5.26782e-06	Stabilized	62	1	1.16984	1.02517	1.51207	1.85136
Q6PD74	AAGAB	Homo sapiens	Alpha- and gamma-adaptin-binding protein p34	0.183333	0.183333	0	1.00778	5.26782e-06	Stabilized	64	1	1.01269	1.06013	1.11946	1.19243
P06748	NPM1	Homo sapiens	Nucleophosmin	0.183333	0.183333	0	0.994891	5.26782e-06	Stabilized	42	1	1.07591	0.987213	1.27983	1.2251
P06748	NPM1	Homo sapiens	Nucleophosmin	0.183333	0.183333	0	0.994891	5.26782e-06	Stabilized	44	1	0.866756	1.04665	1.08734	2.06532
P06748	NPM1	Homo sapiens	Nucleophosmin	0.183333	0.183333	0	0.994891	5.26782e-06	Stabilized	46	1	0.891637	1.26174	1.70045	1.84821
P06748	NPM1	Homo sapiens	Nucleophosmin	0.183333	0.183333	0	0.994891	5.26782e-06	Stabilized	48	1	0.839905	0.965977	1.28779	1.20909
P06748	NPM1	Homo sapiens	Nucleophosmin	0.183333	0.183333	0	0.994891	5.26782e-06	Stabilized	50	1	0.876902	0.853925	1.01548	1.14118
P06748	NPM1	Homo sapiens	Nucleophosmin	0.183333	0.183333	0	0.994891	5.26782e-06	Stabilized	52	1	0.800389	0.786007	0.880679	0.947767
P06748	NPM1	Homo sapiens	Nucleophosmin	0.183333	0.183333	0	0.994891	5.26782e-06	Stabilized	54	1	0.813091	1.06278	0.721282	0.864338
P06748	NPM1	Homo sapiens	Nucleophosmin	0.183333	0.183333	0	0.994891	5.26782e-06	Stabilized	56	1	0.843903	0.779826	0.732002	0.971116
P06748	NPM1	Homo sapiens	Nucleophosmin	0.183333	0.183333	0	0.994891	5.26782e-06	Stabilized	58	1	0.904723	0.921297	0.787918	0.886859
P06748	NPM1	Homo sapiens	Nucleophosmin	0.183333	0.183333	0	0.994891	5.26782e-06	Stabilized	60	1	0.822644	0.987049	0.684964	0.886296
P06748	NPM1	Homo sapiens	Nucleophosmin	0.183333	0.183333	0	0.994891	5.26782e-06	Stabilized	62	1	0.97466	1.00472	0.861862	0.840348
P06748	NPM1	Homo sapiens	Nucleophosmin	0.183333	0.183333	0	0.994891	5.26782e-06	Stabilized	64	1	0.875649	1.01516	0.753717	0.756018
A0A087X298	LRRC6	Homo sapiens	Protein tilB homolog	0.166667	0.2	0.0333333	1.55649	3.47275e-05	Solubility/Expression	42	1	5.11046	2.92628	6.6387	4.95967
A0A087X298	LRRC6	Homo sapiens	Protein tilB homolog	0.166667	0.2	0.0333333	1.55649	3.47275e-05	Solubility/Expression	44	NaN	NaN	NaN	NaN	NaN
A0A087X298	LRRC6	Homo sapiens	Protein tilB homolog	0.166667	0.2	0.0333333	1.55649	3.47275e-05	Solubility/Expression	46	1	0.981356	1.56042	1.11126	0.615672
A0A087X298	LRRC6	Homo sapiens	Protein tilB homolog	0.166667	0.2	0.0333333	1.55649	3.47275e-05	Solubility/Expression	48	1	1.05671	0.945832	1.40304	1.12437
A0A087X298	LRRC6	Homo sapiens	Protein tilB homolog	0.166667	0.2	0.0333333	1.55649	3.47275e-05	Solubility/Expression	50	NaN	NaN	NaN	NaN	NaN
A0A087X298	LRRC6	Homo sapiens	Protein tilB homolog	0.166667	0.2	0.0333333	1.55649	3.47275e-05	Solubility/Expression	52	1	1.39776	2.19682	3.4347	1.41569
A0A087X298	LRRC6	Homo sapiens	Protein tilB homolog	0.166667	0.2	0.0333333	1.55649	3.47275e-05	Solubility/Expression	54	NaN	NaN	NaN	NaN	NaN
A0A087X298	LRRC6	Homo sapiens	Protein tilB homolog	0.166667	0.2	0.0333333	1.55649	3.47275e-05	Solubility/Expression	56	1	0.838427	1.92917	1.1429	0.388215
A0A087X298	LRRC6	Homo sapiens	Protein tilB homolog	0.166667	0.2	0.0333333	1.55649	3.47275e-05	Solubility/Expression	58	1	1.90998	1.95109	2.1241	0.388281
A0A087X298	LRRC6	Homo sapiens	Protein tilB homolog	0.166667	0.2	0.0333333	1.55649	3.47275e-05	Solubility/Expression	60	1	4.77228	3.31632	1.44803	1.08403
A0A087X298	LRRC6	Homo sapiens	Protein tilB homolog	0.166667	0.2	0.0333333	1.55649	3.47275e-05	Solubility/Expression	62	1	2.76728	3.09996	0.26422	1.08625
A0A087X298	LRRC6	Homo sapiens	Protein tilB homolog	0.166667	0.2	0.0333333	1.55649	3.47275e-05	Solubility/Expression	64	NaN	NaN	NaN	NaN	NaN
P62937-2	PPIA	Homo sapiens	Isoform 2 of Peptidyl-prolyl cis-trans isomerase A	0.166667	0.183333	0.0166667	1.58855	3.47275e-05	Solubility/Expression	42	1	2.04507	NaN	0.350013	2.27138
P62937-2	PPIA	Homo sapiens	Isoform 2 of Peptidyl-prolyl cis-trans isomerase A	0.166667	0.183333	0.0166667	1.58855	3.47275e-05	Solubility/Expression	44	1	1.81669	1.49272	1.49933	1.374
P62937-2	PPIA	Homo sapiens	Isoform 2 of Peptidyl-prolyl cis-trans isomerase A	0.166667	0.183333	0.0166667	1.58855	3.47275e-05	Solubility/Expression	46	1	17.4038	0.782985	2.72098	9.43753
P62937-2	PPIA	Homo sapiens	Isoform 2 of Peptidyl-prolyl cis-trans isomerase A	0.166667	0.183333	0.0166667	1.58855	3.47275e-05	Solubility/Expression	48	1	2.30562	1.79923	1.62829	1.61368
P62937-2	PPIA	Homo sapiens	Isoform 2 of Peptidyl-prolyl cis-trans isomerase A	0.166667	0.183333	0.0166667	1.58855	3.47275e-05	Solubility/Expression	50	1	1.0786	1.05158	1.07016	1.05153
P62937-2	PPIA	Homo sapiens	Isoform 2 of Peptidyl-prolyl cis-trans isomerase A	0.166667	0.183333	0.0166667	1.58855	3.47275e-05	Solubility/Expression	52	1	0.911234	0.901351	0.928796	0.913073
P62937-2	PPIA	Homo sapiens	Isoform 2 of Peptidyl-prolyl cis-trans isomerase A	0.166667	0.183333	0.0166667	1.58855	3.47275e-05	Solubility/Expression	54	1	0.944467	0.903488	0.966824	0.93719
P62937-2	PPIA	Homo sapiens	Isoform 2 of Peptidyl-prolyl cis-trans isomerase A	0.166667	0.183333	0.0166667	1.58855	3.47275e-05	Solubility/Expression	56	1	0.991649	0.930355	0.953946	0.918072
P62937-2	PPIA	Homo sapiens	Isoform 2 of Peptidyl-prolyl cis-trans isomerase A	0.166667	0.183333	0.0166667	1.58855	3.47275e-05	Solubility/Expression	58	1	1.64998	1.12991	1.03021	2.4446
P62937-2	PPIA	Homo sapiens	Isoform 2 of Peptidyl-prolyl cis-trans isomerase A	0.166667	0.183333	0.0166667	1.58855	3.47275e-05	Solubility/Expression	60	1	0.96721	0.965619	1.08826	1.25388
P62937-2	PPIA	Homo sapiens	Isoform 2 of Peptidyl-prolyl cis-trans isomerase A	0.166667	0.183333	0.0166667	1.58855	3.47275e-05	Solubility/Expression	62	1	1.01463	0.896095	0.881354	1.05614
P62937-2	PPIA	Homo sapiens	Isoform 2 of Peptidyl-prolyl cis-trans isomerase A	0.166667	0.183333	0.0166667	1.58855	3.47275e-05	Solubility/Expression	64	1	1.05189	0.881144	0.952967	1.05534
I3L2E1	CLUAP1	Homo sapiens	Clusterin-associated protein 1	0.166667	0.166667	0	1.25015	3.47275e-05	Stabilized	42	1	1.08275	0.990351	1.10179	1.08604
I3L2E1	CLUAP1	Homo sapiens	Clusterin-associated protein 1	0.166667	0.166667	0	1.25015	3.47275e-05	Stabilized	44	1	0.958297	0.985354	0.989483	0.995272
I3L2E1	CLUAP1	Homo sapiens	Clusterin-associated protein 1	0.166667	0.166667	0	1.25015	3.47275e-05	Stabilized	46	1	1.10649	1.10818	1.17285	1.10617
I3L2E1	CLUAP1	Homo sapiens	Clusterin-associated protein 1	0.166667	0.166667	0	1.25015	3.47275e-05	Stabilized	48	1	1.04312	0.844719	1.04387	1.02133
I3L2E1	CLUAP1	Homo sapiens	Clusterin-associated protein 1	0.166667	0.166667	0	1.25015	3.47275e-05	Stabilized	50	1	1.07706	1.19299	1.24816	1.06005
I3L2E1	CLUAP1	Homo sapiens	Clusterin-associated protein 1	0.166667	0.166667	0	1.25015	3.47275e-05	Stabilized	52	1	0.930638	1.06092	1.2149	1.26817
I3L2E1	CLUAP1	Homo sapiens	Clusterin-associated protein 1	0.166667	0.166667	0	1.25015	3.47275e-05	Stabilized	54	1	0.985396	0.951731	1.36126	1.16332
I3L2E1	CLUAP1	Homo sapiens	Clusterin-associated protein 1	0.166667	0.166667	0	1.25015	3.47275e-05	Stabilized	56	1	0.91706	1.18474	1.55164	1.26613
I3L2E1	CLUAP1	Homo sapiens	Clusterin-associated protein 1	0.166667	0.166667	0	1.25015	3.47275e-05	Stabilized	58	1	1.30456	1.31991	2.26356	1.77861
I3L2E1	CLUAP1	Homo sapiens	Clusterin-associated protein 1	0.166667	0.166667	0	1.25015	3.47275e-05	Stabilized	60	1	1.01996	0.975931	1.96309	2.57376
I3L2E1	CLUAP1	Homo sapiens	Clusterin-associated protein 1	0.166667	0.166667	0	1.25015	3.47275e-05	Stabilized	62	1	1.32005	0.869429	2.40282	2.85538
I3L2E1	CLUAP1	Homo sapiens	Clusterin-associated protein 1	0.166667	0.166667	0	1.25015	3.47275e-05	Stabilized	64	1	0.907346	0.713965	2.93223	2.73826
A0A0A0MQT0	RBP1	Homo sapiens	Retinol binding protein 1, cellular	0.166667	0.166667	0	1.23447	3.47275e-05	Solubility/Expression	42	1	2.00663	0.982122	1.06315	1.76374
A0A0A0MQT0	RBP1	Homo sapiens	Retinol binding protein 1, cellular	0.166667	0.166667	0	1.23447	3.47275e-05	Solubility/Expression	44	1	2.17084	0.859679	1.03399	1.79489
A0A0A0MQT0	RBP1	Homo sapiens	Retinol binding protein 1, cellular	0.166667	0.166667	0	1.23447	3.47275e-05	Solubility/Expression	46	1	1.57621	1.01876	1.27347	1.40987
A0A0A0MQT0	RBP1	Homo sapiens	Retinol binding protein 1, cellular	0.166667	0.166667	0	1.23447	3.47275e-05	Solubility/Expression	48	1	2.30849	1.04068	1.0137	1.69056
A0A0A0MQT0	RBP1	Homo sapiens	Retinol binding protein 1, cellular	0.166667	0.166667	0	1.23447	3.47275e-05	Solubility/Expression	50	1	2.23401	1.16345	1.01612	1.9813
A0A0A0MQT0	RBP1	Homo sapiens	Retinol binding protein 1, cellular	0.166667	0.166667	0	1.23447	3.47275e-05	Solubility/Expression	52	1	0.889978	0.8099	0.873781	0.858683
A0A0A0MQT0	RBP1	Homo sapiens	Retinol binding protein 1, cellular	0.166667	0.166667	0	1.23447	3.47275e-05	Solubility/Expression	54	1	0.993721	0.9243	1.06641	1.27482
A0A0A0MQT0	RBP1	Homo sapiens	Retinol binding protein 1, cellular	0.166667	0.166667	0	1.23447	3.47275e-05	Solubility/Expression	56	1	0.956586	0.842319	0.979216	1.001
A0A0A0MQT0	RBP1	Homo sapiens	Retinol binding protein 1, cellular	0.166667	0.166667	0	1.23447	3.47275e-05	Solubility/Expression	58	1	1.07158	0.956955	1.34759	1.53441
A0A0A0MQT0	RBP1	Homo sapiens	Retinol binding protein 1, cellular	0.166667	0.166667	0	1.23447	3.47275e-05	Solubility/Expression	60	1	0.83327	0.882629	1.65403	1.80392
A0A0A0MQT0	RBP1	Homo sapiens	Retinol binding protein 1, cellular	0.166667	0.166667	0	1.23447	3.47275e-05	Solubility/Expression	62	1	1.15952	0.956076	1.93421	2.16222
A0A0A0MQT0	RBP1	Homo sapiens	Retinol binding protein 1, cellular	0.166667	0.166667	0	1.23447	3.47275e-05	Solubility/Expression	64	1	1.02239	1.00675	1.41487	1.45543
E9PK25	CFL1	Homo sapiens	Cofilin-1	0.166667	0.166667	0	1.20017	3.47275e-05	Solubility/Expression	42	1	1.75933	0.878632	1.05817	1.41676
E9PK25	CFL1	Homo sapiens	Cofilin-1	0.166667	0.166667	0	1.20017	3.47275e-05	Solubility/Expression	44	1	2.41873	1.1091	0.997563	1.83995
E9PK25	CFL1	Homo sapiens	Cofilin-1	0.166667	0.166667	0	1.20017	3.47275e-05	Solubility/Expression	46	1	2.15002	1.09704	1.23011	1.96998
E9PK25	CFL1	Homo sapiens	Cofilin-1	0.166667	0.166667	0	1.20017	3.47275e-05	Solubility/Expression	48	1	2.47281	1.11586	1.20491	1.78019
E9PK25	CFL1	Homo sapiens	Cofilin-1	0.166667	0.166667	0	1.20017	3.47275e-05	Solubility/Expression	50	1	1.09246	1.31666	1.21723	1.46322
E9PK25	CFL1	Homo sapiens	Cofilin-1	0.166667	0.166667	0	1.20017	3.47275e-05	Solubility/Expression	52	1	1.08002	1.42749	1.20302	1.30159
E9PK25	CFL1	Homo sapiens	Cofilin-1	0.166667	0.166667	0	1.20017	3.47275e-05	Solubility/Expression	54	1	0.863117	1.1797	0.845016	0.968652
E9PK25	CFL1	Homo sapiens	Cofilin-1	0.166667	0.166667	0	1.20017	3.47275e-05	Solubility/Expression	56	1	0.988917	1.07656	0.926972	0.956648
E9PK25	CFL1	Homo sapiens	Cofilin-1	0.166667	0.166667	0	1.20017	3.47275e-05	Solubility/Expression	58	1	1.09413	1.11367	0.906862	0.969221
E9PK25	CFL1	Homo sapiens	Cofilin-1	0.166667	0.166667	0	1.20017	3.47275e-05	Solubility/Expression	60	1	0.926018	0.988902	1.0424	1.12545
E9PK25	CFL1	Homo sapiens	Cofilin-1	0.166667	0.166667	0	1.20017	3.47275e-05	Solubility/Expression	62	1	1.11545	1.03453	1.27507	1.40447
E9PK25	CFL1	Homo sapiens	Cofilin-1	0.166667	0.166667	0	1.20017	3.47275e-05	Solubility/Expression	64	1	0.977306	1.05509	1.26576	1.30945
P08621	SNRNP70	Homo sapiens	U1 small nuclear ribonucleoprotein 70 kDa	0.166667	0.166667	0	1.19811	3.47275e-05	Solubility/Expression	42	1	1.43859	1.44106	1.44785	1.65289
P08621	SNRNP70	Homo sapiens	U1 small nuclear ribonucleoprotein 70 kDa	0.166667	0.166667	0	1.19811	3.47275e-05	Solubility/Expression	44	1	1.40537	1.27946	1.64899	1.42735
P08621	SNRNP70	Homo sapiens	U1 small nuclear ribonucleoprotein 70 kDa	0.166667	0.166667	0	1.19811	3.47275e-05	Solubility/Expression	46	1	1.18211	1.07165	1.36834	1.49525
P08621	SNRNP70	Homo sapiens	U1 small nuclear ribonucleoprotein 70 kDa	0.166667	0.166667	0	1.19811	3.47275e-05	Solubility/Expression	48	1	1.13425	1.62749	1.56278	1.70113
P08621	SNRNP70	Homo sapiens	U1 small nuclear ribonucleoprotein 70 kDa	0.166667	0.166667	0	1.19811	3.47275e-05	Solubility/Expression	50	1	0.97086	1.26852	1.20308	1.29795
P08621	SNRNP70	Homo sapiens	U1 small nuclear ribonucleoprotein 70 kDa	0.166667	0.166667	0	1.19811	3.47275e-05	Solubility/Expression	52	1	1.32808	1.34366	1.29924	1.36341
P08621	SNRNP70	Homo sapiens	U1 small nuclear ribonucleoprotein 70 kDa	0.166667	0.166667	0	1.19811	3.47275e-05	Solubility/Expression	54	1	0.706961	0.80459	0.970924	1.14758
P08621	SNRNP70	Homo sapiens	U1 small nuclear ribonucleoprotein 70 kDa	0.166667	0.166667	0	1.19811	3.47275e-05	Solubility/Expression	56	1	1.02324	0.91538	0.986308	1.27549
P08621	SNRNP70	Homo sapiens	U1 small nuclear ribonucleoprotein 70 kDa	0.166667	0.166667	0	1.19811	3.47275e-05	Solubility/Expression	58	1	1.16873	1.12186	1.37822	1.56217
P08621	SNRNP70	Homo sapiens	U1 small nuclear ribonucleoprotein 70 kDa	0.166667	0.166667	0	1.19811	3.47275e-05	Solubility/Expression	60	1	0.976264	1.01643	1.26344	1.37609
P08621	SNRNP70	Homo sapiens	U1 small nuclear ribonucleoprotein 70 kDa	0.166667	0.166667	0	1.19811	3.47275e-05	Solubility/Expression	62	1	1.22189	0.956258	1.40436	1.53341
P08621	SNRNP70	Homo sapiens	U1 small nuclear ribonucleoprotein 70 kDa	0.166667	0.166667	0	1.19811	3.47275e-05	Solubility/Expression	64	1	0.910295	0.869965	1.08551	1.25189
P15559	NQO1	Homo sapiens	NAD(P)H dehydrogenase [quinone] 1	0.166667	0.166667	0	1.19272	3.47275e-05	Solubility/Expression	42	1	1.69689	1.07659	1.35751	1.83599
P15559	NQO1	Homo sapiens	NAD(P)H dehydrogenase [quinone] 1	0.166667	0.166667	0	1.19272	3.47275e-05	Solubility/Expression	44	1	1.04529	0.915737	1.10891	1.05737
P15559	NQO1	Homo sapiens	NAD(P)H dehydrogenase [quinone] 1	0.166667	0.166667	0	1.19272	3.47275e-05	Solubility/Expression	46	1	1.62584	0.815292	0.865867	1.39412
P15559	NQO1	Homo sapiens	NAD(P)H dehydrogenase [quinone] 1	0.166667	0.166667	0	1.19272	3.47275e-05	Solubility/Expression	48	1	1.26242	1.1021	1.19947	1.13271
P15559	NQO1	Homo sapiens	NAD(P)H dehydrogenase [quinone] 1	0.166667	0.166667	0	1.19272	3.47275e-05	Solubility/Expression	50	1	1.10124	1.06062	1.16703	1.12855
P15559	NQO1	Homo sapiens	NAD(P)H dehydrogenase [quinone] 1	0.166667	0.166667	0	1.19272	3.47275e-05	Solubility/Expression	52	1	0.974582	0.884474	1.09054	1.004
P15559	NQO1	Homo sapiens	NAD(P)H dehydrogenase [quinone] 1	0.166667	0.166667	0	1.19272	3.47275e-05	Solubility/Expression	54	1	0.968828	0.92972	1.07203	1.1238
P15559	NQO1	Homo sapiens	NAD(P)H dehydrogenase [quinone] 1	0.166667	0.166667	0	1.19272	3.47275e-05	Solubility/Expression	56	1	1.03834	1.14933	1.54911	1.52988
P15559	NQO1	Homo sapiens	NAD(P)H dehydrogenase [quinone] 1	0.166667	0.166667	0	1.19272	3.47275e-05	Solubility/Expression	58	1	1.10275	1.00058	1.68932	1.81653
P15559	NQO1	Homo sapiens	NAD(P)H dehydrogenase [quinone] 1	0.166667	0.166667	0	1.19272	3.47275e-05	Solubility/Expression	60	1	0.909358	0.978135	1.35734	1.36102
P15559	NQO1	Homo sapiens	NAD(P)H dehydrogenase [quinone] 1	0.166667	0.166667	0	1.19272	3.47275e-05	Solubility/Expression	62	1	1.21647	0.959911	2.11876	2.15215
P15559	NQO1	Homo sapiens	NAD(P)H dehydrogenase [quinone] 1	0.166667	0.166667	0	1.19272	3.47275e-05	Solubility/Expression	64	1	1.03687	0.979437	1.79151	1.82907
Q8WUY8	NAT14	Homo sapiens	N-acetyltransferase 14	0.166667	0.166667	0	1.19156	3.47275e-05	Stabilized	42	1	1.03629	1.04038	1.06244	1.00729
Q8WUY8	NAT14	Homo sapiens	N-acetyltransferase 14	0.166667	0.166667	0	1.19156	3.47275e-05	Stabilized	44	1	0.946363	1.01763	0.956262	0.923069
Q8WUY8	NAT14	Homo sapiens	N-acetyltransferase 14	0.166667	0.166667	0	1.19156	3.47275e-05	Stabilized	46	1	0.994191	1.11255	1.04124	1.0431
Q8WUY8	NAT14	Homo sapiens	N-acetyltransferase 14	0.166667	0.166667	0	1.19156	3.47275e-05	Stabilized	48	1	1.01751	1.02955	1.13453	1.03041
Q8WUY8	NAT14	Homo sapiens	N-acetyltransferase 14	0.166667	0.166667	0	1.19156	3.47275e-05	Stabilized	50	1	1.00926	1.01892	1.05825	0.969677
Q8WUY8	NAT14	Homo sapiens	N-acetyltransferase 14	0.166667	0.166667	0	1.19156	3.47275e-05	Stabilized	52	1	0.949104	0.960701	1.05224	0.958754
Q8WUY8	NAT14	Homo sapiens	N-acetyltransferase 14	0.166667	0.166667	0	1.19156	3.47275e-05	Stabilized	54	1	0.943422	0.712083	1.10565	1.0611
Q8WUY8	NAT14	Homo sapiens	N-acetyltransferase 14	0.166667	0.166667	0	1.19156	3.47275e-05	Stabilized	56	1	0.799612	0.891723	1.25531	1.20546
Q8WUY8	NAT14	Homo sapiens	N-acetyltransferase 14	0.166667	0.166667	0	1.19156	3.47275e-05	Stabilized	58	1	0.939633	0.910135	1.18295	1.36187
Q8WUY8	NAT14	Homo sapiens	N-acetyltransferase 14	0.166667	0.166667	0	1.19156	3.47275e-05	Stabilized	60	1	0.833753	0.759938	1.16299	1.1442
Q8WUY8	NAT14	Homo sapiens	N-acetyltransferase 14	0.166667	0.166667	0	1.19156	3.47275e-05	Stabilized	62	1	1.55414	1.99835	2.72916	3.62413
Q8WUY8	NAT14	Homo sapiens	N-acetyltransferase 14	0.166667	0.166667	0	1.19156	3.47275e-05	Stabilized	64	1	1.01722	0.96974	3.60351	3.35766
P07900-2	HSP90AA1	Homo sapiens	Isoform 2 of Heat shock protein HSP 90-alpha	0.166667	0.166667	0	1.1796	3.47275e-05	Solubility/Expression	42	1	1.80482	1.34165	1.27047	1.59059
P07900-2	HSP90AA1	Homo sapiens	Isoform 2 of Heat shock protein HSP 90-alpha	0.166667	0.166667	0	1.1796	3.47275e-05	Solubility/Expression	44	1	1.63837	1.24467	1.13223	1.51802
P07900-2	HSP90AA1	Homo sapiens	Isoform 2 of Heat shock protein HSP 90-alpha	0.166667	0.166667	0	1.1796	3.47275e-05	Solubility/Expression	46	1	1.25129	1.03137	1.10824	1.26768
P07900-2	HSP90AA1	Homo sapiens	Isoform 2 of Heat shock protein HSP 90-alpha	0.166667	0.166667	0	1.1796	3.47275e-05	Solubility/Expression	48	1	1.15296	1.02379	1.06043	1.10448
P07900-2	HSP90AA1	Homo sapiens	Isoform 2 of Heat shock protein HSP 90-alpha	0.166667	0.166667	0	1.1796	3.47275e-05	Solubility/Expression	50	1	1.37257	1.06143	1.06985	1.22794
P07900-2	HSP90AA1	Homo sapiens	Isoform 2 of Heat shock protein HSP 90-alpha	0.166667	0.166667	0	1.1796	3.47275e-05	Solubility/Expression	52	1	0.917037	0.854832	0.984245	0.989705
P07900-2	HSP90AA1	Homo sapiens	Isoform 2 of Heat shock protein HSP 90-alpha	0.166667	0.166667	0	1.1796	3.47275e-05	Solubility/Expression	54	1	0.969352	0.878398	1.19377	1.20581
P07900-2	HSP90AA1	Homo sapiens	Isoform 2 of Heat shock protein HSP 90-alpha	0.166667	0.166667	0	1.1796	3.47275e-05	Solubility/Expression	56	1	0.884577	0.856294	1.02298	1.05829
P07900-2	HSP90AA1	Homo sapiens	Isoform 2 of Heat shock protein HSP 90-alpha	0.166667	0.166667	0	1.1796	3.47275e-05	Solubility/Expression	58	1	0.959678	0.870435	1.31542	1.44696
P07900-2	HSP90AA1	Homo sapiens	Isoform 2 of Heat shock protein HSP 90-alpha	0.166667	0.166667	0	1.1796	3.47275e-05	Solubility/Expression	60	1	0.842775	0.889784	1.58651	1.69319
P07900-2	HSP90AA1	Homo sapiens	Isoform 2 of Heat shock protein HSP 90-alpha	0.166667	0.166667	0	1.1796	3.47275e-05	Solubility/Expression	62	1	1.03377	0.860677	1.92121	2.13773
P07900-2	HSP90AA1	Homo sapiens	Isoform 2 of Heat shock protein HSP 90-alpha	0.166667	0.166667	0	1.1796	3.47275e-05	Solubility/Expression	64	1	0.953874	0.913642	2.07718	2.18521
P26641-2	EEF1G	Homo sapiens	Isoform 2 of Elongation factor 1-gamma	0.166667	0.166667	0	1.17278	3.47275e-05	Stabilized	42	1	1.52482	1.00257	1.04334	1.5472
P26641-2	EEF1G	Homo sapiens	Isoform 2 of Elongation factor 1-gamma	0.166667	0.166667	0	1.17278	3.47275e-05	Stabilized	44	1	2.07221	0.975061	1.13115	1.74573
P26641-2	EEF1G	Homo sapiens	Isoform 2 of Elongation factor 1-gamma	0.166667	0.166667	0	1.17278	3.47275e-05	Stabilized	46	1	2.12349	1.02094	1.24044	1.7497
P26641-2	EEF1G	Homo sapiens	Isoform 2 of Elongation factor 1-gamma	0.166667	0.166667	0	1.17278	3.47275e-05	Stabilized	48	1	1.09067	1.03034	1.02812	1.05303
P26641-2	EEF1G	Homo sapiens	Isoform 2 of Elongation factor 1-gamma	0.166667	0.166667	0	1.17278	3.47275e-05	Stabilized	50	1	1.39869	1.24338	1.22636	1.36536
P26641-2	EEF1G	Homo sapiens	Isoform 2 of Elongation factor 1-gamma	0.166667	0.166667	0	1.17278	3.47275e-05	Stabilized	52	1	0.874828	0.657843	0.787277	0.732155
P26641-2	EEF1G	Homo sapiens	Isoform 2 of Elongation factor 1-gamma	0.166667	0.166667	0	1.17278	3.47275e-05	Stabilized	54	1	0.975328	0.89172	1.08684	1.17913
P26641-2	EEF1G	Homo sapiens	Isoform 2 of Elongation factor 1-gamma	0.166667	0.166667	0	1.17278	3.47275e-05	Stabilized	56	1	0.770772	0.718115	0.926684	0.976933
P26641-2	EEF1G	Homo sapiens	Isoform 2 of Elongation factor 1-gamma	0.166667	0.166667	0	1.17278	3.47275e-05	Stabilized	58	1	0.919382	0.858363	1.27668	1.44194
P26641-2	EEF1G	Homo sapiens	Isoform 2 of Elongation factor 1-gamma	0.166667	0.166667	0	1.17278	3.47275e-05	Stabilized	60	1	0.963846	0.886997	1.57931	1.67443
P26641-2	EEF1G	Homo sapiens	Isoform 2 of Elongation factor 1-gamma	0.166667	0.166667	0	1.17278	3.47275e-05	Stabilized	62	1	1.02684	0.963129	1.8065	1.96174
P26641-2	EEF1G	Homo sapiens	Isoform 2 of Elongation factor 1-gamma	0.166667	0.166667	0	1.17278	3.47275e-05	Stabilized	64	1	0.910529	0.919776	1.87745	2.10947
P40261	NNMT	Homo sapiens	Nicotinamide N-methyltransferase	0.166667	0.166667	0	1.1672	3.47275e-05	Stabilized	42	1	1.02887	1.15635	1.08019	1.12091
P40261	NNMT	Homo sapiens	Nicotinamide N-methyltransferase	0.166667	0.166667	0	1.1672	3.47275e-05	Stabilized	44	1	1.62914	1.0335	1.02778	1.45804
P40261	NNMT	Homo sapiens	Nicotinamide N-methyltransferase	0.166667	0.166667	0	1.1672	3.47275e-05	Stabilized	46	1	2.03665	1.05582	1.00905	1.55023
P40261	NNMT	Homo sapiens	Nicotinamide N-methyltransferase	0.166667	0.166667	0	1.1672	3.47275e-05	Stabilized	48	1	1.03519	1.09126	0.946074	0.995498
P40261	NNMT	Homo sapiens	Nicotinamide N-methyltransferase	0.166667	0.166667	0	1.1672	3.47275e-05	Stabilized	50	1	1.13799	1.53437	1.74253	1.79758
P40261	NNMT	Homo sapiens	Nicotinamide N-methyltransferase	0.166667	0.166667	0	1.1672	3.47275e-05	Stabilized	52	1	1.03453	1.10507	0.983061	1.07725
P40261	NNMT	Homo sapiens	Nicotinamide N-methyltransferase	0.166667	0.166667	0	1.1672	3.47275e-05	Stabilized	54	1	0.817587	1.15609	0.725614	0.962701
P40261	NNMT	Homo sapiens	Nicotinamide N-methyltransferase	0.166667	0.166667	0	1.1672	3.47275e-05	Stabilized	56	1	1.05075	1.13103	1.03135	1.17242
P40261	NNMT	Homo sapiens	Nicotinamide N-methyltransferase	0.166667	0.166667	0	1.1672	3.47275e-05	Stabilized	58	1	1.22688	1.24853	1.14696	1.50536
P40261	NNMT	Homo sapiens	Nicotinamide N-methyltransferase	0.166667	0.166667	0	1.1672	3.47275e-05	Stabilized	60	1	0.811925	0.857081	1.29583	1.58347
P40261	NNMT	Homo sapiens	Nicotinamide N-methyltransferase	0.166667	0.166667	0	1.1672	3.47275e-05	Stabilized	62	1	1.24839	0.891088	1.67655	1.87173
P40261	NNMT	Homo sapiens	Nicotinamide N-methyltransferase	0.166667	0.166667	0	1.1672	3.47275e-05	Stabilized	64	1	0.998141	0.926873	1.45356	1.57487
P60903	S100A10	Homo sapiens	Protein S100-A10	0.166667	0.166667	0	1.16645	3.47275e-05	Stabilized	42	1	1.05331	1.0304	1.06367	1.13175
P60903	S100A10	Homo sapiens	Protein S100-A10	0.166667	0.166667	0	1.16645	3.47275e-05	Stabilized	44	1	1.9749	0.915616	0.967327	1.64549
P60903	S100A10	Homo sapiens	Protein S100-A10	0.166667	0.166667	0	1.16645	3.47275e-05	Stabilized	46	1	2.38001	0.884957	1.28884	1.85114
P60903	S100A10	Homo sapiens	Protein S100-A10	0.166667	0.166667	0	1.16645	3.47275e-05	Stabilized	48	1	1.11854	1.16498	1.22762	1.16167
P60903	S100A10	Homo sapiens	Protein S100-A10	0.166667	0.166667	0	1.16645	3.47275e-05	Stabilized	50	1	1.07667	1.10014	1.0763	1.80201
P60903	S100A10	Homo sapiens	Protein S100-A10	0.166667	0.166667	0	1.16645	3.47275e-05	Stabilized	52	1	1.02645	1.11362	1.24481	1.83759
P60903	S100A10	Homo sapiens	Protein S100-A10	0.166667	0.166667	0	1.16645	3.47275e-05	Stabilized	54	1	0.99982	1.06728	0.963745	1.07852
P60903	S100A10	Homo sapiens	Protein S100-A10	0.166667	0.166667	0	1.16645	3.47275e-05	Stabilized	56	1	0.95752	1.17115	1.03352	1.12242
P60903	S100A10	Homo sapiens	Protein S100-A10	0.166667	0.166667	0	1.16645	3.47275e-05	Stabilized	58	1	1.00655	1.01212	1.11808	1.19766
P60903	S100A10	Homo sapiens	Protein S100-A10	0.166667	0.166667	0	1.16645	3.47275e-05	Stabilized	60	1	0.916168	1.01729	1.21106	1.24848
P60903	S100A10	Homo sapiens	Protein S100-A10	0.166667	0.166667	0	1.16645	3.47275e-05	Stabilized	62	1	1.0615	1.05742	1.30743	1.36601
P60903	S100A10	Homo sapiens	Protein S100-A10	0.166667	0.166667	0	1.16645	3.47275e-05	Stabilized	64	1	0.86708	1.11146	1.41247	1.54451
P41091	EIF2S3	Homo sapiens	Eukaryotic translation initiation factor 2 subunit 3	0.166667	0.166667	0	1.16302	3.47275e-05	Stabilized	42	1	1.62978	1.23295	1.27544	1.50906
P41091	EIF2S3	Homo sapiens	Eukaryotic translation initiation factor 2 subunit 3	0.166667	0.166667	0	1.16302	3.47275e-05	Stabilized	44	1	1.21595	0.912529	1.39703	1.17134
P41091	EIF2S3	Homo sapiens	Eukaryotic translation initiation factor 2 subunit 3	0.166667	0.166667	0	1.16302	3.47275e-05	Stabilized	46	1	1.86197	1.192	1.22408	1.48459
P41091	EIF2S3	Homo sapiens	Eukaryotic translation initiation factor 2 subunit 3	0.166667	0.166667	0	1.16302	3.47275e-05	Stabilized	48	1	1.31084	1.08619	1.28079	1.21693
P41091	EIF2S3	Homo sapiens	Eukaryotic translation initiation factor 2 subunit 3	0.166667	0.166667	0	1.16302	3.47275e-05	Stabilized	50	1	1.00425	1.09884	1.0875	1.09525
P41091	EIF2S3	Homo sapiens	Eukaryotic translation initiation factor 2 subunit 3	0.166667	0.166667	0	1.16302	3.47275e-05	Stabilized	52	1	1.08163	1.10165	1.09349	1.12226
P41091	EIF2S3	Homo sapiens	Eukaryotic translation initiation factor 2 subunit 3	0.166667	0.166667	0	1.16302	3.47275e-05	Stabilized	54	1	0.9942	1.09094	1.06579	1.04784
P41091	EIF2S3	Homo sapiens	Eukaryotic translation initiation factor 2 subunit 3	0.166667	0.166667	0	1.16302	3.47275e-05	Stabilized	56	1	0.944347	0.969008	0.930579	1.01743
P41091	EIF2S3	Homo sapiens	Eukaryotic translation initiation factor 2 subunit 3	0.166667	0.166667	0	1.16302	3.47275e-05	Stabilized	58	1	1.20241	1.08682	1.14145	1.26528
P41091	EIF2S3	Homo sapiens	Eukaryotic translation initiation factor 2 subunit 3	0.166667	0.166667	0	1.16302	3.47275e-05	Stabilized	60	1	0.912387	0.890109	1.18943	1.3473
P41091	EIF2S3	Homo sapiens	Eukaryotic translation initiation factor 2 subunit 3	0.166667	0.166667	0	1.16302	3.47275e-05	Stabilized	62	1	1.1955	0.948857	1.61083	1.85095
P41091	EIF2S3	Homo sapiens	Eukaryotic translation initiation factor 2 subunit 3	0.166667	0.166667	0	1.16302	3.47275e-05	Stabilized	64	1	1.05087	1.0066	1.64321	1.69282
P55084	HADHB	Homo sapiens	Trifunctional enzyme subunit beta, mitochondrial	0.166667	0.166667	0	1.13993	3.47275e-05	Stabilized	42	1	1.44797	1.08959	1.14844	1.24754
P55084	HADHB	Homo sapiens	Trifunctional enzyme subunit beta, mitochondrial	0.166667	0.166667	0	1.13993	3.47275e-05	Stabilized	44	1	1.16389	1.11601	1.06861	1.10477
P55084	HADHB	Homo sapiens	Trifunctional enzyme subunit beta, mitochondrial	0.166667	0.166667	0	1.13993	3.47275e-05	Stabilized	46	1	1.64715	1.03639	1.06872	1.39916
P55084	HADHB	Homo sapiens	Trifunctional enzyme subunit beta, mitochondrial	0.166667	0.166667	0	1.13993	3.47275e-05	Stabilized	48	1	1.13079	0.96639	0.976832	1.06644
P55084	HADHB	Homo sapiens	Trifunctional enzyme subunit beta, mitochondrial	0.166667	0.166667	0	1.13993	3.47275e-05	Stabilized	50	1	1.0234	1.05871	1.06146	1.09413
P55084	HADHB	Homo sapiens	Trifunctional enzyme subunit beta, mitochondrial	0.166667	0.166667	0	1.13993	3.47275e-05	Stabilized	52	1	0.854585	0.78644	0.984612	0.891346
P55084	HADHB	Homo sapiens	Trifunctional enzyme subunit beta, mitochondrial	0.166667	0.166667	0	1.13993	3.47275e-05	Stabilized	54	1	0.963697	0.915701	1.14265	1.27902
P55084	HADHB	Homo sapiens	Trifunctional enzyme subunit beta, mitochondrial	0.166667	0.166667	0	1.13993	3.47275e-05	Stabilized	56	1	0.963108	0.857368	1.15422	1.11975
P55084	HADHB	Homo sapiens	Trifunctional enzyme subunit beta, mitochondrial	0.166667	0.166667	0	1.13993	3.47275e-05	Stabilized	58	1	1.13208	0.886465	1.61213	1.79526
P55084	HADHB	Homo sapiens	Trifunctional enzyme subunit beta, mitochondrial	0.166667	0.166667	0	1.13993	3.47275e-05	Stabilized	60	1	0.93755	0.825116	1.59849	1.7313
P55084	HADHB	Homo sapiens	Trifunctional enzyme subunit beta, mitochondrial	0.166667	0.166667	0	1.13993	3.47275e-05	Stabilized	62	1	1.08556	0.967513	1.62089	1.67598
P55084	HADHB	Homo sapiens	Trifunctional enzyme subunit beta, mitochondrial	0.166667	0.166667	0	1.13993	3.47275e-05	Stabilized	64	1	1.06687	1.00053	1.79359	1.83771
P27797	CALR	Homo sapiens	Calreticulin	0.166667	0.166667	0	1.13291	3.47275e-05	Solubility/Expression	42	1	2.30464	0.82693	0.837454	1.68233
P27797	CALR	Homo sapiens	Calreticulin	0.166667	0.166667	0	1.13291	3.47275e-05	Solubility/Expression	44	1	2.4985	1.15123	1.07307	1.89854
P27797	CALR	Homo sapiens	Calreticulin	0.166667	0.166667	0	1.13291	3.47275e-05	Solubility/Expression	46	1	1.58476	1.15899	1.13994	1.34009
P27797	CALR	Homo sapiens	Calreticulin	0.166667	0.166667	0	1.13291	3.47275e-05	Solubility/Expression	48	1	1.38562	1.13676	1.05283	1.39046
P27797	CALR	Homo sapiens	Calreticulin	0.166667	0.166667	0	1.13291	3.47275e-05	Solubility/Expression	50	1	1.02294	1.40953	1.37542	1.35264
P27797	CALR	Homo sapiens	Calreticulin	0.166667	0.166667	0	1.13291	3.47275e-05	Solubility/Expression	52	1	1.07698	1.15165	1.09027	1.29435
P27797	CALR	Homo sapiens	Calreticulin	0.166667	0.166667	0	1.13291	3.47275e-05	Solubility/Expression	54	1	1.08128	1.16912	1.01166	0.948635
P27797	CALR	Homo sapiens	Calreticulin	0.166667	0.166667	0	1.13291	3.47275e-05	Solubility/Expression	56	1	0.889	1.00594	0.833086	0.846318
P27797	CALR	Homo sapiens	Calreticulin	0.166667	0.166667	0	1.13291	3.47275e-05	Solubility/Expression	58	1	1.00658	1.14508	0.890039	0.903032
P27797	CALR	Homo sapiens	Calreticulin	0.166667	0.166667	0	1.13291	3.47275e-05	Solubility/Expression	60	1	0.974367	1.15045	0.812792	0.845474
P27797	CALR	Homo sapiens	Calreticulin	0.166667	0.166667	0	1.13291	3.47275e-05	Solubility/Expression	62	1	1.00425	1.22654	0.836926	0.81843
P27797	CALR	Homo sapiens	Calreticulin	0.166667	0.166667	0	1.13291	3.47275e-05	Solubility/Expression	64	1	1.1119	1.43317	0.905388	0.889021
Q7Z6J6	FRMD5	Homo sapiens	FERM domain-containing protein 5	0.166667	0.166667	0	1.13268	3.47275e-05	Stabilized	42	1	1.03064	1.01957	1.03761	1.00212
Q7Z6J6	FRMD5	Homo sapiens	FERM domain-containing protein 5	0.166667	0.166667	0	1.13268	3.47275e-05	Stabilized	44	1	1.04528	1.08891	1.07636	1.0213
Q7Z6J6	FRMD5	Homo sapiens	FERM domain-containing protein 5	0.166667	0.166667	0	1.13268	3.47275e-05	Stabilized	46	1	0.963656	0.994991	1.04654	0.972587
Q7Z6J6	FRMD5	Homo sapiens	FERM domain-containing protein 5	0.166667	0.166667	0	1.13268	3.47275e-05	Stabilized	48	1	0.979401	1.01413	1.26534	1.06027
Q7Z6J6	FRMD5	Homo sapiens	FERM domain-containing protein 5	0.166667	0.166667	0	1.13268	3.47275e-05	Stabilized	50	NaN	NaN	NaN	NaN	NaN
Q7Z6J6	FRMD5	Homo sapiens	FERM domain-containing protein 5	0.166667	0.166667	0	1.13268	3.47275e-05	Stabilized	52	NaN	NaN	NaN	NaN	NaN
Q7Z6J6	FRMD5	Homo sapiens	FERM domain-containing protein 5	0.166667	0.166667	0	1.13268	3.47275e-05	Stabilized	54	NaN	NaN	NaN	NaN	NaN
Q7Z6J6	FRMD5	Homo sapiens	FERM domain-containing protein 5	0.166667	0.166667	0	1.13268	3.47275e-05	Stabilized	56	NaN	NaN	NaN	NaN	NaN
Q7Z6J6	FRMD5	Homo sapiens	FERM domain-containing protein 5	0.166667	0.166667	0	1.13268	3.47275e-05	Stabilized	58	1	1.08383	1.05987	1.22246	1.25819
Q7Z6J6	FRMD5	Homo sapiens	FERM domain-containing protein 5	0.166667	0.166667	0	1.13268	3.47275e-05	Stabilized	60	1	2.65534	1.13656	1.70095	2.26719
Q7Z6J6	FRMD5	Homo sapiens	FERM domain-containing protein 5	0.166667	0.166667	0	1.13268	3.47275e-05	Stabilized	62	1	1.44105	1.17172	1.27072	1.27288
Q7Z6J6	FRMD5	Homo sapiens	FERM domain-containing protein 5	0.166667	0.166667	0	1.13268	3.47275e-05	Stabilized	64	1	1.15019	1.07332	1.68607	1.89168
A0A0B4J2C3	TPT1	Homo sapiens	Translationally-controlled tumor protein	0.166667	0.166667	0	1.1325	3.47275e-05	Stabilized	42	1	0.896104	0.860738	0.861099	0.899571
A0A0B4J2C3	TPT1	Homo sapiens	Translationally-controlled tumor protein	0.166667	0.166667	0	1.1325	3.47275e-05	Stabilized	44	1	0.98438	0.91609	0.998515	1.11267
A0A0B4J2C3	TPT1	Homo sapiens	Translationally-controlled tumor protein	0.166667	0.166667	0	1.1325	3.47275e-05	Stabilized	46	1	1.04086	0.957412	1.12219	1.77143
A0A0B4J2C3	TPT1	Homo sapiens	Translationally-controlled tumor protein	0.166667	0.166667	0	1.1325	3.47275e-05	Stabilized	48	1	2.19947	1.03273	1.15674	1.65342
A0A0B4J2C3	TPT1	Homo sapiens	Translationally-controlled tumor protein	0.166667	0.166667	0	1.1325	3.47275e-05	Stabilized	50	1	1.0804	1.05083	1.00616	1.14793
A0A0B4J2C3	TPT1	Homo sapiens	Translationally-controlled tumor protein	0.166667	0.166667	0	1.1325	3.47275e-05	Stabilized	52	1	1.03626	1.01831	1.06998	1.01931
A0A0B4J2C3	TPT1	Homo sapiens	Translationally-controlled tumor protein	0.166667	0.166667	0	1.1325	3.47275e-05	Stabilized	54	1	0.941346	1.04035	0.909096	1.05677
A0A0B4J2C3	TPT1	Homo sapiens	Translationally-controlled tumor protein	0.166667	0.166667	0	1.1325	3.47275e-05	Stabilized	56	1	0.969098	0.982122	0.939731	0.97743
A0A0B4J2C3	TPT1	Homo sapiens	Translationally-controlled tumor protein	0.166667	0.166667	0	1.1325	3.47275e-05	Stabilized	58	1	1.21072	1.116	1.231	1.46146
A0A0B4J2C3	TPT1	Homo sapiens	Translationally-controlled tumor protein	0.166667	0.166667	0	1.1325	3.47275e-05	Stabilized	60	1	0.935603	0.996055	1.34513	1.59614
A0A0B4J2C3	TPT1	Homo sapiens	Translationally-controlled tumor protein	0.166667	0.166667	0	1.1325	3.47275e-05	Stabilized	62	1	1.27054	1.04274	2.06177	1.87589
A0A0B4J2C3	TPT1	Homo sapiens	Translationally-controlled tumor protein	0.166667	0.166667	0	1.1325	3.47275e-05	Stabilized	64	1	0.918332	0.929748	1.60961	1.64089
Q9NR45	NANS	Homo sapiens	Sialic acid synthase	0.166667	0.166667	0	1.13022	3.47275e-05	Stabilized	42	1	1.10541	1.0948	1.0951	1.09463
Q9NR45	NANS	Homo sapiens	Sialic acid synthase	0.166667	0.166667	0	1.13022	3.47275e-05	Stabilized	44	1	1.17225	1.10792	1.10335	1.05953
Q9NR45	NANS	Homo sapiens	Sialic acid synthase	0.166667	0.166667	0	1.13022	3.47275e-05	Stabilized	46	1	1.10909	1.00552	1.11249	1.05068
Q9NR45	NANS	Homo sapiens	Sialic acid synthase	0.166667	0.166667	0	1.13022	3.47275e-05	Stabilized	48	1	0.995982	1.00186	1.00284	0.916477
Q9NR45	NANS	Homo sapiens	Sialic acid synthase	0.166667	0.166667	0	1.13022	3.47275e-05	Stabilized	50	1	1.03668	1.04321	1.04239	0.964059
Q9NR45	NANS	Homo sapiens	Sialic acid synthase	0.166667	0.166667	0	1.13022	3.47275e-05	Stabilized	52	1	1.03689	1.07137	1.07392	1.02167
Q9NR45	NANS	Homo sapiens	Sialic acid synthase	0.166667	0.166667	0	1.13022	3.47275e-05	Stabilized	54	1	1.00137	1.03632	0.889349	0.915828
Q9NR45	NANS	Homo sapiens	Sialic acid synthase	0.166667	0.166667	0	1.13022	3.47275e-05	Stabilized	56	1	0.97718	1.22532	0.904832	0.982562
Q9NR45	NANS	Homo sapiens	Sialic acid synthase	0.166667	0.166667	0	1.13022	3.47275e-05	Stabilized	58	1	1.16678	1.06778	1.21726	1.39034
Q9NR45	NANS	Homo sapiens	Sialic acid synthase	0.166667	0.166667	0	1.13022	3.47275e-05	Stabilized	60	1	1.01891	1.12904	1.64919	1.60431
Q9NR45	NANS	Homo sapiens	Sialic acid synthase	0.166667	0.166667	0	1.13022	3.47275e-05	Stabilized	62	1	1.25899	1.17245	1.74749	2.07282
Q9NR45	NANS	Homo sapiens	Sialic acid synthase	0.166667	0.166667	0	1.13022	3.47275e-05	Stabilized	64	1	1.13736	0.860718	2.02297	2.04574
P34932	HSPA4	Homo sapiens	Heat shock 70 kDa protein 4	0.166667	0.166667	0	1.12934	3.47275e-05	Stabilized	42	1	1.57345	1.03292	1.24612	1.39039
P34932	HSPA4	Homo sapiens	Heat shock 70 kDa protein 4	0.166667	0.166667	0	1.12934	3.47275e-05	Stabilized	44	1	1.632	0.925609	1.13758	1.39133
P34932	HSPA4	Homo sapiens	Heat shock 70 kDa protein 4	0.166667	0.166667	0	1.12934	3.47275e-05	Stabilized	46	1	1.4373	1.05717	1.13042	1.23782
P34932	HSPA4	Homo sapiens	Heat shock 70 kDa protein 4	0.166667	0.166667	0	1.12934	3.47275e-05	Stabilized	48	1	1.39873	1.02832	1.08808	1.17535
P34932	HSPA4	Homo sapiens	Heat shock 70 kDa protein 4	0.166667	0.166667	0	1.12934	3.47275e-05	Stabilized	50	1	1.25111	1.03263	1.22839	1.1867
P34932	HSPA4	Homo sapiens	Heat shock 70 kDa protein 4	0.166667	0.166667	0	1.12934	3.47275e-05	Stabilized	52	1	0.988796	0.914264	1.12598	1.0041
P34932	HSPA4	Homo sapiens	Heat shock 70 kDa protein 4	0.166667	0.166667	0	1.12934	3.47275e-05	Stabilized	54	1	0.965738	0.804414	1.05575	1.16699
P34932	HSPA4	Homo sapiens	Heat shock 70 kDa protein 4	0.166667	0.166667	0	1.12934	3.47275e-05	Stabilized	56	1	0.872237	0.812952	1.10167	1.12287
P34932	HSPA4	Homo sapiens	Heat shock 70 kDa protein 4	0.166667	0.166667	0	1.12934	3.47275e-05	Stabilized	58	1	0.903318	0.817146	1.20748	1.30504
P34932	HSPA4	Homo sapiens	Heat shock 70 kDa protein 4	0.166667	0.166667	0	1.12934	3.47275e-05	Stabilized	60	1	0.827421	0.830916	1.30247	1.41232
P34932	HSPA4	Homo sapiens	Heat shock 70 kDa protein 4	0.166667	0.166667	0	1.12934	3.47275e-05	Stabilized	62	1	1.11178	0.867766	1.56278	1.70536
P34932	HSPA4	Homo sapiens	Heat shock 70 kDa protein 4	0.166667	0.166667	0	1.12934	3.47275e-05	Stabilized	64	1	0.933017	0.87029	1.71305	1.87304
Q9Y3E7	CHMP3	Homo sapiens	Charged multivesicular body protein 3	0.166667	0.166667	0	1.1216	3.47275e-05	Stabilized	42	1	0.995092	1.00007	1.00266	1.02765
Q9Y3E7	CHMP3	Homo sapiens	Charged multivesicular body protein 3	0.166667	0.166667	0	1.1216	3.47275e-05	Stabilized	44	1	1.00573	0.991893	1.05126	1.0011
Q9Y3E7	CHMP3	Homo sapiens	Charged multivesicular body protein 3	0.166667	0.166667	0	1.1216	3.47275e-05	Stabilized	46	1	0.913423	0.96441	1.00077	1.02184
Q9Y3E7	CHMP3	Homo sapiens	Charged multivesicular body protein 3	0.166667	0.166667	0	1.1216	3.47275e-05	Stabilized	48	1	1.02483	1.01847	0.957302	0.96419
Q9Y3E7	CHMP3	Homo sapiens	Charged multivesicular body protein 3	0.166667	0.166667	0	1.1216	3.47275e-05	Stabilized	50	1	0.998135	1.02338	1.08739	1.03014
Q9Y3E7	CHMP3	Homo sapiens	Charged multivesicular body protein 3	0.166667	0.166667	0	1.1216	3.47275e-05	Stabilized	52	1	0.981153	0.933992	0.948142	1.01993
Q9Y3E7	CHMP3	Homo sapiens	Charged multivesicular body protein 3	0.166667	0.166667	0	1.1216	3.47275e-05	Stabilized	54	1	1.08753	1.0283	1.00649	1.02641
Q9Y3E7	CHMP3	Homo sapiens	Charged multivesicular body protein 3	0.166667	0.166667	0	1.1216	3.47275e-05	Stabilized	56	1	0.933295	1.0072	1.00373	0.905129
Q9Y3E7	CHMP3	Homo sapiens	Charged multivesicular body protein 3	0.166667	0.166667	0	1.1216	3.47275e-05	Stabilized	58	1	1.01971	0.954326	1.06791	1.06273
Q9Y3E7	CHMP3	Homo sapiens	Charged multivesicular body protein 3	0.166667	0.166667	0	1.1216	3.47275e-05	Stabilized	60	1	1.18121	1.11152	2.89159	3.04682
Q9Y3E7	CHMP3	Homo sapiens	Charged multivesicular body protein 3	0.166667	0.166667	0	1.1216	3.47275e-05	Stabilized	62	1	0.896686	0.847888	1.91643	2.06798
Q9Y3E7	CHMP3	Homo sapiens	Charged multivesicular body protein 3	0.166667	0.166667	0	1.1216	3.47275e-05	Stabilized	64	1	0.887446	0.966885	1.5843	1.83167
O14972	DSCR3	Homo sapiens	Down syndrome critical region protein 3	0.166667	0.166667	0	1.11812	3.47275e-05	Stabilized	42	1	0.967293	1.00959	1.03713	0.998542
O14972	DSCR3	Homo sapiens	Down syndrome critical region protein 3	0.166667	0.166667	0	1.11812	3.47275e-05	Stabilized	44	1	0.997067	1.00564	0.979205	0.99835
O14972	DSCR3	Homo sapiens	Down syndrome critical region protein 3	0.166667	0.166667	0	1.11812	3.47275e-05	Stabilized	46	1	1.00188	1.0166	1.02851	0.969566
O14972	DSCR3	Homo sapiens	Down syndrome critical region protein 3	0.166667	0.166667	0	1.11812	3.47275e-05	Stabilized	48	1	0.94599	1.00439	1.09787	1.05036
O14972	DSCR3	Homo sapiens	Down syndrome critical region protein 3	0.166667	0.166667	0	1.11812	3.47275e-05	Stabilized	50	1	0.996361	0.994226	1.01352	0.9109
O14972	DSCR3	Homo sapiens	Down syndrome critical region protein 3	0.166667	0.166667	0	1.11812	3.47275e-05	Stabilized	52	1	0.928612	0.927707	0.996345	0.852057
O14972	DSCR3	Homo sapiens	Down syndrome critical region protein 3	0.166667	0.166667	0	1.11812	3.47275e-05	Stabilized	54	1	1.10128	1.17074	0.987649	1.19276
[truncated: 90,929 more rows]

## Sheet: Replication stress proteins
Accession	Gene	Organism	Description	Score	Mean FC	P Value	Effect	Temperature	0	10	50	100	500				Gene
P12004	PCNA	Homo sapiens	Proliferating cell nuclear antigen	0.283333	1.11311	1.96598e-12	Stabilized	42	1	1.81356	0.881457	0.968132	1.49427				PCNA
P12004	PCNA	Homo sapiens	Proliferating cell nuclear antigen	0.283333	1.11311	1.96598e-12	Stabilized	44	1	2.06861	1.09873	1.09646	1.82907				NAP1L1
P12004	PCNA	Homo sapiens	Proliferating cell nuclear antigen	0.283333	1.11311	1.96598e-12	Stabilized	46	1	1.46012	1.02274	1.0063	1.5109				PPP2R1A
P12004	PCNA	Homo sapiens	Proliferating cell nuclear antigen	0.283333	1.11311	1.96598e-12	Stabilized	48	1	1.36001	1.03535	0.97034	1.17746				GINS4
P12004	PCNA	Homo sapiens	Proliferating cell nuclear antigen	0.283333	1.11311	1.96598e-12	Stabilized	50	1	1.21591	1.17619	1.14296	1.27177				CDC45
P12004	PCNA	Homo sapiens	Proliferating cell nuclear antigen	0.283333	1.11311	1.96598e-12	Stabilized	52	1	1.03943	1.04373	0.991177	1.069				CACYBP
P12004	PCNA	Homo sapiens	Proliferating cell nuclear antigen	0.283333	1.11311	1.96598e-12	Stabilized	54	1	0.987128	1.0568	0.884914	1.01769				DUT
P12004	PCNA	Homo sapiens	Proliferating cell nuclear antigen	0.283333	1.11311	1.96598e-12	Stabilized	56	1	1.02269	1.07055	0.992406	1.06437				RPA3
P12004	PCNA	Homo sapiens	Proliferating cell nuclear antigen	0.283333	1.11311	1.96598e-12	Stabilized	58	1	1.00546	1.06651	0.879347	0.997464				ORC2
P12004	PCNA	Homo sapiens	Proliferating cell nuclear antigen	0.283333	1.11311	1.96598e-12	Stabilized	60	1	0.98208	1.04641	0.863483	1.00309				TOP1
P12004	PCNA	Homo sapiens	Proliferating cell nuclear antigen	0.283333	1.11311	1.96598e-12	Stabilized	62	1	1.24409	1.18018	1.10017	1.18937				PNKP
P12004	PCNA	Homo sapiens	Proliferating cell nuclear antigen	0.283333	1.11311	1.96598e-12	Stabilized	64	1	1.05997	1.1023	1.07451	1.15201				RBBP7
																	MGME1
P55209	NAP1L1	Homo sapiens	Nucleosome assembly protein 1-like 1	0.216667	1.16814	7.38956e-08	Stabilized	42	1	1.00612	0.952876	0.989159	0.984227				FAF1
P55209	NAP1L1	Homo sapiens	Nucleosome assembly protein 1-like 1	0.216667	1.16814	7.38956e-08	Stabilized	44	1	1.00954	0.974367	1.02915	0.994255				LIG4
P55209	NAP1L1	Homo sapiens	Nucleosome assembly protein 1-like 1	0.216667	1.16814	7.38956e-08	Stabilized	46	1	1.05592	0.874425	1.11332	1.11152				RFC5
P55209	NAP1L1	Homo sapiens	Nucleosome assembly protein 1-like 1	0.216667	1.16814	7.38956e-08	Stabilized	48	1	0.975306	1.0135	1.00516	1.0027				SAMHD1
P55209	NAP1L1	Homo sapiens	Nucleosome assembly protein 1-like 1	0.216667	1.16814	7.38956e-08	Stabilized	50	1	0.985435	0.947463	0.928144	0.957573				RFC3
P55209	NAP1L1	Homo sapiens	Nucleosome assembly protein 1-like 1	0.216667	1.16814	7.38956e-08	Stabilized	52	1	0.942768	0.867269	0.88351	0.891882				RAD50
P55209	NAP1L1	Homo sapiens	Nucleosome assembly protein 1-like 1	0.216667	1.16814	7.38956e-08	Stabilized	54	1	0.993703	0.932702	1.08118	1.14408				POLE
P55209	NAP1L1	Homo sapiens	Nucleosome assembly protein 1-like 1	0.216667	1.16814	7.38956e-08	Stabilized	56	1	0.86699	0.907678	1.00944	1.07452				RRM1
P55209	NAP1L1	Homo sapiens	Nucleosome assembly protein 1-like 1	0.216667	1.16814	7.38956e-08	Stabilized	58	1	1.01832	0.882546	1.38174	1.38619				CDK1
P55209	NAP1L1	Homo sapiens	Nucleosome assembly protein 1-like 1	0.216667	1.16814	7.38956e-08	Stabilized	60	1	1.08159	1.155	1.93061	2.06908				RPA1
P55209	NAP1L1	Homo sapiens	Nucleosome assembly protein 1-like 1	0.216667	1.16814	7.38956e-08	Stabilized	62	1	1.16792	1.06767	2.7253	3.13848				RNF219
P55209	NAP1L1	Homo sapiens	Nucleosome assembly protein 1-like 1	0.216667	1.16814	7.38956e-08	Stabilized	64	1	0.9903	1.04333	2.6023	2.94222				TIMELESS
																	MRE11
P30153	PPP2R1A	Homo sapiens	Serine/threonine-protein phosphatase 2A 65 kDa regulatory subunit A alpha isoform	0.133333	1.11599	0.000925911	Stabilized	42	1	1.1532	0.993974	1.17874	1.14509				SIN3A
P30153	PPP2R1A	Homo sapiens	Serine/threonine-protein phosphatase 2A 65 kDa regulatory subunit A alpha isoform	0.133333	1.11599	0.000925911	Stabilized	44	1	1.07819	0.977934	1.07946	1.03974				HUS1
P30153	PPP2R1A	Homo sapiens	Serine/threonine-protein phosphatase 2A 65 kDa regulatory subunit A alpha isoform	0.133333	1.11599	0.000925911	Stabilized	46	1	1.28253	1.02677	1.14915	1.19646				ATRIP
P30153	PPP2R1A	Homo sapiens	Serine/threonine-protein phosphatase 2A 65 kDa regulatory subunit A alpha isoform	0.133333	1.11599	0.000925911	Stabilized	48	1	1.16593	1.07609	1.10027	1.07064				ZBTB38
P30153	PPP2R1A	Homo sapiens	Serine/threonine-protein phosphatase 2A 65 kDa regulatory subunit A alpha isoform	0.133333	1.11599	0.000925911	Stabilized	50	1	1.20556	1.15099	1.16576	1.16998				POLE3
P30153	PPP2R1A	Homo sapiens	Serine/threonine-protein phosphatase 2A 65 kDa regulatory subunit A alpha isoform	0.133333	1.11599	0.000925911	Stabilized	52	1	1.03484	1.08788	1.08916	1.05068				POLD4
P30153	PPP2R1A	Homo sapiens	Serine/threonine-protein phosphatase 2A 65 kDa regulatory subunit A alpha isoform	0.133333	1.11599	0.000925911	Stabilized	54	1	0.998125	1.01542	0.942285	0.92158				ORC6
P30153	PPP2R1A	Homo sapiens	Serine/threonine-protein phosphatase 2A 65 kDa regulatory subunit A alpha isoform	0.133333	1.11599	0.000925911	Stabilized	56	1	0.928629	1.02898	0.89213	0.855163				SMC3
P30153	PPP2R1A	Homo sapiens	Serine/threonine-protein phosphatase 2A 65 kDa regulatory subunit A alpha isoform	0.133333	1.11599	0.000925911	Stabilized	58	1	1.0903	0.927053	1.08063	1.14959				WRN
P30153	PPP2R1A	Homo sapiens	Serine/threonine-protein phosphatase 2A 65 kDa regulatory subunit A alpha isoform	0.133333	1.11599	0.000925911	Stabilized	60	1	0.898823	0.892974	1.39594	1.51149				POLE4
P30153	PPP2R1A	Homo sapiens	Serine/threonine-protein phosphatase 2A 65 kDa regulatory subunit A alpha isoform	0.133333	1.11599	0.000925911	Stabilized	62	1	1.16668	0.867981	1.9436	2.22414				NBN
P30153	PPP2R1A	Homo sapiens	Serine/threonine-protein phosphatase 2A 65 kDa regulatory subunit A alpha isoform	0.133333	1.11599	0.000925911	Stabilized	64	1	1.06224	0.92842	1.75394	1.8144				GLI2
																	CHEK1
Q9BRT9	GINS4	Homo sapiens	DNA replication complex GINS protein SLD5	0.116667	1.07194	0.00375239	Stabilized	42	1	0.991208	0.960647	0.959356	1.03145				KAT7
Q9BRT9	GINS4	Homo sapiens	DNA replication complex GINS protein SLD5	0.116667	1.07194	0.00375239	Stabilized	44	1	1.0171	1.0103	0.961447	1.08218				CINP
Q9BRT9	GINS4	Homo sapiens	DNA replication complex GINS protein SLD5	0.116667	1.07194	0.00375239	Stabilized	46	1	0.99177	0.995001	1.00659	1.03082				CDK9
Q9BRT9	GINS4	Homo sapiens	DNA replication complex GINS protein SLD5	0.116667	1.07194	0.00375239	Stabilized	48	1	1.04567	1.03268	0.939149	1.03894				RTFDC1
Q9BRT9	GINS4	Homo sapiens	DNA replication complex GINS protein SLD5	0.116667	1.07194	0.00375239	Stabilized	50	1	1.03404	1.0035	0.993978	1.06052				BAZ1A
Q9BRT9	GINS4	Homo sapiens	DNA replication complex GINS protein SLD5	0.116667	1.07194	0.00375239	Stabilized	52	1	1.13808	1.01498	1.02099	1.14953				GINS3
Q9BRT9	GINS4	Homo sapiens	DNA replication complex GINS protein SLD5	0.116667	1.07194	0.00375239	Stabilized	54	1	0.934677	0.896167	0.999952	1.05619				PRIM2
Q9BRT9	GINS4	Homo sapiens	DNA replication complex GINS protein SLD5	0.116667	1.07194	0.00375239	Stabilized	56	1	1.06489	0.990227	1.13159	1.31583				POLB
Q9BRT9	GINS4	Homo sapiens	DNA replication complex GINS protein SLD5	0.116667	1.07194	0.00375239	Stabilized	58	1	0.928683	1.01602	1.17439	1.27783				DNA2
Q9BRT9	GINS4	Homo sapiens	DNA replication complex GINS protein SLD5	0.116667	1.07194	0.00375239	Stabilized	60	1	0.903257	0.913184	1.03	1.16931				SDE2
Q9BRT9	GINS4	Homo sapiens	DNA replication complex GINS protein SLD5	0.116667	1.07194	0.00375239	Stabilized	62	1	1.10139	1.0223	1.81022	2.23193				KAT5
Q9BRT9	GINS4	Homo sapiens	DNA replication complex GINS protein SLD5	0.116667	1.07194	0.00375239	Stabilized	64	1	0.944285	0.876918	1.53081	1.48668				TOPBP1
																	RPA2
O75419-3	CDC45	Homo sapiens	Isoform 3 of Cell division control protein 45 homolog	0.0166667	1.04349	0.678077	Stabilized	42	1	0.914989	0.909744	0.890029	0.878559				PDS5A
O75419-3	CDC45	Homo sapiens	Isoform 3 of Cell division control protein 45 homolog	0.0166667	1.04349	0.678077	Stabilized	44	1	0.92024	0.908867	1.02668	0.939005				ORC3
O75419-3	CDC45	Homo sapiens	Isoform 3 of Cell division control protein 45 homolog	0.0166667	1.04349	0.678077	Stabilized	46	1	0.969623	0.924675	0.933077	0.861915				ATR
O75419-3	CDC45	Homo sapiens	Isoform 3 of Cell division control protein 45 homolog	0.0166667	1.04349	0.678077	Stabilized	48	NaN	NaN	NaN	NaN	NaN				PURA
O75419-3	CDC45	Homo sapiens	Isoform 3 of Cell division control protein 45 homolog	0.0166667	1.04349	0.678077	Stabilized	50	NaN	NaN	NaN	NaN	NaN				ZMPSTE24
O75419-3	CDC45	Homo sapiens	Isoform 3 of Cell division control protein 45 homolog	0.0166667	1.04349	0.678077	Stabilized	52	NaN	NaN	NaN	NaN	NaN				ZNF830
O75419-3	CDC45	Homo sapiens	Isoform 3 of Cell division control protein 45 homolog	0.0166667	1.04349	0.678077	Stabilized	54	NaN	NaN	NaN	NaN	NaN				POLE2
O75419-3	CDC45	Homo sapiens	Isoform 3 of Cell division control protein 45 homolog	0.0166667	1.04349	0.678077	Stabilized	56	NaN	NaN	NaN	NaN	NaN				EGFR
O75419-3	CDC45	Homo sapiens	Isoform 3 of Cell division control protein 45 homolog	0.0166667	1.04349	0.678077	Stabilized	58	1	1.95739	1.97371	2.49292	1.7398				LRWD1
O75419-3	CDC45	Homo sapiens	Isoform 3 of Cell division control protein 45 homolog	0.0166667	1.04349	0.678077	Stabilized	60	NaN	NaN	NaN	NaN	NaN				ORC4
O75419-3	CDC45	Homo sapiens	Isoform 3 of Cell division control protein 45 homolog	0.0166667	1.04349	0.678077	Stabilized	62	1	0.751794	0.827714	0.927558	0.861021				UPF1
O75419-3	CDC45	Homo sapiens	Isoform 3 of Cell division control protein 45 homolog	0.0166667	1.04349	0.678077	Stabilized	64	NaN	NaN	NaN	NaN	NaN				POLG
																	DTL
Q9HB71	CACYBP	Homo sapiens	Calcyclin-binding protein	0	1.18945	0.999022	Stabilized	42	1	1.57399	0.977477	1.22148	1.39102				RBBP4
Q9HB71	CACYBP	Homo sapiens	Calcyclin-binding protein	0	1.18945	0.999022	Stabilized	44	1	1.7845	0.91901	1.25288	1.39908				TERF2
Q9HB71	CACYBP	Homo sapiens	Calcyclin-binding protein	0	1.18945	0.999022	Stabilized	46	1	1.63292	0.992832	1.32016	1.41188				DSCC1
Q9HB71	CACYBP	Homo sapiens	Calcyclin-binding protein	0	1.18945	0.999022	Stabilized	48	1	1.14101	0.996526	1.05225	1.03721				RBBP6
Q9HB71	CACYBP	Homo sapiens	Calcyclin-binding protein	0	1.18945	0.999022	Stabilized	50	1	1.3101	1.10729	1.25828	1.24266				CCNE1
Q9HB71	CACYBP	Homo sapiens	Calcyclin-binding protein	0	1.18945	0.999022	Stabilized	52	1	1.59254	1.31187	1.41275	1.39152				SSBP1
Q9HB71	CACYBP	Homo sapiens	Calcyclin-binding protein	0	1.18945	0.999022	Stabilized	54	1	1.01406	0.994575	0.947675	1.02943				TIPIN
Q9HB71	CACYBP	Homo sapiens	Calcyclin-binding protein	0	1.18945	0.999022	Stabilized	56	1	0.99965	1.09863	1.01981	1.08963				FBXO5
Q9HB71	CACYBP	Homo sapiens	Calcyclin-binding protein	0	1.18945	0.999022	Stabilized	58	1	1.12965	1.01748	1.11718	1.1614				GINS1
Q9HB71	CACYBP	Homo sapiens	Calcyclin-binding protein	0	1.18945	0.999022	Stabilized	60	1	0.876085	0.9852	1.66069	1.77009				MCM7
Q9HB71	CACYBP	Homo sapiens	Calcyclin-binding protein	0	1.18945	0.999022	Stabilized	62	1	1.20074	0.975548	1.58843	1.60597				MCM5
Q9HB71	CACYBP	Homo sapiens	Calcyclin-binding protein	0	1.18945	0.999022	Stabilized	64	1	1.08645	1.00407	1.63772	1.6256				MCM3
																	NASP
P33316	DUT	Homo sapiens	Deoxyuridine 5'-triphosphate nucleotidohydrolase, mitochondrial	0	1.1116	0.999022	null	42	1	1.38892	0.987956	1.38364	1.34746				CDAN1
P33316	DUT	Homo sapiens	Deoxyuridine 5'-triphosphate nucleotidohydrolase, mitochondrial	0	1.1116	0.999022	null	44	1	1.57713	0.981367	0.977848	1.37628				KIN
P33316	DUT	Homo sapiens	Deoxyuridine 5'-triphosphate nucleotidohydrolase, mitochondrial	0	1.1116	0.999022	null	46	1	1.05007	1.06613	1.02237	1.03694				REPIN1
P33316	DUT	Homo sapiens	Deoxyuridine 5'-triphosphate nucleotidohydrolase, mitochondrial	0	1.1116	0.999022	null	48	1	1.22526	1.08136	1.13797	1.17828				CDC42
P33316	DUT	Homo sapiens	Deoxyuridine 5'-triphosphate nucleotidohydrolase, mitochondrial	0	1.1116	0.999022	null	50	1	1.04618	1.05923	1.11095	1.10447				DNAJA3
P33316	DUT	Homo sapiens	Deoxyuridine 5'-triphosphate nucleotidohydrolase, mitochondrial	0	1.1116	0.999022	null	52	1	1.04271	1.0907	1.18099	1.2726				LIG3
P33316	DUT	Homo sapiens	Deoxyuridine 5'-triphosphate nucleotidohydrolase, mitochondrial	0	1.1116	0.999022	null	54	1	1.03616	1.03734	1.08802	1.17065				STOML2
P33316	DUT	Homo sapiens	Deoxyuridine 5'-triphosphate nucleotidohydrolase, mitochondrial	0	1.1116	0.999022	null	56	1	1.0434	1.20211	1.14985	1.17633				RRM2B
P33316	DUT	Homo sapiens	Deoxyuridine 5'-triphosphate nucleotidohydrolase, mitochondrial	0	1.1116	0.999022	null	58	1	1.13866	1.15285	1.21204	1.26741				DTD1
P33316	DUT	Homo sapiens	Deoxyuridine 5'-triphosphate nucleotidohydrolase, mitochondrial	0	1.1116	0.999022	null	60	1	1.07823	1.16802	1.08618	1.13982				PTMS
P33316	DUT	Homo sapiens	Deoxyuridine 5'-triphosphate nucleotidohydrolase, mitochondrial	0	1.1116	0.999022	null	62	1	1.14385	1.09482	1.04759	1.0939				NFIX
P33316	DUT	Homo sapiens	Deoxyuridine 5'-triphosphate nucleotidohydrolase, mitochondrial	0	1.1116	0.999022	null	64	1	1.0746	1.16023	1.10644	1.10091				HRAS
																	CDC34
P35244	RPA3	Homo sapiens	Replication protein A 14 kDa subunit	0	1.07959	0.999022	Stabilized	42	1	1.0957	1.05787	1.02423	1.10342				PRIM1
P35244	RPA3	Homo sapiens	Replication protein A 14 kDa subunit	0	1.07959	0.999022	Stabilized	44	1	0.989516	0.995041	1.0094	1.00331				WDR18
P35244	RPA3	Homo sapiens	Replication protein A 14 kDa subunit	0	1.07959	0.999022	Stabilized	46	1	0.963239	1.05304	1.02083	0.950814				S100A11
P35244	RPA3	Homo sapiens	Replication protein A 14 kDa subunit	0	1.07959	0.999022	Stabilized	48	1	1.01882	1.03457	1.05158	1.00355				PPP2CA
P35244	RPA3	Homo sapiens	Replication protein A 14 kDa subunit	0	1.07959	0.999022	Stabilized	50	1	1.04356	1.09186	1.04935	1.12916				NUCKS1
P35244	RPA3	Homo sapiens	Replication protein A 14 kDa subunit	0	1.07959	0.999022	Stabilized	52	1	0.978812	1.11873	0.994758	1.11664				CHAF1B
P35244	RPA3	Homo sapiens	Replication protein A 14 kDa subunit	0	1.07959	0.999022	Stabilized	54	1	0.95243	1.1537	0.981519	1.02687				SET
P35244	RPA3	Homo sapiens	Replication protein A 14 kDa subunit	0	1.07959	0.999022	Stabilized	56	1	1.02569	1.04328	0.932866	0.953455				ATM
P35244	RPA3	Homo sapiens	Replication protein A 14 kDa subunit	0	1.07959	0.999022	Stabilized	58	1	0.988157	1.02769	0.917869	0.952189				NFIC
P35244	RPA3	Homo sapiens	Replication protein A 14 kDa subunit	0	1.07959	0.999022	Stabilized	60	1	1.11319	1.10177	1.13816	1.18883				ATF1
P35244	RPA3	Homo sapiens	Replication protein A 14 kDa subunit	0	1.07959	0.999022	Stabilized	62	1	1.51367	1.22831	1.59389	1.67645				SUPT16H
P35244	RPA3	Homo sapiens	Replication protein A 14 kDa subunit	0	1.07959	0.999022	Stabilized	64	1	1.17126	0.988854	1.70713	1.50061				RAD1
																	WRNIP1
Q13416	ORC2	Homo sapiens	Origin recognition complex subunit 2	0	1.07191	0.999022	null	42	1	1.00523	0.969943	1.04713	0.975385				FBH1
Q13416	ORC2	Homo sapiens	Origin recognition complex subunit 2	0	1.07191	0.999022	null	44	1	1.05318	0.972095	1.04872	1.085				GINS2
Q13416	ORC2	Homo sapiens	Origin recognition complex subunit 2	0	1.07191	0.999022	null	46	NaN	NaN	NaN	NaN	NaN				RNASEH2A
Q13416	ORC2	Homo sapiens	Origin recognition complex subunit 2	0	1.07191	0.999022	null	48	NaN	NaN	NaN	NaN	NaN				RFC2
Q13416	ORC2	Homo sapiens	Origin recognition complex subunit 2	0	1.07191	0.999022	null	50	NaN	NaN	NaN	NaN	NaN				ANKRD17
Q13416	ORC2	Homo sapiens	Origin recognition complex subunit 2	0	1.07191	0.999022	null	52	NaN	NaN	NaN	NaN	NaN				RFC1
Q13416	ORC2	Homo sapiens	Origin recognition complex subunit 2	0	1.07191	0.999022	null	54	NaN	NaN	NaN	NaN	NaN				POLA2
Q13416	ORC2	Homo sapiens	Origin recognition complex subunit 2	0	1.07191	0.999022	null	56	NaN	NaN	NaN	NaN	NaN				POLD3
Q13416	ORC2	Homo sapiens	Origin recognition complex subunit 2	0	1.07191	0.999022	null	58	NaN	NaN	NaN	NaN	NaN				CCDC88A
Q13416	ORC2	Homo sapiens	Origin recognition complex subunit 2	0	1.07191	0.999022	null	60	NaN	NaN	NaN	NaN	NaN				POLG2
Q13416	ORC2	Homo sapiens	Origin recognition complex subunit 2	0	1.07191	0.999022	null	62	1	1.57603	0.601912	2.25264	2.81039				CHAF1A
Q13416	ORC2	Homo sapiens	Origin recognition complex subunit 2	0	1.07191	0.999022	null	64	1	0.501496	0.500855	1.60925	2.3051				RAD9A
																	CENPS
P11387	TOP1	Homo sapiens	DNA topoisomerase 1	0	1.06955	0.999022	Stabilized	42	1	1.11447	1.08712	1.08012	1.05176				NFIA
P11387	TOP1	Homo sapiens	DNA topoisomerase 1	0	1.06955	0.999022	Stabilized	44	1	1.03944	1.02972	1.13073	1.00376				EXD2
P11387	TOP1	Homo sapiens	DNA topoisomerase 1	0	1.06955	0.999022	Stabilized	46	1	0.907807	0.90137	0.996777	1.00058				SMARCAL1
P11387	TOP1	Homo sapiens	DNA topoisomerase 1	0	1.06955	0.999022	Stabilized	48	1	1.0388	1.03118	1.02765	1.12916				SSRP1
P11387	TOP1	Homo sapiens	DNA topoisomerase 1	0	1.06955	0.999022	Stabilized	50	NaN	NaN	NaN	NaN	NaN				CDK2AP1
P11387	TOP1	Homo sapiens	DNA topoisomerase 1	0	1.06955	0.999022	Stabilized	52	NaN	NaN	NaN	NaN	NaN				GRWD1
P11387	TOP1	Homo sapiens	DNA topoisomerase 1	0	1.06955	0.999022	Stabilized	54	NaN	NaN	NaN	NaN	NaN				WDHD1
P11387	TOP1	Homo sapiens	DNA topoisomerase 1	0	1.06955	0.999022	Stabilized	56	NaN	NaN	NaN	NaN	NaN				ZPR1
P11387	TOP1	Homo sapiens	DNA topoisomerase 1	0	1.06955	0.999022	Stabilized	58	1	1.05811	1.06102	1.19171	1.23239				RBMS1
P11387	TOP1	Homo sapiens	DNA topoisomerase 1	0	1.06955	0.999022	Stabilized	60	1	0.904775	1.00814	1.34527	1.48908				MSH3
P11387	TOP1	Homo sapiens	DNA topoisomerase 1	0	1.06955	0.999022	Stabilized	62	1	1.05451	1.033	1.41911	1.5657				WAPL
P11387	TOP1	Homo sapiens	DNA topoisomerase 1	0	1.06955	0.999022	Stabilized	64	1	1.01693	0.959179	1.59876	1.66513				TREX1
																	MCMBP
Q96T60	PNKP	Homo sapiens	Bifunctional polynucleotide phosphatase/kinase	0	1.06615	0.999022	Stabilized	42	1	1.03254	1.0364	0.997986	1.04988				CENPX
Q96T60	PNKP	Homo sapiens	Bifunctional polynucleotide phosphatase/kinase	0	1.06615	0.999022	Stabilized	44	1	1.0549	1.02029	1.05417	1.08094				RECQL4
Q96T60	PNKP	Homo sapiens	Bifunctional polynucleotide phosphatase/kinase	0	1.06615	0.999022	Stabilized	46	1	0.883721	0.917516	1.02648	1.032				LIG1
Q96T60	PNKP	Homo sapiens	Bifunctional polynucleotide phosphatase/kinase	0	1.06615	0.999022	Stabilized	48	NaN	NaN	NaN	NaN	NaN				DNAJC2
Q96T60	PNKP	Homo sapiens	Bifunctional polynucleotide phosphatase/kinase	0	1.06615	0.999022	Stabilized	50	NaN	NaN	NaN	NaN	NaN				GMNN
Q96T60	PNKP	Homo sapiens	Bifunctional polynucleotide phosphatase/kinase	0	1.06615	0.999022	Stabilized	52	NaN	NaN	NaN	NaN	NaN				FEN1
Q96T60	PNKP	Homo sapiens	Bifunctional polynucleotide phosphatase/kinase	0	1.06615	0.999022	Stabilized	54	NaN	NaN	NaN	NaN	NaN				BOD1L1
Q96T60	PNKP	Homo sapiens	Bifunctional polynucleotide phosphatase/kinase	0	1.06615	0.999022	Stabilized	56	NaN	NaN	NaN	NaN	NaN				MCM2
Q96T60	PNKP	Homo sapiens	Bifunctional polynucleotide phosphatase/kinase	0	1.06615	0.999022	Stabilized	58	1	1.27924	1.04939	1.1635	1.21994				RAC1
Q96T60	PNKP	Homo sapiens	Bifunctional polynucleotide phosphatase/kinase	0	1.06615	0.999022	Stabilized	60	NaN	NaN	NaN	NaN	NaN				ORC5
Q96T60	PNKP	Homo sapiens	Bifunctional polynucleotide phosphatase/kinase	0	1.06615	0.999022	Stabilized	62	1	1.15586	0.901687	1.17553	1.68699				CCNA2
Q96T60	PNKP	Homo sapiens	Bifunctional polynucleotide phosphatase/kinase	0	1.06615	0.999022	Stabilized	64	1	1.70254	0.988966	1.55198	1.90636				RRM2
																	HMGA1
Q16576	RBBP7	Homo sapiens	Histone-binding protein RBBP7	0	1.05627	0.999022	Stabilized	42	1	1.07541	1.12987	1.08379	1.12426				DHX9
Q16576	RBBP7	Homo sapiens	Histone-binding protein RBBP7	0	1.05627	0.999022	Stabilized	44	1	1.01104	1.01847	1.03789	0.94839				ATG7
Q16576	RBBP7	Homo sapiens	Histone-binding protein RBBP7	0	1.05627	0.999022	Stabilized	46	1	1.00708	1.0345	1.0155	0.969873				RECQL
Q16576	RBBP7	Homo sapiens	Histone-binding protein RBBP7	0	1.05627	0.999022	Stabilized	48	1	0.996698	1.01621	0.967112	0.924502				CHEK2
Q16576	RBBP7	Homo sapiens	Histone-binding protein RBBP7	0	1.05627	0.999022	Stabilized	50	1	1.01868	1.00586	0.996583	0.978011				PCLAF
Q16576	RBBP7	Homo sapiens	Histone-binding protein RBBP7	0	1.05627	0.999022	Stabilized	52	1	0.995964	1.06992	1.005	1.00643				MAP2K4
Q16576	RBBP7	Homo sapiens	Histone-binding protein RBBP7	0	1.05627	0.999022	Stabilized	54	1	0.988367	1.04959	0.996047	1.01624				MCM6
Q16576	RBBP7	Homo sapiens	Histone-binding protein RBBP7	0	1.05627	0.999022	Stabilized	56	1	1.02318	1.08522	0.986683	0.980257				MCM4
Q16576	RBBP7	Homo sapiens	Histone-binding protein RBBP7	0	1.05627	0.999022	Stabilized	58	1	1.07852	1.0675	1.05343	1.0268				RFC4
Q16576	RBBP7	Homo sapiens	Histone-binding protein RBBP7	0	1.05627	0.999022	Stabilized	60	1	0.952053	0.947937	1.19699	1.46848				JUN
Q16576	RBBP7	Homo sapiens	Histone-binding protein RBBP7	0	1.05627	0.999022	Stabilized	62	1	1.19769	1.07134	1.26426	1.65721
Q16576	RBBP7	Homo sapiens	Histone-binding protein RBBP7	0	1.05627	0.999022	Stabilized	64	1	1.05932	1.23875	1.17478	1.35829
Q9BQP7	MGME1	Homo sapiens	Mitochondrial genome maintenance exonuclease 1	0	1.04362	0.999022	null	42	1	1.01887	1.04962	1.00487	1.03816
Q9BQP7	MGME1	Homo sapiens	Mitochondrial genome maintenance exonuclease 1	0	1.04362	0.999022	null	44	1	0.994331	1.0164	0.97261	1.02841
Q9BQP7	MGME1	Homo sapiens	Mitochondrial genome maintenance exonuclease 1	0	1.04362	0.999022	null	46	1	1.00824	1.01298	0.981351	1.01973
Q9BQP7	MGME1	Homo sapiens	Mitochondrial genome maintenance exonuclease 1	0	1.04362	0.999022	null	48	1	1.02221	1.0187	0.986217	1.01061
Q9BQP7	MGME1	Homo sapiens	Mitochondrial genome maintenance exonuclease 1	0	1.04362	0.999022	null	50	1	0.991956	1.00001	0.985172	1.05174
Q9BQP7	MGME1	Homo sapiens	Mitochondrial genome maintenance exonuclease 1	0	1.04362	0.999022	null	52	1	1.01325	1.0138	0.967598	1.04145
Q9BQP7	MGME1	Homo sapiens	Mitochondrial genome maintenance exonuclease 1	0	1.04362	0.999022	null	54	1	1.02702	1.0442	0.952213	1.07626
Q9BQP7	MGME1	Homo sapiens	Mitochondrial genome maintenance exonuclease 1	0	1.04362	0.999022	null	56	1	1.05701	1.0675	1.04049	1.15774
Q9BQP7	MGME1	Homo sapiens	Mitochondrial genome maintenance exonuclease 1	0	1.04362	0.999022	null	58	1	1.14891	1.03969	1.11388	1.19542
Q9BQP7	MGME1	Homo sapiens	Mitochondrial genome maintenance exonuclease 1	0	1.04362	0.999022	null	60	1	0.933402	0.909898	1.05938	1.10193
Q9BQP7	MGME1	Homo sapiens	Mitochondrial genome maintenance exonuclease 1	0	1.04362	0.999022	null	62	1	1.15398	1.01265	1.36332	1.37148
Q9BQP7	MGME1	Homo sapiens	Mitochondrial genome maintenance exonuclease 1	0	1.04362	0.999022	null	64	1	1.06212	0.848862	1.29168	1.33958
Q9UNN5	FAF1	Homo sapiens	FAS-associated factor 1	0	1.03985	0.999022	Stabilized	42	1	1.04638	1.0184	1.05716	1.08579
Q9UNN5	FAF1	Homo sapiens	FAS-associated factor 1	0	1.03985	0.999022	Stabilized	44	1	0.976279	0.982452	1.03213	1.04313
Q9UNN5	FAF1	Homo sapiens	FAS-associated factor 1	0	1.03985	0.999022	Stabilized	46	1	1.00284	1.00489	1.02949	1.00622
Q9UNN5	FAF1	Homo sapiens	FAS-associated factor 1	0	1.03985	0.999022	Stabilized	48	1	1.00068	0.987038	1.00391	0.97857
Q9UNN5	FAF1	Homo sapiens	FAS-associated factor 1	0	1.03985	0.999022	Stabilized	50	1	1.02935	1.03509	1.04445	0.996264
Q9UNN5	FAF1	Homo sapiens	FAS-associated factor 1	0	1.03985	0.999022	Stabilized	52	1	1.02626	1.03239	1.02196	0.9964
Q9UNN5	FAF1	Homo sapiens	FAS-associated factor 1	0	1.03985	0.999022	Stabilized	54	1	1.00008	1.03457	0.968033	0.905303
Q9UNN5	FAF1	Homo sapiens	FAS-associated factor 1	0	1.03985	0.999022	Stabilized	56	1	0.97985	0.999223	0.934361	0.927168
Q9UNN5	FAF1	Homo sapiens	FAS-associated factor 1	0	1.03985	0.999022	Stabilized	58	1	1.06811	1.05022	0.997272	1.03206
Q9UNN5	FAF1	Homo sapiens	FAS-associated factor 1	0	1.03985	0.999022	Stabilized	60	1	1.03091	1.02917	1.07137	1.16727
Q9UNN5	FAF1	Homo sapiens	FAS-associated factor 1	0	1.03985	0.999022	Stabilized	62	1	1.14875	0.874458	1.47635	1.67036
Q9UNN5	FAF1	Homo sapiens	FAS-associated factor 1	0	1.03985	0.999022	Stabilized	64	1	0.85759	0.980834	1.38234	1.36773
P49917	LIG4	Homo sapiens	DNA ligase 4	0	1.03742	0.999022	null	42	NaN	NaN	NaN	NaN	NaN
P49917	LIG4	Homo sapiens	DNA ligase 4	0	1.03742	0.999022	null	44	1	1.17211	1.10689	1.10666	1.11507
P49917	LIG4	Homo sapiens	DNA ligase 4	0	1.03742	0.999022	null	46	NaN	NaN	NaN	NaN	NaN
P49917	LIG4	Homo sapiens	DNA ligase 4	0	1.03742	0.999022	null	48	NaN	NaN	NaN	NaN	NaN
P49917	LIG4	Homo sapiens	DNA ligase 4	0	1.03742	0.999022	null	50	NaN	NaN	NaN	NaN	NaN
P49917	LIG4	Homo sapiens	DNA ligase 4	0	1.03742	0.999022	null	52	NaN	NaN	NaN	NaN	NaN
P49917	LIG4	Homo sapiens	DNA ligase 4	0	1.03742	0.999022	null	54	NaN	NaN	NaN	NaN	NaN
P49917	LIG4	Homo sapiens	DNA ligase 4	0	1.03742	0.999022	null	56	NaN	NaN	NaN	NaN	NaN
P49917	LIG4	Homo sapiens	DNA ligase 4	0	1.03742	0.999022	null	58	NaN	NaN	NaN	NaN	NaN
P49917	LIG4	Homo sapiens	DNA ligase 4	0	1.03742	0.999022	null	60	NaN	NaN	NaN	NaN	NaN
P49917	LIG4	Homo sapiens	DNA ligase 4	0	1.03742	0.999022	null	62	NaN	NaN	NaN	NaN	NaN
P49917	LIG4	Homo sapiens	DNA ligase 4	0	1.03742	0.999022	null	64	1	1.27464	1.38304	1.45517	1.63153
P40937	RFC5	Homo sapiens	Replication factor C subunit 5	0	1.02729	0.999022	null	42	1	1.02378	0.977092	1.02731	1.04105
P40937	RFC5	Homo sapiens	Replication factor C subunit 5	0	1.02729	0.999022	null	44	1	0.956425	0.94478	0.998648	0.976358
P40937	RFC5	Homo sapiens	Replication factor C subunit 5	0	1.02729	0.999022	null	46	1	0.980471	0.986614	0.988663	1.01632
P40937	RFC5	Homo sapiens	Replication factor C subunit 5	0	1.02729	0.999022	null	48	1	0.964872	0.961983	1.0001	1.0542
P40937	RFC5	Homo sapiens	Replication factor C subunit 5	0	1.02729	0.999022	null	50	1	0.91719	0.947271	0.941254	0.976071
P40937	RFC5	Homo sapiens	Replication factor C subunit 5	0	1.02729	0.999022	null	52	1	0.929002	0.971263	1.09991	1.1819
P40937	RFC5	Homo sapiens	Replication factor C subunit 5	0	1.02729	0.999022	null	54	1	0.979033	0.854422	1.16453	1.15443
P40937	RFC5	Homo sapiens	Replication factor C subunit 5	0	1.02729	0.999022	null	56	1	0.974366	1.1029	0.999514	0.973245
P40937	RFC5	Homo sapiens	Replication factor C subunit 5	0	1.02729	0.999022	null	58	1	1.12313	1.02797	1.25041	1.30849
P40937	RFC5	Homo sapiens	Replication factor C subunit 5	0	1.02729	0.999022	null	60	1	0.921869	0.912785	1.09394	1.14199
P40937	RFC5	Homo sapiens	Replication factor C subunit 5	0	1.02729	0.999022	null	62	1	1.03879	1.03294	1.08995	1.16978
P40937	RFC5	Homo sapiens	Replication factor C subunit 5	0	1.02729	0.999022	null	64	1	1.06513	1.01544	1.20107	1.17866
Q9Y3Z3	SAMHD1	Homo sapiens	Deoxynucleoside triphosphate triphosphohydrolase SAMHD1	0	1.02713	0.999022	null	42	1	1.03415	1.04608	1.06733	1.03126
Q9Y3Z3	SAMHD1	Homo sapiens	Deoxynucleoside triphosphate triphosphohydrolase SAMHD1	0	1.02713	0.999022	null	44	1	1.02258	1.02675	1.01319	0.957517
Q9Y3Z3	SAMHD1	Homo sapiens	Deoxynucleoside triphosphate triphosphohydrolase SAMHD1	0	1.02713	0.999022	null	46	1	0.969156	0.970149	0.959723	1.08918
Q9Y3Z3	SAMHD1	Homo sapiens	Deoxynucleoside triphosphate triphosphohydrolase SAMHD1	0	1.02713	0.999022	null	48	1	0.967095	1.00769	1.00414	1.0423
Q9Y3Z3	SAMHD1	Homo sapiens	Deoxynucleoside triphosphate triphosphohydrolase SAMHD1	0	1.02713	0.999022	null	50	1	0.973715	1.01674	1.03386	1.02151
Q9Y3Z3	SAMHD1	Homo sapiens	Deoxynucleoside triphosphate triphosphohydrolase SAMHD1	0	1.02713	0.999022	null	52	1	0.972622	1.03752	1.06086	1.1259
Q9Y3Z3	SAMHD1	Homo sapiens	Deoxynucleoside triphosphate triphosphohydrolase SAMHD1	0	1.02713	0.999022	null	54	1	0.99965	1.03679	1.11322	1.10127
Q9Y3Z3	SAMHD1	Homo sapiens	Deoxynucleoside triphosphate triphosphohydrolase SAMHD1	0	1.02713	0.999022	null	56	1	1.06173	1.0736	1.0702	1.22488
Q9Y3Z3	SAMHD1	Homo sapiens	Deoxynucleoside triphosphate triphosphohydrolase SAMHD1	0	1.02713	0.999022	null	58	1	0.922047	0.994885	0.973107	1.03116
Q9Y3Z3	SAMHD1	Homo sapiens	Deoxynucleoside triphosphate triphosphohydrolase SAMHD1	0	1.02713	0.999022	null	60	1	0.935102	0.98242	0.982718	1.05852
Q9Y3Z3	SAMHD1	Homo sapiens	Deoxynucleoside triphosphate triphosphohydrolase SAMHD1	0	1.02713	0.999022	null	62	1	1.21522	1.06519	1.08995	1.1296
Q9Y3Z3	SAMHD1	Homo sapiens	Deoxynucleoside triphosphate triphosphohydrolase SAMHD1	0	1.02713	0.999022	null	64	1	0.968424	0.905483	1.12684	1.11471
P40938	RFC3	Homo sapiens	Replication factor C subunit 3	0	1.02579	0.999022	null	42	1	1.05077	1.01214	1.04347	1.08965
P40938	RFC3	Homo sapiens	Replication factor C subunit 3	0	1.02579	0.999022	null	44	1	1.02217	1.01239	1.07687	1.04369
P40938	RFC3	Homo sapiens	Replication factor C subunit 3	0	1.02579	0.999022	null	46	1	0.965536	0.98689	1.01252	1.08316
P40938	RFC3	Homo sapiens	Replication factor C subunit 3	0	1.02579	0.999022	null	48	1	0.962605	0.970476	0.989327	1.06847
P40938	RFC3	Homo sapiens	Replication factor C subunit 3	0	1.02579	0.999022	null	50	1	0.995581	0.938541	0.95849	0.978839
P40938	RFC3	Homo sapiens	Replication factor C subunit 3	0	1.02579	0.999022	null	52	1	0.984915	0.936076	0.938992	1.15613
P40938	RFC3	Homo sapiens	Replication factor C subunit 3	0	1.02579	0.999022	null	54	1	1.09696	1.10652	1.10479	1.14482
P40938	RFC3	Homo sapiens	Replication factor C subunit 3	0	1.02579	0.999022	null	56	1	0.876581	0.970189	0.939106	0.960835
P40938	RFC3	Homo sapiens	Replication factor C subunit 3	0	1.02579	0.999022	null	58	1	1.06216	1.00173	1.04534	1.06969
P40938	RFC3	Homo sapiens	Replication factor C subunit 3	0	1.02579	0.999022	null	60	1	0.934222	0.905711	1.03362	1.11688
P40938	RFC3	Homo sapiens	Replication factor C subunit 3	0	1.02579	0.999022	null	62	1	1.07708	0.991636	1.18858	1.19301
P40938	RFC3	Homo sapiens	Replication factor C subunit 3	0	1.02579	0.999022	null	64	1	1.032	0.922311	1.23771	1.25807
Q92878-3	RAD50	Homo sapiens	Isoform 3 of DNA repair protein RAD50	0	1.01992	0.999022	null	42	NaN	NaN	NaN	NaN	NaN
Q92878-3	RAD50	Homo sapiens	Isoform 3 of DNA repair protein RAD50	0	1.01992	0.999022	null	44	1	1.05463	1.05879	1.01349	1.08878
Q92878-3	RAD50	Homo sapiens	Isoform 3 of DNA repair protein RAD50	0	1.01992	0.999022	null	46	NaN	NaN	NaN	NaN	NaN
Q92878-3	RAD50	Homo sapiens	Isoform 3 of DNA repair protein RAD50	0	1.01992	0.999022	null	48	NaN	NaN	NaN	NaN	NaN
Q92878-3	RAD50	Homo sapiens	Isoform 3 of DNA repair protein RAD50	0	1.01992	0.999022	null	50	NaN	NaN	NaN	NaN	NaN
Q92878-3	RAD50	Homo sapiens	Isoform 3 of DNA repair protein RAD50	0	1.01992	0.999022	null	52	NaN	NaN	NaN	NaN	NaN
Q92878-3	RAD50	Homo sapiens	Isoform 3 of DNA repair protein RAD50	0	1.01992	0.999022	null	54	NaN	NaN	NaN	NaN	NaN
Q92878-3	RAD50	Homo sapiens	Isoform 3 of DNA repair protein RAD50	0	1.01992	0.999022	null	56	NaN	NaN	NaN	NaN	NaN
Q92878-3	RAD50	Homo sapiens	Isoform 3 of DNA repair protein RAD50	0	1.01992	0.999022	null	58	NaN	NaN	NaN	NaN	NaN
Q92878-3	RAD50	Homo sapiens	Isoform 3 of DNA repair protein RAD50	0	1.01992	0.999022	null	60	NaN	NaN	NaN	NaN	NaN
Q92878-3	RAD50	Homo sapiens	Isoform 3 of DNA repair protein RAD50	0	1.01992	0.999022	null	62	NaN	NaN	NaN	NaN	NaN
Q92878-3	RAD50	Homo sapiens	Isoform 3 of DNA repair protein RAD50	0	1.01992	0.999022	null	64	1	1.13596	1.42354	1.12565	1.29456
Q07864	POLE	Homo sapiens	DNA polymerase epsilon catalytic subunit A	0	1.01465	0.999022	null	42	1	1.01404	0.991103	0.950301	1.0445
Q07864	POLE	Homo sapiens	DNA polymerase epsilon catalytic subunit A	0	1.01465	0.999022	null	44	1	1.02401	1.02114	1.03109	1.03488
Q07864	POLE	Homo sapiens	DNA polymerase epsilon catalytic subunit A	0	1.01465	0.999022	null	46	NaN	NaN	NaN	NaN	NaN
Q07864	POLE	Homo sapiens	DNA polymerase epsilon catalytic subunit A	0	1.01465	0.999022	null	48	NaN	NaN	NaN	NaN	NaN
Q07864	POLE	Homo sapiens	DNA polymerase epsilon catalytic subunit A	0	1.01465	0.999022	null	50	NaN	NaN	NaN	NaN	NaN
Q07864	POLE	Homo sapiens	DNA polymerase epsilon catalytic subunit A	0	1.01465	0.999022	null	52	NaN	NaN	NaN	NaN	NaN
Q07864	POLE	Homo sapiens	DNA polymerase epsilon catalytic subunit A	0	1.01465	0.999022	null	54	NaN	NaN	NaN	NaN	NaN
Q07864	POLE	Homo sapiens	DNA polymerase epsilon catalytic subunit A	0	1.01465	0.999022	null	56	NaN	NaN	NaN	NaN	NaN
Q07864	POLE	Homo sapiens	DNA polymerase epsilon catalytic subunit A	0	1.01465	0.999022	null	58	NaN	NaN	NaN	NaN	NaN
Q07864	POLE	Homo sapiens	DNA polymerase epsilon catalytic subunit A	0	1.01465	0.999022	null	60	NaN	NaN	NaN	NaN	NaN
Q07864	POLE	Homo sapiens	DNA polymerase epsilon catalytic subunit A	0	1.01465	0.999022	null	62	1	0.995388	0.996006	1.25035	1.06298
Q07864	POLE	Homo sapiens	DNA polymerase epsilon catalytic subunit A	0	1.01465	0.999022	null	64	1	1.12995	0.921454	1.23715	1.17488
P23921	RRM1	Homo sapiens	Ribonucleoside-diphosphate reductase large subunit	0	1.01456	0.999022	null	42	1	1.02128	1.00109	1.01718	1.0499
P23921	RRM1	Homo sapiens	Ribonucleoside-diphosphate reductase large subunit	0	1.01456	0.999022	null	44	1	1.02822	0.976142	1.03188	1.04477
P23921	RRM1	Homo sapiens	Ribonucleoside-diphosphate reductase large subunit	0	1.01456	0.999022	null	46	1	1.01859	0.978608	1.00201	1.00989
P23921	RRM1	Homo sapiens	Ribonucleoside-diphosphate reductase large subunit	0	1.01456	0.999022	null	48	1	0.978238	0.949687	0.958842	0.989017
P23921	RRM1	Homo sapiens	Ribonucleoside-diphosphate reductase large subunit	0	1.01456	0.999022	null	50	1	1.02553	0.979315	1.01185	1.03661
P23921	RRM1	Homo sapiens	Ribonucleoside-diphosphate reductase large subunit	0	1.01456	0.999022	null	52	1	0.986694	1.00749	1.04068	1.12892
P23921	RRM1	Homo sapiens	Ribonucleoside-diphosphate reductase large subunit	0	1.01456	0.999022	null	54	1	1.03301	1.02054	1.03044	1.07998
P23921	RRM1	Homo sapiens	Ribonucleoside-diphosphate reductase large subunit	0	1.01456	0.999022	null	56	1	1.05141	1.10899	1.11195	1.16451
P23921	RRM1	Homo sapiens	Ribonucleoside-diphosphate reductase large subunit	0	1.01456	0.999022	null	58	1	1.06371	1.08537	1.02678	1.10303
P23921	RRM1	Homo sapiens	Ribonucleoside-diphosphate reductase large subunit	0	1.01456	0.999022	null	60	1	0.965745	1.01013	0.953362	1.02876
P23921	RRM1	Homo sapiens	Ribonucleoside-diphosphate reductase large subunit	0	1.01456	0.999022	null	62	1	1.04661	1.01084	0.933034	1.00158
P23921	RRM1	Homo sapiens	Ribonucleoside-diphosphate reductase large subunit	0	1.01456	0.999022	null	64	1	0.965582	0.967326	0.891038	0.947378
P06493	CDK1	Homo sapiens	Cyclin-dependent kinase 1	0	1.0129	0.999022	null	42	1	1.07151	1.0775	1.08379	1.12402
P06493	CDK1	Homo sapiens	Cyclin-dependent kinase 1	0	1.0129	0.999022	null	44	1	1.03395	0.983191	1.02619	1.01485
P06493	CDK1	Homo sapiens	Cyclin-dependent kinase 1	0	1.0129	0.999022	null	46	1	1.00651	0.970393	1.00048	0.987706
P06493	CDK1	Homo sapiens	Cyclin-dependent kinase 1	0	1.0129	0.999022	null	48	1	1.00513	0.986936	1.01365	1.06283
P06493	CDK1	Homo sapiens	Cyclin-dependent kinase 1	0	1.0129	0.999022	null	50	1	0.93989	0.849296	0.88516	0.950771
P06493	CDK1	Homo sapiens	Cyclin-dependent kinase 1	0	1.0129	0.999022	null	52	1	0.961563	0.884908	0.977066	0.963456
P06493	CDK1	Homo sapiens	Cyclin-dependent kinase 1	0	1.0129	0.999022	null	54	1	0.985629	0.939048	0.945162	1.00458
P06493	CDK1	Homo sapiens	Cyclin-dependent kinase 1	0	1.0129	0.999022	null	56	1	0.963267	0.904409	0.903981	0.93466
P06493	CDK1	Homo sapiens	Cyclin-dependent kinase 1	0	1.0129	0.999022	null	58	1	1.05284	0.986835	1.03919	1.16538
P06493	CDK1	Homo sapiens	Cyclin-dependent kinase 1	0	1.0129	0.999022	null	60	1	0.941898	0.871123	0.945587	1.10313
P06493	CDK1	Homo sapiens	Cyclin-dependent kinase 1	0	1.0129	0.999022	null	62	1	1.05953	0.996322	1.04249	1.39857
P06493	CDK1	Homo sapiens	Cyclin-dependent kinase 1	0	1.0129	0.999022	null	64	1	1.00457	0.95262	1.33367	1.43897
P27694	RPA1	Homo sapiens	Replication protein A 70 kDa DNA-binding subunit	0	1.00963	0.999022	null	42	1	1.01711	1.05966	1.01511	1.03814
P27694	RPA1	Homo sapiens	Replication protein A 70 kDa DNA-binding subunit	0	1.00963	0.999022	null	44	1	1.00526	1.02149	0.989195	0.989865
P27694	RPA1	Homo sapiens	Replication protein A 70 kDa DNA-binding subunit	0	1.00963	0.999022	null	46	1	1.01592	1.06653	0.983972	1.00011
P27694	RPA1	Homo sapiens	Replication protein A 70 kDa DNA-binding subunit	0	1.00963	0.999022	null	48	1	0.998038	1.05911	0.913751	0.994006
P27694	RPA1	Homo sapiens	Replication protein A 70 kDa DNA-binding subunit	0	1.00963	0.999022	null	50	1	0.961593	1.02757	0.920087	0.93063
P27694	RPA1	Homo sapiens	Replication protein A 70 kDa DNA-binding subunit	0	1.00963	0.999022	null	52	1	0.917023	0.910279	0.879178	0.92702
P27694	RPA1	Homo sapiens	Replication protein A 70 kDa DNA-binding subunit	0	1.00963	0.999022	null	54	1	0.961532	1.07941	0.859355	0.853497
P27694	RPA1	Homo sapiens	Replication protein A 70 kDa DNA-binding subunit	0	1.00963	0.999022	null	56	1	0.964567	1.01788	0.877127	0.961234
P27694	RPA1	Homo sapiens	Replication protein A 70 kDa DNA-binding subunit	0	1.00963	0.999022	null	58	1	1.01462	0.950993	1.0898	1.15198
P27694	RPA1	Homo sapiens	Replication protein A 70 kDa DNA-binding subunit	0	1.00963	0.999022	null	60	1	1.14157	1.00737	1.1467	1.28819
P27694	RPA1	Homo sapiens	Replication protein A 70 kDa DNA-binding subunit	0	1.00963	0.999022	null	62	1	1.0721	1.02913	1.00479	1.1766
P27694	RPA1	Homo sapiens	Replication protein A 70 kDa DNA-binding subunit	0	1.00963	0.999022	null	64	1	1.03209	1.03943	1.08697	1.1301
Q5W0B1	RNF219	Homo sapiens	RING finger protein 219	0	1.00912	0.999022	null	42	NaN	NaN	NaN	NaN	NaN
Q5W0B1	RNF219	Homo sapiens	RING finger protein 219	0	1.00912	0.999022	null	44	NaN	NaN	NaN	NaN	NaN
Q5W0B1	RNF219	Homo sapiens	RING finger protein 219	0	1.00912	0.999022	null	46	1	1.01083	0.914125	0.852347	1.04227
Q5W0B1	RNF219	Homo sapiens	RING finger protein 219	0	1.00912	0.999022	null	48	NaN	NaN	NaN	NaN	NaN
Q5W0B1	RNF219	Homo sapiens	RING finger protein 219	0	1.00912	0.999022	null	50	NaN	NaN	NaN	NaN	NaN
Q5W0B1	RNF219	Homo sapiens	RING finger protein 219	0	1.00912	0.999022	null	52	NaN	NaN	NaN	NaN	NaN
Q5W0B1	RNF219	Homo sapiens	RING finger protein 219	0	1.00912	0.999022	null	54	NaN	NaN	NaN	NaN	NaN
Q5W0B1	RNF219	Homo sapiens	RING finger protein 219	0	1.00912	0.999022	null	56	NaN	NaN	NaN	NaN	NaN
Q5W0B1	RNF219	Homo sapiens	RING finger protein 219	0	1.00912	0.999022	null	58	1	1.04772	1.0461	1.27831	1.35529
Q5W0B1	RNF219	Homo sapiens	RING finger protein 219	0	1.00912	0.999022	null	60	NaN	NaN	NaN	NaN	NaN
Q5W0B1	RNF219	Homo sapiens	RING finger protein 219	0	1.00912	0.999022	null	62	NaN	NaN	NaN	NaN	NaN
Q5W0B1	RNF219	Homo sapiens	RING finger protein 219	0	1.00912	0.999022	null	64	NaN	NaN	NaN	NaN	NaN
Q9UNS1	TIMELESS	Homo sapiens	Protein timeless homolog	0	1.00648	0.999022	null	42	1	1.0867	0.906035	0.895756	1.07683
Q9UNS1	TIMELESS	Homo sapiens	Protein timeless homolog	0	1.00648	0.999022	null	44	NaN	NaN	NaN	NaN	NaN
Q9UNS1	TIMELESS	Homo sapiens	Protein timeless homolog	0	1.00648	0.999022	null	46	NaN	NaN	NaN	NaN	NaN
Q9UNS1	TIMELESS	Homo sapiens	Protein timeless homolog	0	1.00648	0.999022	null	48	NaN	NaN	NaN	NaN	NaN
Q9UNS1	TIMELESS	Homo sapiens	Protein timeless homolog	0	1.00648	0.999022	null	50	NaN	NaN	NaN	NaN	NaN
Q9UNS1	TIMELESS	Homo sapiens	Protein timeless homolog	0	1.00648	0.999022	null	52	NaN	NaN	NaN	NaN	NaN
Q9UNS1	TIMELESS	Homo sapiens	Protein timeless homolog	0	1.00648	0.999022	null	54	NaN	NaN	NaN	NaN	NaN
Q9UNS1	TIMELESS	Homo sapiens	Protein timeless homolog	0	1.00648	0.999022	null	56	NaN	NaN	NaN	NaN	NaN
Q9UNS1	TIMELESS	Homo sapiens	Protein timeless homolog	0	1.00648	0.999022	null	58	NaN	NaN	NaN	NaN	NaN
Q9UNS1	TIMELESS	Homo sapiens	Protein timeless homolog	0	1.00648	0.999022	null	60	NaN	NaN	NaN	NaN	NaN
Q9UNS1	TIMELESS	Homo sapiens	Protein timeless homolog	0	1.00648	0.999022	null	62	1	1.32468	NaN	1.09525	1.00359
Q9UNS1	TIMELESS	Homo sapiens	Protein timeless homolog	0	1.00648	0.999022	null	64	NaN	NaN	NaN	NaN	NaN
P49959-3	MRE11	Homo sapiens	Isoform 3 of Double-strand break repair protein MRE11	0	1.00334	0.999022	null	42	1	1.00112	1.00536	1.00883	0.997632
P49959-3	MRE11	Homo sapiens	Isoform 3 of Double-strand break repair protein MRE11	0	1.00334	0.999022	null	44	1	0.97595	0.992921	0.995213	1.02187
P49959-3	MRE11	Homo sapiens	Isoform 3 of Double-strand break repair protein MRE11	0	1.00334	0.999022	null	46	1	0.952792	0.993609	1.01581	1.03283
P49959-3	MRE11	Homo sapiens	Isoform 3 of Double-strand break repair protein MRE11	0	1.00334	0.999022	null	48	1	0.989958	1.00152	1.01294	1.07528
P49959-3	MRE11	Homo sapiens	Isoform 3 of Double-strand break repair protein MRE11	0	1.00334	0.999022	null	50	1	0.99947	0.9852	0.99405	0.974229
P49959-3	MRE11	Homo sapiens	Isoform 3 of Double-strand break repair protein MRE11	0	1.00334	0.999022	null	52	1	1.02347	1.00536	0.935374	0.991544
P49959-3	MRE11	Homo sapiens	Isoform 3 of Double-strand break repair protein MRE11	0	1.00334	0.999022	null	54	1	1.00845	1.03541	0.92701	1.01042
P49959-3	MRE11	Homo sapiens	Isoform 3 of Double-strand break repair protein MRE11	0	1.00334	0.999022	null	56	1	0.942629	0.954726	0.928792	0.975228
P49959-3	MRE11	Homo sapiens	Isoform 3 of Double-strand break repair protein MRE11	0	1.00334	0.999022	null	58	1	1.07004	1.12015	0.993283	1.03164
P49959-3	MRE11	Homo sapiens	Isoform 3 of Double-strand break repair protein MRE11	0	1.00334	0.999022	null	60	1	0.989478	1.06352	0.965714	1.02668
P49959-3	MRE11	Homo sapiens	Isoform 3 of Double-strand break repair protein MRE11	0	1.00334	0.999022	null	62	1	1.07336	1.09783	1.00939	1.06409
P49959-3	MRE11	Homo sapiens	Isoform 3 of Double-strand break repair protein MRE11	0	1.00334	0.999022	null	64	1	1.0036	1.03973	0.953217	0.933842
Q96ST3	SIN3A	Homo sapiens	Paired amphipathic helix protein Sin3a	0	1.00277	0.999022	null	42	1	1.05134	1.06158	1.04257	1.0301
Q96ST3	SIN3A	Homo sapiens	Paired amphipathic helix protein Sin3a	0	1.00277	0.999022	null	44	1	1.04986	1.09687	1.05062	0.989218
Q96ST3	SIN3A	Homo sapiens	Paired amphipathic helix protein Sin3a	0	1.00277	0.999022	null	46	1	0.941711	0.974813	0.941075	1.00995
Q96ST3	SIN3A	Homo sapiens	Paired amphipathic helix protein Sin3a	0	1.00277	0.999022	null	48	1	0.996038	1.03334	0.97523	1.00669
Q96ST3	SIN3A	Homo sapiens	Paired amphipathic helix protein Sin3a	0	1.00277	0.999022	null	50	1	0.967652	1.00158	0.938985	1.01021
Q96ST3	SIN3A	Homo sapiens	Paired amphipathic helix protein Sin3a	0	1.00277	0.999022	null	52	NaN	NaN	NaN	NaN	NaN
Q96ST3	SIN3A	Homo sapiens	Paired amphipathic helix protein Sin3a	0	1.00277	0.999022	null	54	1	0.967557	0.92675	0.968769	1.02232
Q96ST3	SIN3A	Homo sapiens	Paired amphipathic helix protein Sin3a	0	1.00277	0.999022	null	56	NaN	NaN	NaN	NaN	NaN
Q96ST3	SIN3A	Homo sapiens	Paired amphipathic helix protein Sin3a	0	1.00277	0.999022	null	58	1	0.995354	0.995865	1.09154	1.08837
Q96ST3	SIN3A	Homo sapiens	Paired amphipathic helix protein Sin3a	0	1.00277	0.999022	null	60	1	1.02249	0.960817	1.08201	1.03506
Q96ST3	SIN3A	Homo sapiens	Paired amphipathic helix protein Sin3a	0	1.00277	0.999022	null	62	1	0.876177	0.909666	0.991309	1.00033
Q96ST3	SIN3A	Homo sapiens	Paired amphipathic helix protein Sin3a	0	1.00277	0.999022	null	64	1	0.960377	0.903726	1.11231	1.08619
O60921	HUS1	Homo sapiens	Checkpoint protein HUS1	0	1.00201	0.999022	null	42	1	1.03709	1.03714	1.00745	1.01876
O60921	HUS1	Homo sapiens	Checkpoint protein HUS1	0	1.00201	0.999022	null	44	1	1.00802	0.970209	0.950541	0.986474
O60921	HUS1	Homo sapiens	Checkpoint protein HUS1	0	1.00201	0.999022	null	46	1	0.957875	0.971322	1.01614	0.969197
O60921	HUS1	Homo sapiens	Checkpoint protein HUS1	0	1.00201	0.999022	null	48	1	0.9461	0.97168	0.891386	0.917615
O60921	HUS1	Homo sapiens	Checkpoint protein HUS1	0	1.00201	0.999022	null	50	1	0.986974	0.943033	0.988039	1.01559
O60921	HUS1	Homo sapiens	Checkpoint protein HUS1	0	1.00201	0.999022	null	52	1	1.01406	1.01278	0.961512	1.02825
O60921	HUS1	Homo sapiens	Checkpoint protein HUS1	0	1.00201	0.999022	null	54	1	0.957545	1.0467	1.0119	1.08052
O60921	HUS1	Homo sapiens	Checkpoint protein HUS1	0	1.00201	0.999022	null	56	1	0.966203	1.04357	0.993366	1.00145
O60921	HUS1	Homo sapiens	Checkpoint protein HUS1	0	1.00201	0.999022	null	58	1	0.986922	1.011	0.93135	0.909732
O60921	HUS1	Homo sapiens	Checkpoint protein HUS1	0	1.00201	0.999022	null	60	1	0.960771	0.907162	0.849156	0.93033
O60921	HUS1	Homo sapiens	Checkpoint protein HUS1	0	1.00201	0.999022	null	62	1	1.09463	1.18821	1.05411	1.01567
O60921	HUS1	Homo sapiens	Checkpoint protein HUS1	0	1.00201	0.999022	null	64	1	1.14785	1.21091	1.05911	1.15538
Q8WXE1	ATRIP	Homo sapiens	ATR-interacting protein	0	1	0.999022	null	42	NaN	NaN	NaN	NaN	NaN
Q8WXE1	ATRIP	Homo sapiens	ATR-interacting protein	0	1	0.999022	null	44	NaN	NaN	NaN	NaN	NaN
Q8WXE1	ATRIP	Homo sapiens	ATR-interacting protein	0	1	0.999022	null	46	NaN	NaN	NaN	NaN	NaN
Q8WXE1	ATRIP	Homo sapiens	ATR-interacting protein	0	1	0.999022	null	48	NaN	NaN	NaN	NaN	NaN
Q8WXE1	ATRIP	Homo sapiens	ATR-interacting protein	0	1	0.999022	null	50	NaN	NaN	NaN	NaN	NaN
Q8WXE1	ATRIP	Homo sapiens	ATR-interacting protein	0	1	0.999022	null	52	NaN	NaN	NaN	NaN	NaN
Q8WXE1	ATRIP	Homo sapiens	ATR-interacting protein	0	1	0.999022	null	54	NaN	NaN	NaN	NaN	NaN
Q8WXE1	ATRIP	Homo sapiens	ATR-interacting protein	0	1	0.999022	null	56	NaN	NaN	NaN	NaN	NaN
Q8WXE1	ATRIP	Homo sapiens	ATR-interacting protein	0	1	0.999022	null	58	NaN	NaN	NaN	NaN	NaN
Q8WXE1	ATRIP	Homo sapiens	ATR-interacting protein	0	1	0.999022	null	60	NaN	NaN	NaN	NaN	NaN
Q8WXE1	ATRIP	Homo sapiens	ATR-interacting protein	0	1	0.999022	null	62	NaN	NaN	NaN	NaN	NaN
Q8WXE1	ATRIP	Homo sapiens	ATR-interacting protein	0	1	0.999022	null	64	NaN	NaN	NaN	NaN	NaN
Q8NAP3	ZBTB38	Homo sapiens	Zinc finger and BTB domain-containing protein 38	0	1	0.999022	null	42	NaN	NaN	NaN	NaN	NaN
Q8NAP3	ZBTB38	Homo sapiens	Zinc finger and BTB domain-containing protein 38	0	1	0.999022	null	44	NaN	NaN	NaN	NaN	NaN
Q8NAP3	ZBTB38	Homo sapiens	Zinc finger and BTB domain-containing protein 38	0	1	0.999022	null	46	NaN	NaN	NaN	NaN	NaN
Q8NAP3	ZBTB38	Homo sapiens	Zinc finger and BTB domain-containing protein 38	0	1	0.999022	null	48	NaN	NaN	NaN	NaN	NaN
Q8NAP3	ZBTB38	Homo sapiens	Zinc finger and BTB domain-containing protein 38	0	1	0.999022	null	50	NaN	NaN	NaN	NaN	NaN
Q8NAP3	ZBTB38	Homo sapiens	Zinc finger and BTB domain-containing protein 38	0	1	0.999022	null	52	NaN	NaN	NaN	NaN	NaN
Q8NAP3	ZBTB38	Homo sapiens	Zinc finger and BTB domain-containing protein 38	0	1	0.999022	null	54	NaN	NaN	NaN	NaN	NaN
Q8NAP3	ZBTB38	Homo sapiens	Zinc finger and BTB domain-containing protein 38	0	1	0.999022	null	56	NaN	NaN	NaN	NaN	NaN
Q8NAP3	ZBTB38	Homo sapiens	Zinc finger and BTB domain-containing protein 38	0	1	0.999022	null	58	NaN	NaN	NaN	NaN	NaN
Q8NAP3	ZBTB38	Homo sapiens	Zinc finger and BTB domain-containing protein 38	0	1	0.999022	null	60	NaN	NaN	NaN	NaN	NaN
Q8NAP3	ZBTB38	Homo sapiens	Zinc finger and BTB domain-containing protein 38	0	1	0.999022	null	62	NaN	NaN	NaN	NaN	NaN
Q8NAP3	ZBTB38	Homo sapiens	Zinc finger and BTB domain-containing protein 38	0	1	0.999022	null	64	NaN	NaN	NaN	NaN	NaN
Q9NRF9	POLE3	Homo sapiens	DNA polymerase epsilon subunit 3	0	0.999089	0.999022	null	42	1	0.998477	0.974225	0.98301	1.04424
Q9NRF9	POLE3	Homo sapiens	DNA polymerase epsilon subunit 3	0	0.999089	0.999022	null	44	1	0.988668	0.949765	0.997724	0.991257
Q9NRF9	POLE3	Homo sapiens	DNA polymerase epsilon subunit 3	0	0.999089	0.999022	null	46	1	1.00442	1.00057	0.989764	0.953823
Q9NRF9	POLE3	Homo sapiens	DNA polymerase epsilon subunit 3	0	0.999089	0.999022	null	48	1	0.935207	0.939677	0.940269	0.933716
Q9NRF9	POLE3	Homo sapiens	DNA polymerase epsilon subunit 3	0	0.999089	0.999022	null	50	1	1.00756	1.01283	1.04395	1.03863
Q9NRF9	POLE3	Homo sapiens	DNA polymerase epsilon subunit 3	0	0.999089	0.999022	null	52	1	0.967209	0.948706	1.00957	1.01084
Q9NRF9	POLE3	Homo sapiens	DNA polymerase epsilon subunit 3	0	0.999089	0.999022	null	54	1	1.07196	1.026	1.01522	0.973649
Q9NRF9	POLE3	Homo sapiens	DNA polymerase epsilon subunit 3	0	0.999089	0.999022	null	56	1	0.957215	0.988767	0.938968	0.998578
Q9NRF9	POLE3	Homo sapiens	DNA polymerase epsilon subunit 3	0	0.999089	0.999022	null	58	1	1.00416	1.07847	0.952528	0.929326
Q9NRF9	POLE3	Homo sapiens	DNA polymerase epsilon subunit 3	0	0.999089	0.999022	null	60	1	0.998163	1.11485	0.990645	0.950406
Q9NRF9	POLE3	Homo sapiens	DNA polymerase epsilon subunit 3	0	0.999089	0.999022	null	62	1	0.969561	0.96883	0.909765	0.92673
Q9NRF9	POLE3	Homo sapiens	DNA polymerase epsilon subunit 3	0	0.999089	0.999022	null	64	1	1.12204	1.32334	0.969607	1.10245
Q9HCU8	POLD4	Homo sapiens	DNA polymerase delta subunit 4	0	0.998704	0.999022	null	42	NaN	NaN	NaN	NaN	NaN
Q9HCU8	POLD4	Homo sapiens	DNA polymerase delta subunit 4	0	0.998704	0.999022	null	44	NaN	NaN	NaN	NaN	NaN
Q9HCU8	POLD4	Homo sapiens	DNA polymerase delta subunit 4	0	0.998704	0.999022	null	46	NaN	NaN	NaN	NaN	NaN
Q9HCU8	POLD4	Homo sapiens	DNA polymerase delta subunit 4	0	0.998704	0.999022	null	48	NaN	NaN	NaN	NaN	NaN
Q9HCU8	POLD4	Homo sapiens	DNA polymerase delta subunit 4	0	0.998704	0.999022	null	50	NaN	NaN	NaN	NaN	NaN
Q9HCU8	POLD4	Homo sapiens	DNA polymerase delta subunit 4	0	0.998704	0.999022	null	52	1	0.984046	0.955914	0.902629	1.00409
Q9HCU8	POLD4	Homo sapiens	DNA polymerase delta subunit 4	0	0.998704	0.999022	null	54	NaN	NaN	NaN	NaN	NaN
Q9HCU8	POLD4	Homo sapiens	DNA polymerase delta subunit 4	0	0.998704	0.999022	null	56	1	1.04659	0.994095	0.990886	1.044
Q9HCU8	POLD4	Homo sapiens	DNA polymerase delta subunit 4	0	0.998704	0.999022	null	58	NaN	NaN	NaN	NaN	NaN
Q9HCU8	POLD4	Homo sapiens	DNA polymerase delta subunit 4	0	0.998704	0.999022	null	60	NaN	NaN	NaN	NaN	NaN
Q9HCU8	POLD4	Homo sapiens	DNA polymerase delta subunit 4	0	0.998704	0.999022	null	62	NaN	NaN	NaN	NaN	NaN
Q9HCU8	POLD4	Homo sapiens	DNA polymerase delta subunit 4	0	0.998704	0.999022	null	64	NaN	NaN	NaN	NaN	NaN
Q9Y5N6	ORC6	Homo sapiens	Origin recognition complex subunit 6	0	0.996444	0.999022	null	42	NaN	NaN	NaN	NaN	NaN
Q9Y5N6	ORC6	Homo sapiens	Origin recognition complex subunit 6	0	0.996444	0.999022	null	44	1	0.999873	0.941082	0.951745	1.02802
Q9Y5N6	ORC6	Homo sapiens	Origin recognition complex subunit 6	0	0.996444	0.999022	null	46	NaN	NaN	NaN	NaN	NaN
Q9Y5N6	ORC6	Homo sapiens	Origin recognition complex subunit 6	0	0.996444	0.999022	null	48	NaN	NaN	NaN	NaN	NaN
Q9Y5N6	ORC6	Homo sapiens	Origin recognition complex subunit 6	0	0.996444	0.999022	null	50	NaN	NaN	NaN	NaN	NaN
Q9Y5N6	ORC6	Homo sapiens	Origin recognition complex subunit 6	0	0.996444	0.999022	null	52	NaN	NaN	NaN	NaN	NaN
Q9Y5N6	ORC6	Homo sapiens	Origin recognition complex subunit 6	0	0.996444	0.999022	null	54	NaN	NaN	NaN	NaN	NaN
Q9Y5N6	ORC6	Homo sapiens	Origin recognition complex subunit 6	0	0.996444	0.999022	null	56	NaN	NaN	NaN	NaN	NaN
Q9Y5N6	ORC6	Homo sapiens	Origin recognition complex subunit 6	0	0.996444	0.999022	null	58	NaN	NaN	NaN	NaN	NaN
Q9Y5N6	ORC6	Homo sapiens	Origin recognition complex subunit 6	0	0.996444	0.999022	null	60	NaN	NaN	NaN	NaN	NaN
Q9Y5N6	ORC6	Homo sapiens	Origin recognition complex subunit 6	0	0.996444	0.999022	null	62	NaN	NaN	NaN	NaN	NaN
Q9Y5N6	ORC6	Homo sapiens	Origin recognition complex subunit 6	0	0.996444	0.999022	null	64	1	1.08011	0.937206	0.884925	0.963667
Q9UQE7	SMC3	Homo sapiens	Structural maintenance of chromosomes protein 3	0	0.990428	0.999022	null	42	1	0.982054	0.995497	0.995381	0.958377
Q9UQE7	SMC3	Homo sapiens	Structural maintenance of chromosomes protein 3	0	0.990428	0.999022	null	44	1	1.00471	1.01671	1.01521	1.01828
Q9UQE7	SMC3	Homo sapiens	Structural maintenance of chromosomes protein 3	0	0.990428	0.999022	null	46	1	0.977858	0.982677	0.988466	0.989577
Q9UQE7	SMC3	Homo sapiens	Structural maintenance of chromosomes protein 3	0	0.990428	0.999022	null	48	1	0.963466	1.00975	1.00072	1.03115
Q9UQE7	SMC3	Homo sapiens	Structural maintenance of chromosomes protein 3	0	0.990428	0.999022	null	50	1	1.00541	1.01969	1.00274	1.00854
Q9UQE7	SMC3	Homo sapiens	Structural maintenance of chromosomes protein 3	0	0.990428	0.999022	null	52	1	0.962928	0.929321	0.924837	0.944148
Q9UQE7	SMC3	Homo sapiens	Structural maintenance of chromosomes protein 3	0	0.990428	0.999022	null	54	1	0.964874	0.916975	0.941298	0.948826
Q9UQE7	SMC3	Homo sapiens	Structural maintenance of chromosomes protein 3	0	0.990428	0.999022	null	56	1	0.940443	0.922099	0.958169	1.00645
Q9UQE7	SMC3	Homo sapiens	Structural maintenance of chromosomes protein 3	0	0.990428	0.999022	null	58	1	1.02333	0.990936	1.04448	1.12165
Q9UQE7	SMC3	Homo sapiens	Structural maintenance of chromosomes protein 3	0	0.990428	0.999022	null	60	1	0.970275	0.949282	1.07738	1.14157
Q9UQE7	SMC3	Homo sapiens	Structural maintenance of chromosomes protein 3	0	0.990428	0.999022	null	62	1	0.906677	0.933879	0.949804	1.01808
Q9UQE7	SMC3	Homo sapiens	Structural maintenance of chromosomes protein 3	0	0.990428	0.999022	null	64	1	0.98703	0.962881	0.982898	1.03886
Q14191	WRN	Homo sapiens	Werner syndrome ATP-dependent helicase	-0.0166667	1.02633	0.679874	Destabilized	42	NaN	NaN	NaN	NaN	NaN
Q14191	WRN	Homo sapiens	Werner syndrome ATP-dependent helicase	-0.0166667	1.02633	0.679874	Destabilized	44	1	0.947597	1.00589	1.23818	1.17755
Q14191	WRN	Homo sapiens	Werner syndrome ATP-dependent helicase	-0.0166667	1.02633	0.679874	Destabilized	46	NaN	NaN	NaN	NaN	NaN
Q14191	WRN	Homo sapiens	Werner syndrome ATP-dependent helicase	-0.0166667	1.02633	0.679874	Destabilized	48	NaN	NaN	NaN	NaN	NaN
Q14191	WRN	Homo sapiens	Werner syndrome ATP-dependent helicase	-0.0166667	1.02633	0.679874	Destabilized	50	NaN	NaN	NaN	NaN	NaN
Q14191	WRN	Homo sapiens	Werner syndrome ATP-dependent helicase	-0.0166667	1.02633	0.679874	Destabilized	52	NaN	NaN	NaN	NaN	NaN
Q14191	WRN	Homo sapiens	Werner syndrome ATP-dependent helicase	-0.0166667	1.02633	0.679874	Destabilized	54	NaN	NaN	NaN	NaN	NaN
Q14191	WRN	Homo sapiens	Werner syndrome ATP-dependent helicase	-0.0166667	1.02633	0.679874	Destabilized	56	NaN	NaN	NaN	NaN	NaN
Q14191	WRN	Homo sapiens	Werner syndrome ATP-dependent helicase	-0.0166667	1.02633	0.679874	Destabilized	58	NaN	NaN	NaN	NaN	NaN
Q14191	WRN	Homo sapiens	Werner syndrome ATP-dependent helicase	-0.0166667	1.02633	0.679874	Destabilized	60	NaN	NaN	NaN	NaN	NaN
Q14191	WRN	Homo sapiens	Werner syndrome ATP-dependent helicase	-0.0166667	1.02633	0.679874	Destabilized	62	NaN	NaN	NaN	NaN	NaN
Q14191	WRN	Homo sapiens	Werner syndrome ATP-dependent helicase	-0.0166667	1.02633	0.679874	Destabilized	64	1	1.20468	1.89157	0.667668	1.44671
Q9NR33	POLE4	Homo sapiens	DNA polymerase epsilon subunit 4	-0.0166667	1.00144	0.679874	Destabilized	42	NaN	NaN	NaN	NaN	NaN
Q9NR33	POLE4	Homo sapiens	DNA polymerase epsilon subunit 4	-0.0166667	1.00144	0.679874	Destabilized	44	NaN	NaN	NaN	NaN	NaN
Q9NR33	POLE4	Homo sapiens	DNA polymerase epsilon subunit 4	-0.0166667	1.00144	0.679874	Destabilized	46	1	1.2264	1.03907	0.845854	1.16763
Q9NR33	POLE4	Homo sapiens	DNA polymerase epsilon subunit 4	-0.0166667	1.00144	0.679874	Destabilized	48	NaN	NaN	NaN	NaN	NaN
Q9NR33	POLE4	Homo sapiens	DNA polymerase epsilon subunit 4	-0.0166667	1.00144	0.679874	Destabilized	50	NaN	NaN	NaN	NaN	NaN
Q9NR33	POLE4	Homo sapiens	DNA polymerase epsilon subunit 4	-0.0166667	1.00144	0.679874	Destabilized	52	NaN	NaN	NaN	NaN	NaN
Q9NR33	POLE4	Homo sapiens	DNA polymerase epsilon subunit 4	-0.0166667	1.00144	0.679874	Destabilized	54	NaN	NaN	NaN	NaN	NaN
Q9NR33	POLE4	Homo sapiens	DNA polymerase epsilon subunit 4	-0.0166667	1.00144	0.679874	Destabilized	56	NaN	NaN	NaN	NaN	NaN
Q9NR33	POLE4	Homo sapiens	DNA polymerase epsilon subunit 4	-0.0166667	1.00144	0.679874	Destabilized	58	1	0.893404	1.00195	1.08602	0.825853
Q9NR33	POLE4	Homo sapiens	DNA polymerase epsilon subunit 4	-0.0166667	1.00144	0.679874	Destabilized	60	NaN	NaN	NaN	NaN	NaN
Q9NR33	POLE4	Homo sapiens	DNA polymerase epsilon subunit 4	-0.0166667	1.00144	0.679874	Destabilized	62	NaN	NaN	NaN	NaN	NaN
Q9NR33	POLE4	Homo sapiens	DNA polymerase epsilon subunit 4	-0.0166667	1.00144	0.679874	Destabilized	64	NaN	NaN	NaN	NaN	NaN
O60934	NBN	Homo sapiens	Nibrin	-0.0166667	1.0532	0.679874	Destabilized	42	1	1.03233	0.956874	0.947418	0.921458
O60934	NBN	Homo sapiens	Nibrin	-0.0166667	1.0532	0.679874	Destabilized	44	1	1.12898	1.0386	1.05644	1.04998
O60934	NBN	Homo sapiens	Nibrin	-0.0166667	1.0532	0.679874	Destabilized	46	1	0.927069	0.960016	0.942489	0.955441
O60934	NBN	Homo sapiens	Nibrin	-0.0166667	1.0532	0.679874	Destabilized	48	1	1.01001	1.12375	1.11973	1.15133
O60934	NBN	Homo sapiens	Nibrin	-0.0166667	1.0532	0.679874	Destabilized	50	NaN	NaN	NaN	NaN	NaN
O60934	NBN	Homo sapiens	Nibrin	-0.0166667	1.0532	0.679874	Destabilized	52	NaN	NaN	NaN	NaN	NaN
O60934	NBN	Homo sapiens	Nibrin	-0.0166667	1.0532	0.679874	Destabilized	54	NaN	NaN	NaN	NaN	NaN
O60934	NBN	Homo sapiens	Nibrin	-0.0166667	1.0532	0.679874	Destabilized	56	NaN	NaN	NaN	NaN	NaN
O60934	NBN	Homo sapiens	Nibrin	-0.0166667	1.0532	0.679874	Destabilized	58	1	1.52921	1.08151	1.88858	1.94653
O60934	NBN	Homo sapiens	Nibrin	-0.0166667	1.0532	0.679874	Destabilized	60	1	1.13369	1.09772	1.00631	1.00533
O60934	NBN	Homo sapiens	Nibrin	-0.0166667	1.0532	0.679874	Destabilized	62	1	1.21781	0.965684	1.56617	1.4175
O60934	NBN	Homo sapiens	Nibrin	-0.0166667	1.0532	0.679874	Destabilized	64	1	0.827076	0.696013	0.704484	0.786467
P10070	GLI2	Homo sapiens	Zinc finger protein GLI2	-0.0333333	0.997325	0.408522	Destabilized	42	1	0.987568	1.03278	0.997075	0.997388
P10070	GLI2	Homo sapiens	Zinc finger protein GLI2	-0.0333333	0.997325	0.408522	Destabilized	44	1	0.900571	1.02754	1.07505	1.01007
P10070	GLI2	Homo sapiens	Zinc finger protein GLI2	-0.0333333	0.997325	0.408522	Destabilized	46	1	0.564001	0.485736	0.427917	0.487042
P10070	GLI2	Homo sapiens	Zinc finger protein GLI2	-0.0333333	0.997325	0.408522	Destabilized	48	NaN	NaN	NaN	NaN	NaN
P10070	GLI2	Homo sapiens	Zinc finger protein GLI2	-0.0333333	0.997325	0.408522	Destabilized	50	NaN	NaN	NaN	NaN	NaN
P10070	GLI2	Homo sapiens	Zinc finger protein GLI2	-0.0333333	0.997325	0.408522	Destabilized	52	NaN	NaN	NaN	NaN	NaN
P10070	GLI2	Homo sapiens	Zinc finger protein GLI2	-0.0333333	0.997325	0.408522	Destabilized	54	NaN	NaN	NaN	NaN	NaN
P10070	GLI2	Homo sapiens	Zinc finger protein GLI2	-0.0333333	0.997325	0.408522	Destabilized	56	NaN	NaN	NaN	NaN	NaN
P10070	GLI2	Homo sapiens	Zinc finger protein GLI2	-0.0333333	0.997325	0.408522	Destabilized	58	1	0.820405	0.619907	0.99156	0.953856
P10070	GLI2	Homo sapiens	Zinc finger protein GLI2	-0.0333333	0.997325	0.408522	Destabilized	60	NaN	NaN	NaN	NaN	NaN
P10070	GLI2	Homo sapiens	Zinc finger protein GLI2	-0.0333333	0.997325	0.408522	Destabilized	62	1	0.862125	0.993535	1.03165	1.19102
P10070	GLI2	Homo sapiens	Zinc finger protein GLI2	-0.0333333	0.997325	0.408522	Destabilized	64	1	1.00969	1.13917	2.22556	2.00828
O14757	CHEK1	Homo sapiens	Serine/threonine-protein kinase Chk1	-0.0333333	0.944918	0.408522	Solubility/Expression	42	1	0.344431	0.512343	0.407684	0.485231
O14757	CHEK1	Homo sapiens	Serine/threonine-protein kinase Chk1	-0.0333333	0.944918	0.408522	Solubility/Expression	44	1	0.813386	1.02973	0.781144	0.90371
O14757	CHEK1	Homo sapiens	Serine/threonine-protein kinase Chk1	-0.0333333	0.944918	0.408522	Solubility/Expression	46	NaN	NaN	NaN	NaN	NaN
O14757	CHEK1	Homo sapiens	Serine/threonine-protein kinase Chk1	-0.0333333	0.944918	0.408522	Solubility/Expression	48	NaN	NaN	NaN	NaN	NaN
O14757	CHEK1	Homo sapiens	Serine/threonine-protein kinase Chk1	-0.0333333	0.944918	0.408522	Solubility/Expression	50	1	0.279636	0.293491	0.22004	0.302065
O14757	CHEK1	Homo sapiens	Serine/threonine-protein kinase Chk1	-0.0333333	0.944918	0.408522	Solubility/Expression	52	NaN	NaN	NaN	NaN	NaN
O14757	CHEK1	Homo sapiens	Serine/threonine-protein kinase Chk1	-0.0333333	0.944918	0.408522	Solubility/Expression	54	1	0.97004	0.877107	1.34615	1.35033
O14757	CHEK1	Homo sapiens	Serine/threonine-protein kinase Chk1	-0.0333333	0.944918	0.408522	Solubility/Expression	56	NaN	NaN	NaN	NaN	NaN
O14757	CHEK1	Homo sapiens	Serine/threonine-protein kinase Chk1	-0.0333333	0.944918	0.408522	Solubility/Expression	58	NaN	NaN	NaN	NaN	NaN
O14757	CHEK1	Homo sapiens	Serine/threonine-protein kinase Chk1	-0.0333333	0.944918	0.408522	Solubility/Expression	60	NaN	NaN	NaN	NaN	NaN
O14757	CHEK1	Homo sapiens	Serine/threonine-protein kinase Chk1	-0.0333333	0.944918	0.408522	Solubility/Expression	62	1	1.98574	1.02063	1.70417	1.34617
O14757	CHEK1	Homo sapiens	Serine/threonine-protein kinase Chk1	-0.0333333	0.944918	0.408522	Solubility/Expression	64	1	0.993501	0.923253	0.83525	0.969832
O95251	KAT7	Homo sapiens	Histone acetyltransferase KAT7	-0.0333333	1.00556	0.408522	Destabilized	42	1	0.936785	1.19708	1.18348	1.26248
O95251	KAT7	Homo sapiens	Histone acetyltransferase KAT7	-0.0333333	1.00556	0.408522	Destabilized	44	NaN	NaN	NaN	NaN	NaN
O95251	KAT7	Homo sapiens	Histone acetyltransferase KAT7	-0.0333333	1.00556	0.408522	Destabilized	46	NaN	NaN	NaN	NaN	NaN
O95251	KAT7	Homo sapiens	Histone acetyltransferase KAT7	-0.0333333	1.00556	0.408522	Destabilized	48	NaN	NaN	NaN	NaN	NaN
O95251	KAT7	Homo sapiens	Histone acetyltransferase KAT7	-0.0333333	1.00556	0.408522	Destabilized	50	NaN	NaN	NaN	NaN	NaN
O95251	KAT7	Homo sapiens	Histone acetyltransferase KAT7	-0.0333333	1.00556	0.408522	Destabilized	52	NaN	NaN	NaN	NaN	NaN
O95251	KAT7	Homo sapiens	Histone acetyltransferase KAT7	-0.0333333	1.00556	0.408522	Destabilized	54	NaN	NaN	NaN	NaN	NaN
O95251	KAT7	Homo sapiens	Histone acetyltransferase KAT7	-0.0333333	1.00556	0.408522	Destabilized	56	NaN	NaN	NaN	NaN	NaN
O95251	KAT7	Homo sapiens	Histone acetyltransferase KAT7	-0.0333333	1.00556	0.408522	Destabilized	58	NaN	NaN	NaN	NaN	NaN
O95251	KAT7	Homo sapiens	Histone acetyltransferase KAT7	-0.0333333	1.00556	0.408522	Destabilized	60	NaN	NaN	NaN	NaN	NaN
O95251	KAT7	Homo sapiens	Histone acetyltransferase KAT7	-0.0333333	1.00556	0.408522	Destabilized	62	1	1.00613	NaN	0.79647	0.950973
O95251	KAT7	Homo sapiens	Histone acetyltransferase KAT7	-0.0333333	1.00556	0.408522	Destabilized	64	NaN	NaN	NaN	NaN	NaN
Q9BW66-3	CINP	Homo sapiens	Isoform 3 of Cyclin-dependent kinase 2-interacting protein	-0.0333333	0.988184	0.408522	Destabilized	42	NaN	NaN	NaN	NaN	NaN
Q9BW66-3	CINP	Homo sapiens	Isoform 3 of Cyclin-dependent kinase 2-interacting protein	-0.0333333	0.988184	0.408522	Destabilized	44	NaN	NaN	NaN	NaN	NaN
Q9BW66-3	CINP	Homo sapiens	Isoform 3 of Cyclin-dependent kinase 2-interacting protein	-0.0333333	0.988184	0.408522	Destabilized	46	1	1.04851	0.991564	0.995268	0.932738
Q9BW66-3	CINP	Homo sapiens	Isoform 3 of Cyclin-dependent kinase 2-interacting protein	-0.0333333	0.988184	0.408522	Destabilized	48	NaN	NaN	NaN	NaN	NaN
Q9BW66-3	CINP	Homo sapiens	Isoform 3 of Cyclin-dependent kinase 2-interacting protein	-0.0333333	0.988184	0.408522	Destabilized	50	1	0.774262	1.09826	0.709757	0.603722
Q9BW66-3	CINP	Homo sapiens	Isoform 3 of Cyclin-dependent kinase 2-interacting protein	-0.0333333	0.988184	0.408522	Destabilized	52	NaN	NaN	NaN	NaN	NaN
Q9BW66-3	CINP	Homo sapiens	Isoform 3 of Cyclin-dependent kinase 2-interacting protein	-0.0333333	0.988184	0.408522	Destabilized	54	1	0.974552	0.96988	1.0804	1.19611
Q9BW66-3	CINP	Homo sapiens	Isoform 3 of Cyclin-dependent kinase 2-interacting protein	-0.0333333	0.988184	0.408522	Destabilized	56	NaN	NaN	NaN	NaN	NaN
Q9BW66-3	CINP	Homo sapiens	Isoform 3 of Cyclin-dependent kinase 2-interacting protein	-0.0333333	0.988184	0.408522	Destabilized	58	1	0.864111	0.934226	1.07919	1.03849
Q9BW66-3	CINP	Homo sapiens	Isoform 3 of Cyclin-dependent kinase 2-interacting protein	-0.0333333	0.988184	0.408522	Destabilized	60	NaN	NaN	NaN	NaN	NaN
Q9BW66-3	CINP	Homo sapiens	Isoform 3 of Cyclin-dependent kinase 2-interacting protein	-0.0333333	0.988184	0.408522	Destabilized	62	NaN	NaN	NaN	NaN	NaN
Q9BW66-3	CINP	Homo sapiens	Isoform 3 of Cyclin-dependent kinase 2-interacting protein	-0.0333333	0.988184	0.408522	Destabilized	64	NaN	NaN	NaN	NaN	NaN
P50750-2	CDK9	Homo sapiens	Isoform 2 of Cyclin-dependent kinase 9	-0.0333333	1.03044	0.408522	Destabilized	42	1	1.07872	1.00663	1.00092	0.998377
P50750-2	CDK9	Homo sapiens	Isoform 2 of Cyclin-dependent kinase 9	-0.0333333	1.03044	0.408522	Destabilized	44	1	0.993776	1.01526	1.01868	0.966476
P50750-2	CDK9	Homo sapiens	Isoform 2 of Cyclin-dependent kinase 9	-0.0333333	1.03044	0.408522	Destabilized	46	1	0.983626	0.968425	1.02665	0.996837
P50750-2	CDK9	Homo sapiens	Isoform 2 of Cyclin-dependent kinase 9	-0.0333333	1.03044	0.408522	Destabilized	48	1	1.02436	0.983123	1.00929	1.08205
P50750-2	CDK9	Homo sapiens	Isoform 2 of Cyclin-dependent kinase 9	-0.0333333	1.03044	0.408522	Destabilized	50	1	1.00875	0.877994	0.999869	1.06325
P50750-2	CDK9	Homo sapiens	Isoform 2 of Cyclin-dependent kinase 9	-0.0333333	1.03044	0.408522	Destabilized	52	NaN	NaN	NaN	NaN	NaN
P50750-2	CDK9	Homo sapiens	Isoform 2 of Cyclin-dependent kinase 9	-0.0333333	1.03044	0.408522	Destabilized	54	1	0.963639	0.630108	0.920962	1.04235
P50750-2	CDK9	Homo sapiens	Isoform 2 of Cyclin-dependent kinase 9	-0.0333333	1.03044	0.408522	Destabilized	56	NaN	NaN	NaN	NaN	NaN
P50750-2	CDK9	Homo sapiens	Isoform 2 of Cyclin-dependent kinase 9	-0.0333333	1.03044	0.408522	Destabilized	58	1	0.833584	0.789099	1.06016	1.19899
P50750-2	CDK9	Homo sapiens	Isoform 2 of Cyclin-dependent kinase 9	-0.0333333	1.03044	0.408522	Destabilized	60	1	0.716998	0.763444	0.638893	0.735751
P50750-2	CDK9	Homo sapiens	Isoform 2 of Cyclin-dependent kinase 9	-0.0333333	1.03044	0.408522	Destabilized	62	1	0.839726	0.951776	1.43077	1.76323
P50750-2	CDK9	Homo sapiens	Isoform 2 of Cyclin-dependent kinase 9	-0.0333333	1.03044	0.408522	Destabilized	64	1	1.28895	0.916178	2.13866	2.10014
Q9BY42	RTFDC1	Homo sapiens	Protein RTF2 homolog	-0.0333333	1.01079	0.408522	Destabilized	42	1	1.00868	0.95527	0.957475	0.984152
Q9BY42	RTFDC1	Homo sapiens	Protein RTF2 homolog	-0.0333333	1.01079	0.408522	Destabilized	44	1	1.024	1.01433	1.00676	0.900533
Q9BY42	RTFDC1	Homo sapiens	Protein RTF2 homolog	-0.0333333	1.01079	0.408522	Destabilized	46	1	0.947335	1.00304	0.896678	0.849706
Q9BY42	RTFDC1	Homo sapiens	Protein RTF2 homolog	-0.0333333	1.01079	0.408522	Destabilized	48	1	0.988151	0.851836	0.884532	0.976301
Q9BY42	RTFDC1	Homo sapiens	Protein RTF2 homolog	-0.0333333	1.01079	0.408522	Destabilized	50	1	0.891094	0.886129	0.686993	0.739771
Q9BY42	RTFDC1	Homo sapiens	Protein RTF2 homolog	-0.0333333	1.01079	0.408522	Destabilized	52	NaN	NaN	NaN	NaN	NaN
Q9BY42	RTFDC1	Homo sapiens	Protein RTF2 homolog	-0.0333333	1.01079	0.408522	Destabilized	54	1	0.984757	0.758573	0.870584	0.836798
Q9BY42	RTFDC1	Homo sapiens	Protein RTF2 homolog	-0.0333333	1.01079	0.408522	Destabilized	56	NaN	NaN	NaN	NaN	NaN
Q9BY42	RTFDC1	Homo sapiens	Protein RTF2 homolog	-0.0333333	1.01079	0.408522	Destabilized	58	1	1.14175	1.12534	0.984619	1.09765
Q9BY42	RTFDC1	Homo sapiens	Protein RTF2 homolog	-0.0333333	1.01079	0.408522	Destabilized	60	1	0.778567	0.726879	1.02804	1.34624
Q9BY42	RTFDC1	Homo sapiens	Protein RTF2 homolog	-0.0333333	1.01079	0.408522	Destabilized	62	1	3.00506	0.86748	1.21953	1.19399
Q9BY42	RTFDC1	Homo sapiens	Protein RTF2 homolog	-0.0333333	1.01079	0.408522	Destabilized	64	1	1.13661	1.04476	1.04752	1
Q9NRL2	BAZ1A	Homo sapiens	Bromodomain adjacent to zinc finger domain protein 1A	-0.05	1.00957	0.214842	Solubility/Expression	42	1	2.93121	0.754234	0.882836	0.719512
Q9NRL2	BAZ1A	Homo sapiens	Bromodomain adjacent to zinc finger domain protein 1A	-0.05	1.00957	0.214842	Solubility/Expression	44	NaN	NaN	NaN	NaN	NaN
Q9NRL2	BAZ1A	Homo sapiens	Bromodomain adjacent to zinc finger domain protein 1A	-0.05	1.00957	0.214842	Solubility/Expression	46	NaN	NaN	NaN	NaN	NaN
Q9NRL2	BAZ1A	Homo sapiens	Bromodomain adjacent to zinc finger domain protein 1A	-0.05	1.00957	0.214842	Solubility/Expression	48	NaN	NaN	NaN	NaN	NaN
Q9NRL2	BAZ1A	Homo sapiens	Bromodomain adjacent to zinc finger domain protein 1A	-0.05	1.00957	0.214842	Solubility/Expression	50	NaN	NaN	NaN	NaN	NaN
Q9NRL2	BAZ1A	Homo sapiens	Bromodomain adjacent to zinc finger domain protein 1A	-0.05	1.00957	0.214842	Solubility/Expression	52	NaN	NaN	NaN	NaN	NaN
Q9NRL2	BAZ1A	Homo sapiens	Bromodomain adjacent to zinc finger domain protein 1A	-0.05	1.00957	0.214842	Solubility/Expression	54	NaN	NaN	NaN	NaN	NaN
Q9NRL2	BAZ1A	Homo sapiens	Bromodomain adjacent to zinc finger domain protein 1A	-0.05	1.00957	0.214842	Solubility/Expression	56	NaN	NaN	NaN	NaN	NaN
Q9NRL2	BAZ1A	Homo sapiens	Bromodomain adjacent to zinc finger domain protein 1A	-0.05	1.00957	0.214842	Solubility/Expression	58	NaN	NaN	NaN	NaN	NaN
Q9NRL2	BAZ1A	Homo sapiens	Bromodomain adjacent to zinc finger domain protein 1A	-0.05	1.00957	0.214842	Solubility/Expression	60	NaN	NaN	NaN	NaN	NaN
Q9NRL2	BAZ1A	Homo sapiens	Bromodomain adjacent to zinc finger domain protein 1A	-0.05	1.00957	0.214842	Solubility/Expression	62	1	0.70002	0.713627	0.919078	0.953627
Q9NRL2	BAZ1A	Homo sapiens	Bromodomain adjacent to zinc finger domain protein 1A	-0.05	1.00957	0.214842	Solubility/Expression	64	NaN	NaN	NaN	NaN	NaN
Q9BRX5	GINS3	Homo sapiens	DNA replication complex GINS protein PSF3	-0.05	1.04619	0.214842	Destabilized	42	1	1.02836	0.992873	1.04067	1.07301
Q9BRX5	GINS3	Homo sapiens	DNA replication complex GINS protein PSF3	-0.05	1.04619	0.214842	Destabilized	44	1	1.11099	1.07568	1.07419	1.05412
Q9BRX5	GINS3	Homo sapiens	DNA replication complex GINS protein PSF3	-0.05	1.04619	0.214842	Destabilized	46	1	1.03415	1.05372	1.06032	1.04575
Q9BRX5	GINS3	Homo sapiens	DNA replication complex GINS protein PSF3	-0.05	1.04619	0.214842	Destabilized	48	1	1.00634	1.01635	1.01994	1.0241
Q9BRX5	GINS3	Homo sapiens	DNA replication complex GINS protein PSF3	-0.05	1.04619	0.214842	Destabilized	50	1	1.07985	1.04065	1.01316	1.07771
Q9BRX5	GINS3	Homo sapiens	DNA replication complex GINS protein PSF3	-0.05	1.04619	0.214842	Destabilized	52	1	1.00817	1.0005	1.04179	1.08411
Q9BRX5	GINS3	Homo sapiens	DNA replication complex GINS protein PSF3	-0.05	1.04619	0.214842	Destabilized	54	1	0.976437	0.913032	1.13317	1.20379
Q9BRX5	GINS3	Homo sapiens	DNA replication complex GINS protein PSF3	-0.05	1.04619	0.214842	Destabilized	56	1	0.966186	0.930817	1.00442	0.93097
Q9BRX5	GINS3	Homo sapiens	DNA replication complex GINS protein PSF3	-0.05	1.04619	0.214842	Destabilized	58	1	1.04834	1.13764	1.19407	1.22258
Q9BRX5	GINS3	Homo sapiens	DNA replication complex GINS protein PSF3	-0.05	1.04619	0.214842	Destabilized	60	1	1.10238	1.11438	1.34127	1.31178
Q9BRX5	GINS3	Homo sapiens	DNA replication complex GINS protein PSF3	-0.05	1.04619	0.214842	Destabilized	62	1	1.21013	0.980553	0.842394	0.816513
Q9BRX5	GINS3	Homo sapiens	DNA replication complex GINS protein PSF3	-0.05	1.04619	0.214842	Destabilized	64	1	1.12543	1.0265	1.04926	1.13259
P49643	PRIM2	Homo sapiens	DNA primase large subunit	-0.05	1.03783	0.214842	Destabilized	42	1	0.959626	0.948775	0.956651	0.992296
P49643	PRIM2	Homo sapiens	DNA primase large subunit	-0.05	1.03783	0.214842	Destabilized	44	1	1.01054	0.977222	1.04204	1.06867
P49643	PRIM2	Homo sapiens	DNA primase large subunit	-0.05	1.03783	0.214842	Destabilized	46	1	0.948606	0.941039	0.956434	1.06407
P49643	PRIM2	Homo sapiens	DNA primase large subunit	-0.05	1.03783	0.214842	Destabilized	48	1	0.980774	1.00452	0.976347	1.04424
P49643	PRIM2	Homo sapiens	DNA primase large subunit	-0.05	1.03783	0.214842	Destabilized	50	1	1.04091	0.881988	0.861887	1.26674
P49643	PRIM2	Homo sapiens	DNA primase large subunit	-0.05	1.03783	0.214842	Destabilized	52	NaN	NaN	NaN	NaN	NaN
P49643	PRIM2	Homo sapiens	DNA primase large subunit	-0.05	1.03783	0.214842	Destabilized	54	1	0.812127	0.946415	1.38033	0.658633
P49643	PRIM2	Homo sapiens	DNA primase large subunit	-0.05	1.03783	0.214842	Destabilized	56	NaN	NaN	NaN	NaN	NaN
P49643	PRIM2	Homo sapiens	DNA primase large subunit	-0.05	1.03783	0.214842	Destabilized	58	1	0.908486	0.915116	1.04361	1.06017
P49643	PRIM2	Homo sapiens	DNA primase large subunit	-0.05	1.03783	0.214842	Destabilized	60	1	0.962544	0.991773	1.23539	1.20697
P49643	PRIM2	Homo sapiens	DNA primase large subunit	-0.05	1.03783	0.214842	Destabilized	62	1	1.05958	0.737678	1.56509	1.79308
P49643	PRIM2	Homo sapiens	DNA primase large subunit	-0.05	1.03783	0.214842	Destabilized	64	1	1.11984	0.838885	1.58155	1.52893
P06746	POLB	Homo sapiens	DNA polymerase beta	-0.05	1.02589	0.214842	Destabilized	42	1	0.981746	0.991434	0.964536	0.967068
P06746	POLB	Homo sapiens	DNA polymerase beta	-0.05	1.02589	0.214842	Destabilized	44	1	1.05986	1.07467	1.08825	1.11937
P06746	POLB	Homo sapiens	DNA polymerase beta	-0.05	1.02589	0.214842	Destabilized	46	1	0.984697	0.90989	1.02814	1.06954
P06746	POLB	Homo sapiens	DNA polymerase beta	-0.05	1.02589	0.214842	Destabilized	48	NaN	NaN	NaN	NaN	NaN
P06746	POLB	Homo sapiens	DNA polymerase beta	-0.05	1.02589	0.214842	Destabilized	50	NaN	NaN	NaN	NaN	NaN
P06746	POLB	Homo sapiens	DNA polymerase beta	-0.05	1.02589	0.214842	Destabilized	52	NaN	NaN	NaN	NaN	NaN
P06746	POLB	Homo sapiens	DNA polymerase beta	-0.05	1.02589	0.214842	Destabilized	54	NaN	NaN	NaN	NaN	NaN
P06746	POLB	Homo sapiens	DNA polymerase beta	-0.05	1.02589	0.214842	Destabilized	56	NaN	NaN	NaN	NaN	NaN
P06746	POLB	Homo sapiens	DNA polymerase beta	-0.05	1.02589	0.214842	Destabilized	58	1	0.98071	0.905037	0.984543	1.09444
P06746	POLB	Homo sapiens	DNA polymerase beta	-0.05	1.02589	0.214842	Destabilized	60	NaN	NaN	NaN	NaN	NaN
P06746	POLB	Homo sapiens	DNA polymerase beta	-0.05	1.02589	0.214842	Destabilized	62	1	0.828978	0.977478	0.863211	0.909444
P06746	POLB	Homo sapiens	DNA polymerase beta	-0.05	1.02589	0.214842	Destabilized	64	1	1.64134	1.12131	1.47012	1.53751
P51530	DNA2	Homo sapiens	DNA replication ATP-dependent helicase/nuclease DNA2	-0.05	1.02167	0.214842	Destabilized	42	NaN	NaN	NaN	NaN	NaN
P51530	DNA2	Homo sapiens	DNA replication ATP-dependent helicase/nuclease DNA2	-0.05	1.02167	0.214842	Destabilized	44	1	1.02408	1.00273	1.3062	0.97687
P51530	DNA2	Homo sapiens	DNA replication ATP-dependent helicase/nuclease DNA2	-0.05	1.02167	0.214842	Destabilized	46	NaN	NaN	NaN	NaN	NaN
P51530	DNA2	Homo sapiens	DNA replication ATP-dependent helicase/nuclease DNA2	-0.05	1.02167	0.214842	Destabilized	48	1	0.846687	0.786877	1.16657	0.981872
P51530	DNA2	Homo sapiens	DNA replication ATP-dependent helicase/nuclease DNA2	-0.05	1.02167	0.214842	Destabilized	50	NaN	NaN	NaN	NaN	NaN
P51530	DNA2	Homo sapiens	DNA replication ATP-dependent helicase/nuclease DNA2	-0.05	1.02167	0.214842	Destabilized	52	NaN	NaN	NaN	NaN	NaN
P51530	DNA2	Homo sapiens	DNA replication ATP-dependent helicase/nuclease DNA2	-0.05	1.02167	0.214842	Destabilized	54	NaN	NaN	NaN	NaN	NaN
P51530	DNA2	Homo sapiens	DNA replication ATP-dependent helicase/nuclease DNA2	-0.05	1.02167	0.214842	Destabilized	56	NaN	NaN	NaN	NaN	NaN
P51530	DNA2	Homo sapiens	DNA replication ATP-dependent helicase/nuclease DNA2	-0.05	1.02167	0.214842	Destabilized	58	NaN	NaN	NaN	NaN	NaN
P51530	DNA2	Homo sapiens	DNA replication ATP-dependent helicase/nuclease DNA2	-0.05	1.02167	0.214842	Destabilized	60	1	1.57524	1.6334	1.22652	1.03412
P51530	DNA2	Homo sapiens	DNA replication ATP-dependent helicase/nuclease DNA2	-0.05	1.02167	0.214842	Destabilized	62	NaN	NaN	NaN	NaN	NaN
P51530	DNA2	Homo sapiens	DNA replication ATP-dependent helicase/nuclease DNA2	-0.05	1.02167	0.214842	Destabilized	64	1	0.882995	1.10434	0.907305	0.844673
Q6IQ49	SDE2	Homo sapiens	Replication stress response regulator SDE2	-0.05	1.01068	0.214842	Destabilized	42	NaN	NaN	NaN	NaN	NaN
Q6IQ49	SDE2	Homo sapiens	Replication stress response regulator SDE2	-0.05	1.01068	0.214842	Destabilized	44	1	1.07627	0.904871	1.05062	0.93648
Q6IQ49	SDE2	Homo sapiens	Replication stress response regulator SDE2	-0.05	1.01068	0.214842	Destabilized	46	1	1.02245	0.929176	1.12702	0.999483
Q6IQ49	SDE2	Homo sapiens	Replication stress response regulator SDE2	-0.05	1.01068	0.214842	Destabilized	48	1	1.01141	0.962421	1.04838	0.943983
Q6IQ49	SDE2	Homo sapiens	Replication stress response regulator SDE2	-0.05	1.01068	0.214842	Destabilized	50	1	1.07252	1.00742	1.02349	0.984636
Q6IQ49	SDE2	Homo sapiens	Replication stress response regulator SDE2	-0.05	1.01068	0.214842	Destabilized	52	NaN	NaN	NaN	NaN	NaN
Q6IQ49	SDE2	Homo sapiens	Replication stress response regulator SDE2	-0.05	1.01068	0.214842	Destabilized	54	1	1.0613	0.99799	1.22009	1.15286
Q6IQ49	SDE2	Homo sapiens	Replication stress response regulator SDE2	-0.05	1.01068	0.214842	Destabilized	56	NaN	NaN	NaN	NaN	NaN
Q6IQ49	SDE2	Homo sapiens	Replication stress response regulator SDE2	-0.05	1.01068	0.214842	Destabilized	58	1	1.09202	0.890543	0.753122	0.814076
Q6IQ49	SDE2	Homo sapiens	Replication stress response regulator SDE2	-0.05	1.01068	0.214842	Destabilized	60	1	1.14491	1.15997	1.03553	1.09042
Q6IQ49	SDE2	Homo sapiens	Replication stress response regulator SDE2	-0.05	1.01068	0.214842	Destabilized	62	NaN	NaN	NaN	NaN	NaN
Q6IQ49	SDE2	Homo sapiens	Replication stress response regulator SDE2	-0.05	1.01068	0.214842	Destabilized	64	1	0.944029	1.08714	0.980568	1.1155
Q92993-3	KAT5	Homo sapiens	Isoform 3 of Histone acetyltransferase KAT5	-0.05	1.0073	0.214842	Destabilized	42	NaN	NaN	NaN	NaN	NaN
Q92993-3	KAT5	Homo sapiens	Isoform 3 of Histone acetyltransferase KAT5	-0.05	1.0073	0.214842	Destabilized	44	1	1.21348	1.35291	1.17185	1.30241
Q92993-3	KAT5	Homo sapiens	Isoform 3 of Histone acetyltransferase KAT5	-0.05	1.0073	0.214842	Destabilized	46	NaN	NaN	NaN	NaN	NaN
Q92993-3	KAT5	Homo sapiens	Isoform 3 of Histone acetyltransferase KAT5	-0.05	1.0073	0.214842	Destabilized	48	NaN	NaN	NaN	NaN	NaN
Q92993-3	KAT5	Homo sapiens	Isoform 3 of Histone acetyltransferase KAT5	-0.05	1.0073	0.214842	Destabilized	50	NaN	NaN	NaN	NaN	NaN
Q92993-3	KAT5	Homo sapiens	Isoform 3 of Histone acetyltransferase KAT5	-0.05	1.0073	0.214842	Destabilized	52	NaN	NaN	NaN	NaN	NaN
Q92993-3	KAT5	Homo sapiens	Isoform 3 of Histone acetyltransferase KAT5	-0.05	1.0073	0.214842	Destabilized	54	NaN	NaN	NaN	NaN	NaN
Q92993-3	KAT5	Homo sapiens	Isoform 3 of Histone acetyltransferase KAT5	-0.05	1.0073	0.214842	Destabilized	56	NaN	NaN	NaN	NaN	NaN
Q92993-3	KAT5	Homo sapiens	Isoform 3 of Histone acetyltransferase KAT5	-0.05	1.0073	0.214842	Destabilized	58	NaN	NaN	NaN	NaN	NaN
Q92993-3	KAT5	Homo sapiens	Isoform 3 of Histone acetyltransferase KAT5	-0.05	1.0073	0.214842	Destabilized	60	NaN	NaN	NaN	NaN	NaN
Q92993-3	KAT5	Homo sapiens	Isoform 3 of Histone acetyltransferase KAT5	-0.05	1.0073	0.214842	Destabilized	62	NaN	NaN	NaN	NaN	NaN
Q92993-3	KAT5	Homo sapiens	Isoform 3 of Histone acetyltransferase KAT5	-0.05	1.0073	0.214842	Destabilized	64	1	0.785826	0.824459	0.786894	NaN
Q92547	TOPBP1	Homo sapiens	DNA topoisomerase 2-binding protein 1	-0.05	0.993169	0.214842	Destabilized	42	1	0.989008	1.1319	1.0502	1.06467
Q92547	TOPBP1	Homo sapiens	DNA topoisomerase 2-binding protein 1	-0.05	0.993169	0.214842	Destabilized	44	NaN	NaN	NaN	NaN	NaN
Q92547	TOPBP1	Homo sapiens	DNA topoisomerase 2-binding protein 1	-0.05	0.993169	0.214842	Destabilized	46	NaN	NaN	NaN	NaN	NaN
Q92547	TOPBP1	Homo sapiens	DNA topoisomerase 2-binding protein 1	-0.05	0.993169	0.214842	Destabilized	48	NaN	NaN	NaN	NaN	NaN
Q92547	TOPBP1	Homo sapiens	DNA topoisomerase 2-binding protein 1	-0.05	0.993169	0.214842	Destabilized	50	NaN	NaN	NaN	NaN	NaN
Q92547	TOPBP1	Homo sapiens	DNA topoisomerase 2-binding protein 1	-0.05	0.993169	0.214842	Destabilized	52	NaN	NaN	NaN	NaN	NaN
Q92547	TOPBP1	Homo sapiens	DNA topoisomerase 2-binding protein 1	-0.05	0.993169	0.214842	Destabilized	54	NaN	NaN	NaN	NaN	NaN
Q92547	TOPBP1	Homo sapiens	DNA topoisomerase 2-binding protein 1	-0.05	0.993169	0.214842	Destabilized	56	NaN	NaN	NaN	NaN	NaN
Q92547	TOPBP1	Homo sapiens	DNA topoisomerase 2-binding protein 1	-0.05	0.993169	0.214842	Destabilized	58	NaN	NaN	NaN	NaN	NaN
Q92547	TOPBP1	Homo sapiens	DNA topoisomerase 2-binding protein 1	-0.05	0.993169	0.214842	Destabilized	60	NaN	NaN	NaN	NaN	NaN
Q92547	TOPBP1	Homo sapiens	DNA topoisomerase 2-binding protein 1	-0.05	0.993169	0.214842	Destabilized	62	1	0.66606	0.928665	0.779761	0.979894
Q92547	TOPBP1	Homo sapiens	DNA topoisomerase 2-binding protein 1	-0.05	0.993169	0.214842	Destabilized	64	NaN	NaN	NaN	NaN	NaN
P15927-3	RPA2	Homo sapiens	Isoform 3 of Replication protein A 32 kDa subunit	-0.0666667	1.06387	0.0980825	Destabilized	42	1	1.09199	1.01527	1.01339	1.04222
P15927-3	RPA2	Homo sapiens	Isoform 3 of Replication protein A 32 kDa subunit	-0.0666667	1.06387	0.0980825	Destabilized	44	1	1.04439	1.01211	1.02796	1.00845
P15927-3	RPA2	Homo sapiens	Isoform 3 of Replication protein A 32 kDa subunit	-0.0666667	1.06387	0.0980825	Destabilized	46	1	1.03226	1.03891	1.024	1.04328
P15927-3	RPA2	Homo sapiens	Isoform 3 of Replication protein A 32 kDa subunit	-0.0666667	1.06387	0.0980825	Destabilized	48	1	1.04015	1.05065	0.993272	1.0441
P15927-3	RPA2	Homo sapiens	Isoform 3 of Replication protein A 32 kDa subunit	-0.0666667	1.06387	0.0980825	Destabilized	50	1	1.07024	1.02947	1.00257	1.06393
P15927-3	RPA2	Homo sapiens	Isoform 3 of Replication protein A 32 kDa subunit	-0.0666667	1.06387	0.0980825	Destabilized	52	1	1.10531	1.07934	1.02303	1.05542
P15927-3	RPA2	Homo sapiens	Isoform 3 of Replication protein A 32 kDa subunit	-0.0666667	1.06387	0.0980825	Destabilized	54	1	1.0178	1.07685	1.03054	1.0114
P15927-3	RPA2	Homo sapiens	Isoform 3 of Replication protein A 32 kDa subunit	-0.0666667	1.06387	0.0980825	Destabilized	56	1	1.03452	1.08768	1.02613	1.00848
P15927-3	RPA2	Homo sapiens	Isoform 3 of Replication protein A 32 kDa subunit	-0.0666667	1.06387	0.0980825	Destabilized	58	1	1.08941	1.09694	1.06504	1.09442
P15927-3	RPA2	Homo sapiens	Isoform 3 of Replication protein A 32 kDa subunit	-0.0666667	1.06387	0.0980825	Destabilized	60	1	0.792444	0.859185	0.87421	0.865387
P15927-3	RPA2	Homo sapiens	Isoform 3 of Replication protein A 32 kDa subunit	-0.0666667	1.06387	0.0980825	Destabilized	62	1	1.29122	1.19389	1.55703	1.57865
P15927-3	RPA2	Homo sapiens	Isoform 3 of Replication protein A 32 kDa subunit	-0.0666667	1.06387	0.0980825	Destabilized	64	1	1.13586	1.07716	1.48745	1.52899
Q29RF7	PDS5A	Homo sapiens	Sister chromatid cohesion protein PDS5 homolog A	-0.0666667	1.02596	0.0980825	Destabilized	42	1	0.980125	0.993052	0.987811	0.972608
Q29RF7	PDS5A	Homo sapiens	Sister chromatid cohesion protein PDS5 homolog A	-0.0666667	1.02596	0.0980825	Destabilized	44	1	1.00076	1.00993	1.02937	1.01104
Q29RF7	PDS5A	Homo sapiens	Sister chromatid cohesion protein PDS5 homolog A	-0.0666667	1.02596	0.0980825	Destabilized	46	1	0.960235	0.985036	0.987854	0.96496
Q29RF7	PDS5A	Homo sapiens	Sister chromatid cohesion protein PDS5 homolog A	-0.0666667	1.02596	0.0980825	Destabilized	48	1	1.00015	1.05343	1.00475	1.11484
Q29RF7	PDS5A	Homo sapiens	Sister chromatid cohesion protein PDS5 homolog A	-0.0666667	1.02596	0.0980825	Destabilized	50	1	0.886027	0.929743	1.1334	1.02396
Q29RF7	PDS5A	Homo sapiens	Sister chromatid cohesion protein PDS5 homolog A	-0.0666667	1.02596	0.0980825	Destabilized	52	1	0.91024	0.778275	1.03802	0.754496
Q29RF7	PDS5A	Homo sapiens	Sister chromatid cohesion protein PDS5 homolog A	-0.0666667	1.02596	0.0980825	Destabilized	54	1	1.12995	1.10647	1.13658	1.0546
Q29RF7	PDS5A	Homo sapiens	Sister chromatid cohesion protein PDS5 homolog A	-0.0666667	1.02596	0.0980825	Destabilized	56	1	1.18461	1.17792	1.32765	1.62418
Q29RF7	PDS5A	Homo sapiens	Sister chromatid cohesion protein PDS5 homolog A	-0.0666667	1.02596	0.0980825	Destabilized	58	1	0.982716	0.980363	1.09662	1.11107
Q29RF7	PDS5A	Homo sapiens	Sister chromatid cohesion protein PDS5 homolog A	-0.0666667	1.02596	0.0980825	Destabilized	60	1	1.0741	0.854078	0.931087	0.829905
Q29RF7	PDS5A	Homo sapiens	Sister chromatid cohesion protein PDS5 homolog A	-0.0666667	1.02596	0.0980825	Destabilized	62	1	0.922258	0.955008	1.10008	1.10982
Q29RF7	PDS5A	Homo sapiens	Sister chromatid cohesion protein PDS5 homolog A	-0.0666667	1.02596	0.0980825	Destabilized	64	1	0.980661	1.00596	1.19066	1.18131
Q9UBD5-2	ORC3	Homo sapiens	Isoform 2 of Origin recognition complex subunit 3	-0.0666667	1.01975	0.0980825	Destabilized	42	1	0.933741	0.936829	0.908051	0.899952
Q9UBD5-2	ORC3	Homo sapiens	Isoform 2 of Origin recognition complex subunit 3	-0.0666667	1.01975	0.0980825	Destabilized	44	1	1.0135	1.01083	1.05537	1.04354
Q9UBD5-2	ORC3	Homo sapiens	Isoform 2 of Origin recognition complex subunit 3	-0.0666667	1.01975	0.0980825	Destabilized	46	1	0.974329	0.875195	1.02009	1.175
Q9UBD5-2	ORC3	Homo sapiens	Isoform 2 of Origin recognition complex subunit 3	-0.0666667	1.01975	0.0980825	Destabilized	48	NaN	NaN	NaN	NaN	NaN
Q9UBD5-2	ORC3	Homo sapiens	Isoform 2 of Origin recognition complex subunit 3	-0.0666667	1.01975	0.0980825	Destabilized	50	NaN	NaN	NaN	NaN	NaN
Q9UBD5-2	ORC3	Homo sapiens	Isoform 2 of Origin recognition complex subunit 3	-0.0666667	1.01975	0.0980825	Destabilized	52	NaN	NaN	NaN	NaN	NaN
Q9UBD5-2	ORC3	Homo sapiens	Isoform 2 of Origin recognition complex subunit 3	-0.0666667	1.01975	0.0980825	Destabilized	54	NaN	NaN	NaN	NaN	NaN
Q9UBD5-2	ORC3	Homo sapiens	Isoform 2 of Origin recognition complex subunit 3	-0.0666667	1.01975	0.0980825	Destabilized	56	NaN	NaN	NaN	NaN	NaN
Q9UBD5-2	ORC3	Homo sapiens	Isoform 2 of Origin recognition complex subunit 3	-0.0666667	1.01975	0.0980825	Destabilized	58	1	1.00857	0.631534	1.24857	1.26057
Q9UBD5-2	ORC3	Homo sapiens	Isoform 2 of Origin recognition complex subunit 3	-0.0666667	1.01975	0.0980825	Destabilized	60	NaN	NaN	NaN	NaN	NaN
Q9UBD5-2	ORC3	Homo sapiens	Isoform 2 of Origin recognition complex subunit 3	-0.0666667	1.01975	0.0980825	Destabilized	62	1	0.789456	0.73588	1.0317	1.06571
Q9UBD5-2	ORC3	Homo sapiens	Isoform 2 of Origin recognition complex subunit 3	-0.0666667	1.01975	0.0980825	Destabilized	64	1	1.20299	0.912039	1.87129	1.58052
Q13535	ATR	Homo sapiens	Serine/threonine-protein kinase ATR	-0.0666667	1.01466	0.0980825	Solubility/Expression	42	1	0.885931	0.928363	0.944883	0.83004
Q13535	ATR	Homo sapiens	Serine/threonine-protein kinase ATR	-0.0666667	1.01466	0.0980825	Solubility/Expression	44	1	1.12404	1.10454	1.0395	0.888466
Q13535	ATR	Homo sapiens	Serine/threonine-protein kinase ATR	-0.0666667	1.01466	0.0980825	Solubility/Expression	46	1	0.977597	0.950725	0.934345	0.95429
Q13535	ATR	Homo sapiens	Serine/threonine-protein kinase ATR	-0.0666667	1.01466	0.0980825	Solubility/Expression	48	NaN	NaN	NaN	NaN	NaN
Q13535	ATR	Homo sapiens	Serine/threonine-protein kinase ATR	-0.0666667	1.01466	0.0980825	Solubility/Expression	50	NaN	NaN	NaN	NaN	NaN
Q13535	ATR	Homo sapiens	Serine/threonine-protein kinase ATR	-0.0666667	1.01466	0.0980825	Solubility/Expression	52	NaN	NaN	NaN	NaN	NaN
Q13535	ATR	Homo sapiens	Serine/threonine-protein kinase ATR	-0.0666667	1.01466	0.0980825	Solubility/Expression	54	NaN	NaN	NaN	NaN	NaN
Q13535	ATR	Homo sapiens	Serine/threonine-protein kinase ATR	-0.0666667	1.01466	0.0980825	Solubility/Expression	56	NaN	NaN	NaN	NaN	NaN
[truncated: 1,192 more rows]

## Sheet: +
																		RNA-Seq Data
															Rank	Accession	Gene	SET RITA	SET CONT	P CONT
[truncated: 7,744 more rows]
